# 1 **Brain expression quantitative trait locus and network** 2 **analysis reveals downstream effects and putative** 3 **drivers for brain-related diseases**

4  
5 Niek de Klein<sup>1,4,6,10</sup>, Ellen A. Tsai<sup>2,10</sup>, Martijn Vochteloo<sup>1,3,10</sup>, Denis Baird<sup>2,9,10</sup>, Yunfeng Huang<sup>2</sup>,  
6 Chia-Yen Chen<sup>2</sup>, Sipko van Dam<sup>1,5</sup>, Patrick Deelen<sup>1</sup>, Olivier B. Bakker<sup>1</sup>, Omar El Garwany<sup>1,6</sup>,  
7 Zhengyu Ouyang<sup>7</sup>, Eric E. Marshall<sup>2</sup>, Maria I. Zavodszky<sup>2</sup>, Wouter van Rheenen<sup>8</sup>, Mark K.  
8 Bakker<sup>8</sup>, Jan Veldink<sup>8</sup>, Tom R. Gaunt<sup>9</sup>, Heiko Runz<sup>2,12</sup>, Lude Franke<sup>1,4,12</sup>, Harm-Jan Westra<sup>1,4,12</sup>  
9

- 10 1. Department of Genetics, University Medical Center Groningen, University of Groningen,  
11 Hanzeplein 1, Groningen, The Netherlands
- 12 2. Translational Biology, Research & Development, Biogen Inc., 225 Broadway,  
13 Cambridge, MA, USA
- 14 3. Institute for Life Science & Technology, Hanze University of Applied Sciences,  
15 Zernikeplein 11, 9747 AS Groningen, The Netherlands
- 16 4. Oncode Investigator
- 17 5. Ancora Health, Herestraat 106, 9711 LM, Groningen, The Netherlands
- 18 6. Wellcome Sanger Institute, Wellcome Genome Campus, Hinxton, UK
- 19 7. BioInfoRx, Inc., 510 Charmany Dr, Suite 275A, Madison, WI 53719, USA
- 20 8. Department of Neurology, UMC Utrecht Brain Center, University Medical Center  
21 Utrecht, Utrecht University, Utrecht, The Netherlands.
- 22 9. MRC Integrative Epidemiology Unit, Bristol Medical School, University of Bristol,  
23 Bristol, UK
- 24 10. These authors contributed equally
- 25 11. These authors contributed equally
- 26 12. These authors jointly supervised the work

27

## 28 **Abstract**

29 Gaining insight into the downstream consequences of non-coding variants is an essential step  
30 towards the identification of therapeutic targets from genome-wide association study (GWAS)  
31 findings. Here we have harmonized and integrated 8,727 RNA-seq samples with accompanying  
32 genotype data from multiple brain-regions from 14 datasets. This sample size enabled us to  
33 perform both *cis*- and *trans*-expression quantitative locus (eQTL) mapping. Upon comparing the  
34 brain cortex *cis*-eQTLs (for 12,307 unique genes at FDR<0.05) with a large blood *cis*-eQTL  
35 analysis (n=31,684 samples), we observed that brain eQTLs are more tissue specific than  
36 previously assumed.

37

38 We inferred the brain cell type for 1,515 *cis*-eQTLs by using cell type proportion information.  
39 We conducted Mendelian Randomization on 31 brain-related traits using *cis*-eQTLs as  
40 instruments and found 159 significant findings that also passed colocalization. Furthermore, two  
41 multiple sclerosis (MS) findings had cell type specific signals, a neuron-specific *cis*-eQTL for  
42 *CYP24A1* and a macrophage specific *cis*-eQTL for *CLECLI*.

43

44 To further interpret GWAS hits, we performed *trans*-eQTL analysis. We identified 2,589 *trans*-  
45 eQTLs (at FDR<0.05) for 373 unique SNPs, affecting 1,263 unique genes, and 21 replicated  
46 significantly using single-nucleus RNA-seq data from excitatory neurons.

47

48 We also generated a brain-specific gene-coregulation network that we used to predict which  
49 genes have brain-specific functions, and to perform a novel network analysis of Alzheimer's  
50 disease (AD), amyotrophic lateral sclerosis (ALS), multiple sclerosis (MS) and Parkinson's

51 disease (PD) GWAS data. This resulted in the identification of distinct sets of genes that show  
52 significantly enriched co-regulation with genes inside the associated GWAS loci, and which  
53 might reflect drivers of these diseases.

54

## 55 **Introduction**

56 Diseases of the brain manifesting as psychiatric or neurological conditions continue to be a  
57 massive global health burden: The World Health Organization estimates that in 2019 globally  
58 280 million individuals were affected by depression, 39.5 million by bipolar disorder, and 287.4  
59 million by schizophrenia<sup>1</sup>. Likewise, the fraction of 50 million people living with dementia today  
60 is expected to rise to 152 million by 2050<sup>2</sup>, with similar trajectories for other neurodegenerative  
61 diseases. While substantial progress has been made in uncovering the genetic basis of psychiatric  
62 and neurological diseases through genome-wide association studies (GWAS), much of how the  
63 identified genetic variants impact brain function is still unknown.

64

65 To translate from genetic signals to mechanisms, associations with gene expression levels, or  
66 expression quantitative trait loci (eQTL) have shown great potential. eQTLs can be divided in  
67 direct effects of local genetic variants (*cis*-eQTLs) and indirect effects of distal variants (*trans*-  
68 eQTLs). *Cis*-eQTLs and *trans*-eQTLs can aid interpretation of GWAS loci in several ways. *Cis*-  
69 eQTLs aid interpretation by identifying direct links between genes and phenotypes through  
70 causal inference approaches such as Mendelian randomization (MR) instrumented on QTLs and  
71 genetic colocalization analysis, whereas *trans*-eQTLs expose sets of downstream genes and  
72 pathways on which the effects of disease variants converge.

73

74 eQTLs are dynamic features and vary with tissue, cell type and additional factors such as  
75 response to stimulation. For an optimal interrogation of GWAS loci, it is therefore desirable to  
76 perform eQTL analyses in disease-relevant tissues<sup>3</sup>. To help interpret GWAS of  
77 neurodegenerative and psychiatric diseases, several brain-derived eQTL studies have been  
78 published, including meta-analyses by the PsychENCODE<sup>4</sup> and AMP-AD<sup>5</sup> consortia, which  
79 cover 1,866 and 1,433 individuals, respectively. However, to yield reliable results, statistical  
80 approaches such as MR and colocalization require robust effect size estimates from even larger  
81 carefully curated eQTL datasets. Large sample sizes are better suited to decompose eQTL effects  
82 to specific cell types.

83

84 To maximize the potential of eQTL-based analyses in brain, we here combined and rigorously  
85 harmonized brain RNA-seq and genotype data from 15 different cohorts, including 8,727 RNA-  
86 seq samples from all major brain eQTL studies and publicly available samples from the  
87 European Nucleotide Archive (ENA). By leveraging the statistical power across these datasets,  
88 we created a gene coregulation network based on 8,544 RNA-seq samples covering different  
89 brain regions and performed *cis*- and *trans*-eQTL analysis in up to 2,970 individuals of European  
90 descent, with replication in up to 420 individuals of African descent. This sample size enabled us  
91 to make inferences on the brain cell types in which eQTLs operate, and to systematically conduct  
92 Mendelian Randomization and colocalization analyses to find shared genetic effects between  
93 eQTLs and GWAS traits. This prioritized likely causal genes from GWAS loci for 31 brain-  
94 related traits, including neurodegenerative and psychiatric conditions. Additionally, this  
95 identified cell type dependent eQTLs that may be associated with disease risk (**Figure 1**).

96

## 97 **Results**

### 98 **Leveraging public RNA-seq and genotype data to create large, harmonized brain** 99 **eQTL and gene co-regulation datasets**

100 We combined 15 eQTL datasets into the '*MetaBrain*' resource to maximize statistical power to  
101 detect eQTLs and to create a brain specific gene coregulation network (**Figure 2;**  
102 **Supplementary Table 1, Supplementary Figures 1-5**). *MetaBrain* includes 7,604 RNA-seq  
103 samples and accompanying genotypes from the AMP-AD consortium<sup>6</sup> (AMP-AD MAYO<sup>6</sup>,  
104 ROSMAP<sup>6</sup> and MSBB<sup>6</sup>), Braineac<sup>7</sup>, the PsychENCODE consortium<sup>8</sup> (Bipseq<sup>4</sup>, BrainGVEX<sup>4</sup>,  
105 CMC<sup>9</sup>, GVEX and UCLA\_ASD<sup>4</sup>), BrainSeq<sup>10</sup>, NABEC<sup>11</sup>, TargetALS<sup>12</sup>, and GTEx<sup>3</sup>.  
106 Additionally, we carefully selected 1,759 brain RNA-seq samples from the European Nucleotide  
107 Archive (ENA)<sup>13</sup>, calling and imputing genotypes based on the RNA-seq alignment  
108 (**Supplementary Note, Supplementary Figure 1**). There were 8,727 RNA-seq samples  
109 remaining after realignment and stringent quality control (**Methods and Supplementary Note,**  
110 **Supplementary Figure 2-3**). Using slightly different quality control measures, we created a  
111 gene network using 8,544 samples (**Supplementary Note**). We corrected the RNA-seq data for  
112 technical covariates and defined 7 major tissue groups (amygdala, basal ganglia, cerebellum,  
113 cortex, hippocampus, hypothalamus and spinal cord): Principal Component Analysis (PCA) on  
114 the RNA-seq data showed clear clustering by these major tissue groups, resembling brain  
115 physiology (**Figure 2D, Supplementary Figure 4**). Genotype data revealed individuals from  
116 different ethnicities (**Figure 2B; Supplementary Figure 5**), including 5,138 samples from  
117 European descent (EUR) and 805 samples from African descent (AFR). We created 6 *cis*-eQTL  
118 discovery datasets: Basal ganglia-EUR (n=208), Cerebellum-EUR (n=492), Cortex-EUR  
119 (n=2,970), Cortex-AFR (n=420), Hippocampus-EUR (n=168) and Spinal cord-EUR (n=108;

120 **Supplementary Table 1, Figure 2C).** *Cis*-eQTLs were not calculated for amygdala and  
121 hypothalamus tissue groups due to the small sample size ( $n < 100$ ).

122

123

124 **41% of the cortex *cis*-eQTL genes are regulated by multiple independent variants**

125 Within each discovery dataset, we performed a sample-size weighted *cis*-eQTL meta-analysis on  
126 common variants ( $MAF > 1\%$ ), within 1 megabase (Mb) of the transcription start site (TSS) of a  
127 protein-coding gene. We identified 1,317 (Basal ganglia-EUR), 6,865 (Cerebellum-EUR), 5,440  
128 (Cortex-AFR), 11,803 (Cortex-EUR), 990 (Hippocampus-EUR), and 811 (Spinal cord-EUR) *cis*-  
129 eQTL genes ( $FDR < 0.05$ ; **Figure 3A; Supplementary Table 2**). *Cis*-eQTL effect directions were  
130 highly concordant between datasets included in the Cortex-EUR meta-analysis (median  
131 Spearman  $r = 0.80$ ; median allelic concordance = 89%; **Supplementary Figure 6**), indicating  
132 robustness of the identified effects across datasets. We observed that significant *cis*-eQTL  
133 findings were sensitive to RNA-seq alignment strategies, and it is difficult to confidently  
134 ascertain *cis*-eQTLs in regions with multiple haplotypes represented on patch chromosomes, like  
135 the *MAPT* locus on 17q21 (**Supplementary Note, Supplementary Figures 7-9**). We next  
136 performed conditional analysis to identify independent associations in each *cis*-eQTL locus (e.g.,  
137 secondary, tertiary and quaternary eQTLs). In Cortex-EUR, 4,791 genes had a significant  
138 secondary *cis*-eQTL (41% of *cis*-eQTL genes identified in this dataset). 1,658 genes had tertiary  
139 and 598 had quaternary *cis*-eQTLs. We also identified secondary associations for the other  
140 discovery datasets albeit to a lesser extent (**Figure 3A; Supplementary Table 2 and 3**).

141

142 The properties of the Cortex-EUR *cis*-eQTLs conform to studies performed earlier in blood<sup>14</sup> and  
143 brain<sup>15</sup> (**Figure 3B**): primary lead *cis*-eQTL SNPs were generally located close (median distance:  
144 31 kilobase; kb) to the transcription start site (TSS; **Figure 3B**) and *cis*-eQTL genes had a lower  
145 probability for loss of function intolerance (pLI;  $\chi^2$  p=6.35x10<sup>-147</sup>). Genes with a *cis*-eQTL  
146 generally had a higher median expression than those without (Wilcoxon p-value: 9.96x10<sup>-12</sup>).  
147 Contrary to blood, where genes in the highest expression decile are the most likely to have a *cis*-  
148 eQTL, the third decile of gene expression had the most *cis*-eQTLs in cortex, and higher deciles  
149 had increasingly lower proportions of eQTLs (**Supplementary Note, Supplementary Figure**  
150 **10A**). This could suggest that highly expressed genes in the cortex have tighter genetic  
151 regulation than highly expressed genes in the blood, although we did not observe differences  
152 when comparing variance per gene expression decile between blood and brain (**Supplementary**  
153 **Note, Supplementary Figure 10B**). Cortex-EUR *cis*-eQTL genes showed limited functional  
154 enrichment for human phenotype ontologies (HPO), GO ontologies and TRANSFAC<sup>16</sup>  
155 transcription factor motifs (**Supplementary Figure 10C and D, Supplementary Table 4**). We  
156 observed similar patterns for secondary, tertiary and quaternary *cis*-eQTLs (**Supplementary**  
157 **Note**).

158

159 We investigated differences in *cis*-eQTLs due to ancestry, brain region, data sets and tissue type.  
160 We compared Cortex-EUR, Cortex-AFR and a smaller, East Asian cortex dataset (Cortex-EAS;  
161 n=208, limited to the ENA cohort; **Figure 2C**) and observed high concordance between the  
162 different ethnicities (>95.67%; **Figure 3C**). There was high concordance between different brain  
163 regions overall (>94.58%), though the cerebellum showed lower concordance with the cerebral  
164 brain regions (**Figure 3D**). Despite the limited sample size compared to Cortex-EUR, we

165 identified 846 *cis*-eQTLs that were unique to Cerebellum-EUR (**Supplementary Figure 11A**).

166 Of the 846 Cerebellum-EUR unique *cis*-eQTL genes, 184 had low gene expression levels in

167 cortex, which may explain why they did not have a *cis*-eQTL in that tissue (**Supplementary**

168 **Figure 11B, C, Supplementary Note**). For the remaining 662 genes that were highly expressed

169 in both cortex and cerebellum, we performed functional enrichment of transcription factor

170 binding sites (TFBS; **Supplementary Table 5, Supplementary Note**) and determined that these

171 genes were enriched for TFBS of 101 distinct transcription factors. Five of these transcription

172 factors had low gene expression in cortex and high expression in cerebellum (*EOMES*, *TFAP2B*,

173 *TFAP2A*, *IRX1* and *IRX5*, **Supplementary Figure 11D**). These transcription factors might

174 explain the difference in *cis*-eQTL genes found in cerebellum but not in cortex, while many of

175 these *cis*-eQTL genes are expressed in both tissues. Next, we compared Cortex-EUR *cis*-eQTLs

176 with different tissues from the GTEx project (**Figure 3E; Supplementary Figure 12,**

177 **Supplementary Table 6**). There was high concordance in brain-related tissues (cerebral tissues,

178 >98% and cerebellar tissues, >94%) compared to other tissue types, and the lowest concordance

179 rates were observed in testis (84%) and whole blood (85%). We also compared Cortex-EUR *cis*-

180 eQTLs with eQTLGen<sup>17</sup>, a large blood-based eQTL dataset (n=31,684; majority EUR ancestry)

181 and observed a 76% concordance rate (**Supplementary Figure 13; Supplementary Table 7**)

182 with a moderate correlation of *cis*-eQTL effect sizes ( $R_b=0.54$  including all eQTLs, or  $R_b=0.62$

183 when pruning genes within 1Mb)<sup>18</sup>, supporting the lower concordance observed in GTEx-blood.

184 Since we found that 24% of the shared *cis*-eQTLs between blood and brain showed opposite

185 allelic effects, these results suggest that with larger sample sizes, more tissue specific regulatory

186 variants can be identified. If a causal tissue-specific regulatory variant resides on a haplotype that

187 also contains a variant that is specific for another tissue, it is well conceivable that opposite



188 allelic effects are going to be observed when contrasting eQTLs for these two tissues<sup>19</sup>. Since the  
189 procedures for eQTL mapping were identical between *MetaBrain* and eQTLGen, our results  
190 highlight the relevance of tissue-specific eQTL mapping to accurately assess the directionality of  
191 eQTLs, which can elucidate eQTLs with opposite allelic effects<sup>20</sup>. This direct comparison  
192 illustrates the importance of investigating the appropriate tissue type for the interpretation of  
193 GWAS signals.

194

### 195 **8% of Cortex *cis*-eQTLs are mediated by cell type proportion differences**

196 Cell type dependent eQTLs can be identified in bulk RNA-seq data by performing cell type  
197 deconvolution and determining cell type interaction eQTLs (ieQTLs)<sup>3,21,22</sup>. We predicted five  
198 major cell types using single cell RNA-seq derived signature profiles<sup>23</sup>. Of these, neurons were  
199 the most abundant cell type (median cell proportion: 32.8%), followed by endothelial cells  
200 (24.9%), macrophages (17.8%), oligodendrocytes (12.4%) and astrocytes (12.1%;

201 **Supplementary Figure 14**). We predicted similar proportions for cerebellum as well as other  
202 brain regions. We observed that predicted cell proportions are different for spinal cord, showing  
203 a relatively low proportion of neuronal cells and high proportions of macrophage and  
204 oligodendrocytes compared to other brain tissues, as was previously reported<sup>24</sup> (**Supplementary**  
205 **Figures 15 and 16**). Predicted neuron proportions in both cortex and cerebellum were negatively  
206 correlated with the predicted proportions of other cell types, and predicted endothelial cell  
207 proportions were negatively correlated with predicted macrophage proportions (**Figure 4A**).  
208 Predicted cell type proportions were positively correlated with immunochemistry (IHC) counts  
209 from the ROSMAP cohort<sup>25</sup>, both overall (Spearman  $r=0.71$ ; **Figure 4B**) and per individual cell  
210 type (Spearman  $r>0.1$ ; **Figure 4B**). It is difficult to validate these cell type proportion predictions

211 due to the small scale of the IHC experiment, but also because IHC and bulk RNA-seq reflect  
212 different aspects of gene or protein expression. Thus, there is a level of uncertainty for the  
213 expected proportion for each cell type<sup>26,27</sup>.

214

215 With these predicted cell type proportions, we used DeconQTL<sup>22</sup> to identify interaction-eQTLs  
216 (ieQTLs) by testing 18,850 *cis*-eQTLs in Cortex-EUR and 8,347 *cis*-eQTLs in cerebellum  
217 (including primary, secondary, tertiary and quaternary eQTLs). We identified 1,515 significant  
218 ieQTLs (8%) in at least one cell type (Benjamini-Hochberg; BH FDR<0.05) for Cortex-EUR  
219 (**Supplementary Table 8**). Of these, 632 (42%) were an ieQTL in neurons, likely because this is  
220 the most prevalent cell type. The majority of the ieQTLs (90.2%) were uniquely mapped to one  
221 cell type (**Figure 4C**). Although we observed a lower proportion of ieQTLs in cerebellum (126;  
222 1.5%, **Supplementary Figure 17, Supplementary Table 8**), this is likely a power issue due to  
223 the smaller sample size. While we observed the most ieQTLs for neurons in cortex, the majority  
224 (n=106; 84%) of ieQTLs in cerebellum were mediated by astrocytes and macrophages.

225

226 We compared the allelic direction of the identified ieQTLs for each cell type with matching cell  
227 types from a single nucleus RNA-seq (snRNA-seq) dataset (ROSMAP cohort, n=39;  
228 **Supplementary Table 9**)<sup>28</sup>. When filtering on cell type mediated eQTLs by Decon-QTL  
229 (FDR<0.05), we observed a high average concordance in allelic direction for both the eQTL  
230 main effect (68%), as well as the direction of the interaction (68%; **Supplementary Figure**  
231 **18B**). 106 of the cortex *cis*-ieQTLs were also significant (BH FDR<0.05) in the snRNA-seq  
232 datasets (63 in excitatory neurons and 43 in oligodendrocytes). Of these, 13 excitatory neuron  
233 and 21 oligodendrocyte ieQTLs were cell type mediated by the corresponding cell type in bulk

234 with 100% allelic concordance (Decon-QTL; BH FDR<0.05; **Supplementary Figure 18D**). The  
235 ieQTLs replicating in oligodendrocytes included *STMN4*, *NKAIN1*, and *FAM221A* (**Figure 4D**  
236 **and E and Supplementary Figure 19A-C**), which have previously been identified as  
237 oligodendrocyte specific<sup>29</sup>. Additionally, this set of ieQTLs included *AMPD3* (rs11042811) and  
238 *CD82* (rs2303865), genes involved in the white matter microstructure<sup>30</sup>, suggesting a role for  
239 oligodendrocytes in this pathway. The ieQTLs replicating in excitatory neurons included  
240 *SLC25A27* (alias *UCP4*; **Figure 4F and Supplementary Figure 19D**), a gene principally  
241 expressed in neurons<sup>31</sup> that modulates neuronal metabolism<sup>32</sup>. The eQTL SNP for this gene,  
242 rs2270450, is in high LD ( $r^2=0.71$ ) with a variant previously associated with schizophrenia<sup>33</sup>.  
243 Previous work has suggested a possible role of this gene in Parkinson's disease<sup>34,35</sup>. These results  
244 suggest that the decomposition of eQTLs to their relevant cell types in *MetaBrain* yields  
245 additional valuable information about the underlying biological mechanisms of genes and cell  
246 types of interest for genes associated with disease.

247

#### 248 **Shared genetic effects between Cortex-EUR *cis*-eQTLs and brain-related traits**

249 As one application of the *MetaBrain* resource, we linked *cis*-eQTLs to variants associated with  
250 brain-related traits and diseases. For this, we first evaluated linkage disequilibrium (LD) between  
251 the Cortex-EUR *cis*-eQTL SNPs with the strongest association signals and index variants  
252 identified in 1,057 GWASs of brain-related traits (**Supplementary Note, Supplementary Table**  
253 **10**). We observed that 10% of brain-related trait SNPs for 242 eQTL genes were in LD with *cis*-  
254 eQTL SNPs ( $r^2>0.8$ ). This percentage marginally increased to 12% when secondary, tertiary and  
255 quaternary eQTL SNPs were included, indicating that the majority of LD overlap is driven by

256 primary eQTL effects: primary eQTLs were 3.3-fold more likely to be in LD with a GWAS SNP  
257 (Fisher exact test p-value =  $6.2 \times 10^{-16}$ ; **Supplementary Note**).

258

259 To more formally test for overlap between GWAS and *cis*-eQTL signals, we conducted  
260 Mendelian randomization (MR) to test for a causal effect between gene expression and 31  
261 neurological traits using *cis*-eQTLs as instruments (**Supplementary Table 11**). We computed a  
262 Wald ratio for each eQTL instrument, from which 1,192 Wald ratios out of 268,030 tested in  
263 total passed a suggestive p-value threshold ( $p < 5 \times 10^{-5}$ ; **Supplementary Table 12**). 120 of the *cis*-  
264 eQTL instruments from these suggestive findings were also cell type ieQTLs. We further  
265 prioritized our list of genes with evidence of Wald ratio effects by determining genetic  
266 colocalization between GWAS and *cis*-eQTL signals using *coloc*<sup>36</sup>. There were 159 significant  
267 Wald ratios that passed a strict Bonferroni correction ( $p < 1.87 \times 10^{-7}$ ) where the GWAS SNP and  
268 eQTL colocalized ( $PP4 > 0.7$ ; **Figure 5A**; **Supplementary Figure 20**). 69 of these prioritized  
269 findings were associated with neurological and neuropsychiatric disease risk (**Table 1**). Three  
270 examples where MR and colocalization pointed to likely causal GWAS genes are reported  
271 below, for others, see **Supplementary Note, Supplementary Tables 11-16 and**  
272 **Supplementary Figures 21 and 22**.

273

#### 274 **MR comparison between blood and brain eQTL datasets**

275 MR analysis for multiple sclerosis (MS)<sup>37</sup> identified 102 instruments in 83 genes that passed the  
276 Bonferroni-adjusted p-value threshold (**Supplementary Table 12**). 20 of these findings passed  
277 colocalization (**Table 1**; **Figure 5B**). This included 11 genes for which MR suggested that  
278 increased gene expression and 9 genes where decreased gene expression may confer MS risk.

279 Systematic comparison of the Wald ratio estimates for MS of 5,919 shared *cis*-eQTL genes  
280 between Cortex-EUR and eQTLGen (where the same gene was instrumented but could be with  
281 different SNPs)<sup>17</sup> showed opposite directions of effect for 2,291 (38.7%) genes (**Supplementary**  
282 **Figure 23, Supplementary Table 14**). Agreement improved when the same SNP instrument  
283 was compared between studies, but discordance still remained high with 1,891 (26%) out of  
284 7,274 *MetaBrain* Wald ratios showing opposite directionality to eQTLGen (**Supplementary**  
285 **Table 15**). The notable discordance in the directionality of the blood and brain eQTLs  
286 underscore the importance of tissue-specific differences when interpreting transcriptomics data.  
287  
288 Of the 135 genes with MR findings in Cortex-EUR for MS, there were 28 genes without a  
289 significant eQTLGen instrument, including 3 genes (*SLC12A5*, *CCDC155* and *MYNN*) for which  
290 we found both MR significance and colocalization in *MetaBrain* (**Supplementary Note;**  
291 **Supplementary Table 16**. Comparing blood and brain gene expression levels for these genes in  
292 GTEx, *SLC12A5* had almost no expression in blood, while expression was comparable between  
293 tissues for *CCDC155* and *MYNN* (**Supplementary Note, Supplementary Figure 24**). The  
294 discrepancy in MR findings observed between Cortex-EUR and eQTLGen suggest tissue-  
295 dependent genetic effects for MS.

296

### 297 **MR and colocalization analysis links multiple sclerosis GWAS loci to cell type specific** 298 **eQTLs for *CYP24A1* and *CLECL1***

299 Two MS genes, *CYP24A1* and *CLECL1*, showed cell type specific *cis*-eQTLs (**Figure 5C and**  
300 **D**). Another gene that was previously suggested to be neuron specific<sup>38</sup>, *SLC12A5*, did not show  
301 a significant ieQTL in our data. Our analysis used rs2259735 as the Cortex-EUR eQTL

302 instrument variable and suggested that higher expression of *CYP24A1* is associated with  
303 increased MS risk (MR Wald ratio=0.13,  $p=1.7\times 10^{-9}$ ). We also observed colocalization of the  
304 *cis*-eQTL and the MS GWAS signal at this region (coloc PP4=0.99), suggesting the same  
305 underlying genetic signal. Furthermore, ieQTL analysis showed increasing expression of  
306 *CYP24A1* with increasing neuronal proportions for the MS risk allele rs2248137 (interaction  
307 beta=2.85; interaction FDR= $1\times 10^{-308}$ ; **Figure 5C**). Rs2248137 has previously been associated  
308 with MS<sup>39</sup> and is in strong LD with SNP rs2259735 ( $r^2=0.9$ ). *CYP24A1* is a mitochondrial  
309 cytochrome P450 hydroxylase that catalyzes the inactivation of 1,25-dihydroxyvitamin D<sub>3</sub>  
310 (calcitriol), the active form of vitamin D<sup>40</sup>. Loss of function mutations in *CYP24A1* increase  
311 serum calcitriol and cause hereditary vitamin D-mediated PTH-independent hypercalcemia<sup>41,42</sup>.  
312 In the brain, vitamin D plays vital functions in regulating calcium-mediated neuronal  
313 excitotoxicity, reducing oxidative stress and regulating synaptic activity<sup>43</sup>. Epidemiological  
314 studies have proposed vitamin D deficiency as a risk factor for MS<sup>44,45</sup>, which has recently been  
315 validated through MR<sup>46-48</sup>. Our findings are consistent with a previous report of a shared MS  
316 GWAS signal and *CYP24A1 cis*-eQTL signal with frontal cortex but not white matter, using a  
317 brain eQTL dataset derived from expression microarrays to confirm the findings in the same  
318 direction of effect<sup>49</sup>.

319  
320 As another MS signal that passed MR and colocalization, decreased expression of *CLECL1* was  
321 associated with increased MS risk (MR Wald ratio=-0.16,  $p=1.58\times 10^{-9}$ , coloc PP4>0.92). The  
322 ieQTL analysis indicated that the rs7306304 allele increased expression of *CLECL1* with  
323 increasing macrophage proportion (interaction beta=-3.65; interaction FDR= $1\times 10^{-308}$ , **Figure**  
324 **5D**), confirming a previous finding of a microglia cell-type specific *cis*-eQTL for *CLECL1* at this

325 MS risk locus<sup>39</sup>. Rs7306304 is in strong LD with the MS lead SNP, rs7977720 ( $r^2=0.84$ )<sup>39</sup>.  
326 *CLECLI* encodes a C-type lectin-like transmembrane protein highly expressed in dendritic and B  
327 cells that has been proposed to modulate immune response<sup>50</sup>. *CLECLI* was previously found to  
328 be lowly expressed in cortical bulk RNA-seq data, while having a 20-fold higher expression in a  
329 purified microglia dataset<sup>39</sup>, suggesting that decreased *CLECLI* expression increases MS  
330 susceptibility through microglia-mediated dysregulation of immune processes in the brain.

331

### 332 ***MetaBrain* allows for the identification of *trans*-eQTLs**

333 *Trans*-eQTL analysis can identify the downstream transcriptional consequences of disease  
334 associated variants. However, we have previously observed in blood that *trans*-eQTL effect-sizes  
335 are usually small. Here we studied whether this applies to brain as well. In order to maximize  
336 sample size and statistical power, we performed a *trans*-eQTL analysis in 3,111 unique  
337 individuals. We reduced the number of tests performed by limiting this analysis to 130,968  
338 unique genetic variants: these include variants that have been previously found to be associated  
339 with diseases and complex traits through GWAS and variants that were primary, secondary,  
340 tertiary or quaternary lead *cis*-eQTL SNPs from any of the aforementioned discovery datasets.

341

342 We identified 3,940 *trans*-eQTLs (FDR<0.05), of which 2,589 (66%) were significant after  
343 removing *trans*-eQTLs for which the gene that partially map within 5Mb of the *trans*-eQTL SNP  
344 **(Supplementary Note; Figure 6A; Supplementary Table 17)**. These 2,589 eQTLs reflect 373  
345 unique SNPs, and 1,263 unique genes. 222 (60%) of the *trans*-eQTL SNPs were a *cis*-eQTL  
346 SNP, of which 42 (19%) were a *cis*-eQTL index SNP in Cortex-EUR, and 22 (10%) in tissues

347 other than cortex. This suggests that *trans*-eQTLs can also be observed for *cis*-eQTLs index  
348 SNPs identified in other tissues (**Supplementary Table 17**).

349

350 1,060 (83%) of the observed *trans*-eQTL genes were affected by 3 variants at 7p21.3  
351 (rs11974335, rs10950398 and rs1990622, LD  $r^2 > 0.95$ ; **Figure 6A and B; Supplementary Table**  
352 **17**). This locus is associated with several brain-related traits, including frontotemporal lobar  
353 degeneration<sup>51</sup> and major depressive disorder<sup>52</sup> (**Supplementary Table 17**). The *trans*-eQTL  
354 SNP rs1990622 in this locus is the lead GWAS SNP for the TDP-43 subtype of frontotemporal  
355 lobar degeneration (FTLD-TDP)<sup>53</sup>, just downstream of *TMEM106B*. Matching previous  
356 reports<sup>54,55</sup>, we observed that this locus was associated with predicted neuron proportions  
357 (**Supplementary Tables 18-20**). Moreover, the predicted neuronal proportions were lower in  
358 AD cases than controls (**Supplementary Figure 25**), which may explain why a large number of  
359 *trans*-eQTLs signals at this region were most pronounced in the AMP-AD datasets and had  
360 stronger effect sizes in AD samples (**Supplementary Figure 26 and 27**). We performed  
361 functional enrichment on the *trans*-eQTL genes using g:Profiler<sup>56</sup> and observed that upregulated  
362 *trans*-eQTL genes were enriched for neuron related processes such as synaptic signaling  
363 ( $p=1.3 \times 10^{-28}$ ) and nervous system development ( $p=2.9 \times 10^{-21}$ ). Downregulated genes were  
364 enriched for gliogenesis ( $p=1.6 \times 10^{-8}$ ) and oligodendrocyte differentiation ( $p=3.1 \times 10^{-6}$ ;  
365 **Supplementary Table 21**). Surprisingly, 21 of these *trans*-eQTLs were also significant (BH  
366 FDR<0.05) in the snRNA-seq data of excitatory neurons with 100% allelic concordance  
367 (**Supplementary Figure 28; Supplementary Table 22**), suggesting that some of these *trans*-  
368 eQTLs might not be driven by differences in neuron proportions. A detailed description of this  
369 locus can be found in the **Supplementary Note**.



370

371 We observed *trans*-eQTLs from multiple independent genomic loci for 14 genes, suggesting  
372 convergent *trans*-eQTL effects (**Supplementary Table 17**). The genes with these convergent  
373 *trans*-eQTL effects were previously associated with immunological phenotypes (*HBG2*, *PIWIL2*,  
374 and *SVEP1*), brain-related phenotypes (*DAZAP2*), immunological and brain-related phenotypes  
375 (*HMCEs*, *KCNA5*, *MBTPS1*, *PRPF19*, *PTH2R* and *RFPL2*) or other phenotypes (*ANKRD2*,  
376 *PEX12*, *PROM1* and *ZNF727*).

377

378 Encouragingly, some of these convergent *trans*-eQTLs have already been previously identified  
379 in blood. For example, two independent variants (rs1427407 on 2p16.1 and rs4895441 on  
380 6q23.3) affected hemoglobin subunit gamma-2 (*HBG2*) on 11p15.4 in *trans* (**Figure 6C**). These  
381 variants have previously been associated with fetal hemoglobin levels<sup>57-59</sup> and various blood cell  
382 counts.

383

384 We also observed converging effects that were not identified in blood. For instance, *KCNA5*  
385 (12p13.32) was affected by variants from three independent loci at 2p23.3 (rs930263), 4p15.32  
386 (rs2702575 and rs2604551) and 7p21.3 (rs10950398 and rs11974335) as described in **Figure**  
387 **6C; Supplementary Table 17**. *KCNA5* encodes the potassium voltage-gated channel protein  
388 Kv1.5. Potassium voltage-gated channels regulate neuron excitability among other functions, and  
389 blockers for these channels have been suggested as a therapeutic target for multiple sclerosis  
390 patients<sup>60</sup>. Furthermore, *KCNA5* has previously been associated with cardiovascular disease<sup>61</sup>,  
391 and has been suggested to modulate macrophage and microglia function<sup>62</sup>. Three *cis*-eQTLs  
392 were associated with rs930263, including *ADGRF3*, *DRC1*, and a secondary eQTL on *HADHB*.

393 rs930263 was previously associated with sleep dependent LDL levels<sup>63</sup> and several blood  
394 metabolite levels<sup>64-67</sup>. The 4p15.32 locus was previously associated with insomnia and adult  
395 height<sup>68</sup> and the 7p21.3 locus with depression and blood protein levels. These results thus  
396 suggest that several sleep related variants affect potassium voltage-gated regulation of neuron  
397 excitability.

398

399 This is the first report of *trans*-eQTLs in the brain cortex for many of the variants identified, and  
400 our results indicate that many of these signals are brain-specific. We observed the *trans*-eQTL  
401 effect-sizes in brain are usually small, similar to what we previously observed in blood,  
402 emphasizing the importance of increasing the sample-size of brain eQTL studies.

403

#### 404 **Brain co-regulation networks improve GWAS interpretation**

405 We generated brain-region specific co-regulation networks based on the RNA-seq data from  
406 8,544 samples (**Supplementary Note, Supplementary Figures 29-30**). We previously have  
407 done this for a heterogenous set of RNA-seq samples spanning across all available tissue types  
408 and cell lines (n=31,499)<sup>69,70</sup>, which showed that such a co-regulation network can be  
409 informative for interpreting GWAS studies<sup>69</sup> and helpful in the identification of new genes that  
410 cause rare diseases<sup>70</sup>.

411

412 We applied a new approach (*'Downstreamer'*, in preparation, see **Supplementary Note**) that  
413 improves upon DEPICT, our previously published post-GWAS pathway analysis method<sup>69</sup>.  
414 *Downstreamer* can systematically determine which genes are preferentially co-regulated with  
415 genes that reside within GWAS loci. It does not use a significance threshold for a GWAS, but

416 instead uses all SNP information. In addition, *Downstreamer* accounts for LD and uses rigorous  
417 permutation testing to determine significance levels and control for Type I errors.

418

419 We applied *Downstreamer* to schizophrenia (SCZ)<sup>71</sup>, PD<sup>72</sup>, MS<sup>37</sup>, AD<sup>73</sup> and ALS GWAS  
420 summary statistics (**Supplementary Table 23-27**), using three different brain-derived co-  
421 regulation networks: one based on all 8,544 brain samples, one limited to 6,527 cortex samples  
422 and one limited to 715 cerebellum samples. We observed that there were multiple sets of genes  
423 that showed strong co-regulation with genes inside the GWAS loci for these diseases. For MS  
424 and AD, these were mostly immune genes, whereas for PD, ALS and SCZ these were genes that  
425 are specifically expressed in brain (**Supplementary Table 23-27**).

426

427 For ALS, we applied *Downstreamer* to summary statistics from a recent meta-analysis in  
428 individuals from European ancestry (**Supplementary Table 28**), and a trans-ethnic meta-  
429 analysis including European and Asian individuals (EUR+ASN; **Supplementary Table 23**; van  
430 Rheenen *et al.*, manuscript in preparation). To look for contributions of non-neurological cell  
431 types and tissues, we first used the previously published heterogenous network<sup>70</sup> that comprises  
432 many different tissues and cell types, but did not identify genes that were significantly enriched  
433 for co-regulation with genes inside ALS loci. However, when we applied our method to the  
434 different brain co-regulation networks, we identified a set of 27 unique co-regulated genes  
435 (EUR+ASN summary statistics; **Figure 7A**; **Supplementary Table 23**), depending on the type  
436 of brain co-regulation network used. *HUWE1* was shared between the brain and cortex co-  
437 regulation network analysis, while *UBR4* was shared between the cortex and cerebellum  
438 analysis. *UBR4* is a ubiquitin ligase protein expressed throughout the body. A private *UBR4*

439 mutation, segregated with episodic ataxia in a large three-generation Irish family, implicates its  
440 role in muscle coordination<sup>74</sup>. *UBR4* interacts with the Ca<sup>2+</sup> binding protein, calmodulin and Ca<sup>2+</sup>  
441 dysregulation has been linked to proteins encoded by ALS disease genes and motor neuron  
442 vulnerability<sup>75</sup>. We observed in the *Downstreamer* findings that many of these prioritized genes  
443 are co-regulated with each other (**Figure 7B**), and using our recently developed clinical symptom  
444 prediction algorithm<sup>70</sup>, there was an enrichment of genes implicated in causing gait disturbances  
445 (**Figure 7C**). These genes are associated with ALS (highlighted in blue), brain-related disorders  
446 (including *DNAJC5*, *HTT*, *HUWE1*, *TSC1* and *YEATS2*) or muscle-related disorders (including  
447 *KMT2B*). While various loci have been identified for both familial and sporadic forms of ALS,  
448 the function of the positional candidate genes within these loci is still unclear. Our  
449 *Downstreamer* analysis identified genes that show strong coregulation with positional candidate  
450 genes inside ALS loci, suggesting that these positional candidates must have a shared biological  
451 function.

452

453 For MS, the heterogeneous network, including many blood and immune cell type samples,  
454 identified 257 unique genes that showed significantly enriched co-regulation with genes inside  
455 MS loci (**Figure 7D; Supplementary Table 27**), and many were immune genes, which is also  
456 expected for this disease. However, when we applied the brain co-regulation networks, we  
457 identified a much smaller set of genes, and these genes showed strong enrichment for genes  
458 involved in the neurotrophin signaling pathway (**Figure 7E and F**). Neurotrophins are  
459 polypeptides secreted by immunological cell types. In the brain, neurotrophin concentrations are  
460 important to promote the survival and proliferation of neurons as well as synaptic transmission.  
461 In MS patients, neurotrophin reactivity is higher in MS plaques, whereby neurotrophins are

462 released by peripheral immune cells directly to the inflammatory lesions, suggesting a protective  
463 role of this signaling process<sup>76,77</sup>. Neutrophins are also released by glial cells in the brain,  
464 including microglia and astrocytes, and their role in stimulating neuronal growth and survival  
465 could also contribute to an overall neuroprotective effect<sup>78</sup>. In the heterogeneous network, we  
466 observed high expression for these genes in immune-related tissues (**Supplementary Figure**  
467 **31A**), supporting the “outside-in hypothesis” that the immune system may be a potential trigger  
468 for MS<sup>37,79</sup>. The brain specific network showed high expression in spinal cord and cerebellum  
469 but lower expression in cortex samples (**Supplementary Figure 31B**), which could be  
470 highlighting the specific biological processes taking place in these CNS regions that lead to  
471 disease. For example, the cerebellum is responsible for muscle coordination and ataxia occurs in  
472 approximately 80% of MS patients with symptoms<sup>80</sup>. We speculate that both dysregulation of the  
473 immune system and dysregulation of certain neurological processes is a prerequisite for  
474 developing MS.

475

## 476 **Discussion**

477 We here describe an integrated analysis of the effects of genetic variation on gene expression  
478 levels in brain in over 3,000 unique individuals. This sample size yielded sufficient statistical  
479 power to identify robust *cis*-eQTLs and to our knowledge for the first-time brain *trans*-eQTLs  
480 that emanate from SNPs previously linked to neurodegenerative or psychiatric diseases.

481

482 We compared *cis*-eQTLs in *MetaBrain* to *cis*-eQTLs in eQTLGen from a set of 31,684 blood  
483 samples. We observe a large proportion of shared *cis*-eQTLs between brain and blood, most of  
484 which have the same allelic direction of effect. Our analysis also permitted us to identify *cis*-

485 eQTL effects that are independent of the primary *cis*-eQTLs. Some of these independent effects  
486 reflect SNPs that are also the index variants for several neurological and psychiatric disorders,  
487 making them particularly interesting for subsequent follow-up. Recent observations have  
488 revealed that SNPs with the strongest *cis*-eQTL effects are depleted for GWAS associations<sup>81</sup>.  
489 Thus, secondary, tertiary or quaternary *cis*-eQTL SNPs could potentially be even more  
490 interesting to follow-up than certain primary *cis*-eQTL SNPs to link association signals to  
491 function.

492  
493 We studied different regions in the brain, permitting us to identify brain-region specific eQTLs.  
494 For this, to exclude spurious differences that may arise from different cell type proportions  
495 across brain regions, we first inferred cell type percentages for the major brain cell types. We  
496 then applied an eQTL interaction model (i.e., using the cell type percentage x genotype as  
497 interaction term), permitting us to identify 1,515 *cis*-eQTLs that show cell type specificity. Most  
498 of these cell type dependent effects were observed for oligodendrocytes and neurons, the two  
499 most common cell types in the brain for which statistical power to observe such effects was the  
500 strongest. Still, we could identify 461 cell type dependent eQTLs also for macrophages,  
501 endothelial cells, or astrocytes. While we found strong concordance with immunohistochemistry  
502 results, our findings are largely based on a deconvolution approach, which in future studies will  
503 benefit from validation in purified cell types, e.g. using population-based single-cell RNA-seq  
504 datasets as they are now becoming available<sup>82,83</sup>. Such single-cell eQTL studies can gain  
505 substantial statistical power by limiting analyses to the large set of primary, secondary, tertiary  
506 and quaternary *cis*-eQTLs our study reveals for bulk brain samples.

507

508 To our knowledge, this is the best powered Mendelian randomization and colocalization analysis  
509 using brain *cis*-eQTLs as instruments for bipolar disease, epilepsy, frontotemporal dementia,  
510 multiple sclerosis, cognitive function and years of schooling GWAS outcomes. Interestingly,  
511 also for schizophrenia three signals for *CILP2*, *MAU2* and *TM6SF2* met our criteria that had not  
512 been reported in a recent psychiatric genomics consortium study<sup>84</sup>, further emphasizing the value  
513 of our well-harmonized, large eQTL data set in the tissue type of interest (**Supplementary**  
514 **Note**). Our results also identify increased *CYP24A1* expression as associated with multiple  
515 sclerosis risk and propose neurons as the most susceptible cell type to *CYP24A1* expression  
516 changes and likely active vitamin D levels. The potentially novel role of *CYP24A1* in brain could  
517 play an important role in MS etiology, as may lowered expression of *CLECL1* in microglia.

518  
519 The 2,589 identified *trans*-eQTLs allowed us to gain insights into downstream molecular  
520 consequences of several disease-associated genetic variants. Our *trans*-eQTL analysis focused on  
521 a single brain region and SNPs with a known interpretation (i.e. trait-associated variants and *cis*-  
522 eQTL SNPs). We therefore expect that a genome-wide approach will identify many more *trans*-  
523 eQTLs. 2,218 of the *trans*-eQTLs were located in a 7p21.3 locus and the genes were strongly  
524 correlated with neuron proportions, indicating that cell type proportions can heavily impact  
525 *trans*-eQTL identification. However, 21 of these *trans*-eQTLs replicated in snRNA-seq data,  
526 suggesting that some of these *trans*-eQTLs may also exist in single cells. Excluding the 7p21.3  
527 locus, we identified 371 *trans*-eQTLs located elsewhere in the genome, which are less likely due  
528 to neuron proportion differences. For several neurological and psychiatric conditions, our  
529 analyses indicate pathways that may help to elucidate disease causes and putative intervention  
530 points for future therapies.

531  
532 We used the brain-specific co-regulation networks to study several brain-related GWAS studies,  
533 with the aim to prioritize genes that show significantly enriched co-regulation with genes inside  
534 the associated GWAS loci. For ALS this revealed a limited, but significant set of genes which do  
535 not map within associated ALS loci, but that link genes within multiple ALS loci. Follow-up  
536 research on these prioritized genes might therefore help to better understand the poorly  
537 understood causal pathways that cause ALS. While it is tempting to speculate that these  
538 prioritized genes might represent genes that could serve as potential targets for pharmaceutical  
539 intervention, follow-up research is needed in order to establish whether these genes play a  
540 relevant role in ALS.

541  
542 Our study had several limitations. For instance, we performed single tissue eQTL analyses that  
543 were limited to a single RNA-seq sample per individual, excluding many RNA-seq samples from  
544 the analysis. A joint analysis across tissues, including multiple RNA-seq samples per individual  
545 using for example random effects models would further improve power<sup>85,86</sup>, which would be  
546 especially useful for the future identification of *trans*-eQTLs. Additionally, LD overlap analysis,  
547 Mendelian randomization and colocalization are sensitive to many factors, including eQTL and  
548 GWAS study sample size, effect size, variant density, LD structure and imputation quality.  
549 Differences between study designs may consequently influence the results of such analyses. For  
550 example, our colocalization and LD overlap analysis did not include the *MAPT* gene for  
551 Alzheimer's disease. The effect sizes of the *cis*-eQTLs for this gene were limited in our study,  
552 since our alignment strategy could not account for the different long-range haplotypes in this  
553 locus causing the H1/H2 haplotype separating SNP rs8070723 to have a p-value of 0.2



554 **(Supplementary Note)**. We note that this might be an issue for other genes as well. Future  
555 studies using graph-based alignment tools or long read sequencing methods would be required to  
556 ultimately determine the true effects on such genes. Our approach combined Mendelian  
557 randomization and colocalization, as it is possible for the *cis*-eQTL instrument to coincidentally  
558 share association with the GWAS trait due to surrounding LD patterns in the genomic region.  
559 We opted to perform single SNP MR because other approaches, such as inverse variance  
560 weighted<sup>87</sup> (IVW) MR, pool the estimates across many SNP instruments, which for many genes  
561 were not available. Potentially, methods such as IVW could be applied to our dataset in the  
562 future when genome-wide *trans*-eQTL analysis would identify many more independent  
563 instruments per gene. However, MR analyses using QTLs could be susceptible to confounding  
564 because of horizontal pleiotropy<sup>88</sup>, where a single gene is affected by multiple indirect effects,  
565 which is likely to be exacerbated by including *trans*-eQTLs. Our colocalization analysis used a  
566 more lenient posterior probability (PP4) threshold of >0.7, which we selected because we  
567 performed colocalization only in loci having a significant MR signal, limiting potential false  
568 positives. However, our colocalization approach assumed the presence of a single association in  
569 each locus, which might not be optimal for *cis*-eQTL loci harboring multiple independent  
570 variants, such as for the *TREM2* gene **(Supplementary Note)**. Consequently, our approach may  
571 have not detected colocalizing signals in some loci. Recently, colocalization methods were  
572 published<sup>89</sup> that do not have this assumption, and consequently may improve future  
573 colocalization results.

574

575 With the numbers of GWAS loci for brain-related traits and diseases steadily climbing, we  
576 expect that our resource will prove itself as a highly valuable toolkit for post-GWAS brain

577 research and beyond. Among others, we demonstrate how our dataset can be utilized to  
578 disambiguate GWAS loci, point to causal pathways and prioritize targets for drug discovery. To  
579 our knowledge, this is the largest non-blood eQTL analysis ever conducted, providing insights  
580 into the functional consequences of many disease associated variants. We expect that through  
581 future integration with single-cell eQTL studies that have higher resolution but lower power, our  
582 results will help to pinpoint transcriptional effects in specific brain cell types for many disease-  
583 associated genetic variants.

584

## 585 **Methods**

### 586 **Dataset collection and description**

587 We collected human brain bulk RNA-seq datasets from different resources. Briefly, we collected  
588 previously published samples from the AMP-AD consortium<sup>6</sup> (AMP-AD MAYO<sup>6</sup>, ROSMAP<sup>6</sup>  
589 and MSBB<sup>6</sup>), Braineac<sup>7</sup>, the PsychENCODE consortium<sup>8</sup> (Bipseq<sup>4</sup>, BrainGVEX<sup>4</sup>, CMC<sup>9</sup>, GVEX,  
590 and UCLA\_ASD<sup>4</sup>) from Synapse.org using the Python package synapseclient<sup>90</sup>. The NABEC and  
591 GTEx datasets were retrieved from NCBI dbGaP, and TargetALS data was provided directly by  
592 the investigators. For an overview of the number of samples per dataset, see **Supplementary**  
593 **Table 1**.

594

595 Additionally, we collected public brain bulk RNA-seq samples from the European Nucleotide  
596 Archive (ENA; **Supplementary Table 28**). To select only the brain samples, we first  
597 downloaded the SkyMap database<sup>91</sup>, which provides readily mapped read counts and sample  
598 annotations. We performed rigorous quality control on this dataset, and selected ENA, excluding  
599 for example brain cell lines, brain cancer samples, and samples with RNA spike ins (See  
600 **Supplementary Note** for more details on this method, **Supplementary Figure 1**), resulting in  
601 1,759 samples, and 9,363 samples when combined with the previously published datasets  
602 (**Supplementary Table 1**).

603

### 604 **RNA-seq data**

605 RNAseq data was processed using a pipeline built with molgenis-compute<sup>92</sup>. FASTQ files were  
606 aligned against the GENCODE<sup>93</sup> v32 primary assembly with STAR<sup>94</sup> (version 2.6.1c), while  
607 excluding patch sequences (see **Supplementary Note**) with parameter settings:

608 outFilterMultimapNmax = 1, twopassMode Basic, and outFilterMismatchNmax = 8 for paired-  
609 end sequences, outFilterMismatchNmax = 4 for single-end sequences. Gene quantification was  
610 performed by STAR, similar to gene quantification using HTSeq<sup>95</sup> with default settings. The  
611 gene counts were then TMM<sup>96</sup> normalized per cohort using edgeR<sup>97</sup> (version 3.20.9) with R<sup>98</sup>  
612 (version 3.5.1).

613

614 To measure FASTQ and alignment quality we used FastQC<sup>99</sup> (version 0.11.3), STAR metrics, and  
615 Picard Tools<sup>100</sup> (version 2.18.26) metrics (MultipleMetrics, and RNAseqMetrics). Samples were  
616 filtered out if aligned reads had <10% coding bases (**Supplementary Figure 3A**), <60% reads  
617 aligned (**Supplementary Figure 3B**), or <60% unique mapping. 117 of the RNA-seq samples  
618 did not pass this filter, mostly from GTEx<sup>97</sup>. The other quality measurements were visually  
619 inspected but contained no outliers.

620

621 RNA-sequencing library preparation, and other technical factors can greatly influence the ability  
622 to quantify of gene expression. Therefore, for a given sample such factors often influence the  
623 total variation. For example, such issues can be caused by problems during RNA-seq library  
624 preparation that led to an increased number of available transcripts to quantify, or conversely, a  
625 lack of variation in quantified transcripts (compared to other samples in the dataset). We  
626 therefore opted to identify RNA-seq outliers that were not explained by poor RNA-seq alignment  
627 metrics. For this purpose, we performed PCA on the RNA data prior to normalization: we  
628 reasoned that the first two components capture excess or depletion of variation caused by  
629 technical problems. We identified 20 samples that were outliers in the PCA plot of the RNA-seq  
630 data, where PC1 was more than 4 standard deviations from the mean (**Supplementary Figure**

631 **3A**). Twenty outlier samples were removed and the principal components were recalculated  
632 (**Supplementary figure 3B**). We detected and removed 45 additional outlier samples. We  
633 confirmed no additional outlier samples in the third iteration and principal component  
634 calculation, (**Supplementary Figure 3C**) and 8,868 samples were taken through additional QC.  
635  
636 We next removed genes with no variation and then log<sub>2</sub>-transformed, quantile normalized and  
637 Z-score transformed the RNA-seq counts per sample. PCA on the normalized expression data  
638 showed that datasets strongly cluster together (**Supplementary Figure 4A**), likely due to dataset  
639 specific technical differences (e.g., single-end versus paired-end sequencing). To correct for this,  
640 the normalized expression data was correlated against 77 covariates from different QC tools  
641 (FastQC<sup>99</sup>, STAR<sup>94</sup>, and Picard Tools<sup>100</sup>), such as percent protein coding, GC content, and 5'  
642 prime/3' prime bias. The top 20 correlated technical covariates (% coding bases, % mRNA bases,  
643 % intronic bases, median 3' prime bias, % usable bases, % intergenic bases, % UTR bases, %  
644 reads aligned in pairs, average mapped read length, average input read length, number of  
645 uniquely mapped reads, % reads with improper pairs, number of reads improper pairs, total  
646 sequences, total reads, % chimeras, number of HQ aligned reads, number of reads aligned, HQ  
647 aligned Q20 bases, HQ aligned bases) were regressed out of the expression data using a linear  
648 model. After covariate correction, clustering of datasets in PC1 and PC2 were no longer present  
649 (**Supplementary Figure 4B**).  
650  
651 Our collection of RNA-seq samples consisted of 36 different tissue labels, many of which were  
652 represented by only a few samples. Therefore, we next defined major brain regions present in our  
653 dataset, including samples from amygdala, basal ganglia, cerebellum, cortex, hippocampus and

654 spinal cord. We noted that some samples (especially from ENA) were not annotated with a  
655 specific major brain region. To resolve this, we performed PCA over the sample correlation  
656 matrix and then performed k-nearest neighbors on the first two PCs (k=7) to classify samples to  
657 the major brain regions. Using this approach, we defined a set of 86 amygdala, 574 basal ganglia,  
658 723 cerebellum, 6,601 cortex, 206 hippocampus, 252 hypothalamus and 285 spinal cord samples  
659 (**Supplementary Table 1, Figure 2A**).

660

### 661 **Genotype data and definition of eQTL datasets**

662 The genotype data for the included datasets was generated using different platforms, including  
663 genotypes called from whole genome sequencing (WGS; AMP-AD, TargetALS<sup>12</sup>, GTE<sup>3</sup>),  
664 genotyping arrays (NABEC<sup>11</sup>, Braineac<sup>7</sup>), and haplotype reference consortium (HRC)<sup>101</sup> imputed  
665 genotypes (PsychENCODE datasets), or were called from RNA-seq directly (ENA dataset; see  
666 **Supplementary Note**). In total, 22 different genotyping datasets were available, reflecting 6,658  
667 genotype samples (**Supplementary Table 1**).

668

669 We performed quality control on each dataset separately, using slightly different approaches per  
670 platform. For the array-based datasets, we first matched genotypes using GenotypeHarmonizer<sup>102</sup>  
671 using 1000 genomes phase 3 v5a (1kpg) as a reference, limited to variants having MAF >1%,  
672 <95% missingness and Hardy-Weinberg equilibrium p-value <0.0001. Genotypes were then  
673 imputed using HRC v1.1 as a reference on the Michigan imputation server<sup>103</sup>. In all HRC  
674 imputed datasets, variants with imputation info score <0.3 were removed. For the WGS datasets,  
675 we removed indels and poorly genotyped SNPs having VQSR tranche <99.0, genotype quality  
676 <20, inbreeding coefficient <-0.3 and >5% missingness, setting genotype calls with allelic depth

677 <10 and allelic balance <0.2 or >0.8 as missing. WGS datasets were not imputed with HRC.

678 Considering the small size of some of the datasets, we decided to focus further analysis on

679 variants with MAF >1% and Hardy-Weinberg p-value >0.0001.

680

681 In each dataset, we removed genetically similar individuals by removing individuals with pi<sub>hat</sub>

682 >0.125, as calculated with PLINK 2.0<sup>104</sup>. Additionally, we merged genotypes with those from

683 1kGP, pruned genotypes with --indep-pairwise 50 5 0.2 in PLINK, and performed PCA on the

684 sample correlation matrix. We performed k-nearest neighbors (k=7) on the first two PCs, using

685 the known ancestry labels in 1kGP, to assign an ancestry to each genotyped sample. The majority

686 of included samples was of EUR descent: 5,138 samples had an EUR assignment, 805 samples

687 had an AFR assignment, and 573 samples were assigned to the other ethnicities (**Supplementary**

688 **Table 1, Figure 2B**).

689

690 For the purpose of eQTL analysis, we next assessed links between RNA-seq and genotype

691 samples and noted that some individuals had multiple RNA-seq samples (e.g. from multiple

692 brain regions) or multiple genotype samples (e.g. from different genotyping platforms). In total,

693 we were able to determine 7,644 links between RNA-seq samples and genotype samples

694 (**Supplementary Table 1**), reflecting 3,525 unique EUR individuals, 624 unique AFR

695 individuals and 510 unique individuals assigned to other ethnicities. We then grouped linked

696 RNA-seq samples based on ethnicity and tissue group to prevent possible biases on eQTL

697 results. For those individuals with multiple linked RNA-seq samples, we selected a sample at

698 random within these groups. Within each tissue and ethnicity group, we then selected unique

699 genotype samples across datasets in such a way to maximize sample size per genotype dataset.

700 For the eQTL analysis per tissue, we only considered those datasets having more than 30 unique  
701 linked samples available, and for which at least two independent datasets were available. Using  
702 these criteria for sample and dataset selection, we were able to create 7 eQTL discovery datasets:  
703 Basal ganglia-EUR (n=208), Cerebellum-EUR (n=492), Cortex-EUR (n=2,970), Cortex-AFR  
704 (n=420), Hippocampus-EUR (n=168) and Spinal cord-EUR (n=108; **Supplementary Table 1,**  
705 **Figure 2C**).

706

### 707 **eQTL analysis**

708 Our dataset consists of different tissues and ethnicities, and samples have been collected in  
709 different institutes using different protocols. Consequently, combining these datasets to perform  
710 eQTL analysis is complicated, due to possible biases each of these factors may introduce. To  
711 resolve this issue, we opted to perform an eQTL meta-analysis within each of the defined eQTL  
712 discovery datasets. To reduce the effect of possible gene expression outliers, we calculated  
713 Spearman's rank correlation coefficients for each eQTL in each dataset separately, and then  
714 meta-analyzed the resulting coefficients using a sample size weighted Z-score method, as  
715 described previously<sup>14</sup>. While we acknowledge that this method may provide less statistical  
716 power than the commonly used linear regression, we chose this method to provide conservative  
717 effect estimates. To identify *cis*-eQTLs, we tested SNPs located within 1 Mb of the transcription  
718 start site, while for the identification of *trans*-eQTLs, we required this distance to be at least 5  
719 Mb. For both analyses, we selected variants having a MAF>1%, and a Hardy-Weinberg p-value  
720 >0.0001. Using the GENCODE v32 annotation, we were able to quantify 58,243 genes, of which  
721 19,373 are protein coding. While non-coding genes have been implicated to be important for  
722 brain function<sup>105</sup>, these genes generally have poor genomic and functional annotations, meaning



723 that it is often unknown in which pathway they function, and that there is uncertainty about their  
724 genomic sequence. We therefore focused our eQTL analyses on protein coding genes.

725

726 To correct for multiple testing, we reperformed the *cis*- and *trans*-eQTL analyses, while  
727 permuting the sample labels 10 times. Using the permuted p-values, we created empirical null  
728 distributions and determined a false discovery rate (FDR) as the proportion of unpermuted  
729 observations over the permuted observations and considered associations with  $FDR < 0.05$  as  
730 significant. To provide a more stringent FDR estimate for our *cis*-eQTL results, we limited FDR  
731 estimation to the top associations per gene, as described previously<sup>14</sup>. We note that our FDR  
732 estimate is evaluated on a genome-wide level, rather than per gene, and consequently FDR  
733 estimates stabilize after a few permutations<sup>106</sup>.

734

735 Since *cis*-eQTL loci are known to often harbor multiple independent associations, we performed  
736 an iterative conditional analysis, where for each iteration, we regressed the top association per  
737 gene from the previous associations, and re-performed the *cis*-eQTL analysis until no additional  
738 associations at  $FDR < 0.05$  could be identified.

739

740 Since a genome-wide *trans*-eQTL analysis would result in a large multiple testing burden  
741 considering the billions of potential tests, we limited this analysis to a set of 130,968 variants  
742 with a known interpretation. This set constituted of variants that were either previously  
743 associated with traits, having a GWAS p-value  $< 5 \times 10^{-8}$  in the IEU OpenGWAS database<sup>107</sup> and  
744 EBI GWAS catalog<sup>108</sup> on May 3<sup>rd</sup>, 2020, and additional neurological traits (see **Supplementary**  
745 **Table 17**) or were showing an association with  $FDR < 0.05$  in any of our discovery *cis*-eQTL

746 analyses (including secondary, tertiary and quaternary associations identified in the iterative  
747 conditional analysis). *Cis*-eQTLs in Cortex-EUR were highly concordant when replicated in  
748 Cortex-AFR (**Figure 3C**). Consequently, to maximize the sample size and statistical power, we  
749 meta-analyzed Cortex-EUR and Cortex-AFR datasets together. However, for the *trans*-eQTL  
750 analysis we omitted ENA, to prevent bias by genotypes called from RNA-seq samples.  
751 Additionally, For the *trans*-eQTL analysis, we did not correct the gene expression data for 10  
752 PCs, since *trans*-eQTLs can be driven by cell proportion differences<sup>17</sup>, and many of the first 10  
753 PCs in the *MetaBrain* dataset were correlated with estimated cell type proportions  
754 (**Supplementary Figure 32**). To test for *trans*-eQTLs, we assessed those combinations of SNPs  
755 and genes where the SNP-TSS distance was >5 Mb, or where gene and SNP were on different  
756 chromosomes. We note that we did not evaluate eQTLs where the SNP-TSS distance was >1 Mb  
757 and <5 Mb, which potentially excludes detection of long-range *cis*-eQTLs or short-range *trans*-  
758 eQTLs. We expect however, that this excludes only a limited number of eQTLs, since we  
759 observed that this distance was <31Kb for 50% of *cis*-eQTLs (**Figure 3B**), indicating most *cis*-  
760 eQTLs are short-ranged. Additionally, we reasoned that the >5 Mb cutoff would prevent  
761 identification of false-positive *trans*-eQTLs due to long-range LD.

762

### 763 **Estimation of cell type proportions and identification of cell type mediated eQTLs**

764 By leveraging cell type specific gene expression collected through scRNA-seq, a bulk tissue  
765 sample can be modelled as a parts-based representation of the distinct cell types it consists of. In  
766 such a model, the weights of each part (i.e. cell type proportions) can be determined by  
767 deconvolution. In the deconvolution of the *MetaBrain* bulk expression data we used a single-cell  
768 derived signature matrix including the five major cell types in the brain: neurons,

769 oligodendrocytes, macrophages, endothelial cells and astrocytes. This signature matrix was  
770 generated in the context of the CellMap project (Zhengyu Ouyang *et al.*; manuscript in  
771 preparation). In short, we created pseudo-bulk expression profiles by extracting gene expression  
772 values for specific cell types of interest from annotated single cell and single nuclei expression  
773 matrices. Using differential expression analysis and applying several rounds of training and  
774 testing, we selected 1,166 differentially expressed genes and calculated the average read counts  
775 per cell type. We then filtered out genes that had no variation in expression, leaving a total of  
776 1,132 genes. We extracted the corresponding TMM normalized gene counts of these signature  
777 genes for all European cortex samples in *MetaBrain*. After correcting the counts for cohort  
778 effects using OLS, but not for any other technical covariates, we applied log<sub>2</sub> transformation on  
779 both the signature matrix as well as the bulk gene count matrix. Subsequently we applied non-  
780 negative least squares (NNLS)<sup>109</sup> using SciPy (version 1.4.1)<sup>110</sup> to model the bulk expression as a  
781 parts-based representation of the single-nucleus derived signature matrix. First introduced by  
782 Lawson and Hanson<sup>109</sup>, NNLS method is the basis of numerous deconvolution methods to date.  
783 In short, NNLS attempt to find a non-negative weight (coefficient) for each of the cell types that,  
784 when summed together, minimizes the least-squares distance to the observed gene counts.  
785 Lastly, we transformed the resulting coefficients into cell type proportions by dividing them over  
786 the sum of coefficients for each sample. The resulting cell proportions are then used to identify  
787 cell type mediated eQTL effects. For this we applied Decon-eQTL<sup>22</sup> (version 1.4; default  
788 parameters) in order to systematically test for significant interaction between each cell type  
789 proportion and genotype, while also controlling for the effect on expression of the other cell  
790 types. The resulting p-values are then correct for multiple testing using the Benjamini-Hochberg  
791 method on a per-cell-type basis.

792

### 793 **Cell type specific ROSMAP single-nucleus datasets**

794 In order further confirm cell type specific eQTL effects, we used the ROSMAP single-nucleus  
795 data, encompassing 80,660 single-nucleus transcriptomes from the prefrontal cortex of 48  
796 individuals with varying degrees of Alzheimer's disease pathology<sup>111</sup>. We used Seurat version  
797 3.2.2<sup>112</sup> to analyze the data. First, we removed the genes that did not pass filtering as described  
798 previously<sup>111</sup>, leaving us with 16,866 genes and 70,634 cells for further analysis. After this, we  
799 normalized the expression matrix on a per individual per cell type basis using `sctransform`<sup>113</sup> and  
800 visualized the normalized expression matrix using UMAP dimensionality reduction<sup>114</sup>. We  
801 observed that cell types, as defined by Mathys *et al*<sup>115</sup>., for the majority cluster together  
802 (**Supplementary Figures 33 and 34**). We then created expression matrices for each broad cell  
803 type (excitatory neurons, oligodendrocytes, inhibitory neurons, astrocytes, oligodendrocyte  
804 precursor cells, microglia, pericytes and endothelial cells) by calculating the average expression  
805 per gene and per individual basis. We then used these cell-type datasets for eQTL mapping using  
806 the same procedure as the bulk data. To correct for multiple testing, we confined the analysis to  
807 only test for primary *cis*- and *trans*-eQTLs found in *MetaBrain* cortex, while also permuting the  
808 sample labels 100 times. Lastly, we calculated the Spearman correlation between gene  
809 expression levels and genotypes and their 95% confidence intervals<sup>116</sup>.

810

### 811 **Single SNP Mendelian Randomization analysis**

812 Mendelian Randomization (MR) was conducted between the Cortex-EUR eQTLs and 31  
813 neurological traits (21 neurological disease outcomes, 2 quantitative traits and 8 brain volume  
814 outcomes) (**Supplementary Table 11**). Cortex-EUR eQTLs at genome-wide significant

815 ( $p < 5 \times 10^{-8}$ ) were selected and then LD clumped to obtain independent SNPs to form our set of  
816 instruments. LD clumping was carried out using the `ld_clump()` function in the `ieugwasr`  
817 package<sup>117</sup> on the default settings (10,000 Kb clumping window with  $r^2$  cut-off of 0.001 using  
818 the 1000 Genomes EUR reference panel). SNP associations for each of the eQTL instruments  
819 were then looked up in the outcome GWASs of interest. If the SNP could not be found in the  
820 outcome GWAS using a direct lookup of the dbSNP rsid, then a proxy search was performed to  
821 extract the next closest SNP available in terms of pairwise LD, providing minimum  $r^2$  threshold  
822 of 0.8 with the instrument. Outcome GWAS lookup and proxy search was performed using the  
823 `associations()` function in the `ieugwasr` package. To ensure correct orientation of effect alleles  
824 between the eQTL instrument and outcome GWAS associations, the SNP effects were  
825 harmonized using the `harmonise_data()` function in `TwoSampleMR`<sup>87</sup>. Action 2 was selected  
826 which assumes that the alleles are forward stranded in the GWASs (i.e. no filtering or re-  
827 orientation of alleles according to frequency was conducted on the palindromic SNPs). Single  
828 SNP MR was then performed on the harmonized SNP summary statistics using the  
829 `mr_singlesnp()` function in `TwoSampleMR`. Single SNP MR step computes a Wald ratio, which  
830 estimates the change in risk for the outcome per unit change in gene expression, explained  
831 through the effect allele of the instrumenting SNP. We reported all the MR findings that passed a  
832 p-value threshold of  $5 \times 10^{-5}$ , but note that the Bonferroni-corrected  $p=0.05$  threshold for multiple  
833 testing correction is  $p=1.865 \times 10^{-7}$ . We did not implement multi-SNP analysis (such as the  
834 Inverse Variance Weighted method), because there are a small number of instrumenting SNPs  
835 available per gene, which could result in unreliable pooled MR estimates for genes.  
836

837 **Colocalization**

838 Following the MR analysis, colocalization analysis was performed on the MR findings that  
839 passed the suggestive threshold to determine if the eQTL and trait shared the same underlying  
840 signal. We ran colocalization<sup>36</sup> using both the default parameters ( $p1=p2=10^{-4}$  and  $p12=10^{-5}$ ) and  
841 parameters based on the number of SNPs in the region ( $p1=p2=1/(\text{number of SNPs in the region})$   
842 and  $p12=p1/10$ ). We considered the two traits, eQTL and GWAS outcome to colocalize if either  
843 of the two parameters yielded  $PP4>0.7$ . Additionally, colocalization was systematically analyzed  
844 against one trait to compare to robustness of the Cortex-EUR eQTLs with existing cortex eQTL  
845 data sets (see **Supplementary Note**).

846

## 847 **URLs**

848 **Picard:** <http://broadinstitute.github.io/picard/>

849 **dbGAP:** <https://dbgap.ncbi.nlm.nih.gov>

850 **European Nucleotide Archive:** <http://www.ebi.ac.uk/ena>

851 **ieugwasr package:** <https://mrcieu.github.io/ieugwasr/>

852 **TwoSampleMR:** <https://mrcieu.github.io/TwoSampleMR/>

853

## 854 **Accessions**

855 **TargetALS**<sup>12</sup> TargetALS data was pushed directly from the NY Genome center to our sftp  
856 server.

857 **CMC**<sup>118</sup> CMC data was downloaded from <https://www.synapse.org/> using synapse client  
858 (<https://python-docs.synapse.org/build/html/index.html>). Accession code: syn2759792

859 **GTEX**<sup>86</sup> GTEx was downloaded from SRA using fastq-dump of the SRA toolkit  
860 ([http://www.ncbi.nlm.nih.gov/Traces/sra/sra.cgi?cmd=show&f=software&m=software&s=softw](http://www.ncbi.nlm.nih.gov/Traces/sra/sra.cgi?cmd=show&f=software&m=software&s=software)  
861 [are](http://www.ncbi.nlm.nih.gov/Traces/sra/sra.cgi?cmd=show&f=software&m=software&s=software)). Access has been requested and granted through dbGaP.

862 **Braineac**<sup>7</sup> Braineac data has been pushed to our ftp server by Biogen.

863 **AMP-AD**<sup>5</sup> AMP-AD data has been downloaded from synapse<sup>13</sup>. Accession code: syn2580853.

864 snRNA-seq was collected using Synapse accession code: syn18485175. IHC data:

865 <https://github.com/ellispatrick/CortexCellDeconv/tree/master/CellTypeDeconvAnalysis/Data>

866 **ENA**<sup>13</sup> ENA data has been downloaded from the European Nucleotide Archive. The identifiers  
867 of the 76 included studies and 2021 brain samples are listed in Supplementary Table 29.

868 **CMC\_HBCC**: CMC\_HBCC data was downloaded from <https://www.synapse.org/> using  
869 synapse client (<https://python-docs.synapse.org/build/html/index.html>). Accession code:  
870 syn10623034

871 **BrainSeq** BrainSeq data was downloaded from <https://www.synapse.org/> using synapse client  
872 (<https://python-docs.synapse.org/build/html/index.html>). Accession code: syn12299750

873 **UCLA\_ASD** UCLA\_ASD data was downloaded from <https://www.synapse.org/> using synapse  
874 client (<https://python-docs.synapse.org/build/html/index.html>). Accession code: syn4587609

875 **BrainGVEx** BrainGVEx data was downloaded from <https://www.synapse.org/> using synapse  
876 client (<https://python-docs.synapse.org/build/html/index.html>). Accession code: syn4590909

877 **BipSeq** BipSeq data was downloaded from <https://www.synapse.org/> using synapse client  
878 (<https://python-docs.synapse.org/build/html/index.html>). Accession code: syn5844980

879 **GTEx** GTEx data was downloaded from dbgap. Accession code: phs000424.v7.p2

880 **NABEC** NABEC data was downloaded from dbgap. Accession code: phs001301.v1.p1

881 **CellMap** single-cell and single-nuclei RNA-seq datasets were downloaded from Gene  
882 Expression Omnibus (GEO), BioProject, the European Genome-phenome Archive (EGA) and  
883 the Allan Brain Atlas. Accession codes: GSE97930, GSE126836, GSE103723, GSE104276,  
884 PRJNA544731, PRJNA434002, phs000424, phs001836.

885



## 886 **Acknowledgements**

887 We thank the donors of the brain tissues underlying the RNA-seq data used for this study and  
888 their families for their willingness to donate samples for research. We would like to thank the  
889 Center for Information Technology of the University of Groningen for their support and for  
890 providing access to the Peregrine high-performance computing cluster, as well as the UMCG  
891 Genomics Coordination center, the UG Center for Information Technology and their sponsors  
892 BBMRI-NL and TarGet for storage and compute infrastructure. We would like to greatly thank  
893 all researchers involved with the following projects for making their data available for use.  
894 E.A.T., Y.H., C.-Y.C, E.E.M., M.I.Z. and H.R. are employed by Biogen. D.B. and T.R.G. are  
895 supported by funding from the UK Medical Research Council (MRC Integrative Epidemiology  
896 Unit at the University of Bristol, MC\_UU\_00011/4) and a sponsored research collaboration with  
897 Biogen. L.F. is supported by grants from the Dutch Research Council (ZonMW-VIDI  
898 917.14.374 to L.F.), by an ERC Starting Grant, grant agreement 637640 (ImmRisk), by an  
899 Oncode Senior Investigator grant and a sponsored research collaboration with Biogen. This  
900 project has received funding from the European Research Council (ERC) under the European  
901 Union's Horizon 2020 research and innovation programme (grant agreement n° 772376 -  
902 EScORIAL. The authors thank the Biogen CellMap team (Z. Ouyang, N. Bourgeois, E.  
903 Lyashenko, P. Cundiff, K. Li, X. Zhang, F. Casey, S. Engle, R. Kleiman, B. Zhang and M.  
904 Zavodszky) for the expertise and advice provided toward deriving the cell-type specific  
905 expression profiles.

906

## 907 **ROSMAP**

908 The results published here are in whole or in part based on data obtained from the AMP-AD  
909 Knowledge Portal ([doi:10.7303/syn2580853](https://doi.org/10.7303/syn2580853)) Study data were provided by the Rush Alzheimer's  
910 Disease Center, Rush University Medical Center, Chicago. Data collection was supported  
911 through funding by NIA grants P30AG10161, R01AG15819, R01AG17917, R01AG30146,  
912 R01AG36836, U01AG32984, U01AG46152, the Illinois Department of Public Health, and the  
913 Translational Genomics Research Institute.  
914 Genotype data: [doi:10.1038/mp.2017.20](https://doi.org/10.1038/mp.2017.20). RNAseq: [doi:10.1038/s41593-018-0154-9](https://doi.org/10.1038/s41593-018-0154-9). snRNA-  
915 seq: [doi:10.7303/syn18485175](https://doi.org/10.7303/syn18485175)

916

## 917 **Mayo**

918 The results published here are in whole or in part based on data obtained from the AMP-AD  
919 Knowledge Portal ([doi:10.7303/syn2580853](https://doi.org/10.7303/syn2580853)). Study data were provided by the following  
920 sources: The Mayo Clinic Alzheimer's Disease Genetic Studies, led by Dr. Nilufer Taner and Dr.  
921 Steven G. Younkin, Mayo Clinic, Jacksonville, FL using samples from the Mayo Clinic Study of  
922 Aging, the Mayo Clinic Alzheimer's Disease Research Center, and the Mayo Clinic Brain Bank.  
923 Data collection was supported through funding by NIA grants P50 AG016574, R01 AG032990,  
924 U01 AG046139, R01 AG018023, U01 AG006576, U01 AG006786, R01 AG025711, R01  
925 AG017216, R01 AG003949, NINDS grant R01 NS080820, CurePSP Foundation, and support  
926 from Mayo Foundation. Study data includes samples collected through the Sun Health Research  
927 Institute Brain and Body Donation Program of Sun City, Arizona. The Brain and Body Donation  
928 Program is supported by the National Institute of Neurological Disorders and Stroke (U24  
929 NS072026 National Brain and Tissue Resource for Parkinsons Disease and Related Disorders),  
930 the National Institute on Aging (P30 AG19610 Arizona Alzheimer's Disease Core Center), the  
931 Arizona Department of Health Services (contract 211002, Arizona Alzheimer's Research

932 Center), the Arizona Biomedical Research Commission (contracts 4001, 0011, 05-901 and 1001  
933 to the Arizona Parkinson's Disease Consortium) and the Michael J. Fox Foundation for  
934 Parkinson's Research. [doi:10.1038/sdata.2016.89](https://doi.org/10.1038/sdata.2016.89)

935

### 936 **MSBB**

937 The results published here are in whole or in part based on data obtained from the AMP-AD  
938 Knowledge Portal ([doi:10.7303/syn2580853](https://doi.org/10.7303/syn2580853)). These data were generated from postmortem brain  
939 tissue collected through the Mount Sinai VA Medical Center Brain Bank and were provided by  
940 Dr. Eric Schadt from Mount Sinai School of Medicine.

941

### 942 **CMC**

943 Data were generated as part of the CommonMind Consortium supported by funding from Takeda  
944 Pharmaceuticals Company Limited, F. Hoffman-La Roche Ltd and NIH grants R01MH085542,  
945 R01MH093725, P50MH066392, P50MH080405, R01MH097276, RO1-MH-075916,  
946 P50M096891, P50MH084053S1, R37MH057881, AG02219, AG05138, MH06692,  
947 R01MH110921, R01MH109677, R01MH109897, U01MH103392, and contract  
948 HHSN271201300031C through IRP NIMH. Brain tissue for the study was obtained from the  
949 following brain bank collections: The Mount Sinai NIH Brain and Tissue Repository, the  
950 University of Pennsylvania Alzheimer's Disease Core Center, the University of Pittsburgh  
951 NeuroBioBank and Brain and Tissue Repositories, and the NIMH Human Brain Collection Core.  
952 CMC Leadership: Panos Roussos, Joseph Buxbaum, Andrew Chess, Schahram Akbarian,  
953 Vahram Haroutunian (Icahn School of Medicine at Mount Sinai), Bernie Devlin, David Lewis  
954 (University of Pittsburgh), Raquel Gur, Chang-Gyu Hahn (University of Pennsylvania), Enrico  
955 Domenici (University of Trento), Mette A. Peters, Solveig Sieberts (Sage Bionetworks), Thomas  
956 Lehner, Stefano Marengo, Barbara K. Lipska (NIMH).

957

### 958 **GTE<sub>x</sub>**

959 The Genotype-Tissue Expression (GTE<sub>x</sub>) Project was supported by the Common Fund of the  
960 Office of the Director of the National Institutes of Health ([commonfund.nih.gov/GTE<sub>x</sub>](http://commonfund.nih.gov/GTEx)).  
961 Additional funds were provided by the NCI, NHGRI, NHLBI, NIDA, NIMH, and NINDS.  
962 Donors were enrolled at Biospecimen Source Sites funded by NCI\Leidos Biomedical Research,  
963 Inc. subcontracts to the National Disease Research Interchange (10XS170), Roswell Park Cancer  
964 Institute (10XS171), and Science Care, Inc. (X10S172). The Laboratory, Data Analysis, and  
965 Coordinating Center (LDACC) was funded through a contract (HHSN268201000029C) to the  
966 The Broad Institute, Inc. Biorepository operations were funded through a Leidos Biomedical  
967 Research, Inc. subcontract to Van Andel Research Institute (10ST1035). Additional data  
968 repository and project management were provided by Leidos Biomedical Research,  
969 Inc.(HHSN261200800001E). The Brain Bank was supported supplements to University of  
970 Miami grant DA006227. Statistical Methods development grants were made to the University of  
971 Geneva (MH090941 & MH101814), the University of Chicago (MH090951, MH090937,  
972 MH101825, & MH101820), the University of North Carolina - Chapel Hill (MH090936), North  
973 Carolina State University (MH101819), Harvard University (MH090948), Stanford University  
974 (MH101782), Washington University (MH101810), and to the University of Pennsylvania  
975 (MH101822). The datasets used for the analyses described in this manuscript were obtained from  
976 dbGaP at <http://www.ncbi.nlm.nih.gov/gap> through dbGaP accession number phs000424.v7.p2  
977 on 02/27/2020.

978

## 979 **NABEC**

980 Data was collected from dbGAP accession phs001301.v1.p1, which was generated by J. R.  
981 Gibbs, M. van der Brug, D. Hernandez, B. Traynor, M. Nalls, S-L. Lai, S. Arepalli, A. Dillman,  
982 I. Rafferty, J. Troncoso, R. Johnson, H. R. Zielke, L. Ferrucci, D. Longo, M.R. Cookson, and  
983 A.B. Singleton. The NABEC dataset was generated at National Institute on Aging, Bethesda,  
984 MD, USA, Institute of Neurology, University College London, London, UK, The Scripps  
985 Research Institute, Jupiter, FL, USA, Johns Hopkins University, Baltimore, MD, USA, and the  
986 University of Maryland Medical School, Baltimore, MD, USA. NABEC was funded by Z01  
987 AG000949-02. National Institutes of Health, Bethesda, MD, USA and Z01 AG000015-49.  
988 National Institutes of Health, Bethesda, MD, USA.

989

## 990 **TargetALS**

991 This data set was generated and supported by the following: Target ALS Human Postmortem  
992 Tissue Core, New York Genome Center for Genomics of Neurodegenerative Disease,  
993 Amyotrophic Lateral Sclerosis Association and TOW Foundation.

994

## 995 **Braineac**

996 Data was collected from doi.org/10.1038/s41467-020-14483-x, which was generated by Mina  
997 Ryten, David Zhang, and Karishma D'Sa, Sebastian Guelfi and Regina Reynolds. Mina Ryten,  
998 David Zhang, and Karishma D'Sa were supported by the UK Medical Research Council (MRC)  
999 through the award of Tenure-track Clinician Scientist Fellowship to Mina Ryten  
1000 (MR/N008324/1). Sebastian Guelfi was supported by Alzheimer's Research UK through the  
1001 award of a PhD Fellowship (ARUK-PhD2014-16). Regina Reynolds was supported through the  
1002 award of a Leonard Wolfson Doctoral Training Fellowship in Neurodegeneration. All RNA  
1003 sequencing data performed as part of this study were generated by the commercial company  
1004 AROS Applied Biotechnology A/S (Denmark).

1005

1006 We also would like to thank Guelfi *et al.*<sup>119</sup> for the use of their data.

1007

## 1008 **European Nucleotide Archive**

1009 We would like to thank all donors and their families, principal investigators and their funding  
1010 bodies for each of the projects included from the European Nucleotide Archive.

1011

## 1012 **UCLA ASD, Bipseq, BrainGVEx and LIBD**

1013 Data were generated as part of the PsychENCODE Consortium supported by: U01MH103339,  
1014 U01MH103365, U01MH103392, U01MH103340, U01MH103346, R01MH105472,  
1015 R01MH094714, R01MH105898, R21MH102791, R21MH105881, R21MH103877, and  
1016 P50MH106934 awarded to: Schahram Akbarian (Icahn School of Medicine at Mount Sinai),  
1017 Gregory Crawford (Duke), Stella Dracheva (Icahn School of Medicine at Mount Sinai), Peggy  
1018 Farnham (USC), Mark Gerstein (Yale), Daniel Geschwind (UCLA), Thomas M. Hyde (LIBD),  
1019 Andrew Jaffe (LIBD), James A. Knowles (USC), Chunyu Liu (UIC), Dalila Pinto (Icahn School  
1020 of Medicine at Mount Sinai), Nenad Sestan (Yale), Pamela Sklar (Icahn School of Medicine at  
1021 Mount Sinai), Matthew State (UCSF), Patrick Sullivan (UNC), Flora Vaccarino (Yale), Sherman  
1022 Weissman (Yale), Kevin White (UChicago) and Peter Zandi (JHU).

1023

1024

1025

1026 **Author contributions**

1027 N.K., O.E.G, and H.W. processed the RNA-seq and genotype data. N.K. and H.W. were  
1028 responsible for data management. N.K. and H.W. were responsible for the *cis*-eQTL analysis.  
1029 H.W. was responsible for the *trans*-eQTL analysis. M.V., Z.O. and M.I.Z. were responsible for  
1030 the cell type proportion prediction. N.K. and M.V. were responsible for the cell type interaction  
1031 analysis. S.D. was responsible for the selection of brain samples from ENA. D.B., Y.H., C.-Y.C.,  
1032 E.E.M, T.R.G. and E.A.T. were responsible for MR and colocalization analysis and  
1033 interpretation. P.D., O.B.B. and L.F. were responsible for the Downstreamer analysis. L.F.,  
1034 E.A.T. and H.R. acquired funding and supervised the study. N.K., E.A.T., M.V., D.B, Y.H., C.-  
1035 Y.C., O.B.B., H.R., L.F. and H.W. drafted the manuscript. All authors have proof-read the  
1036 manuscript.

1037

1038

1039

## 1040 **References**

- 1041 1. Vos, T. *et al.* Global burden of 369 diseases and injuries in 204 countries and territories,  
1042 1990–2019: a systematic analysis for the Global Burden of Disease Study 2019. *The Lancet* **396**,  
1043 1204–1222 (2020).
- 1044 2. World Alzheimer Report 2018 - The state of the art of dementia research: New frontiers.  
1045 *NEW Front.* 48.
- 1046 3. Donovan, M. K. R., D’Antonio-Chronowska, A., D’Antonio, M. & Frazer, K. A. Cellular  
1047 deconvolution of GTEx tissues powers discovery of disease and cell-type associated regulatory  
1048 variants. *Nat. Commun.* **11**, 955 (2020).
- 1049 4. Wang, D. *et al.* Comprehensive functional genomic resource and integrative model for  
1050 the human brain. *Science* **362**, (2018).
- 1051 5. Raj, T. *et al.* Integrative transcriptome analyses of the aging brain implicate altered  
1052 splicing in Alzheimer’s disease susceptibility. *Nat. Genet.* **50**, 1584–1592 (2018).
- 1053 6. Hodes, R. J. & Buckholtz, N. Accelerating Medicines Partnership: Alzheimer’s Disease  
1054 (AMP-AD) Knowledge Portal Aids Alzheimer’s Drug Discovery through Open Data Sharing.  
1055 *Expert Opin. Ther. Targets* **20**, 389–391 (2016).
- 1056 7. Ramasamy, A. *et al.* Genetic variability in the regulation of gene expression in ten  
1057 regions of the human brain. *Nat. Neurosci.* **17**, 1418–1428 (2014).
- 1058 8. Consortium\*, T. P. Revealing the brain’s molecular architecture. *Science* **362**, 1262–1263  
1059 (2018).
- 1060 9. Fromer, M. *et al.* Gene expression elucidates functional impact of polygenic risk for  
1061 schizophrenia. *Nat. Neurosci.* **19**, 1442–1453 (2016).
- 1062 10. BrainSeq: A Human Brain Genomics Consortium. BrainSeq: Neurogenomics to Drive  
1063 Novel Target Discovery for Neuropsychiatric Disorders. *Neuron* **88**, 1078–1083 (2015).
- 1064 11. Gibbs, J. R. *et al.* Abundant Quantitative Trait Loci Exist for DNA Methylation and Gene  
1065 Expression in Human Brain. *PLOS Genet.* **6**, e1000952 (2010).
- 1066 12. Prudencio, M. *et al.* Distinct brain transcriptome profiles in C9orf72-associated and  
1067 sporadic ALS. *Nat. Neurosci.* **18**, 1175–1182 (2015).
- 1068 13. Leinonen, R. *et al.* The European Nucleotide Archive. *Nucleic Acids Res.* **39**, D28–D31  
1069 (2011).
- 1070 14. Võsa, U. *et al.* Unraveling the polygenic architecture of complex traits using blood eQTL  
1071 metaanalysis. *bioRxiv* 447367 (2018) doi:10.1101/447367.
- 1072 15. Dobbyn, A. *et al.* Landscape of Conditional eQTL in Dorsolateral Prefrontal Cortex and  
1073 Co-localization with Schizophrenia GWAS. *Am. J. Hum. Genet.* **102**, 1169–1184 (2018).
- 1074 16. Wingender, E., Dietze, P., Karas, H. & Knüppel, R. TRANSFAC: a database on  
1075 transcription factors and their DNA binding sites. *Nucleic Acids Res.* **24**, 238–241 (1996).
- 1076 17. Võsa, U. *et al.* Unraveling the polygenic architecture of complex traits using blood eQTL  
1077 metaanalysis. *bioRxiv* 447367 (2018) doi:10.1101/447367.
- 1078 18. Foley, C. N. *et al.* A fast and efficient colocalization algorithm for identifying shared  
1079 genetic risk factors across multiple traits. *Nat. Commun.* **12**, 764 (2021).
- 1080 19. Fu, J. *et al.* Unraveling the Regulatory Mechanisms Underlying Tissue-Dependent  
1081 Genetic Variation of Gene Expression. *PLOS Genet.* **8**, e1002431 (2012).
- 1082 20. Fu, J. *et al.* Unraveling the Regulatory Mechanisms Underlying Tissue-Dependent  
1083 Genetic Variation of Gene Expression. *PLOS Genet.* **8**, e1002431 (2012).



- 1084 21. Glastonbury, C. A., Couto Alves, A., El-Sayed Moustafa, J. S. & Small, K. S. Cell-Type  
1085 Heterogeneity in Adipose Tissue Is Associated with Complex Traits and Reveals Disease-  
1086 Relevant Cell-Specific eQTLs. *Am. J. Hum. Genet.* **104**, 1013–1024 (2019).
- 1087 22. Raúl Aguirre-Gamboa *et al.* Deconvolution of bulk blood eQTL effects into immune cell  
1088 subpopulations. *BMC Bioinformatics* **21**, 243 (2020).
- 1089 23. Zhengyu, O. *et al.* CellMap: Characterizing the type and composition of iPSC-derived  
1090 cell lines from bulk RNA-seq data. *Manuscr. Prep.*
- 1091 24. BAHNEY, J. & VON BARTHELD, C. S. The Cellular Composition and Glia-Neuron  
1092 Ratio in the Spinal Cord of a Human and a Non-Human Primate: Comparison with other Species  
1093 and Brain Regions. *Anat. Rec. Hoboken NJ 2007* **301**, 697–710 (2018).
- 1094 25. Patrick, E. *et al.* Deconvolving the contributions of cell-type heterogeneity on cortical  
1095 gene expression. *PLOS Comput. Biol.* **16**, e1008120 (2020).
- 1096 26. Herculano-Houzel, S. The human brain in numbers: a linearly scaled-up primate brain.  
1097 *Front. Hum. Neurosci.* **3**, (2009).
- 1098 27. von Bartheld, C. S., Bahney, J. & Herculano-Houzel, S. The Search for True Numbers of  
1099 Neurons and Glial Cells in the Human Brain: A Review of 150 Years of Cell Counting. *J. Comp.*  
1100 *Neurol.* **524**, 3865–3895 (2016).
- 1101 28. Mathys, H. *et al.* Single-cell transcriptomic analysis of Alzheimer’s disease. *Nature* **570**,  
1102 332–337 (2019).
- 1103 29. Ng, B. *et al.* Using Transcriptomic Hidden Variables to Infer Context-Specific Genotype  
1104 Effects in the Brain. *Am. J. Hum. Genet.* **105**, 562–572 (2019).
- 1105 30. Zhao, B. *et al.* Large-scale GWAS reveals genetic architecture of brain white matter  
1106 microstructure and genetic overlap with cognitive and mental health traits ( n = 17,706). *Mol.*  
1107 *Psychiatry* 1–13 (2019) doi:10.1038/s41380-019-0569-z.
- 1108 31. Smorodchenko, A. *et al.* Comparative analysis of uncoupling protein 4 distribution in  
1109 various tissues under physiological conditions and during development. *Biochim. Biophys. Acta*  
1110 *BBA - Biomembr.* **1788**, 2309–2319 (2009).
- 1111 32. Liu, D. *et al.* Mitochondrial UCP4 mediates an adaptive shift in energy metabolism and  
1112 increases the resistance of neurons to metabolic and oxidative stress. *Neuromolecular Med.* **8**,  
1113 389–414 (2006).
- 1114 33. Yasuno, K. *et al.* Synergistic association of mitochondrial uncoupling protein (UCP)  
1115 genes with schizophrenia. *Am. J. Med. Genet. Part B Neuropsychiatr. Genet. Off. Publ. Int. Soc.*  
1116 *Psychiatr. Genet.* **144B**, 250–253 (2007).
- 1117 34. Ho, P. W. *et al.* Mitochondrial neuronal uncoupling proteins: a target for potential  
1118 disease-modification in Parkinson’s disease. *Transl. Neurodegener.* **1**, 3 (2012).
- 1119 35. Ramsden, D. B. *et al.* Human neuronal uncoupling proteins 4 and 5 (UCP4 and UCP5):  
1120 structural properties, regulation, and physiological role in protection against oxidative stress and  
1121 mitochondrial dysfunction. *Brain Behav.* **2**, 468–478 (2012).
- 1122 36. Giambartolomei, C. *et al.* Bayesian test for colocalisation between pairs of genetic  
1123 association studies using summary statistics. *PLoS Genet.* **10**, e1004383 (2014).
- 1124 37. Consortium\*†, I. M. S. G. Multiple sclerosis genomic map implicates peripheral immune  
1125 cells and microglia in susceptibility. *Science* **365**, (2019).
- 1126 38. International Multiple Sclerosis Genetics, C. *et al.* Genetic risk and a primary role for  
1127 cell-mediated immune mechanisms in multiple sclerosis. *Nature* **476**, 214–9 (2011).
- 1128 39. Consortium\*†, I. M. S. G. Multiple sclerosis genomic map implicates peripheral immune  
1129 cells and microglia in susceptibility. *Science* **365**, (2019).

- 1130 40. Jones, G., Prosser, D. E. & Kaufmann, M. 25-Hydroxyvitamin D-24-hydroxylase  
1131 (CYP24A1): its important role in the degradation of vitamin D. *Arch Biochem Biophys* **523**, 9–18  
1132 (2012).
- 1133 41. Schlingmann, K. P. *et al.* Mutations in CYP24A1 and idiopathic infantile hypercalcemia.  
1134 *N Engl J Med* **365**, 410–21 (2011).
- 1135 42. Cappellani, D. *et al.* Hereditary Hypercalcemia Caused by a Homozygous Pathogenic  
1136 Variant in the CYP24A1 Gene: A Case Report and Review of the Literature. *Case Rep*  
1137 *Endocrinol* **2019**, 4982621 (2019).
- 1138 43. Mpandzou, G., Ait Ben Haddou, E., Regragui, W., Benomar, A. & Yahyaoui, M. Vitamin  
1139 D deficiency and its role in neurological conditions: A review. *Rev. Neurol. (Paris)* **172**, 109–  
1140 122 (2016).
- 1141 44. Agnello, L. *et al.* CYP27A1, CYP24A1, and RXR-alpha Polymorphisms, Vitamin D, and  
1142 Multiple Sclerosis: a Pilot Study. *J Mol Neurosci* **66**, 77–84 (2018).
- 1143 45. Pierrot-Deseilligny, C. & Souberbielle, J. C. Is hypovitaminosis D one of the  
1144 environmental risk factors for multiple sclerosis? *Brain* **133**, 1869–88 (2010).
- 1145 46. Rhead, B. *et al.* Mendelian randomization shows a causal effect of low vitamin D on  
1146 multiple sclerosis risk. *Neurol. Genet.* **2**, e97 (2016).
- 1147 47. Jacobs, B. M., Noyce, A. J., Giovannoni, G. & Dobson, R. BMI and low vitamin D are  
1148 causal factors for multiple sclerosis: A Mendelian Randomization study. *Neurol. Neuroimmunol.*  
1149 *Neuroinflammation* **7**, (2020).
- 1150 48. Jiang, X., Ge, T. & Chen, C.-Y. The causal role of circulating vitamin D concentrations  
1151 in human complex traits and diseases: a large-scale Mendelian randomization study. *Sci. Rep.* **11**,  
1152 184 (2021).
- 1153 49. Ramasamy, A. *et al.* Genetic evidence for a pathogenic role for the vitamin D3  
1154 metabolizing enzyme CYP24A1 in multiple sclerosis. *Mult. Scler. Relat. Disord.* **3**, 211–219  
1155 (2014).
- 1156 50. van Luijn, M. M. *et al.* Multiple sclerosis-associated CLEC16A controls HLA class II  
1157 expression via late endosome biogenesis. *Brain J. Neurol.* **138**, 1531–1547 (2015).
- 1158 51. Ferrari, R. *et al.* Frontotemporal dementia and its subtypes: a genome-wide association  
1159 study. *Lancet Neurol* **13**, 686–99 (2014).
- 1160 52. Wray, N. R. *et al.* Genome-wide association analyses identify 44 risk variants and refine  
1161 the genetic architecture of major depression. *Nat. Genet.* **50**, 668–681 (2018).
- 1162 53. Li, Z. *et al.* Genetic variants associated with Alzheimer’s disease confer different cerebral  
1163 cortex cell-type population structure. *Genome Med.* **10**, 43 (2018).
- 1164 54. Park, Y. *et al.* Single-cell deconvolution of 3,000 post-mortem brain samples for eQTL  
1165 and GWAS dissection in mental disorders. *bioRxiv* 2021.01.21.426000 (2021)  
1166 doi:10.1101/2021.01.21.426000.
- 1167 55. Li, Z. *et al.* The TMEM106B FTLN-protective variant, rs1990621, is also associated with  
1168 increased neuronal proportion. *Acta Neuropathol. (Berl.)* **139**, 45–61 (2020).
- 1169 56. Raudvere, U. *et al.* g:Profiler: a web server for functional enrichment analysis and  
1170 conversions of gene lists (2019 update). *Nucleic Acids Res.* **47**, W191–W198 (2019).
- 1171 57. Sankaran, V. G. *et al.* Human Fetal Hemoglobin Expression Is Regulated by the  
1172 Developmental Stage-Specific Repressor BCL11A. *Science* **322**, 1839–1842 (2008).
- 1173 58. Jiang, J. *et al.* cMYB is involved in the regulation of fetal hemoglobin production in  
1174 adults. *Blood* **108**, 1077–1083 (2006).

- 1175 59. Métais, J.-Y. *et al.* Genome editing of HBG1 and HBG2 to induce fetal hemoglobin.  
1176 *Blood Adv.* **3**, 3379–3392 (2019).
- 1177 60. J, D. & A, B. Dalfampridine: a brief review of its mechanism of action and efficacy as a  
1178 treatment to improve walking in patients with multiple sclerosis. *Curr. Med. Res. Opin.* **27**,  
1179 1415–1423 (2011).
- 1180 61. Al-Owais, M. M. *et al.* Multiple mechanisms mediating carbon monoxide inhibition of  
1181 the voltage-gated K<sup>+</sup> channel Kv1.5. *Cell Death Dis.* **8**, e3163–e3163 (2017).
- 1182 62. Rus, H. *et al.* The voltage-gated potassium channel Kv1.3 is highly expressed on  
1183 inflammatory infiltrates in multiple sclerosis brain. *Proc. Natl. Acad. Sci.* **102**, 11094–11099  
1184 (2005).
- 1185 63. Noordam, R. *et al.* Multi-ancestry sleep-by-SNP interaction analysis in 126,926  
1186 individuals reveals lipid loci stratified by sleep duration. *Nat. Commun.* **10**, 5121 (2019).
- 1187 64. Gallois, A. *et al.* A comprehensive study of metabolite genetics reveals strong pleiotropy  
1188 and heterogeneity across time and context. *Nat. Commun.* **10**, 4788 (2019).
- 1189 65. Sun, B. B. *et al.* Genomic atlas of the human plasma proteome. *Nature* **558**, 73–79  
1190 (2018).
- 1191 66. Suhre, K. *et al.* Connecting genetic risk to disease end points through the human blood  
1192 plasma proteome. *Nat. Commun.* **8**, 14357 (2017).
- 1193 67. Tin, A. *et al.* Target genes, variants, tissues and transcriptional pathways influencing  
1194 human serum urate levels. *Nat. Genet.* **51**, 1459–1474 (2019).
- 1195 68. Kichaev, G. *et al.* Leveraging Polygenic Functional Enrichment to Improve GWAS  
1196 Power. *Am. J. Hum. Genet.* **104**, 65–75 (2019).
- 1197 69. Pers, T. H. *et al.* Biological interpretation of genome-wide association studies using  
1198 predicted gene functions. *Nat. Commun.* **6**, 5890 (2015).
- 1199 70. Deelen, P. *et al.* Improving the diagnostic yield of exome-sequencing by predicting  
1200 gene–phenotype associations using large-scale gene expression analysis. *Nat. Commun.* **10**, 1–13  
1201 (2019).
- 1202 71. Ripke, S. *et al.* Biological insights from 108 schizophrenia-associated genetic loci.  
1203 *Nature* **511**, 421–427 (2014).
- 1204 72. Nalls, M. A. *et al.* Identification of novel risk loci, causal insights, and heritable risk for  
1205 Parkinson’s disease: a meta-analysis of genome-wide association studies. *Lancet Neurol* **18**,  
1206 1091–1102 (2019).
- 1207 73. Kunkle, B. W. *et al.* Genetic meta-analysis of diagnosed Alzheimer’s disease identifies  
1208 new risk loci and implicates A $\beta$ , tau, immunity and lipid processing. *Nat. Genet.* **51**, 414–430  
1209 (2019).
- 1210 74. Conroy, J. *et al.* A novel locus for episodic ataxia:UBR4 the likely candidate. *Eur. J.*  
1211 *Hum. Genet. EJHG* **22**, 505–510 (2014).
- 1212 75. Leal, S. S. & Gomes, C. M. Calcium dysregulation links ALS defective proteins and  
1213 motor neuron selective vulnerability. *Front. Cell. Neurosci.* **9**, 225 (2015).
- 1214 76. Kalinowska-Lyszczarz, A. & Losy, J. The Role of Neurotrophins in Multiple Sclerosis—  
1215 Pathological and Clinical Implications. *Int. J. Mol. Sci.* **13**, 13713–13725 (2012).
- 1216 77. Kerschensteiner, M. *et al.* Activated human T cells, B cells, and monocytes produce  
1217 brain-derived neurotrophic factor in vitro and in inflammatory brain lesions: a neuroprotective  
1218 role of inflammation? *J. Exp. Med.* **189**, 865–870 (1999).



- 1219 78. De Santi, L. *et al.* Neuroinflammation and neuroprotection: an update on (future)  
1220 neurotrophin-related strategies in multiple sclerosis treatment. *Curr. Med. Chem.* **18**, 1775–1784  
1221 (2011).
- 1222 79. Baecher-Allan, C., Kaskow, B. J. & Weiner, H. L. Multiple Sclerosis: Mechanisms and  
1223 Immunotherapy. *Neuron* **97**, 742–768 (2018).
- 1224 80. Redondo, J. *et al.* Purkinje Cell Pathology and Loss in Multiple Sclerosis Cerebellum.  
1225 *Brain Pathol. Zurich Switz.* **25**, 692–700 (2015).
- 1226 81. Wang, X. & Goldstein, D. B. Enhancer Domains Predict Gene Pathogenicity and Inform  
1227 Gene Discovery in Complex Disease. *Am. J. Hum. Genet.* **106**, 215–233 (2020).
- 1228 82. Wijst, M. G. P. van der *et al.* Single-cell RNA sequencing identifies celltype-specific cis-  
1229 eQTLs and co-expression QTLs. *Nat. Genet.* **50**, 493–497 (2018).
- 1230 83. Population-scale single-cell RNA-seq profiling across dopaminergic neuron  
1231 differentiation | bioRxiv. <https://www.biorxiv.org/content/10.1101/2020.05.21.103820v1>.
- 1232 84. Consortium, S. W. G. of the P. G., Ripke, S., Walters, J. T. & O’Donovan, M. C.  
1233 Mapping genomic loci prioritises genes and implicates synaptic biology in schizophrenia.  
1234 *medRxiv* 2020.09.12.20192922 (2020) doi:10.1101/2020.09.12.20192922.
- 1235 85. Davenport, E. E. *et al.* Discovering in vivo cytokine-eQTL interactions from a lupus  
1236 clinical trial. *Genome Biol.* **19**, 168 (2018).
- 1237 86. Genetic effects on gene expression across human tissues. *Nature* **550**, 204–213 (2017).
- 1238 87. Hemani, G. *et al.* The MR-Base platform supports systematic causal inference across the  
1239 human phenome. *eLife* **7**, (2018).
- 1240 88. Hemani, G., Bowden, J. & Davey Smith, G. Evaluating the potential role of pleiotropy in  
1241 Mendelian randomization studies. *Hum. Mol. Genet.* **27**, R195–R208 (2018).
- 1242 89. Eliciting priors and relaxing the single causal variant assumption in colocalisation  
1243 analyses. <https://journals.plos.org/plosgenetics/article?id=10.1371/journal.pgen.1008720>.
- 1244 90. Team, T. S. E. *synapseclient: A client for Synapse, a collaborative compute space that*  
1245 *allows scientists to share and analyze data together.*
- 1246 91. Tsui, B., Dow, M., Skola, D. & Carter, H. Extracting allelic read counts from 250,000  
1247 human sequencing runs in Sequence Read Archive. *bioRxiv* 386441 (2018) doi:10.1101/386441.
- 1248 92. Swertz, M. A. *et al.* The MOLGENIS toolkit: rapid prototyping of biosoftware at the  
1249 push of a button. *BMC Bioinformatics* **11**, S12 (2010).
- 1250 93. Frankish, A. *et al.* GENCODE reference annotation for the human and mouse genomes.  
1251 *Nucleic Acids Res.* **47**, D766–D773 (2019).
- 1252 94. Dobin, A. *et al.* STAR: ultrafast universal RNA-seq aligner. *Bioinformatics* **29**, 15–21  
1253 (2013).
- 1254 95. Anders, S., Pyl, P. T. & Huber, W. HTSeq—a Python framework to work with high-  
1255 throughput sequencing data. *Bioinformatics* **31**, 166–169 (2015).
- 1256 96. Robinson, M. D. & Oshlack, A. A scaling normalization method for differential  
1257 expression analysis of RNA-seq data. *Genome Biol.* **11**, R25 (2010).
- 1258 97. Robinson, M. D., McCarthy, D. J. & Smyth, G. K. edgeR: a Bioconductor package for  
1259 differential expression analysis of digital gene expression data. *Bioinformatics* **26**, 139–140  
1260 (2010).
- 1261 98. R Core Team. *R: A language and environment for statistical computing.* (R Foundation  
1262 for Statistical Computing, 2017).
- 1263 99. Babraham Bioinformatics - FastQC A Quality Control tool for High Throughput  
1264 Sequence Data. <https://www.bioinformatics.babraham.ac.uk/projects/fastqc/>.

- 1265 100. Broad Institute. *Picard Tools*. (2019).
- 1266 101. McCarthy, S. *et al.* A reference panel of 64,976 haplotypes for genotype imputation. *Nat.*  
1267 *Genet.* **48**, 1279–1283 (2016).
- 1268 102. Deelen, P. *et al.* Genotype harmonizer: automatic strand alignment and format conversion  
1269 for genotype data integration. *BMC Res. Notes* **7**, 901 (2014).
- 1270 103. Das, S. *et al.* Next-generation genotype imputation service and methods. *Nat. Genet.* **48**,  
1271 1284–1287 (2016).
- 1272 104. Chang, C. C. *et al.* Second-generation PLINK: rising to the challenge of larger and richer  
1273 datasets. *GigaScience* **4**, (2015).
- 1274 105. Roberts, T. C., Morris, K. V. & Wood, M. J. A. The role of long non-coding RNAs in  
1275 neurodevelopment, brain function and neurological disease. *Philos. Trans. R. Soc. B Biol. Sci.*  
1276 **369**, (2014).
- 1277 106. Westra, H.-J. *et al.* Systematic identification of trans-eQTLs as putative drivers of known  
1278 disease associations. *Nat. Genet.* **45**, 1238–1243 (2013).
- 1279 107. Lyon, M. *et al.* The variant call format provides efficient and robust storage of GWAS  
1280 summary statistics. *bioRxiv* 2020.05.29.115824 (2020) doi:10.1101/2020.05.29.115824.
- 1281 108. Buniello, A. *et al.* The NHGRI-EBI GWAS Catalog of published genome-wide  
1282 association studies, targeted arrays and summary statistics 2019. *Nucleic Acids Res.* **47**, D1005–  
1283 D1012 (2019).
- 1284 109. Lawson, C. L. & Hanson, R. J. *Solving Least Squares Problems*. (Society for Industrial  
1285 and Applied Mathematics, 1995). doi:10.1137/1.9781611971217.
- 1286 110. Virtanen, P. *et al.* SciPy 1.0: fundamental algorithms for scientific computing in Python.  
1287 *Nat. Methods* **17**, 261–272 (2020).
- 1288 111. Mathys, H. *et al.* Single-cell transcriptomic analysis of Alzheimer’s disease. *Nature* **570**,  
1289 332–337 (2019).
- 1290 112. Stuart, T. *et al.* Comprehensive Integration of Single-Cell Data. *Cell* **177**, 1888–1902.e21  
1291 (2019).
- 1292 113. Hafemeister, C. & Satija, R. Normalization and variance stabilization of single-cell RNA-  
1293 seq data using regularized negative binomial regression. *Genome Biol.* **20**, 296 (2019).
- 1294 114. McInnes, L., Healy, J. & Melville, J. UMAP: Uniform Manifold Approximation and  
1295 Projection for Dimension Reduction. *ArXiv180203426 Cs Stat* (2020).
- 1296 115. Mathys, H. *et al.* Single-cell transcriptomic analysis of Alzheimer’s disease. *Nature* **570**,  
1297 332–337 (2019).
- 1298 116. Bonett, D. G. & Wright, T. A. Sample size requirements for estimating pearson, kendall  
1299 and spearman correlations. *Psychometrika* **65**, 23–28 (2000).
- 1300 117. Elsworth, B. *et al.* The MRC IEU OpenGWAS data infrastructure. *bioRxiv*  
1301 2020.08.10.244293 (2020) doi:10.1101/2020.08.10.244293.
- 1302 118. Ng, B. *et al.* An xQTL map integrates the genetic architecture of the human brain’s  
1303 transcriptome and epigenome. *Nat. Neurosci.* **20**, 1418–1426 (2017).
- 1304 119. Guelfi, S. *et al.* Regulatory sites for splicing in human basal ganglia are enriched for  
1305 disease-relevant information. *Nat. Commun.* **11**, 1041 (2020).
- 1306

## 1307 **Figure Legends**

1308 **Figure 1. Overview of the study.** We downloaded publicly available RNA-seq and genotype  
1309 data from 15 different datasets consisting 8,727 RNA-seq measurements from 7 main brain  
1310 regions in 6,518 individuals. We performed *cis*-, *trans*- and interaction-eQTL analysis, built a  
1311 brain-specific gene coregulation network and prioritized genes using Mendelian randomization,  
1312 colocalization and the co-regulation network.

1313

1314 **Figure 2. Overview of the datasets.** (A) The number of samples per included cohort, with each  
1315 color representing one of the 7 major brain regions. (B) The number of genotypes per cohort,  
1316 with each color representing a population. (C) The number of individuals per cohort, with each  
1317 color representing an eQTL dataset. The number of individuals is different from the intersection  
1318 between the number of RNA-seq samples and number of genotypes, because not all samples  
1319 with genotypes have RNA-seq samples and vice-versa, and some individuals with genotypes  
1320 have multiple RNA-seq measurements. (D) PCA dimensionality reduction plot of the normalized  
1321 expression data after covariate correction. Each dot represents an RNA-seq sample and is colored  
1322 by brain region. The figure shows that the samples cluster mainly on brain region.

1323

1324 **Figure 3. Conditional *cis*-eQTLs.** (A) The number of conditional *cis*-eQTLs per eQTL dataset.  
1325 (B) Comparison of characteristics between primary and non-primary eQTLs, where each row  
1326 compares the eQTL genes for that rank with eQTL genes from the previous rank. P-values are  
1327 calculated using a Wilcoxon test between significant and non-significant genes. (left) The  
1328 difference in mean gene expression levels; (middle) the difference in distance between the most  
1329 significant SNP-gene combination and the transcription start site (TSS); (right) the difference in  
1330 probability for loss of function intolerance (pLI) score. For primary, secondary and quaternary  
1331 eQTLs, non-significant eQTLs have higher pLI scores. (C) Replication of primary *cis*-eQTLs  
1332 between the cortex eQTLs of different ethnicities and (D) the different brain regions for the  
1333 European datasets. n indicates sample size of each dataset. Numbers in boxes indicate the  
1334 number of eQTLs that are significant in both the discovery and the replication dataset, and the  
1335 percentage of those that shows the same direction of effect. (E) Replication of primary *cis*-  
1336 eQTLs of Cortex-EUR (discovery) in all the GTEx tissues (replication). Each dot is a different  
1337 GTEx tissue, the x-axis is the number of eQTLs that is significant in both discovery and  
1338 replication, and the y-axis is the percentage that shows the same direction of effect.

1339

1340 **Figure 4. Cell type interacting eQTLs.** (A) Spearman correlations between the 5 predicted cell  
1341 count proportions. Lower triangle is within cortex samples, upper triangle is within cerebellum  
1342 samples. (B) Predicted cell type proportions (x-axis) compared to cell type proportions measured  
1343 using immunohistochemistry (IHC; y-axis) for 42 ROSMAP samples. Values in the plot are  
1344 Pearson correlation coefficients. Cell count predictions for most cell types closely approximates  
1345 actual IHC cell counts, although neurons are underestimated. (C) Number of cell type interacting  
1346 eQTLs for Cortex-EUR deconvoluted cell types. The majority of interactions are with neurons

1347 and oligodendrocytes. Notably, most interactions are unique for one cell type in 90% of the  
1348 cases. **(D, E, F)** Replication of cell type interacting eQTLs for *STMN4* **(D)**, *FAM221A* **(E)** and  
1349 *SLC25A27* **(F)**, consisting of the scatterplot of the interaction eQTL in *MetaBrain* Cortex-EUR  
1350 bulk RNA-seq (left) and a forest plot for the eQTL effect in the ROSMAP snRNA-seq data  
1351 (right). Scatterplot: the x-axis shows the estimated cell type proportion, the y-axis shows the  
1352 gene expression, each dot represents a sample. Colors indicate SNP genotype, with yellow being  
1353 the minor allele. Values under the alleles are Spearman correlation coefficients. Forest plot:  
1354 Spearman coefficients with effect direction relative to the minor allele when replicating the  
1355 eQTL effect in ROSMAP single nucleus data (n=38). Error bars indicate 95% confidence  
1356 interval. Each row denotes a cell type specific dataset: excitatory neurons (EX), oligodendrocytes  
1357 (OLI), inhibitory neurons (IN), astrocytes (AST), oligodendrocyte precursor cells (OPC),  
1358 microglia (MIC), pericytes (PER) and endothelial cells (END). Cell types highlighted in bold  
1359 reflect the equivalent to the cell type used in the interaction eQTL.

1360

1361 **Figure 5. Mendelian randomization and colocalization of brain-related traits.** **(A)** Number  
1362 of significant Mendelian randomization (MR) signals (blue) and those with both MR and Coloc  
1363 significant signals for 15 brain-related traits. **(B)** SNP and effect allele (EA), eQTL beta and  
1364 GWAS odds ratio for 20 multiple sclerosis (MS) genes that are both MR and Coloc significant,  
1365 and their Wald ratio p-value. Cell type interaction eQTL for *CYP24A1* **(D)** and *CLECL1* **(E)**,  
1366 showing interactions with predicted neuron, and macrophage proportions respectively. The x-  
1367 axis shows the estimated cell type proportion, the y-axis shows the gene expression, each dot  
1368 represents a sample. Colors indicate SNP genotype, with yellow being the MS risk allele. Values  
1369 under the alleles are Spearman correlation coefficients.

1370

1371 **Figure 6. Trans-eQTLs in brain.** **(A)** Location of identified *trans*-eQTLs, with the SNP  
1372 position (x-axis) and gene position (y-axis) in the genome. Size of the dots indicate the p-value  
1373 of the *trans*-eQTL (larger is more significant). 7p21.3, the locus with most (83%) of the *trans*-  
1374 eQTLs, is highlighted. **(B)** Three SNPs in the 7p21.3 locus and the number of datasets and  
1375 number of up- and down-regulated *trans*-eQTL genes each SNP has. For rs1990622, a SNP  
1376 associated with frontotemporal lobar degeneration, the 35 genes it affects in *trans* and the 1 gene  
1377 it affects in *cis* are shown. **(C)** Two examples of convergent effects, where multiple independent  
1378 SNPs affect the same genes in *trans*. Left: *trans*-eQTLs of rs1427407 and rs4895441 on *HBG2*  
1379 and right *trans*-eQTL of rs930263, rs2604551, and rs10950398 on *KCNA5*.

1380

1381 **Figure 7. Gene co-regulation** **(A)** Genes that are co-regulated with genes that are within  
1382 amyotrophic lateral sclerosis (ALS) loci. Co-regulation scores between genes are calculated  
1383 using all *MetaBrain* samples, *MetaBrain* cerebellum samples, or *MetaBrain* cortex samples.  
1384 Except for *URB4*, cortex and cerebellum networks find different co-regulated genes for ALS. **(B)**  
1385 Co-regulation network using all *MetaBrain* samples for all genes prioritized for ALS by  
1386 *Downstreamer*. **(C)** Top 5 Human Phenotype Ontology (HPO) enrichments for the

1387 *Downstreamer* prioritized ALS genes. **(D)** Genes that are co-regulated with genes that are within  
1388 multiple sclerosis loci. Co-regulation scores between genes are calculated using a heterogeneous  
1389 multi-tissue network, *MetaBrain* cerebellum samples, or *MetaBrain* cortex samples. Most genes  
1390 are found using a large heterogeneous co-regulation network. **(E)** Co-regulation network of all  
1391 *MetaBrain* samples for 33 genes prioritized by *Downstreamer* in cortex. Colors indicate the  
1392 neutrophin signaling pathway enrichment Z-scores. **(F)** Top 5 KEGG enrichments for the  
1393 *Downstreamer* prioritized multiple sclerosis genes in cortex.

1394



## 1395 **Supplementary Figure Legends**

1396

1397 **Supplementary Figure 1. European Nucleotide Archive brain sample selection. (A)**  
1398 Principal component (PC) analysis on the expression data of 74,052 samples included in the  
1399 SkyMap database shows clustering on tissue type but also many outliers with high PC1 scores.  
1400 **(B)** Coloring on single and paired-end sequencing shows no clear clustering. **(C)** Coloring single  
1401 cell identifies the samples with high PC1 scores as single-cell samples. **(D)** Mean % reads  
1402 mapped, number of reads, and max reads per bin of PC1. **(E)** Re-calculation of PCs on all  
1403 samples with PC score <0 in panel A-D, after covariate correction. **(F)** Brain and Tissue score  
1404 calculated by correlating expression of known tissue and brain samples to each of the PCs. **(G)**  
1405 As panel F, cancer score was calculated by correlating expression of known cancer genes to all  
1406 PCs.

1407

1408 **Supplementary Figure 2. RNA-seq alignment QC.** The two main RNA-seq QC metrics used  
1409 for filtering samples. **(A)** Percentage coding bases colored by dataset and **(B)** percentage of reads  
1410 aligned colored per dataset. Red dotted line is the threshold for filtering (10% for coding bases  
1411 and 60% for percentage reads aligned respectively). Triangles are samples filtered out by any of  
1412 the RNA-seq QC metrics.

1413

1414 **Supplementary Figure 3. Sample filtering by PCA.** Principal component analysis (PCA) plot  
1415 before normalization and covariate removal. For all plots the red line indicates 4 standard  
1416 deviations from the mean and red dots are samples to be filtered out. **(A)** PCA on all samples  
1417 after removing alignment QC outliers. **(B)** PCA on samples after removal of outlier samples  
1418 from A. **(C)** PCA on samples after removal of outlier samples of A and B.

1419

1420 **Supplementary Figure 4. PCA before and after covariate correction. (A)** PC1 and PC2 on  
1421 normalized expression data before covariate correction, colored on dataset. **(B)** PC1 and PC2 on  
1422 normalized expression data after covariate correction.

1423

1424 **Supplementary Figure 5. Assigning ethnicity through principal component analysis.** For  
1425 each of the included datasets principal component (PC) scores are calculated on their genotypes.  
1426 Samples are clustered with the 1000 genome samples (left). Right panels show dataset genotype  
1427 samples without 1000g samples on the right projected on the same PCs. Using k-nearest  
1428 neighbors clustering, samples are assigned an ethnicity based on their closeness to the 1000g  
1429 samples of a population.

1430

1431 **Supplementary Figure 6. eQTL Z-score comparison between datasets.** The pairwise  
1432 spearman correlation and concordance of direction of the eQTL Z-scores between all cohorts,  
1433 and between each cohort and the meta-analysis Z-score. As two examples, **(A)** shows the Z-score  
1434 comparison between Cortex-EUR eQTL datasets EUR-LIBD\_h650 and EUR-UCLA\_ASD, and  
1435 **(B)** shows the Z-score comparison between the meta-analysis Z-score and the Cortex-EUR  
1436 cohort EUR-AMPAD-ROSMAP-V2. **(C)** shows the correlation for each pairwise combination of  
1437 cohorts between each other (small dots), and with the meta-analysis Z-scores (large dots). **(D)**  
1438 shows the directional concordance for each pairwise combination of cohorts between each other  
1439 (small dots), and with the meta-analysis Z-scores (large dots). The dots in **(C)** and **(D)** that  
1440 correspond to the **(A)** and **(B)** plots are shown by the grey dotted lines.

1441

1442 **Supplementary Figure 7. Reads mapping on patch chromosome version of MAPT.** Number  
1443 of reads mapped to the MAPT gene located on the primary assembly (ENSG00000186868) and  
1444 the MAPT genes located on the patch chromosomes (ENSG00000276155 and  
1445 ENSG00000277956). Each dot is an individual, and the color shows if they are homozygous  
1446 reference (0/0), heterozygous (0/1), or homozygous alternative (1/1) for a SNP (rs34619181)  
1447 located in the MAPT gene. Left plot compares counts mapped to ENSG00000186868 (ref) to  
1448 those mapped to ENSG00000276155 (patch), middle plot compares ENSG00000186868 (ref)  
1449 and ENSG00000277956 (patch), right plot compares ENSG00000276155 (patch) and  
1450 ENSG00000277956 (patch).

1451

1452 **Supplementary Figure 8. EQTL z-scores in the MAPT locus.** Z-scores (y-axis) of the MAPT  
1453 locus (x-axis) for all the datasets used in the Cortex-EUR meta-analysis. Left upper plot shows  
1454 the meta-analysis Z-score. Blue dots are the SNPs that are in high LD with the top SNP.

1455

1456 **Supplementary Figure 9. Colocalization locus plot for MAPT.** Y-axis shows the  
1457 colocalization  $\log_{10}(-p\text{-value})$ . X-axis shows the position of the SNPs (dots). Color is the LD  
1458 with rs56240678.

1459

1460 **Supplementary Figure 10. (A)** Mean of  $\log_2$  of the expression (x-axis) and standard deviation of  
1461 the  $\log_2$  of expression for primary, secondary, tertiary, and quaternary eQTL genes. eQTLs that  
1462 have only one independent SNP effect have higher mean expression but lower standard deviation  
1463 than genes with multiple independent effects. **(B)** g:profiler enrichment for all genes with a  
1464 single independent eQTL effect. **(C)** g:profiler enrichment for all genes with multiple  
1465 independent eQTL effects.

1466

1467 **Supplementary Figure 11. Properties of cerebellum specific eQTLs.** **(A)** UpSet plot of the  
1468 number of eQTL genes per brain region for European datasets. **(B)** The distribution of

1469  $\log_2(\text{TMM}+1)$  expression in cortex (x-axis) and cerebellum (y-axis) of the 846 eQTL genes that  
1470 were only significant in cerebellum. Blue line is the minima of the bimodal distribution and is  
1471 used as cut-off point in panel **C**. **(C)** The expression in cortex (x-axis) and cerebellum (y-axis) of  
1472 the 846 eQTL genes that were only significant eQTLs in cerebellum. The blue line is the cut-off  
1473 from panel **B**. **(D)** The expression (dots) and standard deviation (lines) of the transcription  
1474 factors that are enriched for binding to transcription sites around the 662 genes for cortex (x-  
1475 axis) and cerebellum (y-axis). The 5 transcription factors that are labelled are lower expressed in  
1476 cortex and higher expressed in cerebellum.

1477

1478 **Supplementary Figure 12. Cortex primary eQTL replication in GTEx.** The replication  
1479 between primary *cis*-eQTLs of Cortex-EUR (discovery) with all the GTEx tissues (replication).  
1480 The x-axis is the number of eQTLs that is significant in both discovery and replication, and the  
1481 y-axis is the percentage that shows the same direction of effect.

1482

1483 **Supplementary Figure 13.** Comparison of meta-analysis Z-scores for eQTLs detected in the  
1484 different *MetaBrain* datasets (x-axis), and eQTLgen (y-axis).

1485

1486 **Supplementary Figure 14. Distribution of predicted cell proportions.** The distribution of the  
1487 predicted cell proportions (x-axis) for cortex and cerebellum samples (y-axis).

1488

1489 **Supplementary Figure 15. Cell type proportions per brain region are comparable, with the**  
1490 **exception of the spinal cord.** Visualization of the cell type proportions with one row per cell  
1491 type and colors indicating brain region. **(A)** Density plot where the x-axis shows the predicted  
1492 cell type proportion, and the y-axis shows the frequency. **(B)** Boxplot of the predicted cell type  
1493 proportion. Boxes represent the 25<sup>th</sup> and 75<sup>th</sup> percentiles and internal line represents the median.  
1494 The whiskers represent 1.5 multiplied by the inter-quartile range. Outliers are shown as  
1495 individual points.

1496

1497 **Supplementary Figure 16. Cell type fractions per brain tissue shows little differences with**  
1498 **the exception of the spinal cord.** Visualization of the cell type proportions with one row per  
1499 brain region and colors indicating cell types. **(A)** Density plot where the x-axis shows the  
1500 predicted cell type proportion, and the y-axis shows the frequency. **(B)** Boxplot of the predicted  
1501 cell type proportion. Boxes represent the 25<sup>th</sup> and 75<sup>th</sup> percentiles and internal line represents the  
1502 median. The whiskers represent 1.5 multiplied by the inter-quartile range. Outliers are shown as  
1503 individual points.

1504



1505 **Supplementary Figure 17. Cell type mediated eQTLs in cerebellum are mostly mediated by**  
1506 **astrocytes and macrophages.** The number of cell type interacting eQTLs for cerebellum  
1507 deconvoluted cell types. We did not identify eQTLs that were shared between cell types.

1508

1509 **Supplementary Figure 18. Replication of cortex *cis*-eQTLs in snRNA-seq data.** Each figure  
1510 in this plot represents a comparison between bulk RNA-seq (y-axis) and single-nucleus RNA-seq  
1511 (x-axis). Each dot represents one *cis*-eQTL, and the legend shows the Pearson correlation  
1512 coefficient. Each column is a comparison between equivalent (and where not possible; similar)  
1513 cell types in both datasets. Each row illustrates a different filtering on which eQTLs are shown  
1514 and/or a different value on the y-axis. The x-axis always denotes the overall z-score of the eQTL  
1515 effect in the single nucleus dataset of that respective column. (A) Meta-analysis eQTL z-score  
1516 (y-axis) in Cortex-EUR bulk RNA-seq data, no filtering is applied. (B) Meta-analysis eQTL z-  
1517 score (y-axis) in Cortex-EUR bulk data, eQTLs are filtered based on the Decon-QTL Benjamini-  
1518 Hochberg corrected p-value <0.05 in each respective column. (C) same as row B but now  
1519 showing the log betas of the interaction model on the y-axis. (D) Meta-analysis eQTL z-score (y-  
1520 axis) in bulk data for eQTLs that are significantly replicating in each respective dataset. Dots are  
1521 colored if they are significantly cell type mediated (BH FDR<0.05) by the respective cell type in  
1522 bulk data. (E) y-axis shows the log betas of the interaction model (y-axis) and filtering eQTLs on  
1523 both significantly replicating in each respective dataset, as well as being significantly cell type  
1524 mediated in bulk data.

1525

1526 **Supplementary Figure 19. Bulk interacting eQTLs replicating in single-nucleus ROSMAP.**  
1527 Replication of cell type interaction eQTLs for *STMN4* (A), *FAM221A* (B), *NKAIN1* (C) and  
1528 *SCL25A27* (D). First column: Boxplots of the eQTL effect in Cortex-EUR bulk RNA-seq.  
1529 Second column: Cell type interacting eQTL effect in Cortex-EUR bulk RNA-seq. The x-axis  
1530 shows the estimated cell type proportion, the y-axis shows the gene expression, each dot  
1531 represents a sample, and the colors indicate the SNP genotype, with yellow being the minor  
1532 allele. Values under the alleles are Spearman correlation coefficients. Third column: Forest plot  
1533 of the spearman coefficient with effect direction relative to the minor allele when replicating the  
1534 eQTL effect in ROSMAP single nucleus data (n=38). Error bars indicate 95% confidence  
1535 interval. Each row denotes a cell type specific dataset: excitatory neurons (EX), oligodendrocytes  
1536 (OLI), inhibitory neurons (IN), astrocytes (AST), oligodendrocyte precursor cells (OPC),  
1537 microglia (MIC), pericytes (PER) and endothelial cells (END). The bold cell type corresponds to  
1538 the cell type that showed an interaction effect in bulk RNA-seq. Fourth column: Cell type  
1539 interacting eQTL effect in ROSMAP single-nucleus RNA-seq (n=38) of the bold highlighted cell  
1540 type in the third column.

1541

1542 **Supplementary Figure 20. Mendelian Randomization summary.** Each plot is for a different  
1543 trait (Intelligence, Intracranial volume, Putamen volume, Years of schooling, Alzheimer's  
1544 disease, Amyotrophic Lateral Sclerosis, Depression (broad), Frontotemporal Dementia,

1545 Parkinson's disease, Bipolar disorder, Generalized epilepsy, juvenile myoclonic epilepsy,  
1546 multiple sclerosis and schizophrenia). For each SNP the effect allele (EA) is given, the eQTL  
1547 beta of the EA on the given gene, the odds ratio (disease traits) or beta (quantitative traits) of the  
1548 EA on the phenotype, and the Wald ratio p-value of the mendelian randomization analysis.

1549

1550 **Supplementary Figure 21. Colocalization regional plots for five suggestive MR findings in**  
1551 **Cortex-EUR that were replicated in eQTLGen with allelic discordance.** Regional plots were  
1552 made for five MR findings (*CASS4* for Alzheimer's disease, *TMEM170B* for intelligence,  
1553 *GATAD2A* for schizophrenia and years of schooling, and *ZCWPWI* for years of schooling) in  
1554 Cortex-EUR (top), eQTLGen (middle) and outcome GWAS (bottom) to show colocalization.  
1555 These five findings all passed suggestive threshold ( $p < 5 \times 10^{-5}$ ) in Cortex-EUR, with eQTL  
1556 effects replicated in eQTLGen ( $p < 0.05$ ), showed colocalization for both Cortex-EUR and  
1557 eQTLGen but opposite directions of effect.

1558

1559 **Supplementary Figure 22. Colocalization regional plots for two suggestive MR findings for**  
1560 **multiple sclerosis that showed opposite directions of effect between Cortex-EUR and**  
1561 **eQTLGen.** Regional plots were made for two suggestive MR findings for MS (*KMT5A*,  
1562 *RNF19B*), both of which were suggestive signals in Cortex-EUR as well as eQTLGen ( $p < 5 \times 10^{-5}$ ).  
1563 Opposite directions of effect were observed between Cortex-EUR and eQTLGen but  
1564 colocalization was only found in Cortex-EUR.

1565

1566 **Supplementary Figure 23. Scatterplots comparing MR effects for multiple sclerosis derived**  
1567 **using instruments from the metabrain versus eQTLGen studies.** The top panel shows the  
1568 WR comparison on the same gene but with the different SNP instruments selected by each study  
1569 (matching on the top WR finding if gene instrumented with multiple SNPs in the study) and the  
1570 bottom panel the WR comparison between *MetaBrain* instruments and eQTLGen matching on  
1571 both the same gene and SNP instrument. Genes which showed opposite direction of WR effect  
1572 between *MetaBrain* and eQTLGen are colored in red and the genes with the same direction in  
1573 blue.

1574

1575 **Supplementary Figure 24. Log10 of median expression of brain and blood tissue samples in**  
1576 **GTEEx for 28 multiple sclerosis genes for which there are no significant eQTLgen instruments in**  
1577 **brain and blood.**

1578

1579 **Supplementary Figure 25. Cell type proportions in Alzheimer's disease patients.** Predicted  
1580 cell count proportions for the AMP-AD samples that were used in the Cortex-EUR eQTL  
1581 analysis for individuals with Alzheimer's disease and non-neurological controls. Each dot is the

1582 predicted cell proportion for one sample. Numbers under the boxplots indicate the number of  
1583 samples plotted. Values above the line are p-values from a t-test between groups.

1584

1585 **Supplementary Figure 26. Forest plots for rs1990622 trans-eQTLs.** Forest plots for each of  
1586 the *trans*-eQTL genes associated with rs1990622. Each plot shows the *trans*-eQTL beta and 95%  
1587 confidence interval for each of the included datasets and the meta-analysis. Effect directions are  
1588 relative to the A allele of rs1990622. Sizes of dots are relative to sample size of each dataset.  
1589 *Trans*-eQTL effects are most pronounced in AMP-AD datasets.

1590

1591 **Supplementary Figure 27. Summary of 7p21.3 locus trans-eQTLs.** (A) Forest plots showing  
1592 effect sizes for rs1990622 (yellow; beta and 95% confidence interval) for *cis*-eQTL gene  
1593 *THSD7A*, *trans*-eQTL gene *CALB2*, and association of rs1990622 with estimated neuron  
1594 proportion. Right panel shows average estimated neuron proportions per dataset (blue violin  
1595 plots). eQTL and neuron proportion associations are most pronounced in AMP-AD datasets,  
1596 while average neuron proportions are comparable. (B) *Trans*-eQTL meta-analysis Z-scores for  
1597 rs11974335, rs10950398 and rs1990622 (x-axis), and the correlation of those *trans*-eQTL genes  
1598 with predicted neuron proportion (y-axis) are highly correlated. (C) Comparison of *trans*-eQTL  
1599 Z-scores between Alzheimer's disease patients (x-axis) and neurotypical controls (y-axis) shows  
1600 that eQTL Z-scores are higher in patients.

1601

1602 **Supplementary Figure 28. Replication of cortex trans-eQTLs in single-nucleus data.** Each  
1603 figure in this plot represents a comparison between bulk RNA-seq (y-axis) and single-nucleus  
1604 RNA-seq (x-axis). Each dot represents one *trans*-eQTL, and the legend shows the Pearson  
1605 correlation coefficient. Each column is a comparison between equivalent (and where not  
1606 possible; similar) cell types in both datasets. Each row illustrates a different filtering on which  
1607 eQTLs are shown and/or a different value on the y-axis. The x-axis always denotes the overall z-  
1608 score of the eQTL effect in the single nucleus dataset of that respective column. (A) Meta-  
1609 analysis eQTL z-score (y-axis) in Cortex-EUR bulk RNA-seq data, no filtering is applied. (B)  
1610 Meta-analysis eQTL z-score (y-axis) in Cortex-EUR bulk data, eQTLs are filtered based on the  
1611 Decon-QTL Benjamini-Hochberg corrected p-value <0.05 in each respective column. (C) same  
1612 as row B but now showing the log betas of the interaction model on the y-axis. (D) Meta-analysis  
1613 eQTL z-score (y-axis) in bulk data for eQTLs that are significantly replicating in each respective  
1614 dataset. Dots are colored if they are significantly cell type mediated (BH FDR<0.05) by the  
1615 respective cell type in bulk data. (E) y-axis shows the log betas of the interaction model (y-axis)  
1616 and filtering eQTLs on both significantly replicating in each respective dataset, as well as being  
1617 significantly cell type mediated in bulk data.

1618

1619 **Supplementary figure 29. Comparison of AUC distribution for different eigenvector cut-**  
1620 **offs.** The quality of the gene network that we built for *MetaBrain* is measured by an AUC for

1621 each gene derived from a leave-one-out procedure. One of the parameters to build the network is  
1622 the number of eigenvectors to use after PCA over the gene correlation matrix. Here we show for  
1623 the 6 annotation categories (KEGG, REACTOME, GO Biological Process, GO Molecular  
1624 Function, GO Cellular Component, and HPO) the AUC mean (dot) and standard deviation (lines)  
1625 at different eigenvector cut-offs. The red dot and line indicate the eigenvector cut-off that was  
1626 used for that annotation category.

1627

1628 **Supplementary Figure 30. Heatmaps of the Pearson correlation of the AUC values between**  
1629 **different eigenvector cut-offs.** Correlation was calculated between the different eigenvector  
1630 cutoffs for the 6 annotation categories.

1631

1632 **Supplementary Figure 31. (A)** UMAP representation of heterogeneous gene network. Immune  
1633 and blood cell types show increased gene expression levels for genes prioritized using  
1634 *Downstreamer* for multiple sclerosis, while decreased expression is observed in brain related  
1635 tissues. **(B)** Within MetaBrain, those same genes show lower expression in cortex, but higher  
1636 expression in spinal cord and cerebellum.

1637

1638 **Supplementary Figure 32. Spearman correlation heatmap of predicted cell fractions versus**  
1639 **principal components calculated using all *MetaBrain* samples.** A heatmap showing the first  
1640 fifty principal components as the columns and the five cell types for which we predicted  
1641 proportions as rows. Each cell is colored based on the spearman correlation coefficients. Blue  
1642 denotes a negative correlation, red a positive correlation and white denotes no correlation.

1643

1644 **Supplementary Figure 33. SnRNA-seq visualization by cell type.** UMAP dimensionality  
1645 reduction plot of 39 snRNA-seq samples from ROSMAP. Each dot represents a single cell  
1646 (n=70,634). The dots are colored by their corresponding cell type: excitatory neurons (EX),  
1647 oligodendrocytes (OLI), inhibitory neurons (IN), astrocytes (AST), oligodendrocyte precursor  
1648 cells (OPC), microglia (MIC), pericytes (PER) and endothelial cells (END).

1649

1650 **Supplementary Figure 34. SnRNA-seq visualization by cell type.** UMAP dimensionality  
1651 reduction plot of 39 snRNA-seq samples from ROSMAP. Each dot represents a single cell  
1652 (n=70,634). The dots are colored by their corresponding cell type subcluster: excitatory neurons  
1653 (EX), oligodendrocytes (OLI), inhibitory neurons (IN), astrocytes (AST), oligodendrocyte  
1654 precursor cells (OPC), microglia (MIC), pericytes (PER) and endothelial cells (END).

1655

1656

1657 **Table descriptions**

1658 **Table 1. Prioritized genes from the Mendelian Randomization analysis on MetaBrain**  
1659 **eQTLs versus brain related outcomes.** Harmonized eQTL and GWAS SNP effects and single  
1660 SNP Wald Ratio estimates are reported in the table for all genes with Wald Ratio effects at  
1661  $P < 1.865 \times 10^{-7}$ . Columns are **genomic position**, **rsid** and **alleles** for SNP instrument (**EA**: Effect  
1662 allele. **NONEA**: non-effect allele. **proxy SNP**: rsid of proxy SNP replacement used for outcome  
1663 if instrument not present in GWAS), the SNP effects (**beta**, **SE**, **p**) for the MetaBrain eQTLs  
1664 followed by the SNP effects for the brain related outcomes and then the Wald Ratio effects.

1665

## 1666 **Supplementary Table descriptions**

### 1667 **Supplementary table 1. Number of samples and individuals.**

1668 **Sheet Genotype QC:** The number of genotype individuals and samples pre-QC (**column C-H**)  
1669 and post-QC (column I-N) for the different RNA-seq (**column A**) and genotype (**column B**)  
1670 datasets. Columns are: **PreQC:** Number of initial genotype samples processed for QC. **PostQC:**  
1671 Number of genotype samples left after QC filtering. **RNA-seq dataset:** Name of the complete  
1672 dataset. **Genotype dataset:** Name of the genotype dataset. Some datasets have multiple genotype  
1673 platforms, or multiple smaller datasets that are part of the larger RNA-seq dataset. **Individuals:**  
1674 The number of individuals per dataset. **EUR:** Number of genotype samples per dataset of  
1675 individuals of European population. **AFR:** Number of genotype samples per dataset of  
1676 individuals of African population. **EAS:** Number of genotype samples per dataset of individuals  
1677 of East-Asian population. **SAS:** Number of genotype samples per dataset of individuals of South-  
1678 Asian population. **AMR:** Number of genotype samples per dataset of individuals of Ad Mixed  
1679 American population.  
1680 **Sheet RNA-QC:** The number of RNA-seq samples at different steps of QC and for different  
1681 brain regions. Cells A2-F18 have the number of samples at different QC steps. Columns are:  
1682 **Dataset:** dataset name. **Number of RNA-seq samples:** Number of RNA-seq samples processed  
1683 to go through QC. **Alignment QC:** Number of RNA-seq samples left after filtering on alignment  
1684 QC (e.g. percent reads aligned). **RNA-seq PCA outliers - step 1:** Number of RNA-seq samples  
1685 left after filtering samples >4SD from mean of PC1. **RNA-seq PCA outliers - step 2:** Number of  
1686 samples left after recalculating PCA and again removing samples >4SD from mean of PC1.  
1687 **Covariate removal:** Number of samples left after covariate removal. **RNA Tissue grouping:**  
1688 the meta-data across different datasets uses different granularity of tissue annotation. Tissues  
1689 were grouped accordingly.

1690 **Sheet Sample Links:** RNA-seq samples linked to genotype samples. Left top: numbers of RNA-  
1691 seq sample linked to a genotype sample per dataset, per population. Top right: number of unique  
1692 individuals per dataset per population. Middle: number of uniquely linked individuals per  
1693 dataset, per population and per tissue group. Bottom: numbers of individuals used from each  
1694 dataset and population for *cis*- and *trans*-eQTL analysis.

1695

### 1696 **Supplementary table 2. Cis-eQTL summary statistics.**

1697 *Cis*-eQTL summary statistics listing index variant per gene (FDR<0.05). One sheet per eQTL  
1698 discovery dataset. Genomic positions are GRCh38. eQTL Rank: whether the eQTL is a primary,  
1699 secondary, tertiary, quaternary, or higher eQTL.

1700

1701 **Supplementary table 3. Number of *cis*- and *trans*-eQTLs.** For each dataset the number of *cis*-  
1702 and *trans*-eQTL SNPs, genes, and SNP-gene combinations found at FDR<0.05. Columns are:  
1703 **Basalganglia, Cerebellum, Cortex, Hippocampus, Spinalcord:** the five different brain regions  
1704 for which eQTL calling was done. **EUR:** Number of eQTLs with samples from European  
1705 population. **AFR:** Number of eQTLs with samples from African population. **EAS:** Number of



1706 eQTLs with samples from East-Asian population. **EUR+AFR, wo ENA, no PCA:** Number of  
1707 eQTLs with samples from EUR and AFR populations, excluding samples from the ENA cohorts,  
1708 and using gene expression levels that were not corrected for principal components.

1709

1710 **Supplementary table 4. Gene set enrichment summary statistics for primary and higher**  
1711 **rank eQTLs.** Gene set enrichment summary statistics generated using g:Profiler for genes  
1712 having a primary eQTL effect (sheet Primary eQTL), and those also having a secondary eQTL  
1713 (sheet Non-primary eQTL).

1714

1715 **Supplementary table 5.** Gene set enrichment summary statistics generated using g:Profiler for  
1716 genes having an eQTL effect in cerebellum.

1717

1718 **Supplementary table 6. GTEx cis-eQTL replication.** Replication between *cis*-eQTLs of  
1719 different *MetaBrain* regions and all GTEx tissues. Discovery was performed in each *MetaBrain*  
1720 dataset while excluding GTEx, and then replicated in each GTEx tissue. **Tested eQTLs:** those  
1721 eQTLs that were also present in the GTEx dataset. **Proportion shared and FDR<0.05:**  
1722 proportion of tested eQTLs that was also significant in GTEx. **Concordant and FDR<0.05:**  
1723 number of tested eQTLs that was also significant and for which the allelic direction was  
1724 concordant. **Concordance:** proportion of concordant tested and significant eQTLs.

1725

1726 **Supplementary table 7. eQTLgen cis-eQTL replication.** *MetaBrain cis*-eQTLs (FDR<0.05) as  
1727 discovery cohort and eQTLgen eQTLs as replication cohort. Top table: FDR<0.05 in *MetaBrain*  
1728 discovery only (FDR<1 in eQTLGen). Bottom table: FDR<0.05 in both *MetaBrain* and  
1729 eQTLgen datasets. **Shared:** number of shared eQTLs. **Concordant:** number of shared eQTLs  
1730 that has the same allelic direction of effect. **Concordant over total:** proportion of concordant  
1731 eQTLs over the total number of eQTLs discovered. **Concordant over shared:** proportion of  
1732 concordant eQTLs over number of shared eQTLs.

1733

1734 **Supplementary table 8. Cell type deconvolution summary statistics.** **Sheet cortex:** All  
1735 Decon-eQTL results for cortex. **Sheet cerebellum:** All Decon-eQTL results for cerebellum.  
1736 Columns for both sheets are: **Gene:** deconvoluted eQTL gene ensembl ID. **Gene symbol:**  
1737 deconvolution eQTL gene symbol. **SNP:** deconvoluted eQTL SNP. **Alleles:** SNP alleles. **Effect**  
1738 **Allele:** the allele to which the betas are directed. **Columns ending with p-value:** p-value for the  
1739 cell-type interaction. **Columns ending with beta:** beta for the cell-type proportion term.  
1740 **Columns ending with beta:GT:** beta for the genotype x cell-type interaction term.

1741

1742 **Supplementary table 9 Replication of the MetaBrain cortex primary *cis*-ieQTLs in**  
1743 **ROSMAP single-nucleus data.** For each of the deconvoluted cell-types, the FDR and betas are  
1744 listed. For each of the cell types in the single nucleus data, the FDR and eQTL Z-scores are  
1745 listed. All betas and Z-scores are relative to the Effect Allele.

1746

1747 **Supplementary table 10. eQTL SNPs in linkage disequilibrium with GWAS SNPs.** The  
1748 GWAS SNPs that are in high linkage disequilibrium (LD) with the *cis*-eQTL SNPs. Each sheet is  
1749 a different *metabrain* eQTL datasets from EUR populations. The sheet Included Traits lists  
1750 GWAS traits that were tested. Columns are: **eQTL rank:** the rank of conditional eQTLs  
1751 (1=primary, 2=secondary, etc). **GWASID:** GWAS ID of the GWAS SNP. **Trait:** Name of the  
1752 GWAS trait. **Index variant:** the GWAS variant. **Index Variant P:** GWAS p-value. **Index**  
1753 **Variant Alleles:** Alleles of the GWAS variant. **Index Variant Effect:** GWAS effect. **Linked**  
1754 **eQTL SNP:** the eQTL SNP. **LD(rsq):** the LD  $r^2$ . **LinkedEQTLEGenes:** the eQTL genes that the  
1755 linked SNP affects. **Linked eQTL Gene Symbols:** HGNC name of the linked genes. **Linked**  
1756 **eQTL Alleles:** Alleles of the eQTL SNP. **Linked eQTL Effect Allele:** The allele that is related  
1757 to the effect direction. **Linked eQTL Zscores:** Z-scores of the eQTL effect. **Linked eQTL P:**  
1758 p-value of the eQTL effect. **GWAS Cluster Size:** Number of GWAS SNPs in LD with Index  
1759 Variant. **SNPs In GWAS Cluster:** SNPs that are in LD with the Index Variant.

1760

1761 **Supplementary table 11. List of traits used in Mendelian randomization and colocalization**  
1762 **analysis.**

1763

1764 **Supplementary table 12 eQTL SNPs which showed evidence of genetic colocalization with**  
1765 **tested brain-related traits. ID, Chromosome, Position, SNP, Effect Allele, Non Effect Allele:**  
1766 Position of instrumenting SNP with effect allele used during the harmonization procedure. **Proxy**  
1767 **used, Proxy SNP:** whether proxy lookup had to be performed to find SNP in outcome GWAS  
1768 and the rsid of the proxy used. **MetaBrain SNP effects:** gene name and summary statistics for  
1769 the instrument-exposure SNP association (*MetaBrain* eQTL). **Outcome SNP effects:** outcome  
1770 name (neurological trait) and summary statistics for the harmonized instrument-outcome SNP  
1771 association. **MR effects:** single SNP Wald ratio effect between the instrumented eQTL and  
1772 neurological outcome. **Coloc results:** colocalization probability of both traits sharing the same  
1773 causal variant in the region. **Decon-QTL results: eQTL SNP:** the SNP that was tested for cell  
1774 type mediated effects. In some cases a SNP which is in high LD with the instrument SNP is used  
1775 for Decon-QTL. **LD R-squared:** the LD between SNP and eQTL SNP. Columns listing Decon-  
1776 QTL results: **beta:** the beta of the interaction term in the Decon-QTL model with respect to the  
1777 Effect Allele column. **FDR:** the Benjamini-Hochberg corrected interaction p-value. **Mendelian**  
1778 **Disorders:** overlap of genes with Development Disorder Genotype - Phenotype Database  
1779 (DDG2P) and OrphaNet.

1780



1781 **Supplementary Table 13. Colocalization results for latest AD GWAS loci with *MetaBrain***  
1782 **Cortex-EUR primary eQTLs** (columns **A to P** were adapted from Schwartzentruber *et al.* for  
1783 comparisons and **columns Q to Y** are *MetaBrain* findings. **Category - 1:** previously identified  
1784 and replicated in *MetaBrain* Cortex-EUR, **2:** novel results found by *MetaBrain* Cortex-EUR, **3:**  
1785 previously identified but not replicated in *MetaBrain* Cortex-EUR.

1786

1787 **Supplementary table 14. Mendelian Randomization comparison between *MetaBrain* and**  
1788 **eQTLGen on multiple sclerosis outcome.** (a) Wald Ratio comparison on the same gene using  
1789 different SNP instruments. For this analysis, the Wald Ratio effects for the top hit eQTL for  
1790 each gene within each study were compared. (b) Wald Ratio comparison on the same gene  
1791 fixing on the same eQTL instrument between studies. For this analysis, the eQTLGen Wald  
1792 Ratios were re-derived using the second Taylor expansion error term on the same SNP  
1793 instruments as *MetaBrain*.

1794

1795 **Supplementary table 15. Colocalization of MR suggestive hits with high LD but allelic**  
1796 **discordance.** This table displays the colocalization results for 31 suggestive MR findings from  
1797 Cortex-EUR with eQTL instruments replicated in eQTLGen ( $p < 0.05$ ) but allelic discordance  
1798 (opposite directionalities of alleles). Highlighted rows are findings with colocalization in both  
1799 Cortex-EUR and eQTLGen.

1800

1801 **Supplementary table 16. Comparison of MR suggestive hits for MS between *metaBrain***  
1802 **and eQTLGen.** This table displays 157 suggestive MR signals for multiple sclerosis in Cortex-  
1803 EUR and the replication MR and colocalization results of corresponding genes in eQTLGen.

1804

1805 **Supplementary table 17. *Trans*-eQTL summary statistics.** Sheet *Trans*-eQTLs: all *trans*-  
1806 eQTLs detected in this study ( $FDR < 0.05$ ). **Percentage cross-mapping:** percentage of the gene  
1807 that can be mapped within 5Mb of the *trans*-eQTL SNP. Sheet *Trans*-eQTLs no crossmap: *trans*-  
1808 eQTLs that remain significant after cross-mapping eQTLs have been removed. Sheet *Trans*-  
1809 eQTLs with *cis* per trait: in this sheet, *trans*-eQTLs are annotated with *cis*-eQTLs for the same  
1810 SNP, and subsequently split per trait annotation for the SNP. Consequently, a single *trans*-eQTL  
1811 may be represented by multiple rows. Sheet Convergent *trans*-eQTLs: genes on which multiple  
1812 independent loci have a *trans*-eQTL, split per annotated trait. Sheet TraitsAndNrOfSNPs: list of  
1813 traits included in the analysis, and the number of included SNPs per trait.

1814

1815 **Supplementary table 18. Summary statistics for associations between SNPs and predicted**  
1816 **cell-type proportions.** Sheet Cortex-EUR: associations ( $FDR < 0.05$ ) while limiting to Cortex-  
1817 EUR samples. Sheet Cortex-EUR+AFR-woENA: associations ( $FDR < 0.05$ ) for the analysis  
1818 including AFR samples, but excluding ENA samples.

1819

1820 **Supplementary table 19. Differences in predicted neuron proportions between included**  
1821 **datasets.** T-test p-values comparing neuron proportions for pairwise comparisons between the  
1822 datasets included in the *trans*-eQTL analysis.

1823

1824 **Supplementary table 20. Gene-cell count correlations and 7p21.3 *trans*-eQTL Z-scores.**  
1825 *Trans*-eQTL Z-scores for three SNPs (rs11974335, rs10950398, and rs1990622), and  
1826 correlations of the *trans*-eQTL genes with predicted neuron proportions.

1827

1828 **Supplementary table 21. Gene set enrichments for 7p21.3 *trans*-eQTL genes.** Gene set  
1829 enrichments calculated using g:Profiler. Sheet downregulated genes: gene set enrichments for  
1830 genes that show downregulation due to the 7p21.3 *trans*-eQTL effect alleles. Sheet upregulated  
1831 genes: gene set enrichments for genes that show upregulation due to the 7p21.3 *trans*-eQTL  
1832 effect alleles.

1833

1834 **Supplementary table 22. Replication of the MetaBrain cortex primary *trans*-ieQTLs in**  
1835 **ROSMAP single-nucleus data.** For each of the deconvoluted cell-types, the FDR and betas are  
1836 listed. For each of the cell types in the single nucleus data, the FDR and eQTL Z-scores are  
1837 listed. All betas and Z-scores are relative to the Effect Allele.

1838

1839 **Supplementary table 23. Downstreamer results for amyotrophic lateral sclerosis in EUR**  
1840 **and Asian populations.** Sheet overview: lists set of ontologies tested for this phenotype. Sheet  
1841 GenePrioritization\_MetaBrain: gene prioritization performed in all *MetaBrain* samples. Sheet  
1842 GenePrioritization\_MetaBrainCortexOnly: gene prioritization performed in *MetaBrain* cortex  
1843 samples. GenePrioritization\_MetaBrainCerebellumOnly: gene prioritization performed in  
1844 *MetaBrain* cerebellum samples. Sheets Reactome\_MetaBrain, GO\_BP\_MetaBrain,  
1845 GO\_CC\_MetaBrain, GO\_MF\_MetaBrain, KEGG\_MetaBrain, and HPO\_MetaBrain: gene set  
1846 enrichments for coregulated genes identified using Downstreamer. Sheets  
1847 Expression\_MetaBrain, Expression\_HCA, and GtexV8\_relative: expression enrichment using all  
1848 *MetaBrain* samples, Human Cell Atlas, and GTEx v8.

1849

1850 **Supplementary table 24. Downstreamer results for Parkinson's disease.** Sheet overview:  
1851 lists set of ontologies tested for this phenotype. Sheet GenePrioritization\_MetaBrain: gene  
1852 prioritization performed in all *MetaBrain* samples. Sheet  
1853 GenePrioritization\_MetaBrainCortexOnly: gene prioritization performed in *MetaBrain* cortex  
1854 samples. GenePrioritization\_MetaBrainCerebellumOnly: gene prioritization performed in  
1855 *MetaBrain* cerebellum samples. Sheets Reactome\_MetaBrain, GO\_BP\_MetaBrain,

1856 GO\_CC\_MetaBrain, GO\_MF\_MetaBrain, KEGG\_MetaBrain, and HPO\_MetaBrain: gene set  
1857 enrichments for coregulated genes identified using Downstreamer. Sheets  
1858 Expression\_MetaBrain, Expression\_HCA, and GtexV8\_relative: expression enrichment using all  
1859 MetaBrain samples, Human Cell Atlas, and GTEEx v8.

1860

1861 **Supplementary table 25. Downstreamer results for schizophrenia.** Sheet overview: lists set  
1862 of ontologies tested for this phenotype. Sheet GenePrioritization\_MetaBrain: gene prioritization  
1863 performed in all *MetaBrain* samples. Sheet GenePrioritization\_MetaBrainCortexOnly: gene  
1864 prioritization performed in *MetaBrain* cortex samples.  
1865 GenePrioritization\_MetaBrainCerebellumOnly: gene prioritization performed in *MetaBrain*  
1866 cerebellum samples. Sheets Reactome\_MetaBrain, GO\_BP\_MetaBrain, GO\_CC\_MetaBrain,  
1867 GO\_MF\_MetaBrain, KEGG\_MetaBrain, and HPO\_MetaBrain: gene set enrichments for  
1868 coregulated genes identified using Downstreamer. Sheets Expression\_MetaBrain,  
1869 Expression\_HCA, and GtexV8\_relative: expression enrichment using all MetaBrain samples,  
1870 Human Cell Atlas, and GTEEx v8.

1871

1872 **Supplementary table 26. Downstreamer results for Alzheimer's disease.** Sheet overview:  
1873 lists set of ontologies tested for this phenotype. Sheet GenePrioritization\_MetaBrain: gene  
1874 prioritization performed in all *MetaBrain* samples. Sheet  
1875 GenePrioritization\_MetaBrainCortexOnly: gene prioritization performed in *MetaBrain* cortex  
1876 samples. GenePrioritization\_MetaBrainCerebellumOnly: gene prioritization performed in  
1877 *MetaBrain* cerebellum samples. Sheets Reactome\_MetaBrain, GO\_BP\_MetaBrain,  
1878 GO\_CC\_MetaBrain, GO\_MF\_MetaBrain, KEGG\_MetaBrain, and HPO\_MetaBrain: gene set  
1879 enrichments for coregulated genes identified using Downstreamer. Sheets  
1880 Expression\_MetaBrain, Expression\_HCA, and GtexV8\_relative: expression enrichment using all  
1881 MetaBrain samples, Human Cell Atlas, and GTEEx v8.

1882

1883 **Supplementary table 27. Downstreamer results for multiple sclerosis.** Sheet overview: lists  
1884 set of ontologies tested for this phenotype. Sheet GenePrioritization\_MetaBrain: gene  
1885 prioritization performed in all *MetaBrain* samples. Sheet  
1886 GenePrioritization\_MetaBrainCortexOnly: gene prioritization performed in *MetaBrain* cortex  
1887 samples. GenePrioritization\_MetaBrainCerebellumOnly: gene prioritization performed in  
1888 *MetaBrain* cerebellum samples. Sheets Reactome\_MetaBrain, GO\_BP\_MetaBrain,  
1889 GO\_CC\_MetaBrain, GO\_MF\_MetaBrain, KEGG\_MetaBrain, and HPO\_MetaBrain: gene set  
1890 enrichments for coregulated genes identified using Downstreamer. Sheets  
1891 Expression\_MetaBrain, Expression\_HCA, and GtexV8\_relative: expression enrichment using all  
1892 MetaBrain samples, Human Cell Atlas, and GTEEx v8.

1893

1894 **Supplementary table 28. Downstreamer results for amyotrophic lateral sclerosis in EUR**  
1895 **population.** Sheet overview: lists set of ontologies tested for this phenotype. Sheet  
1896 GenePrioritization\_MetaBrain: gene prioritization performed in all *MetaBrain* samples. Sheet  
1897 GenePrioritization\_MetaBrainCortexOnly: gene prioritization performed in *MetaBrain* cortex  
1898 samples. GenePrioritization\_MetaBrainCerebellumOnly: gene prioritization performed in  
1899 *MetaBrain* cerebellum samples. Sheets Reactome\_MetaBrain, GO\_BP\_MetaBrain,  
1900 GO\_CC\_MetaBrain, GO\_MF\_MetaBrain, KEGG\_MetaBrain, and HPO\_MetaBrain: gene set  
1901 enrichments for coregulated genes identified using Downstreamer. Sheets  
1902 Expression\_MetaBrain, Expression\_HCA, and GtexV8\_relative: expression enrichment using all  
1903 *MetaBrain* samples, Human Cell Atlas, and GTEx v8.

1904

1905 **Supplementary table 29. ENA accession IDs.** List of study accession IDs collected from  
1906 European Nucleotide Archive. Columns are: **study\_accession:** ID of the study in ENA.  
1907 **run\_accession:** ID of all the ENA runs included in this study (before quality control)

1908

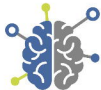

MetaBrain

15 datasets  
6,518 individuals  
8,727 RNA-seq samples

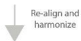

7 brain regions

Hypothalamus  
n = 252

Cortex  
n = 6,601

Hippocampus  
n = 206

Basal Ganglia  
n = 574

Cerebellum  
n = 723

Amygdala  
n = 86

Spinal cord  
n = 285

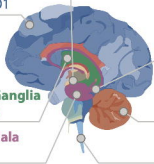

**Cis-eQTLs**

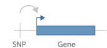

27,226 primary cis-eQTLs

**Secondary eQTLs**

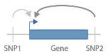

16,192 non-primary cis-eQTLs

**Trans-eQTLs**

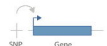

2,589 trans-eQTLs

**Interaction eQTLs**

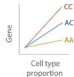

1,515 interaction eQTLs

**Mendelian randomization and colocalization**

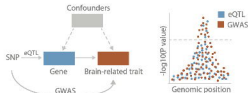

439 prioritized genes for 27 brain related traits

Gene prioritization

**Co-regulation network**

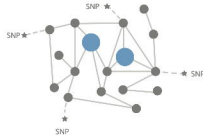

208 genes prioritized for 5 traits

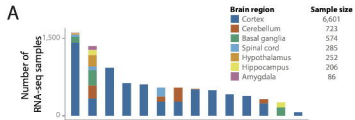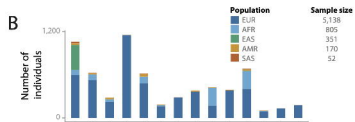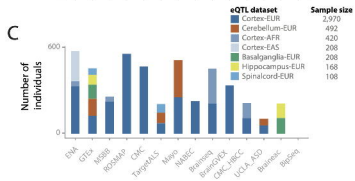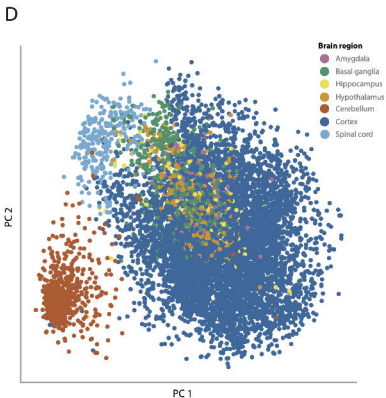

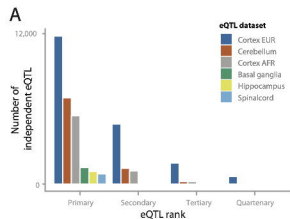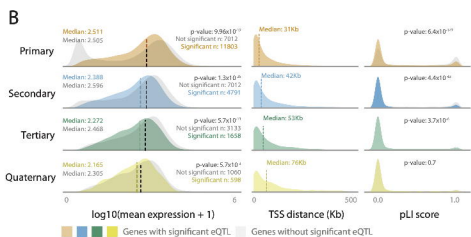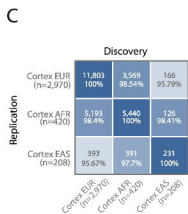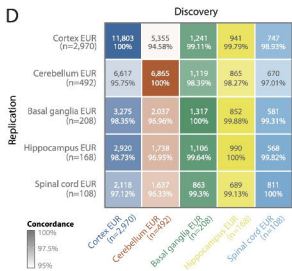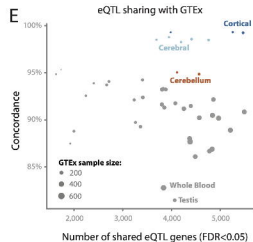

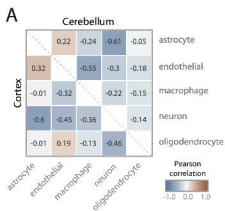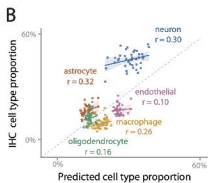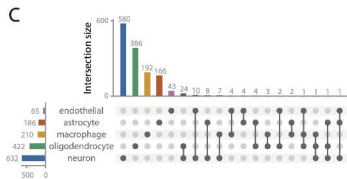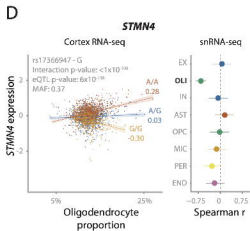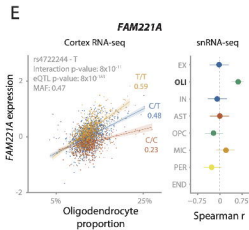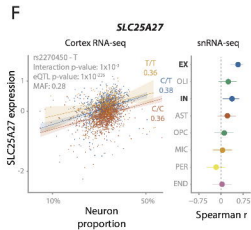



A

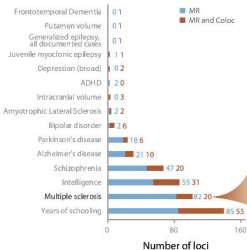

B

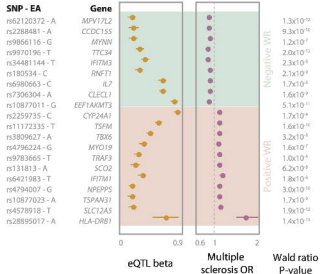

C

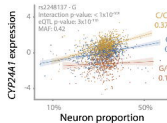

D

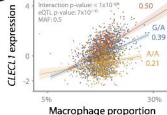

A

● Significant *trans*-eQTL after cross-mapping correction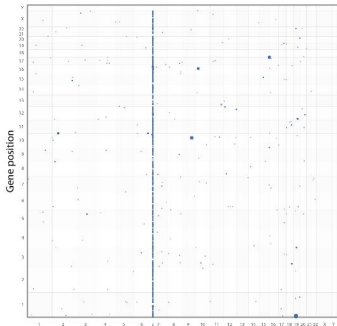

**2,252 *trans*-eQTLs  
in 7p21.3 locus**

B

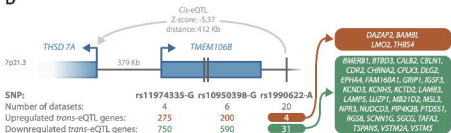

C

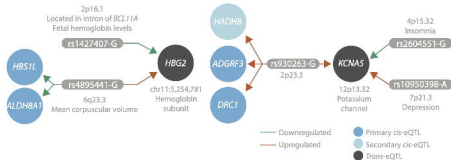

### A Genes, co-regulated with genes inside ALS loci:

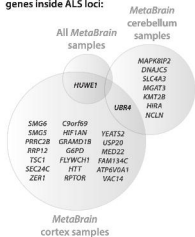

### B

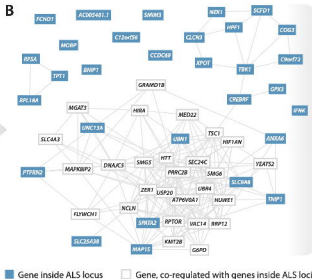

### C

#### Associated phenotypes:

| p-value                | HPD enrichments                          |
|------------------------|------------------------------------------|
| $6.69 \times 10^{-16}$ | Cerebral visual impairment               |
| $1.24 \times 10^{-12}$ | Gait disturbance                         |
| $1.33 \times 10^{-12}$ | Cerebral cortical atrophy                |
| $2.11 \times 10^{-12}$ | Cerebellar atrophy                       |
| $2.94 \times 10^{-12}$ | Abnormality of the cerebral white matter |

### D Genes, co-regulated with genes inside MS loci:

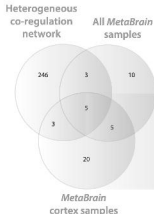

### E

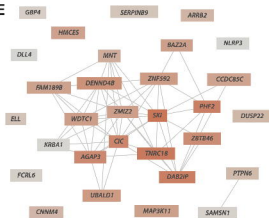

### F

#### Associated pathways:

| p-value               | KEGG enrichments                  |
|-----------------------|-----------------------------------|
| $4.8 \times 10^{-14}$ | Acute myeloid leukemia            |
| $8.3 \times 10^{-14}$ | T cell receptor signaling pathway |
| $1.6 \times 10^{-14}$ | Chemokine signaling pathway       |
| $1.4 \times 10^{-14}$ | Neurotrophin signaling pathway    |
| $5.7 \times 10^{-14}$ | Endocytosis                       |
