# Supplementary material for: Brain expression quantitative trait locus and network analysis reveals downstream effects and putative drivers for brain-related diseases
Source: bioRxiv or medRxiv preprint supplement (doi:10.1101/2021.03.01.433439), 2021-03-05

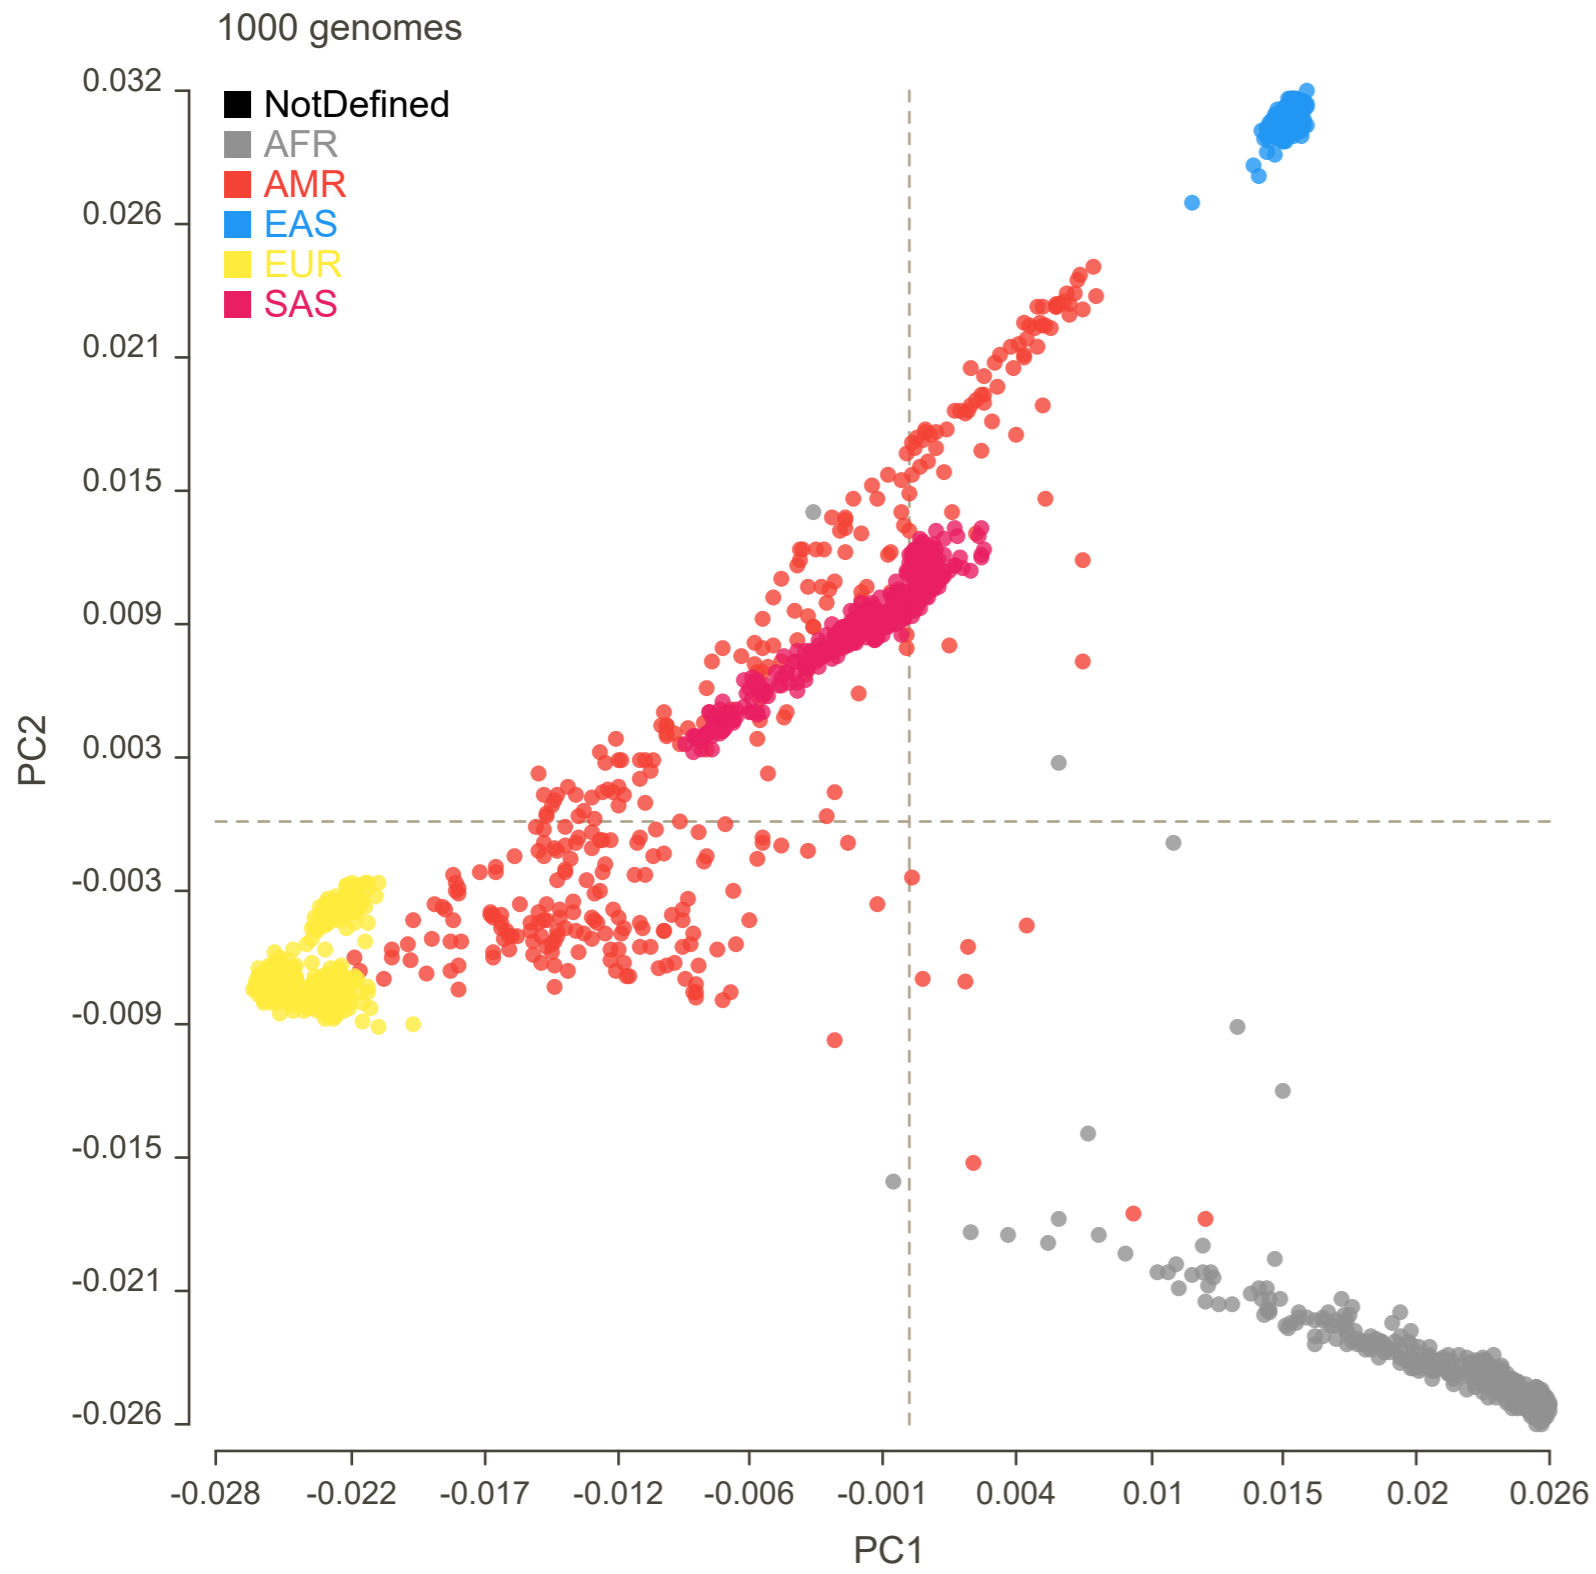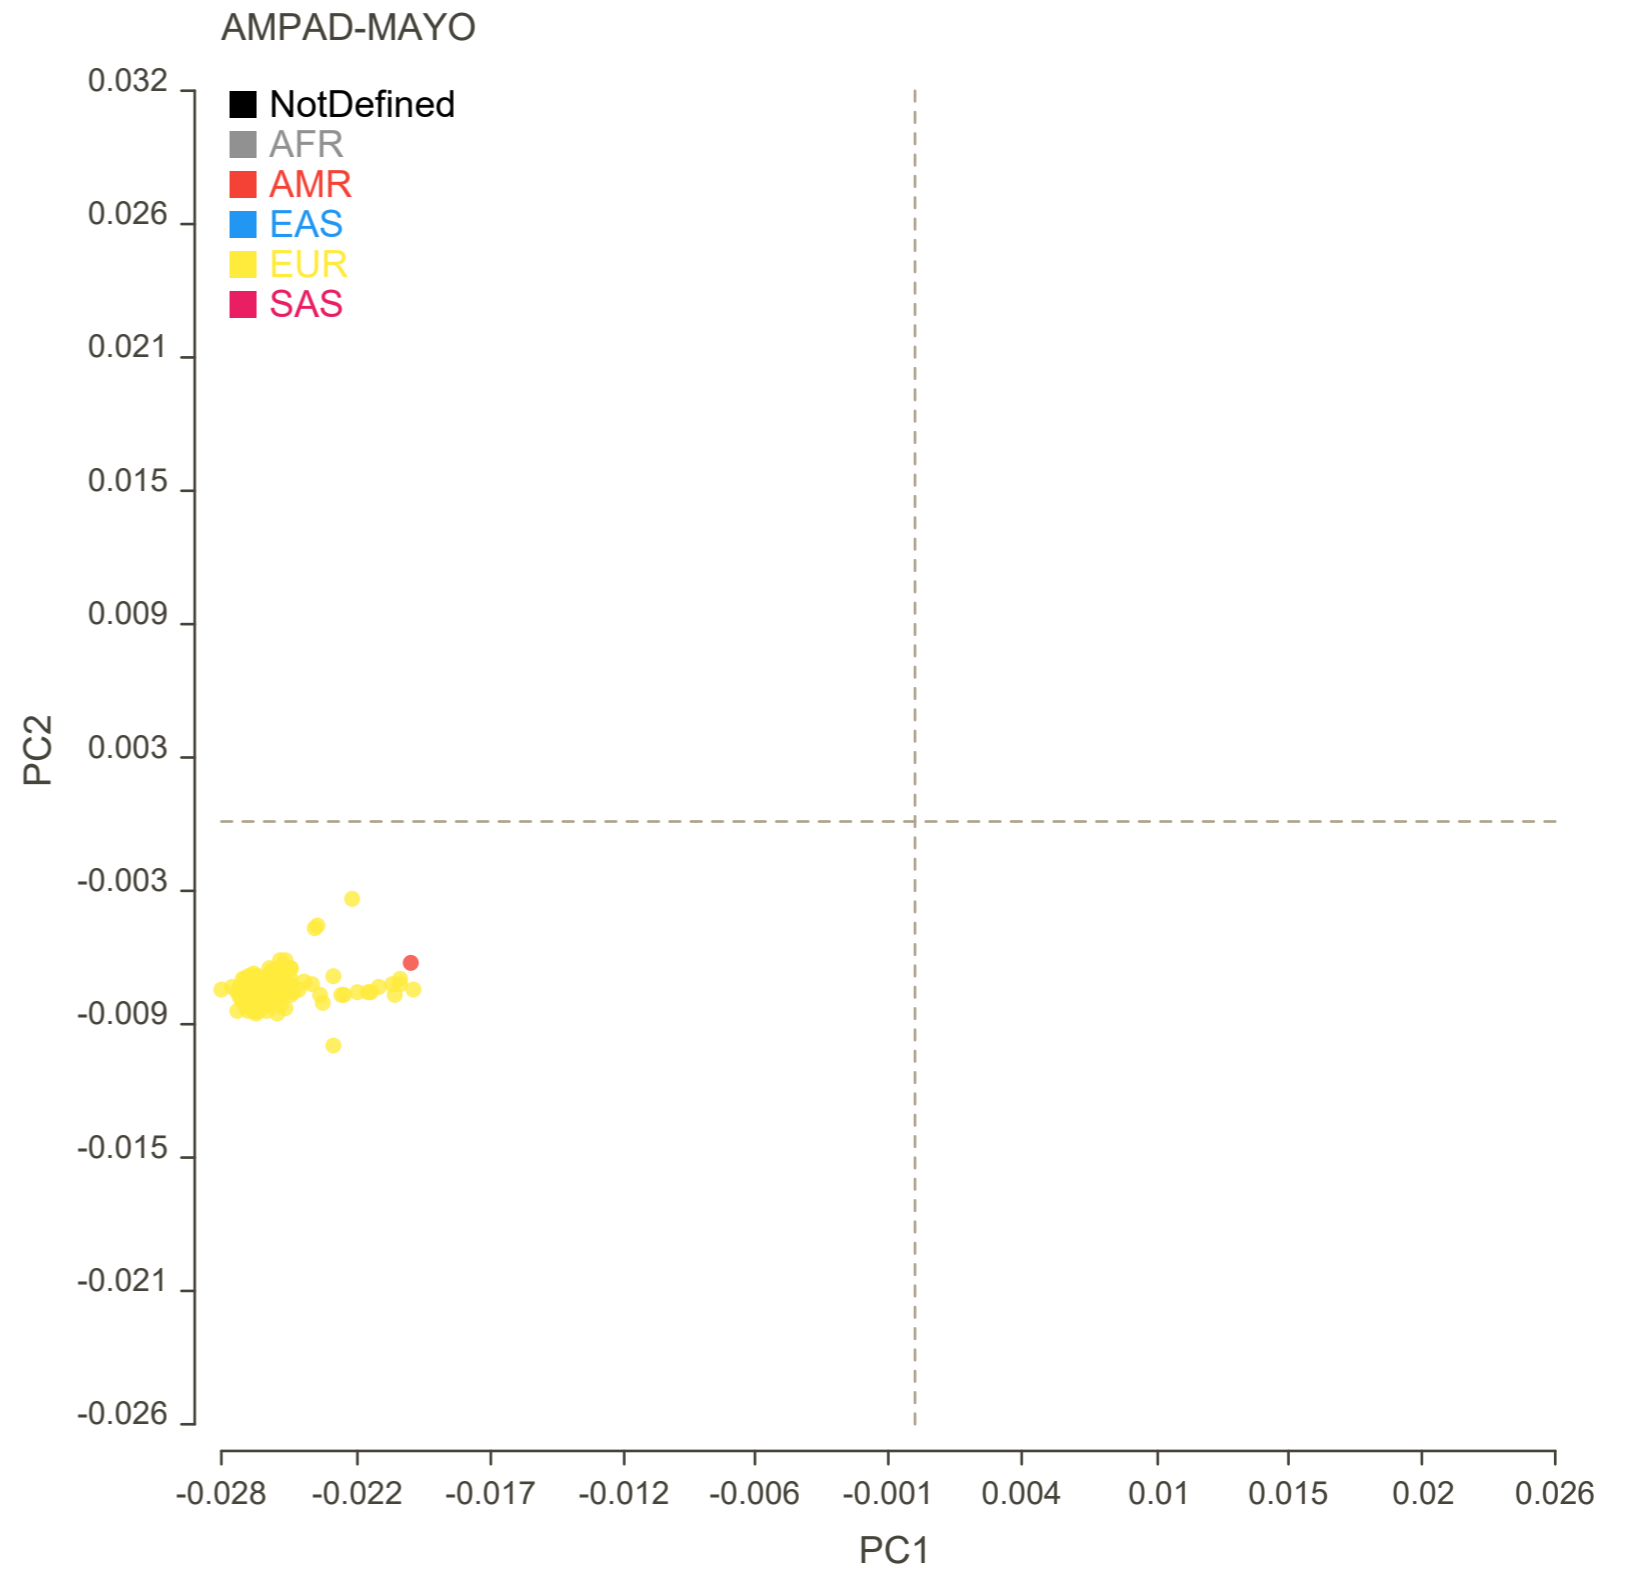

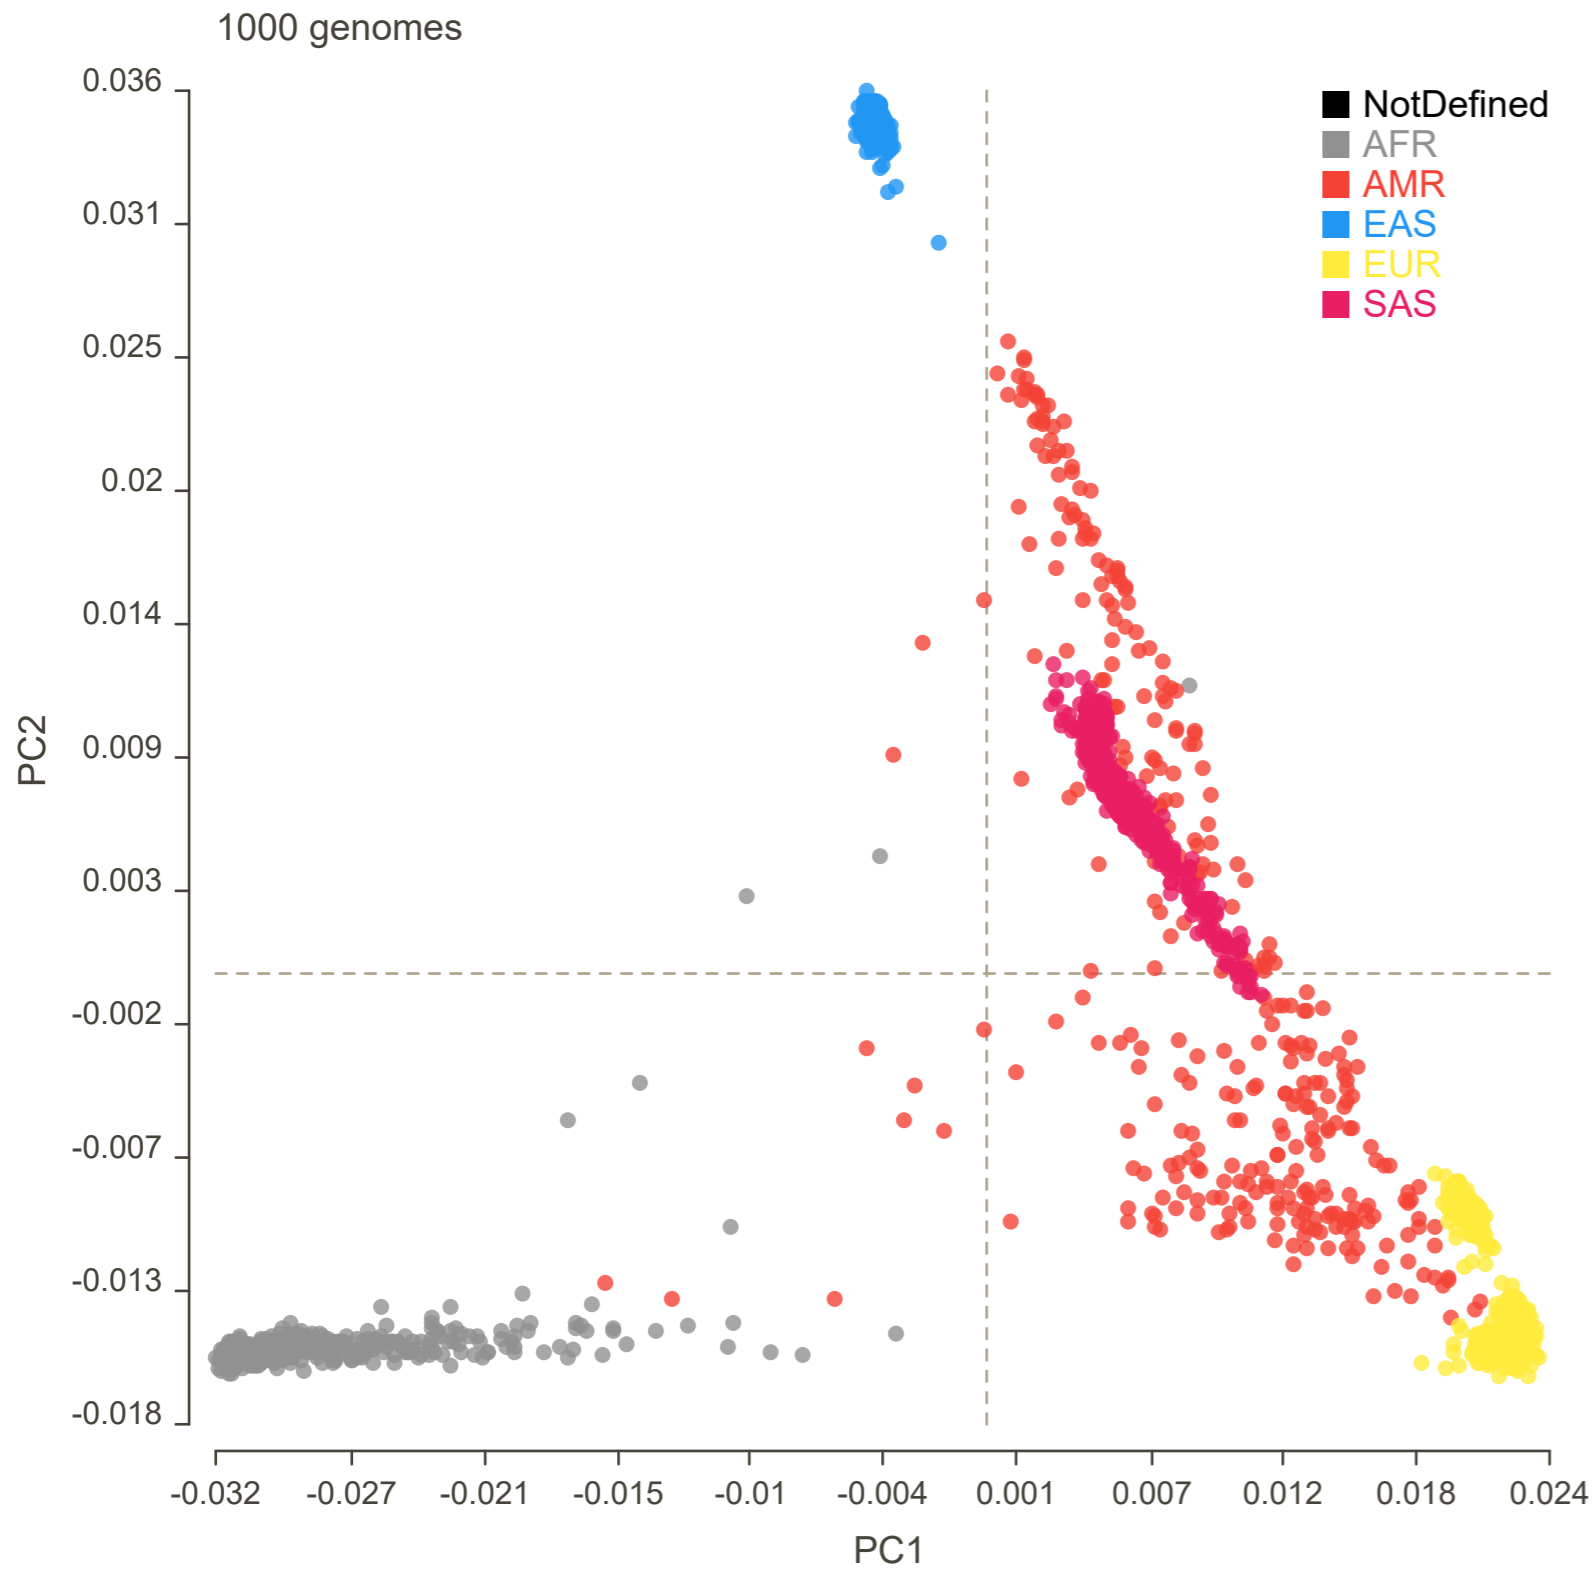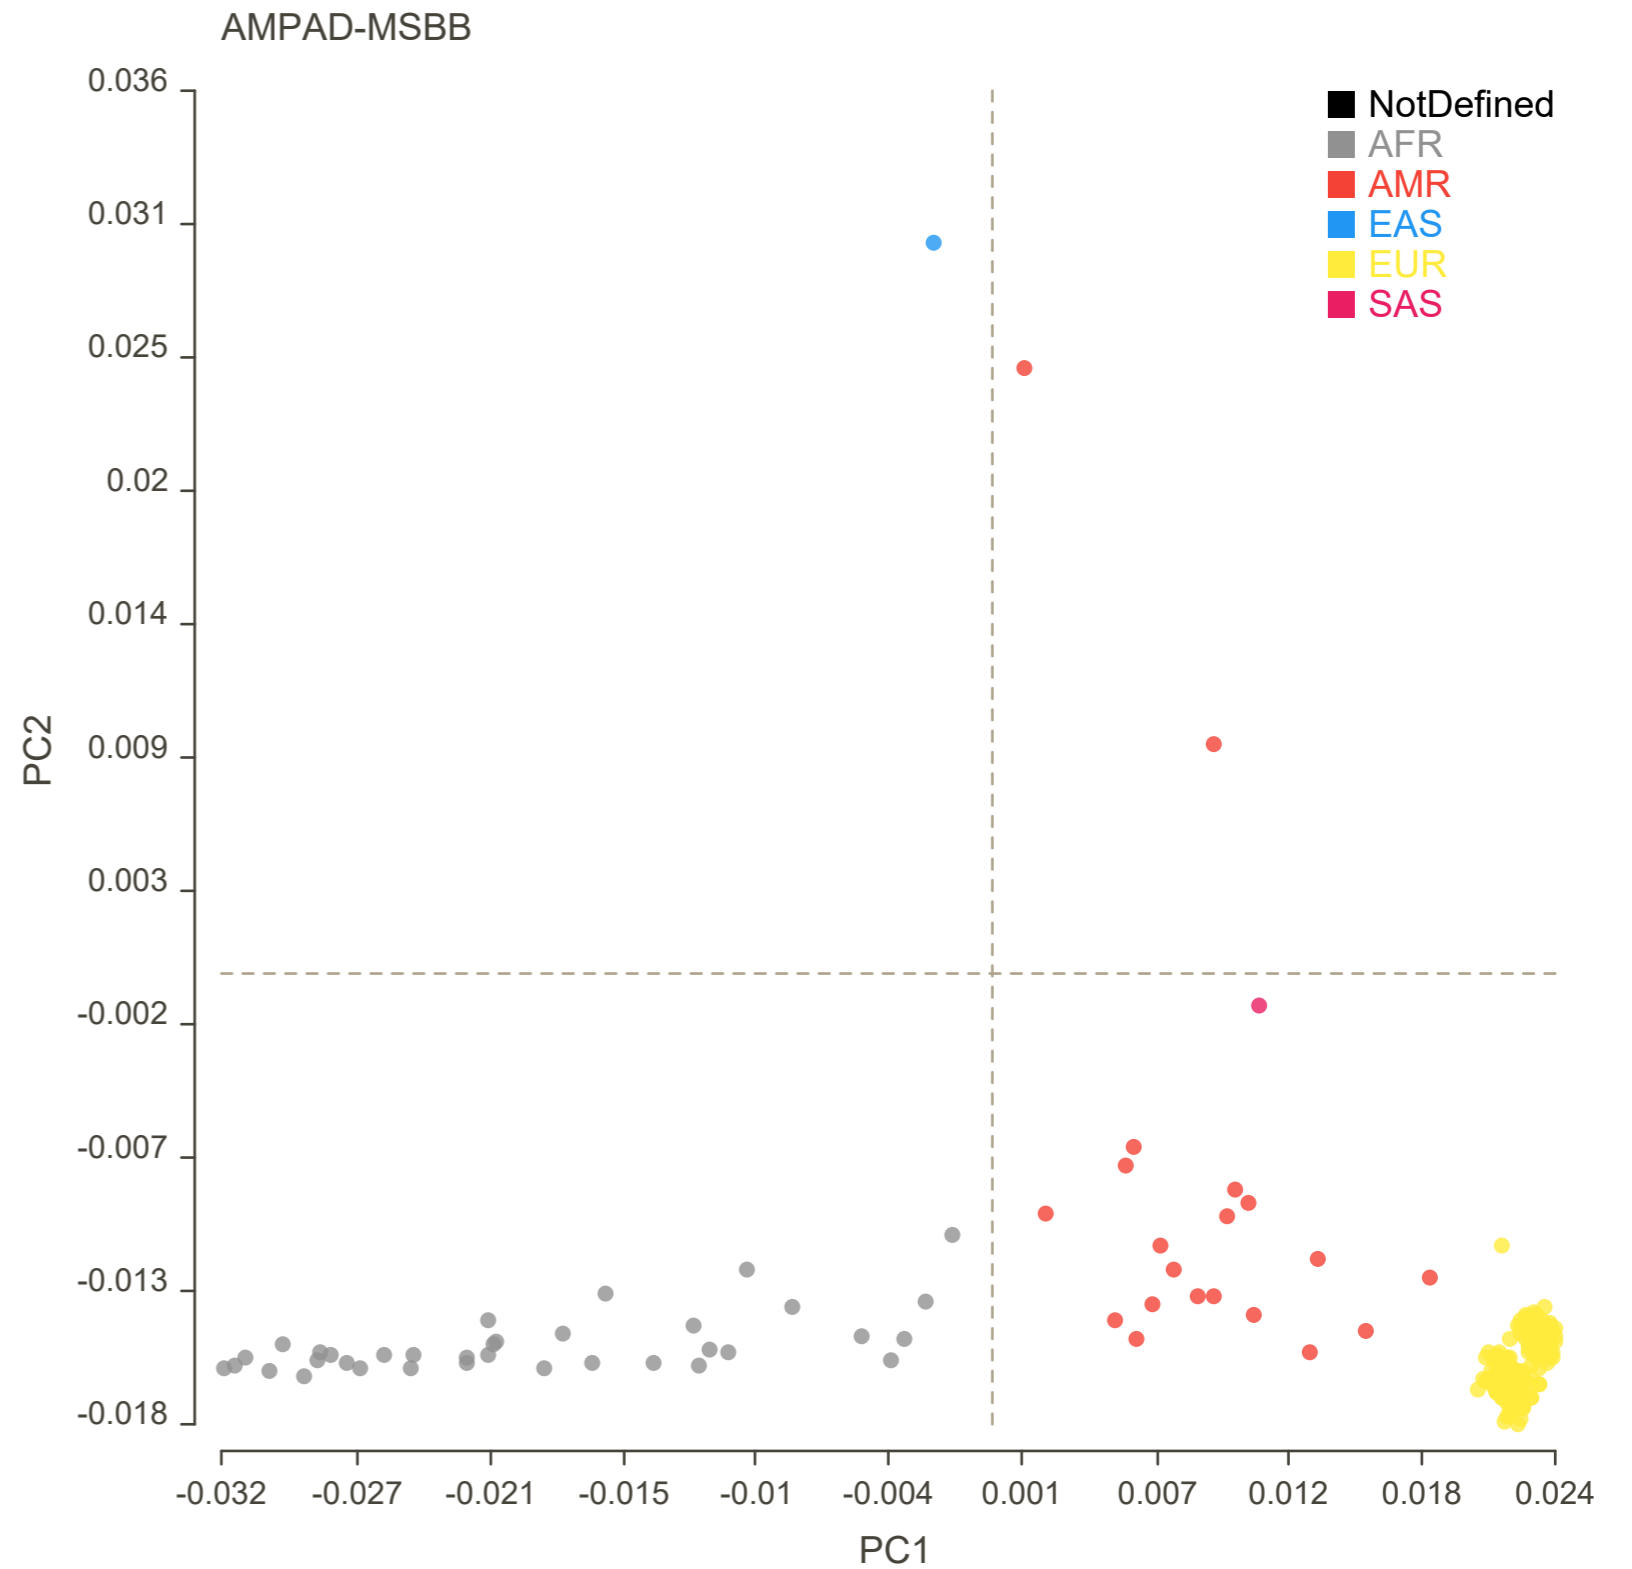

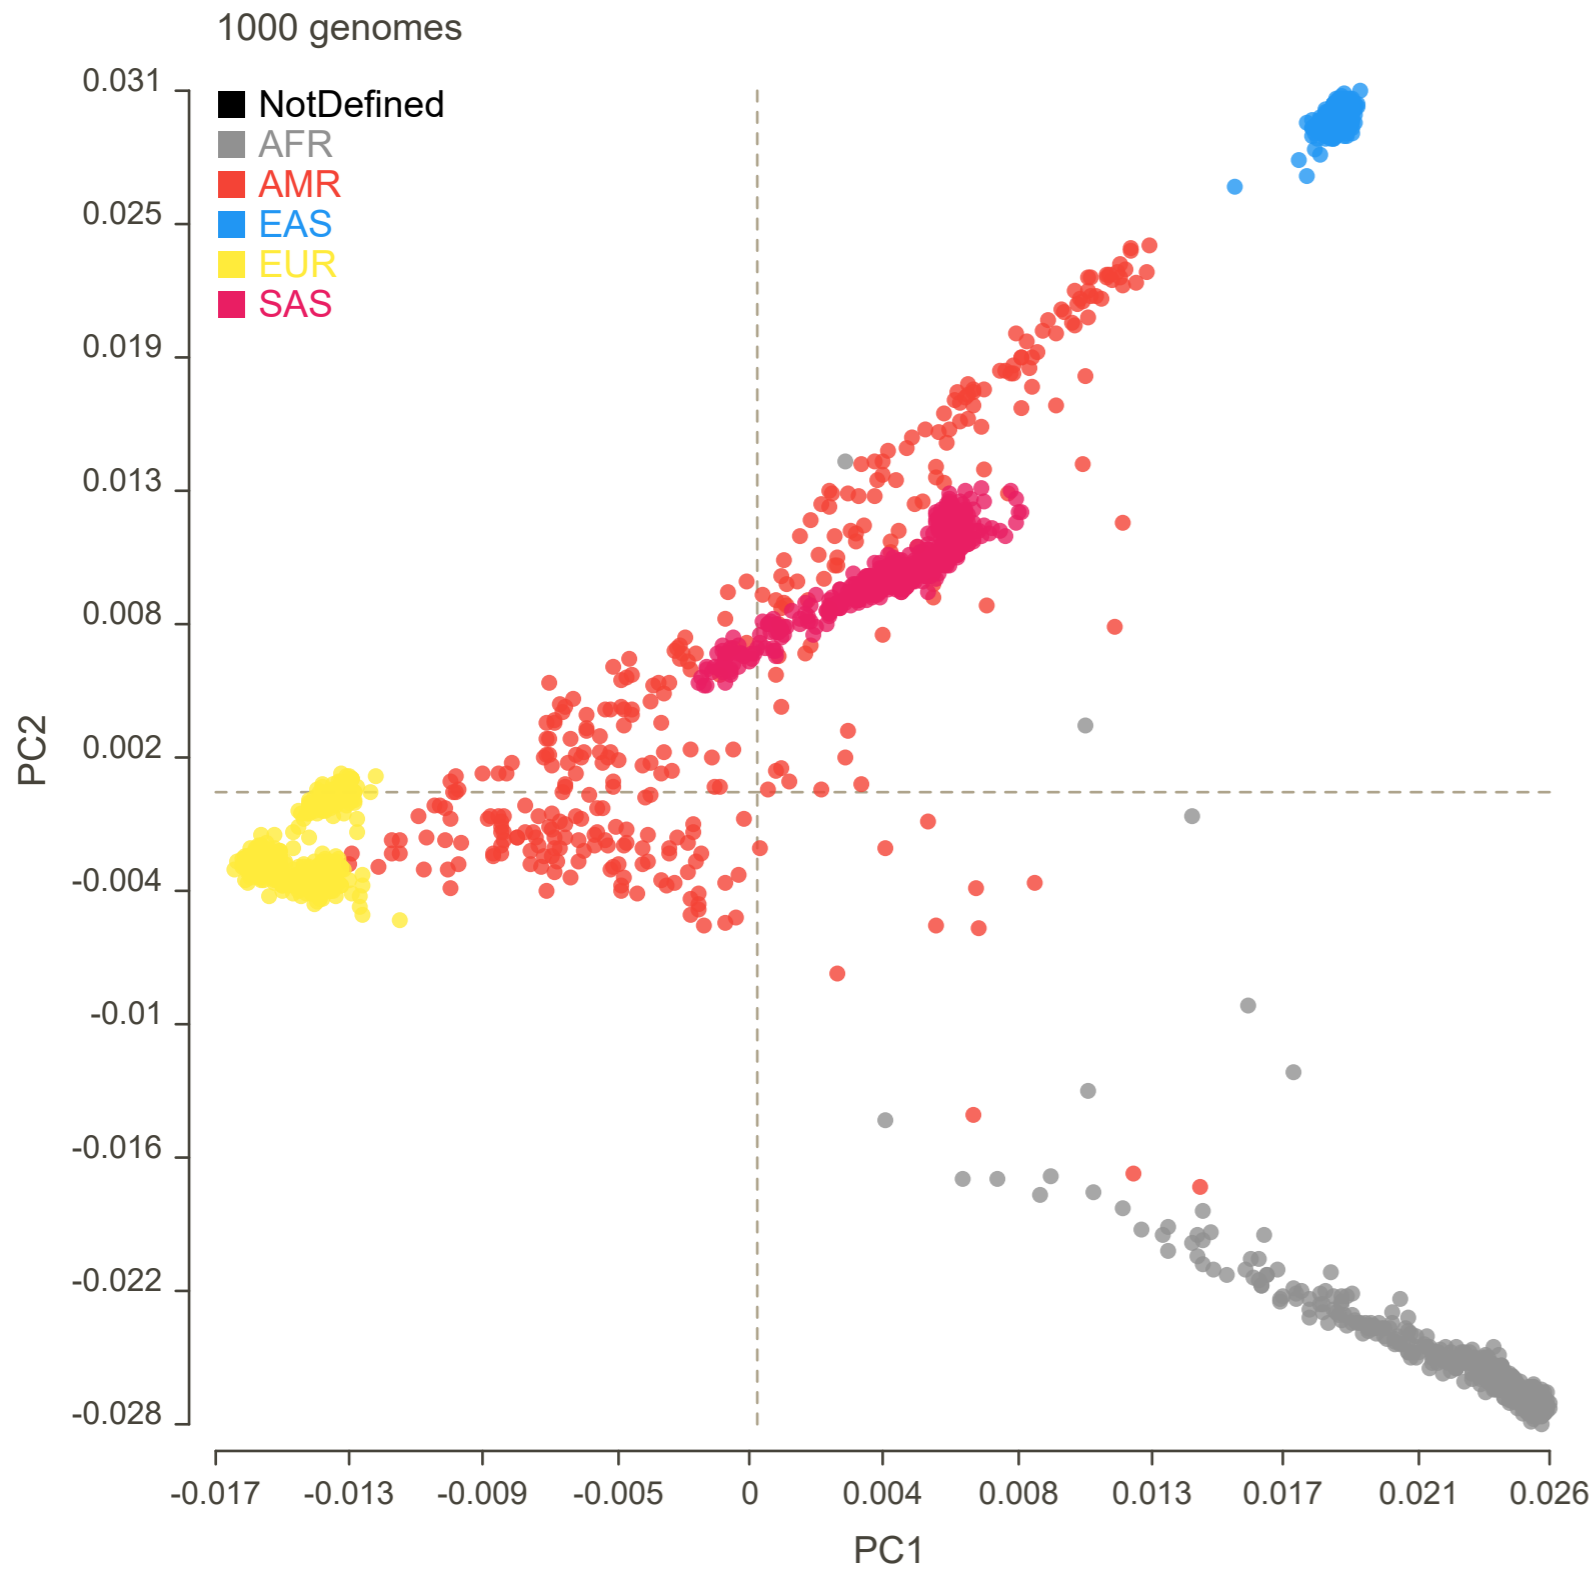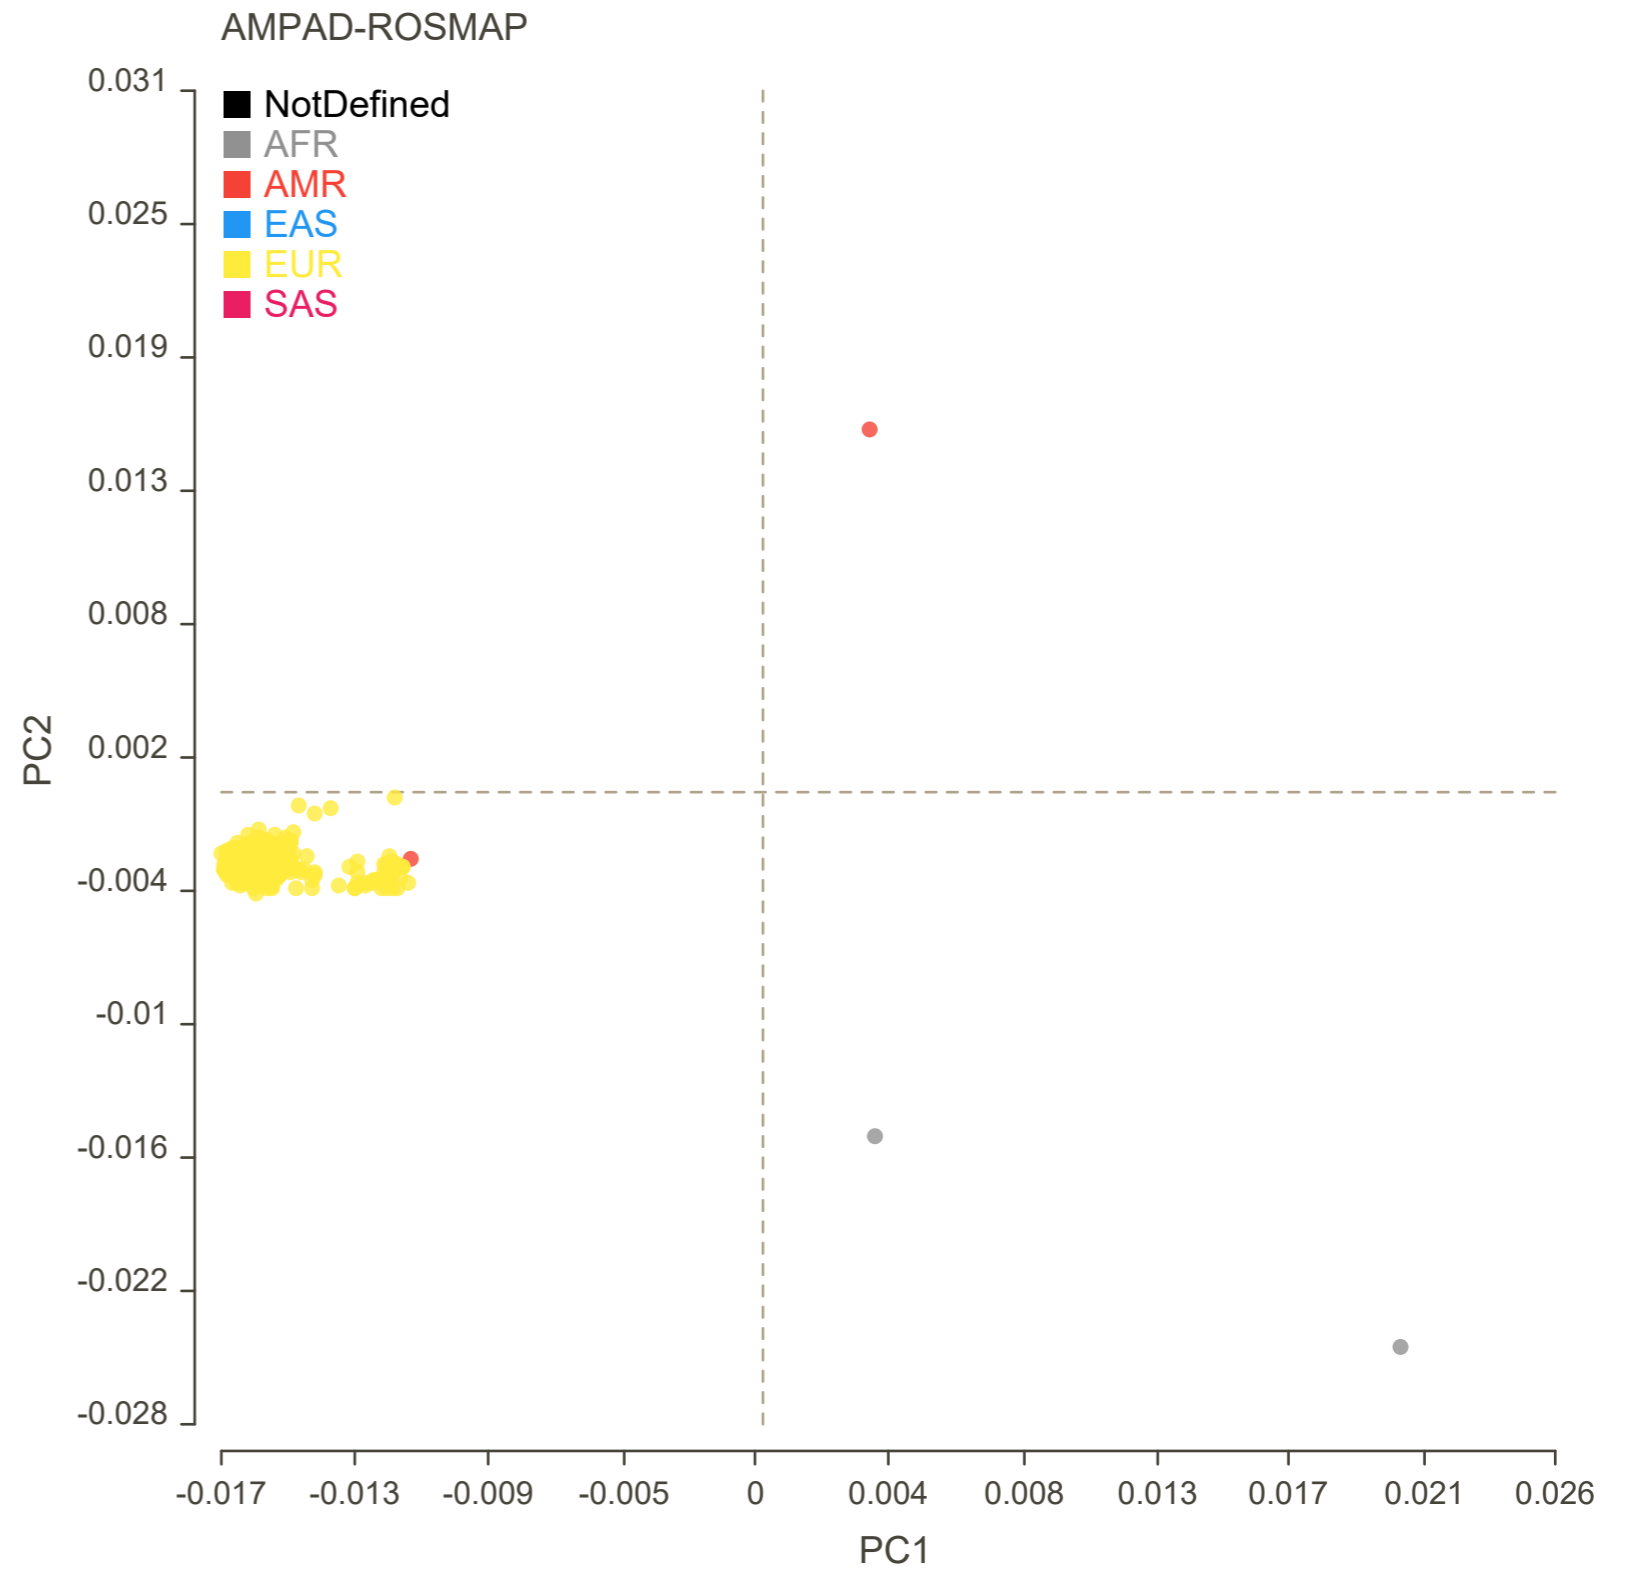

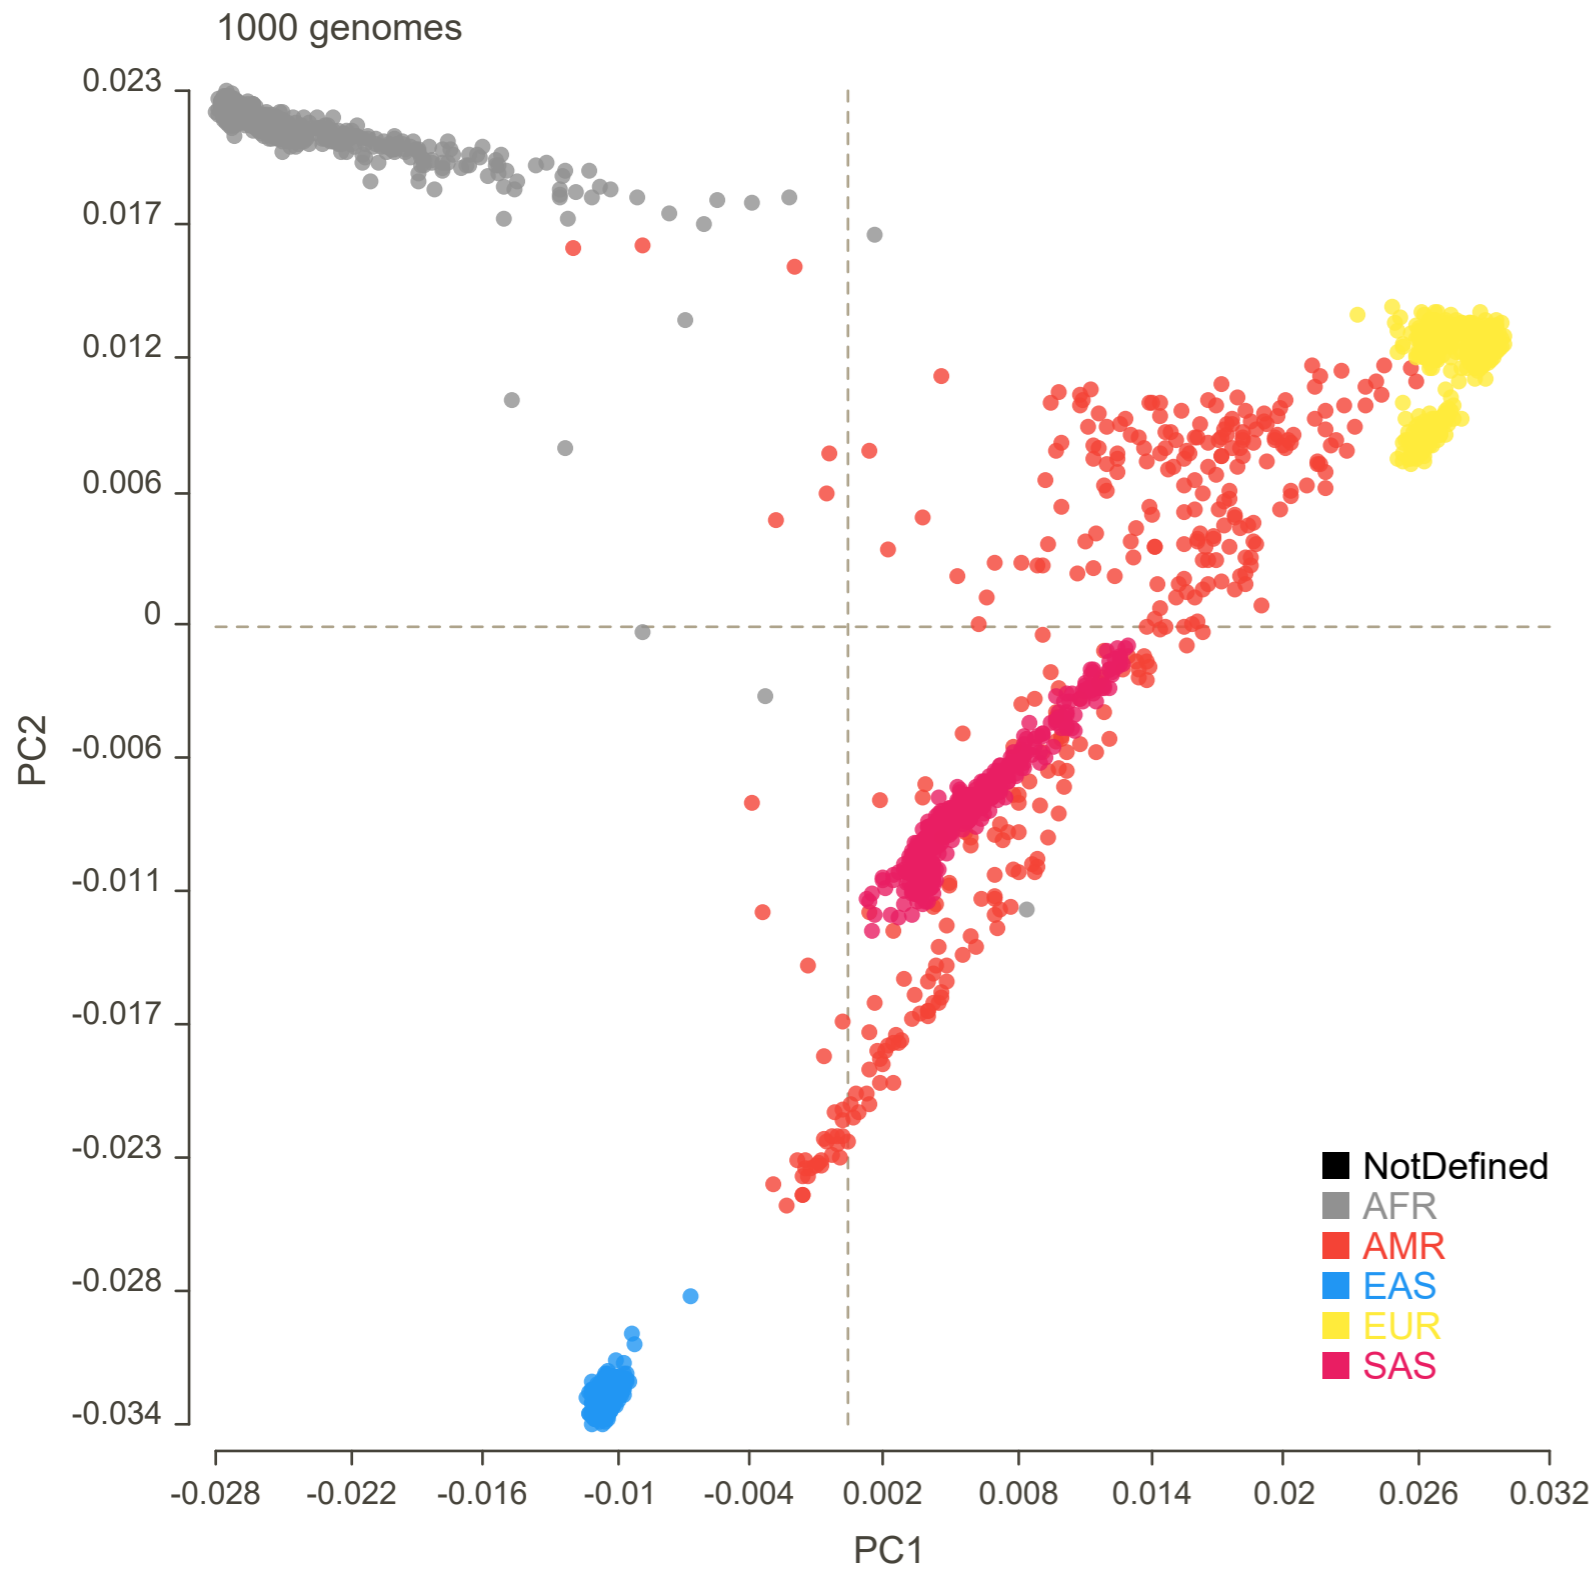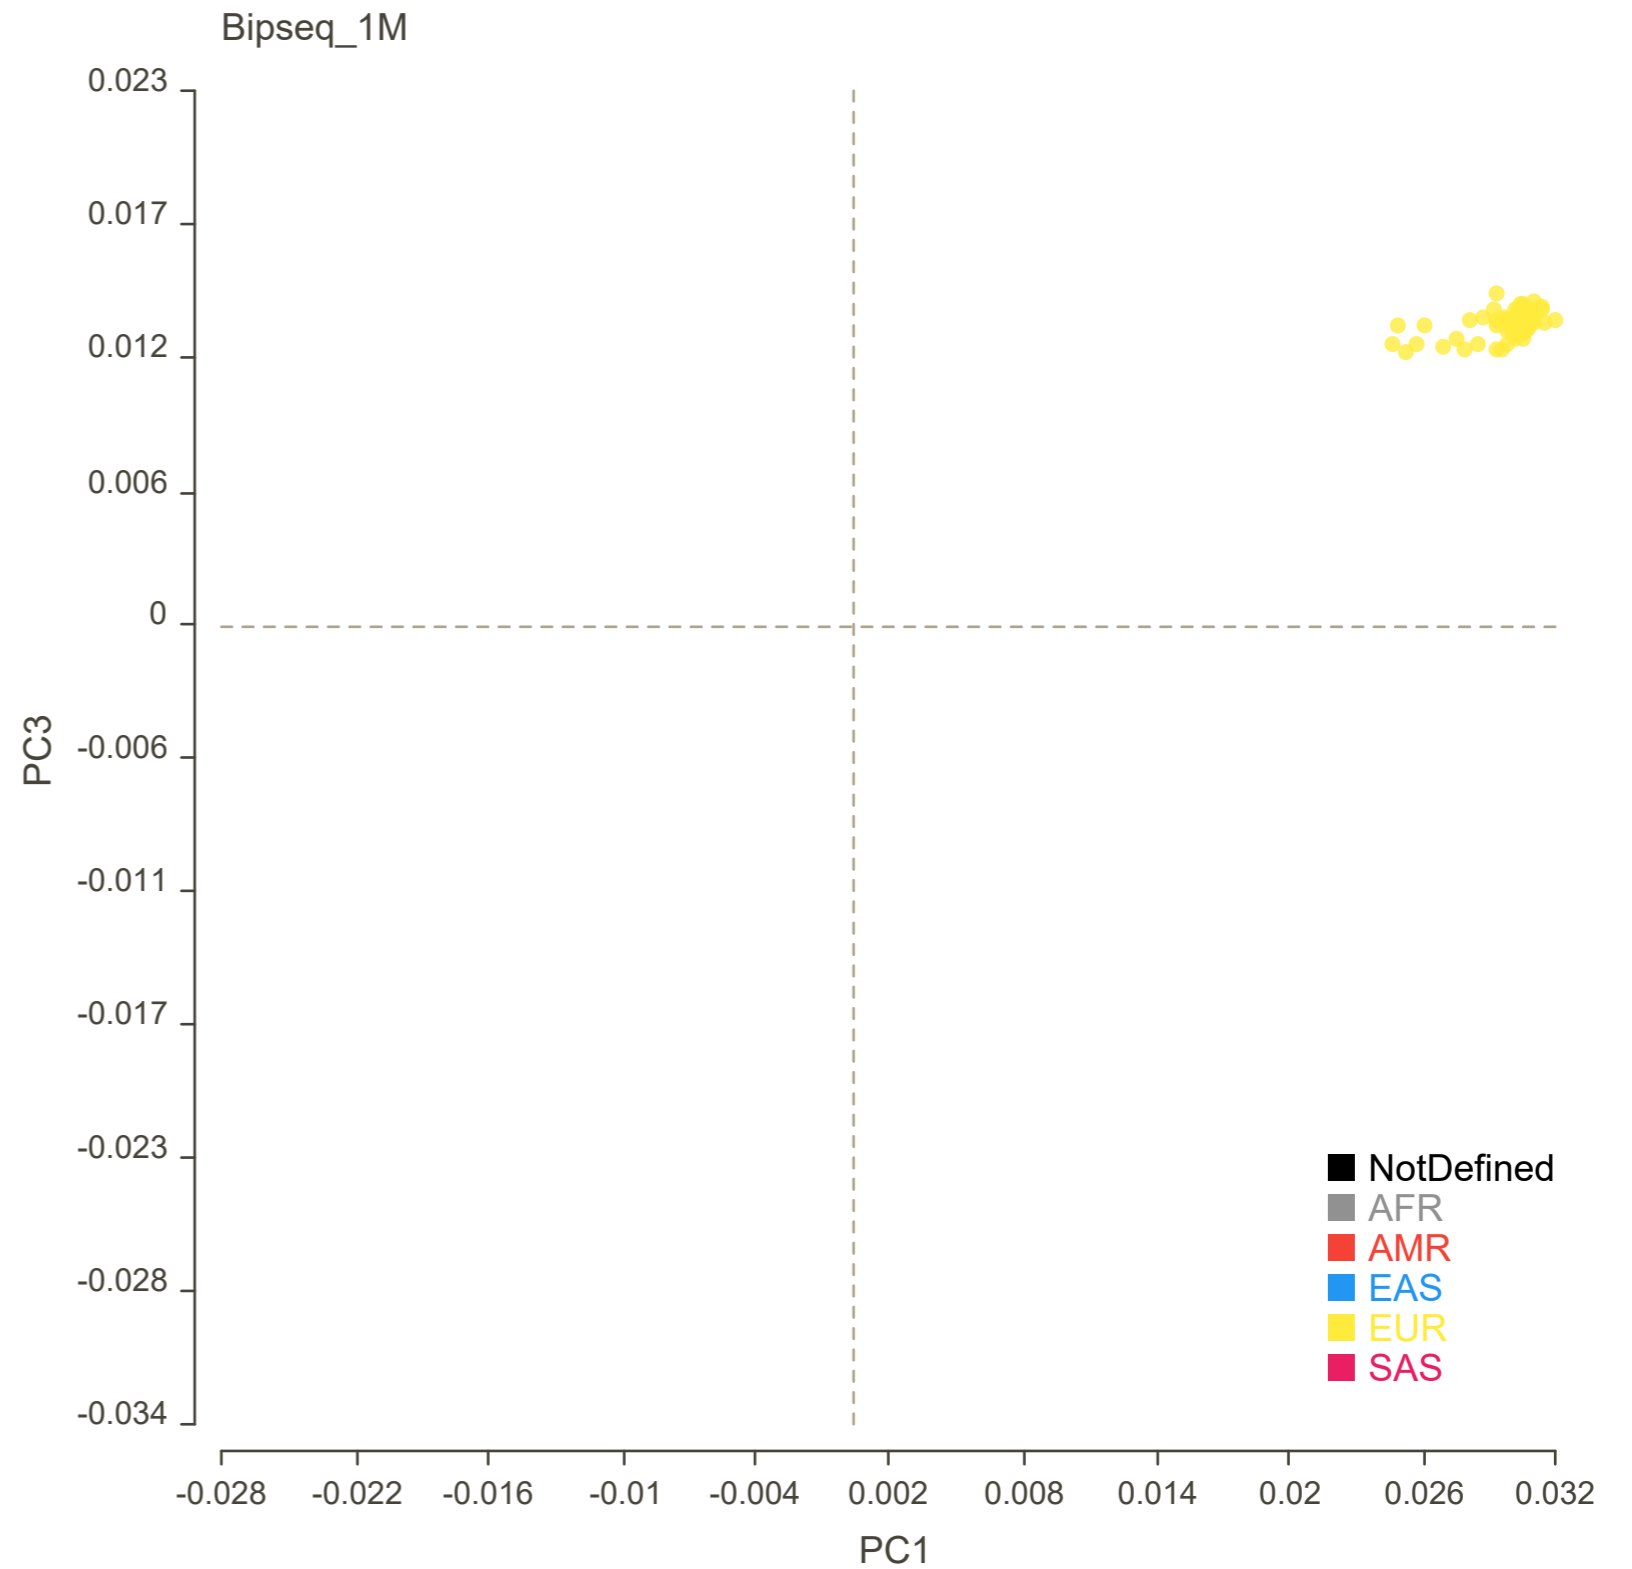

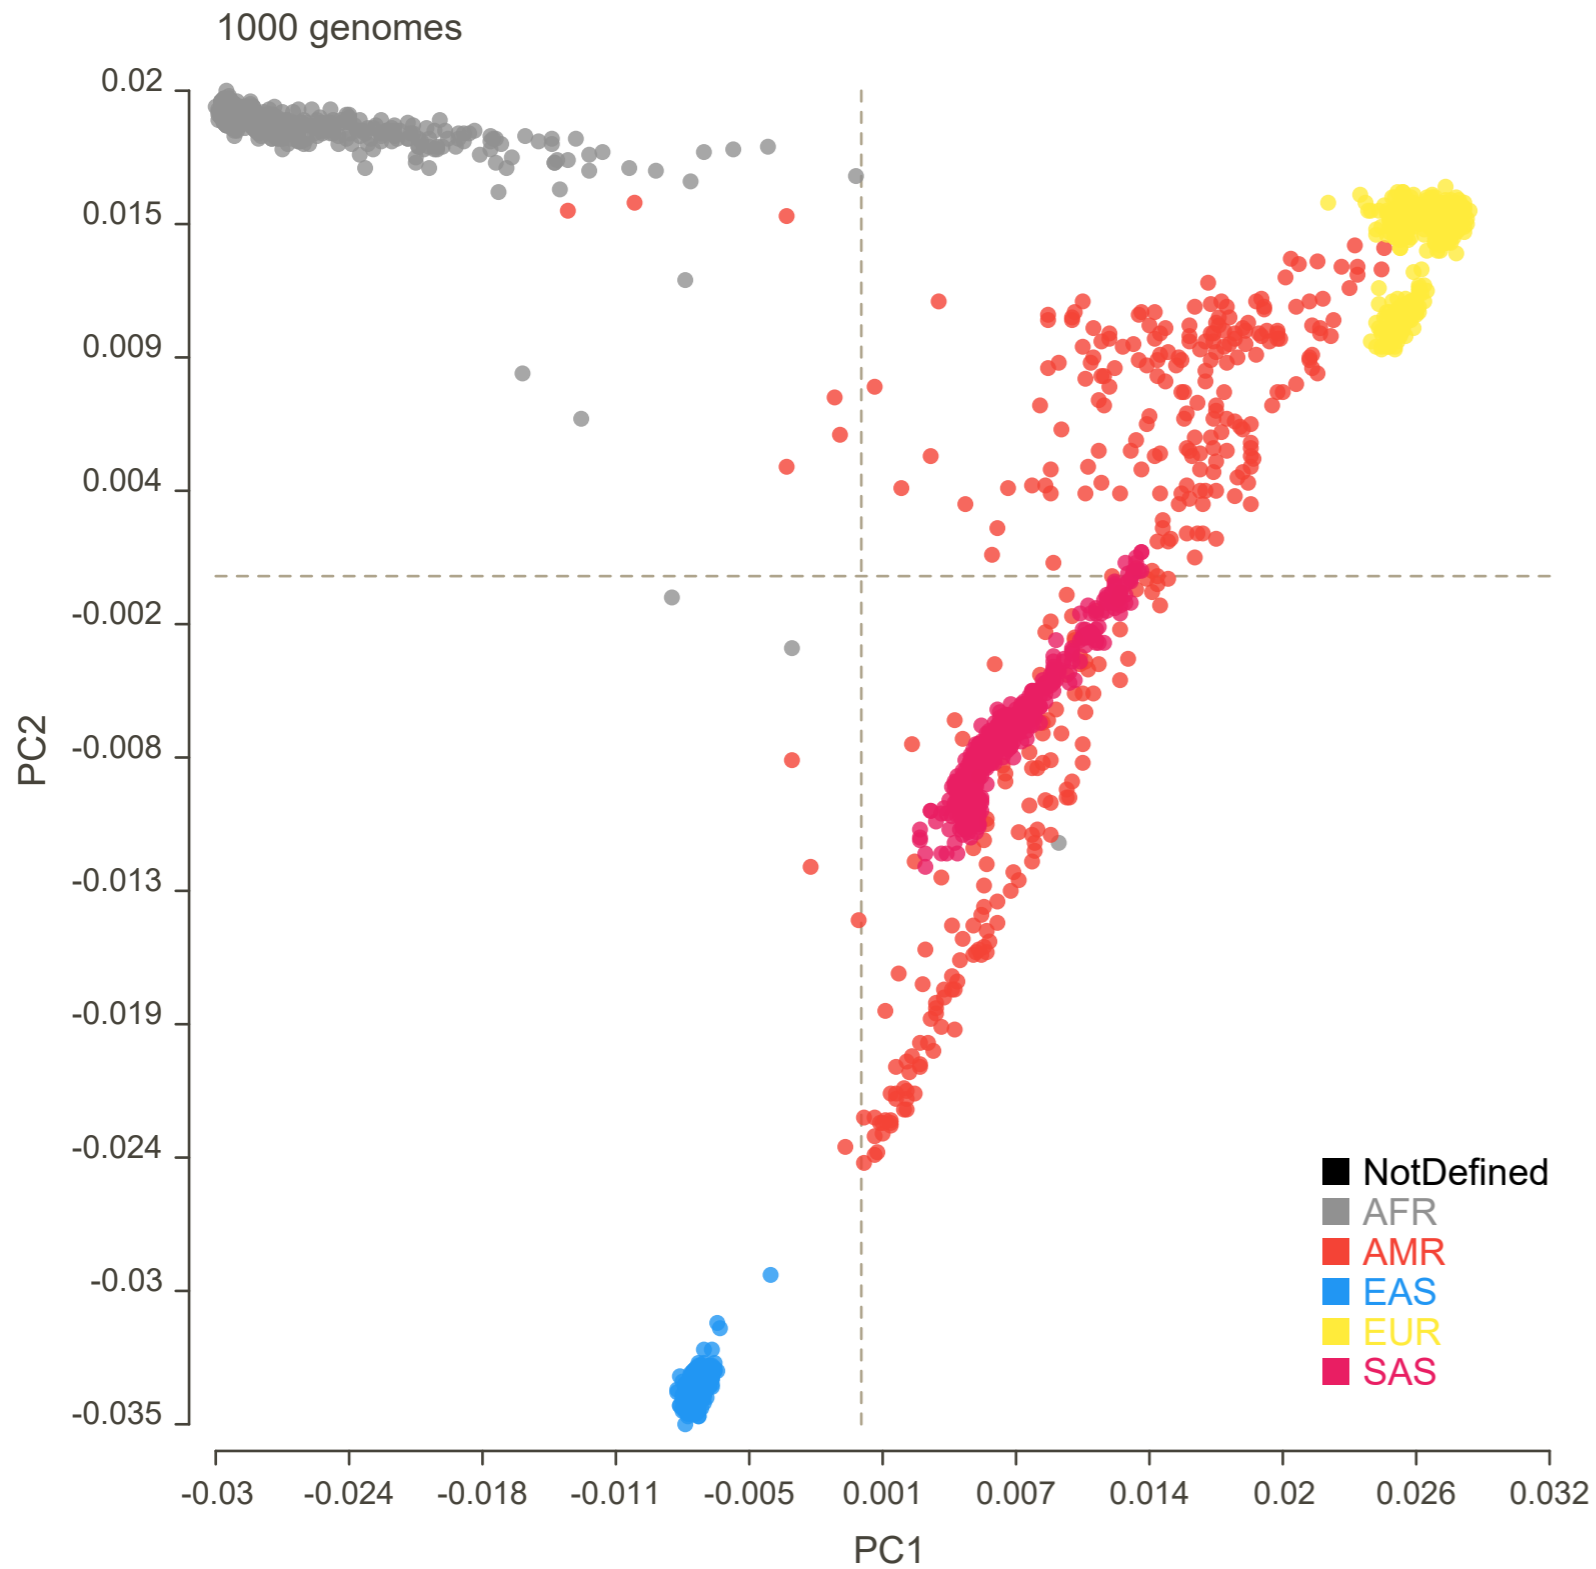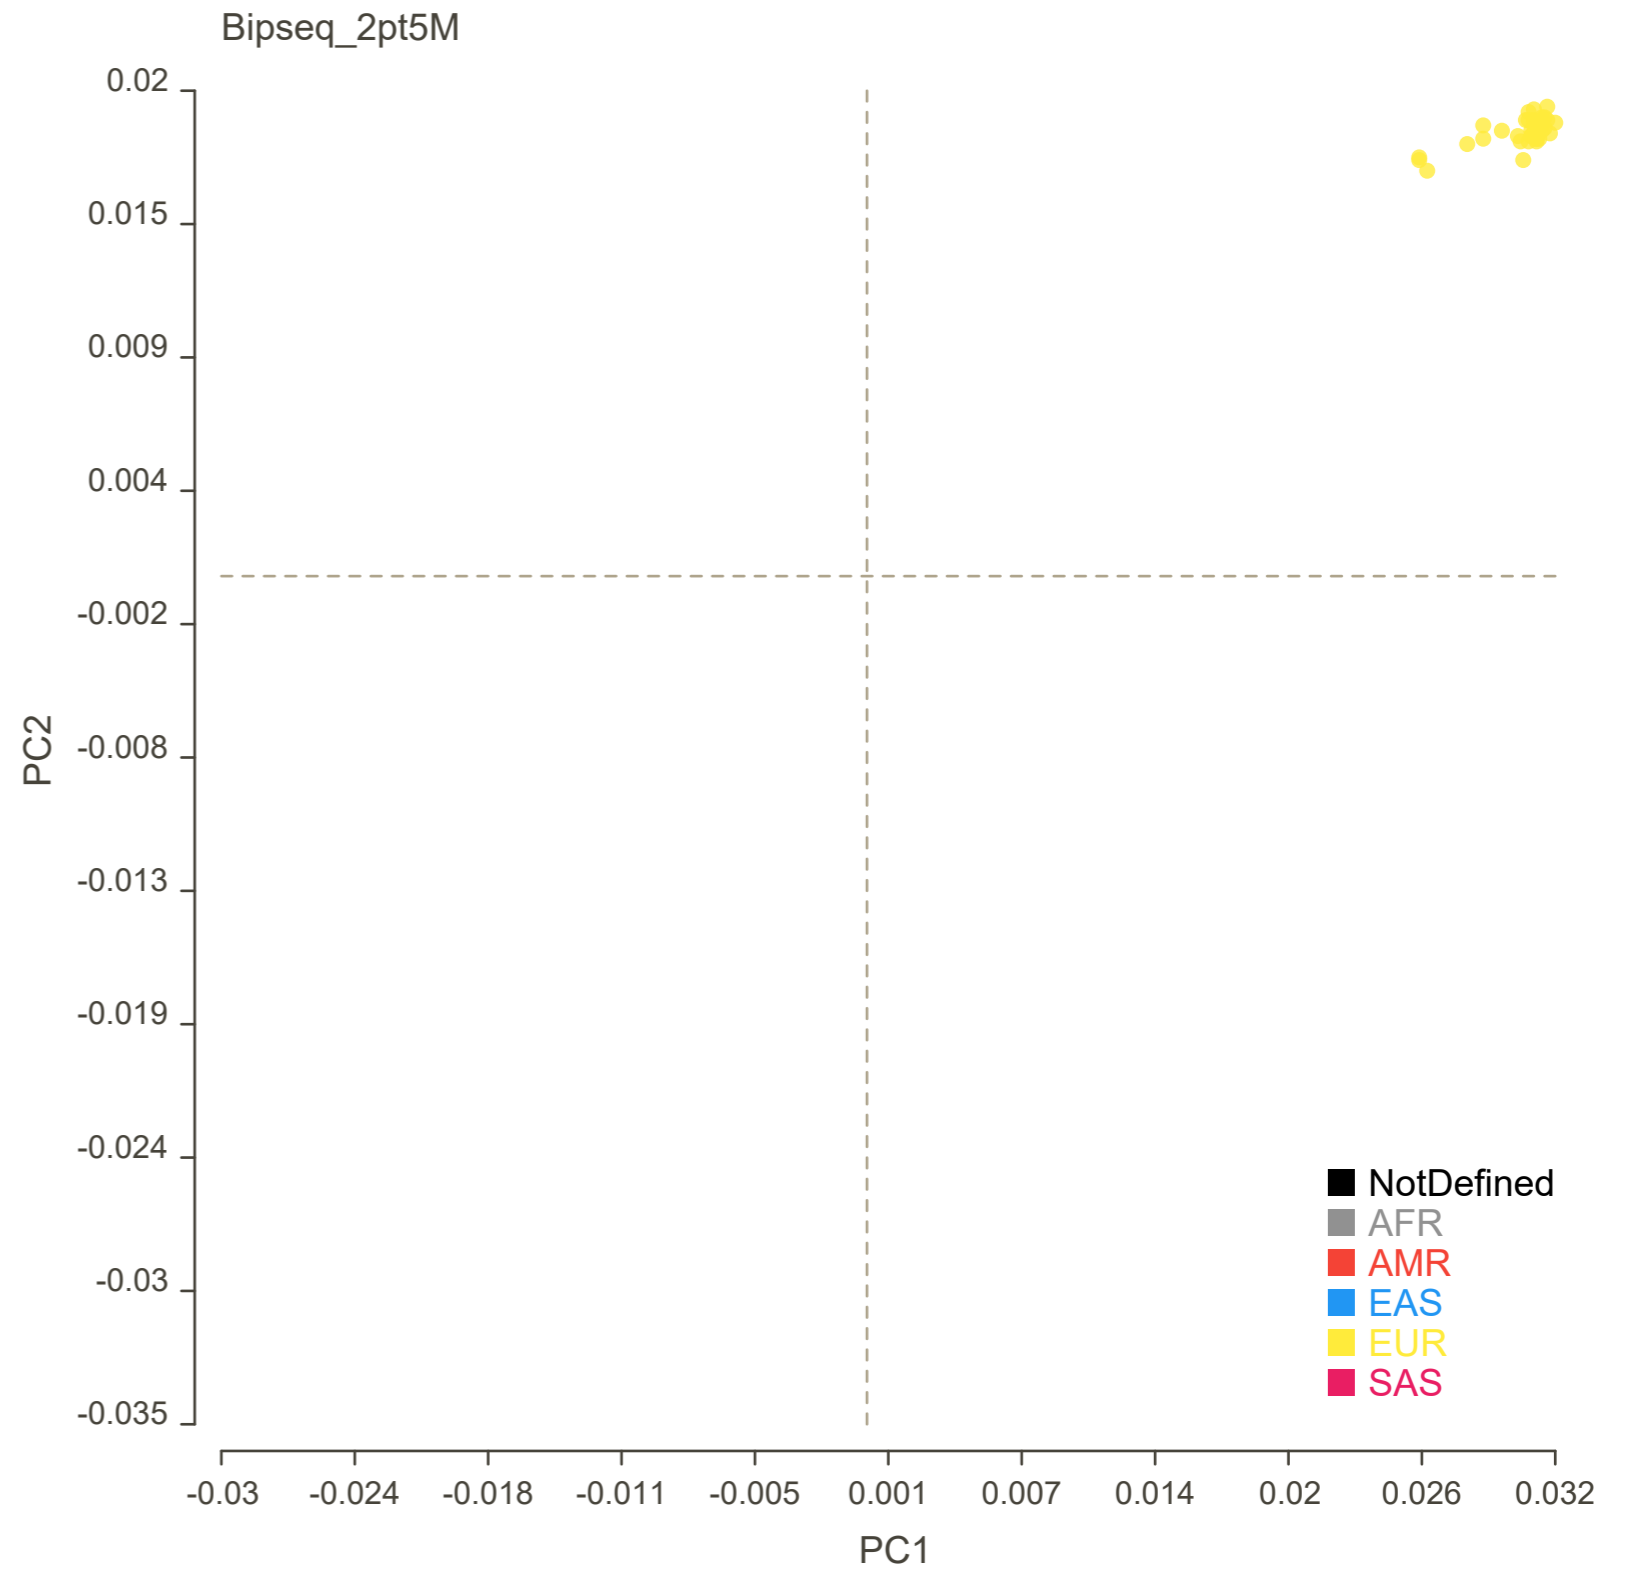

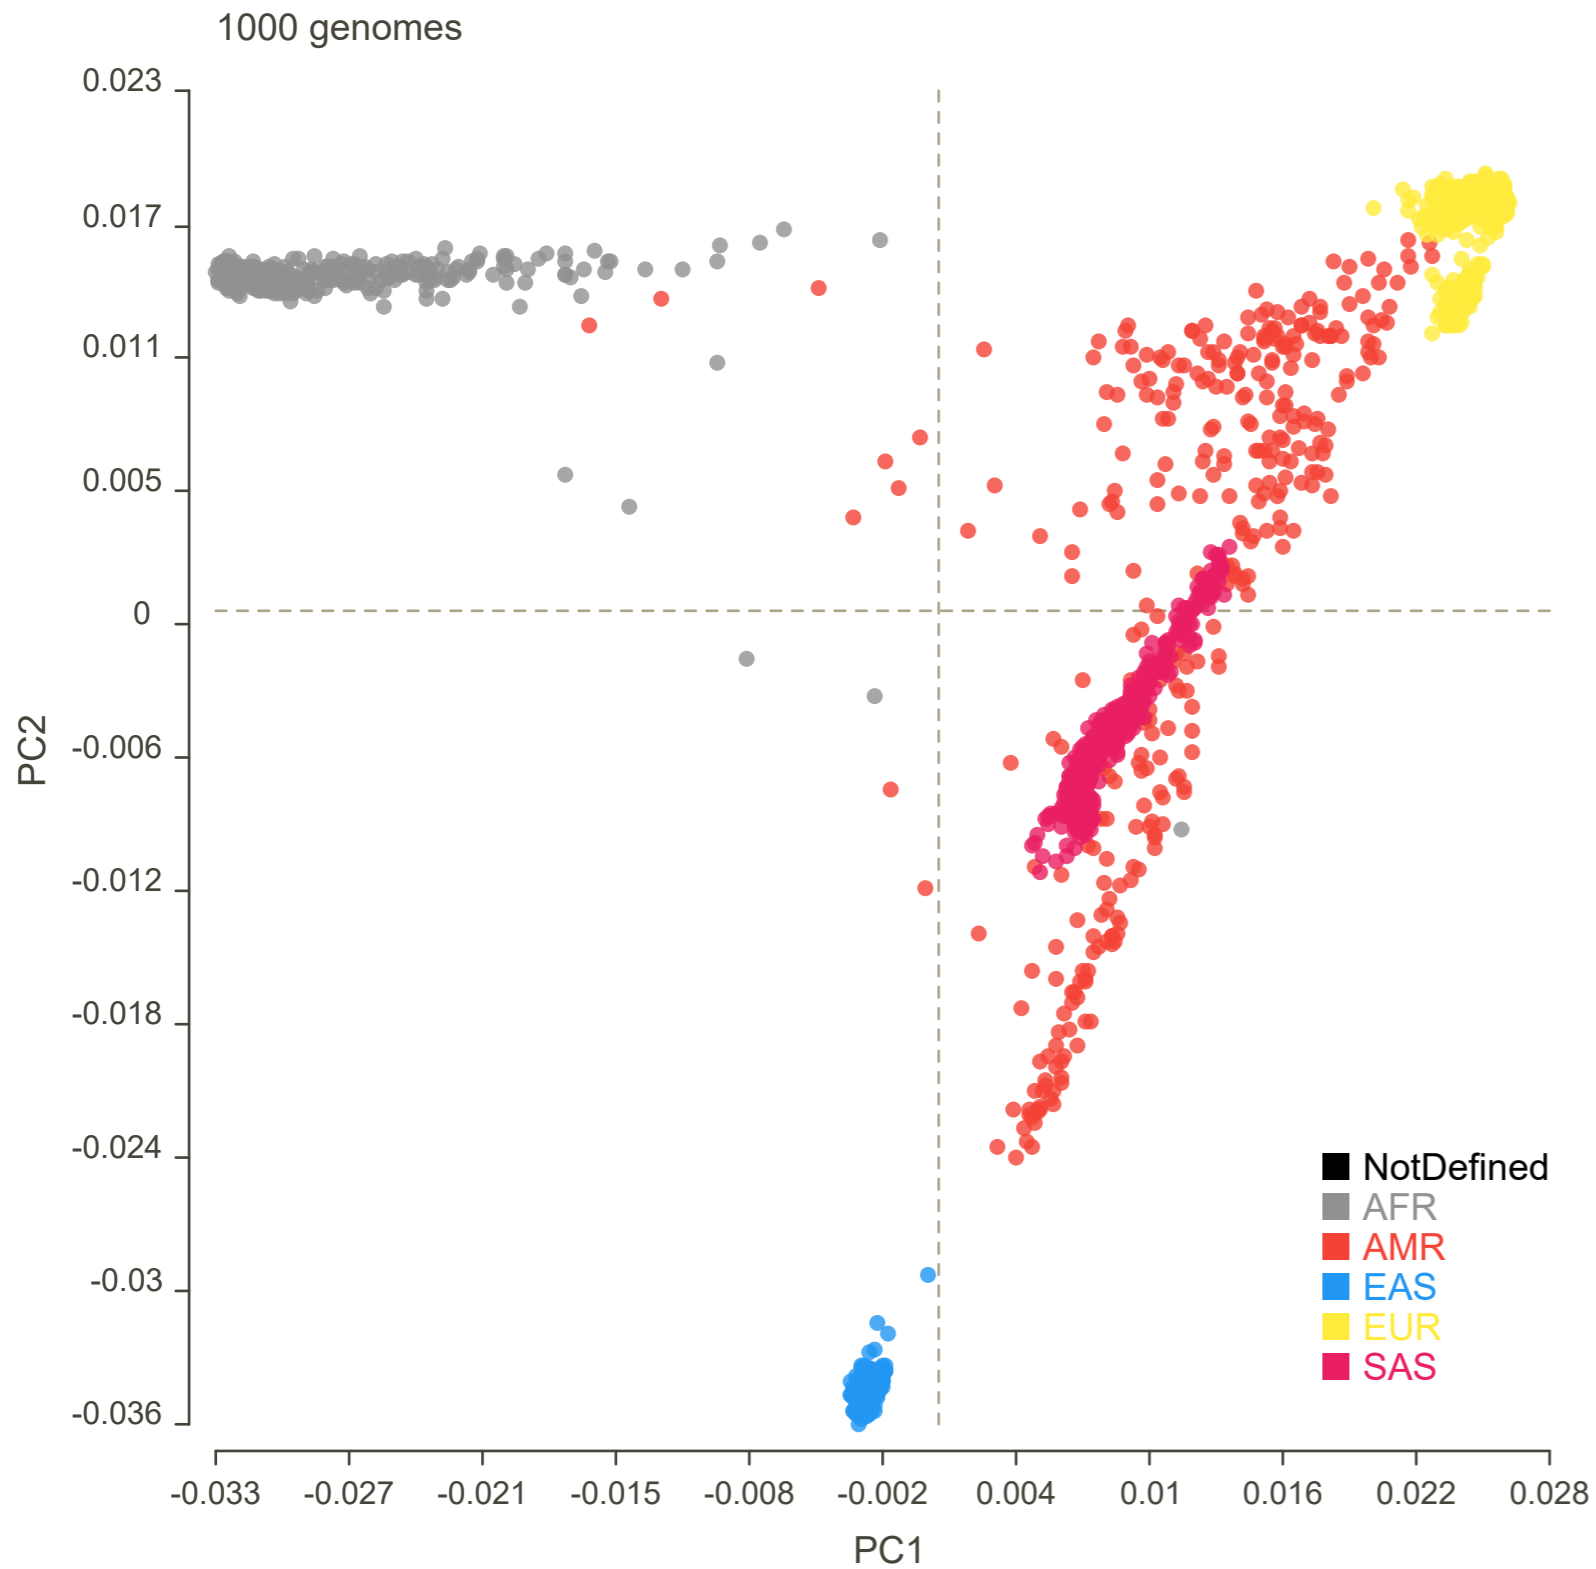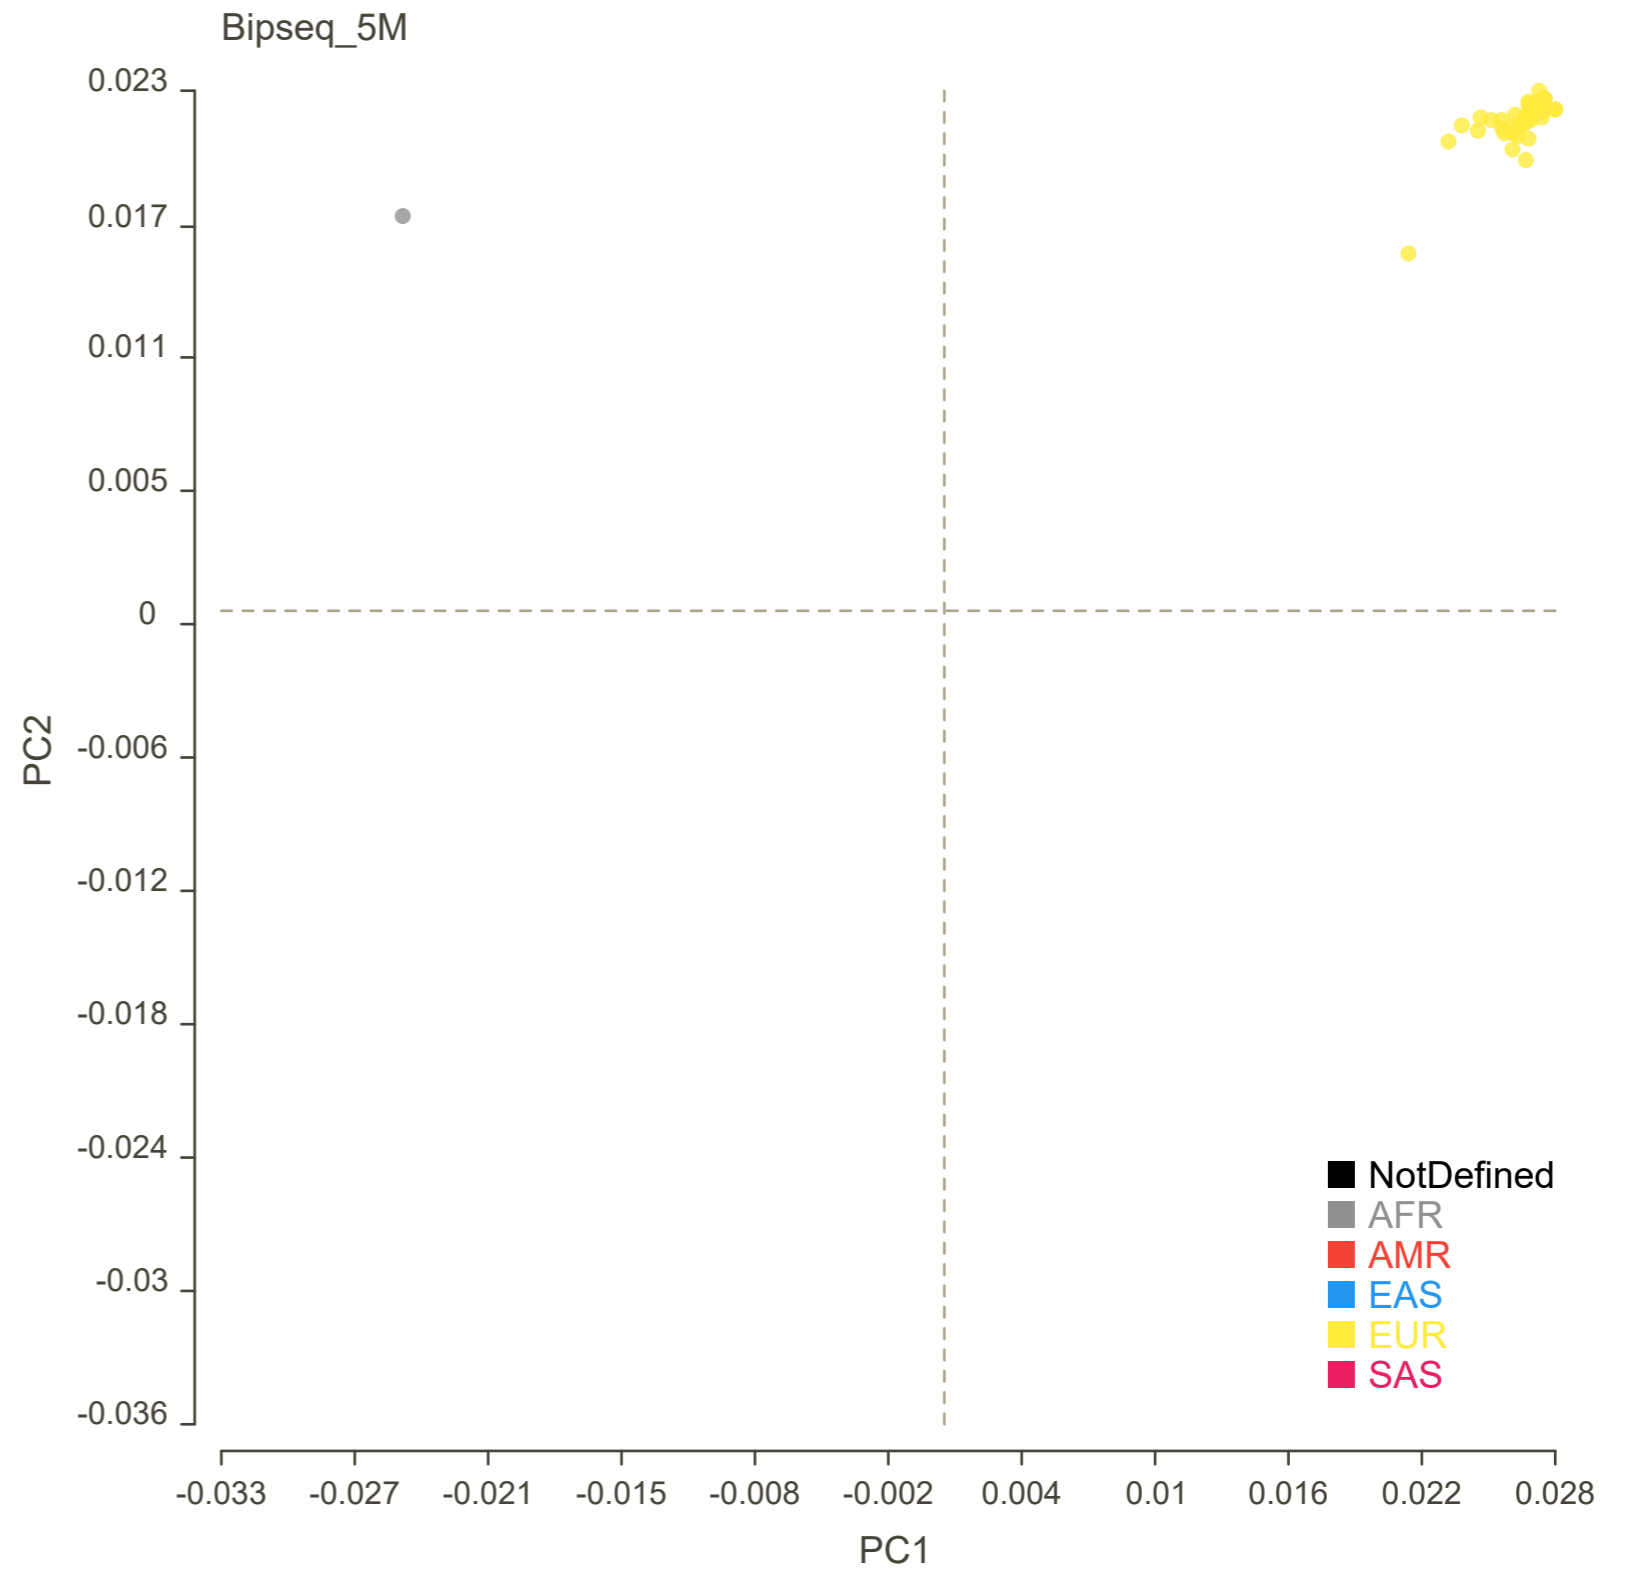

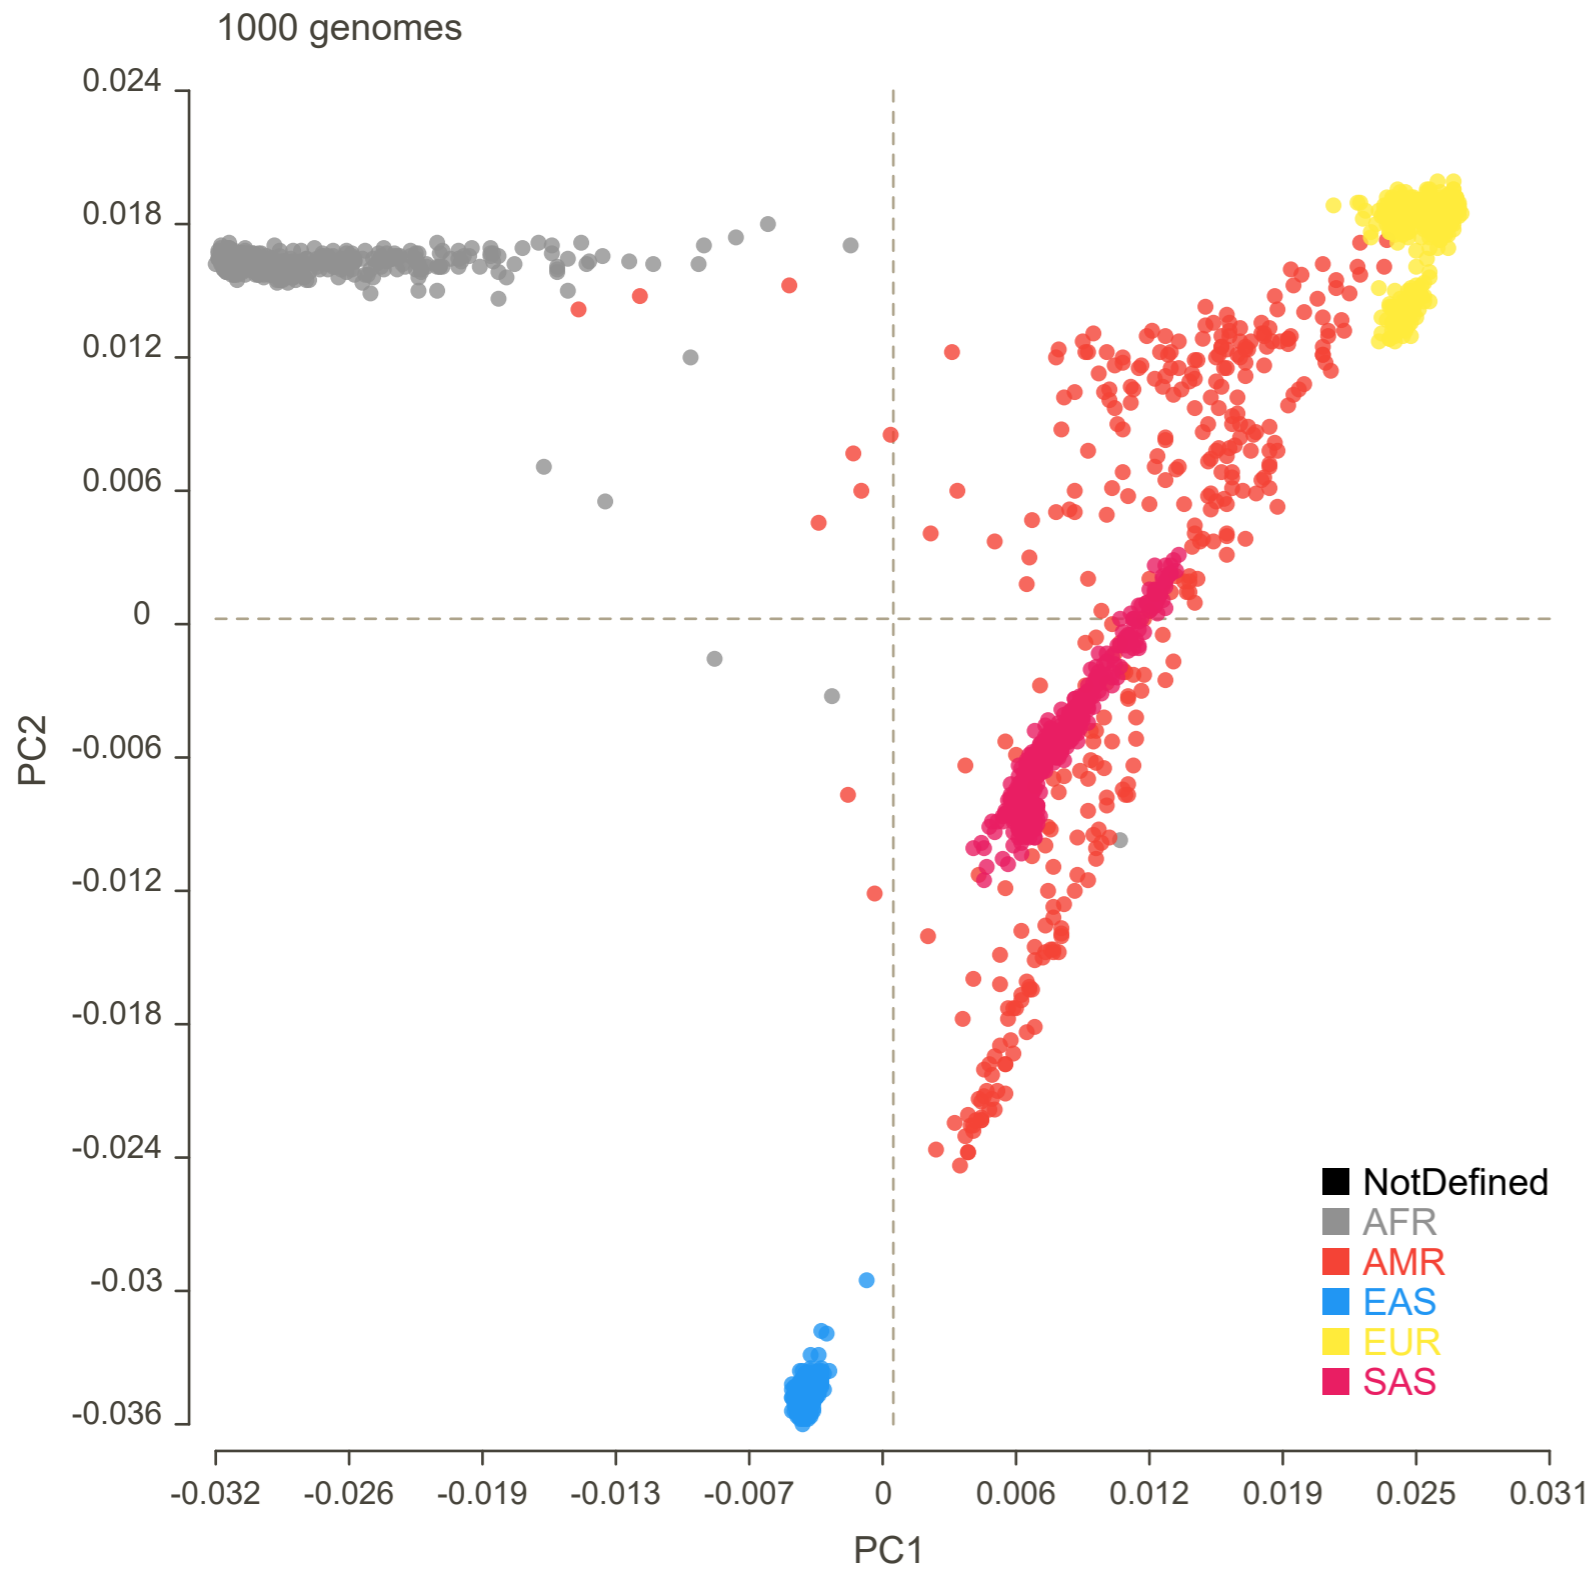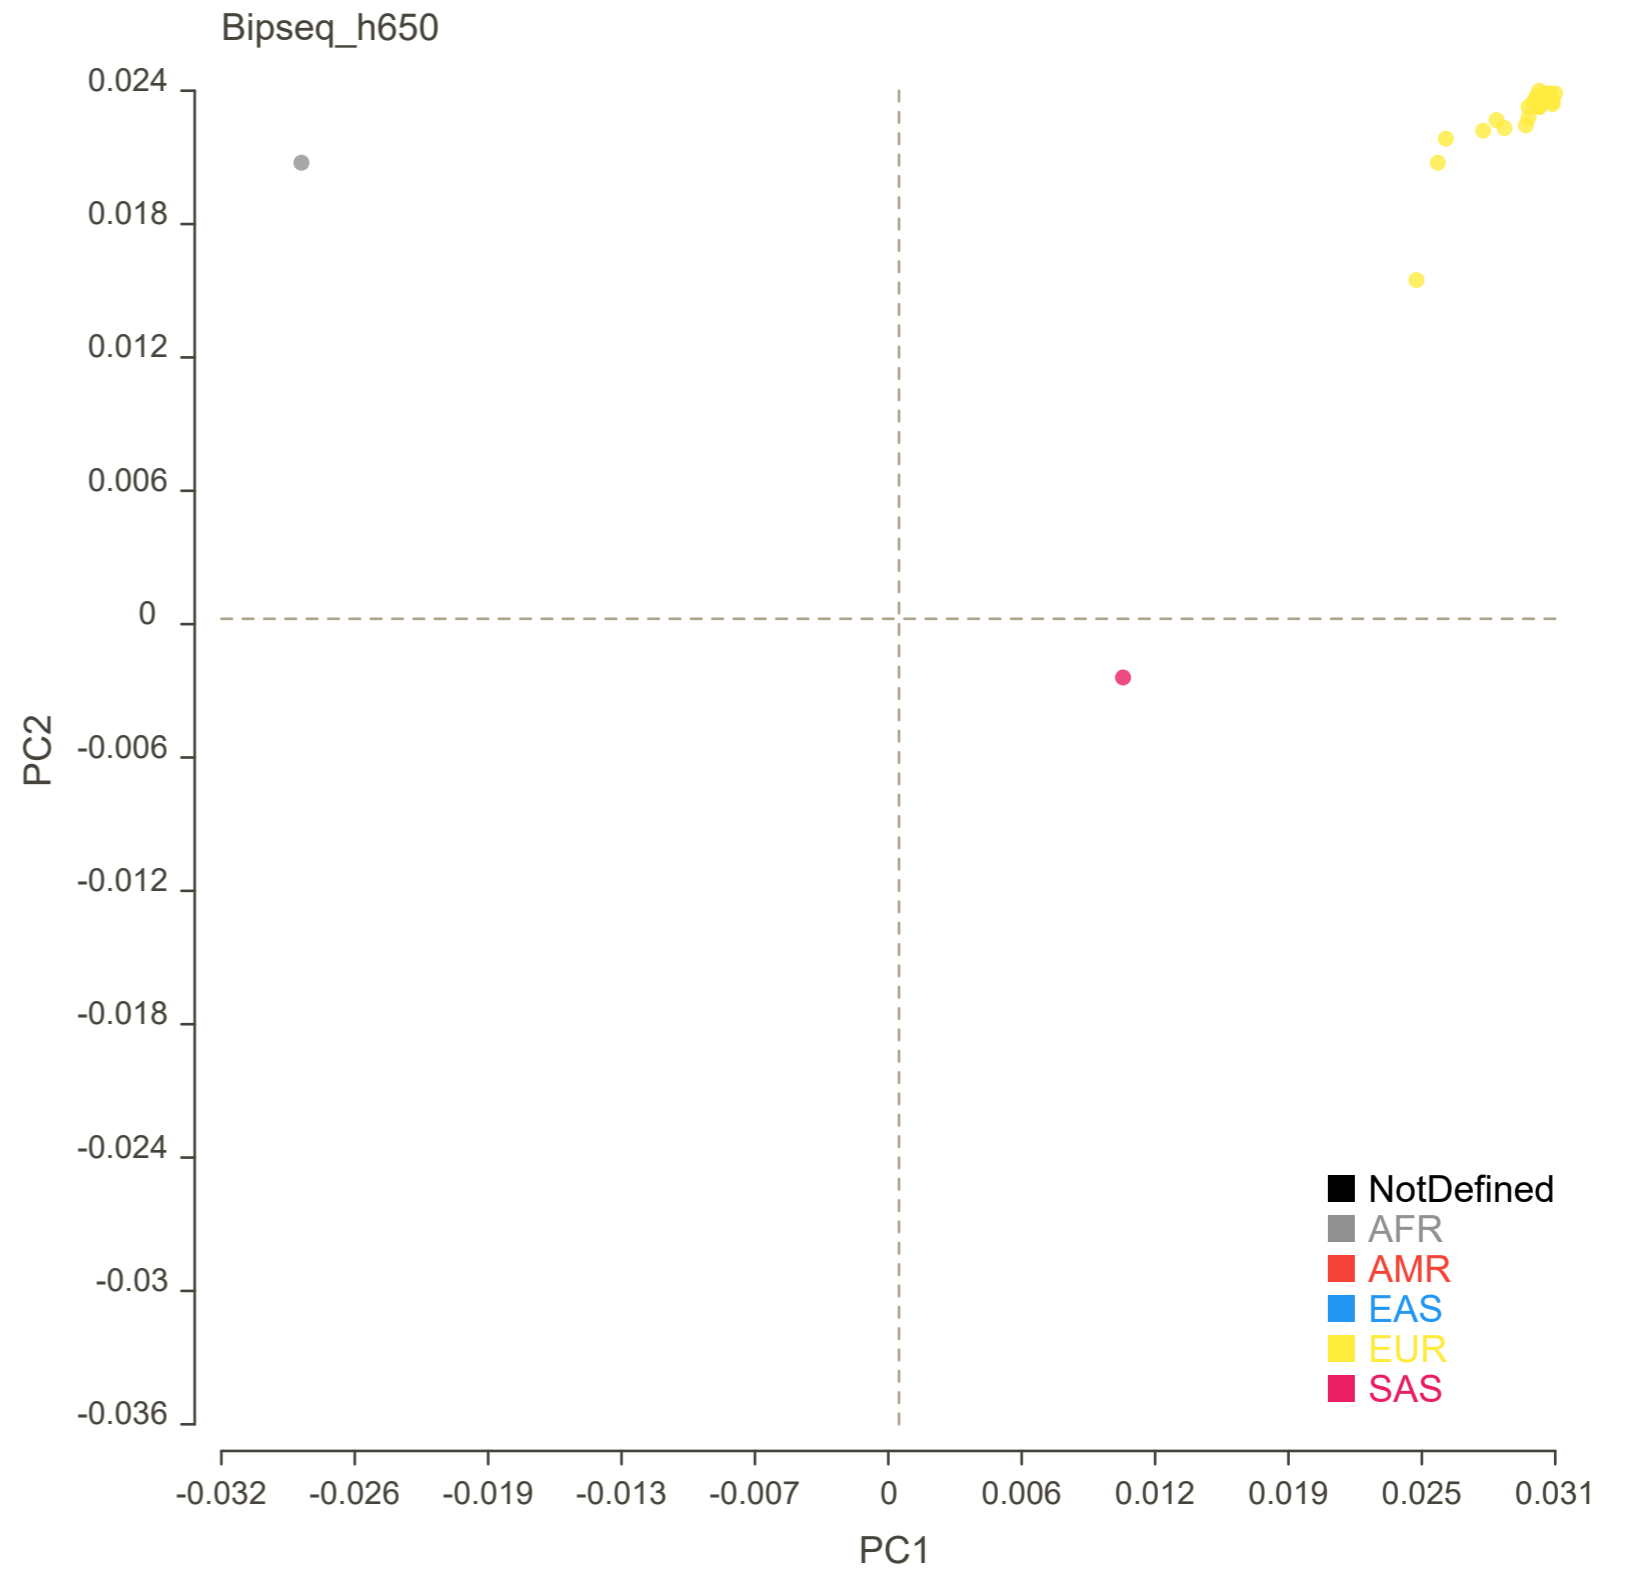

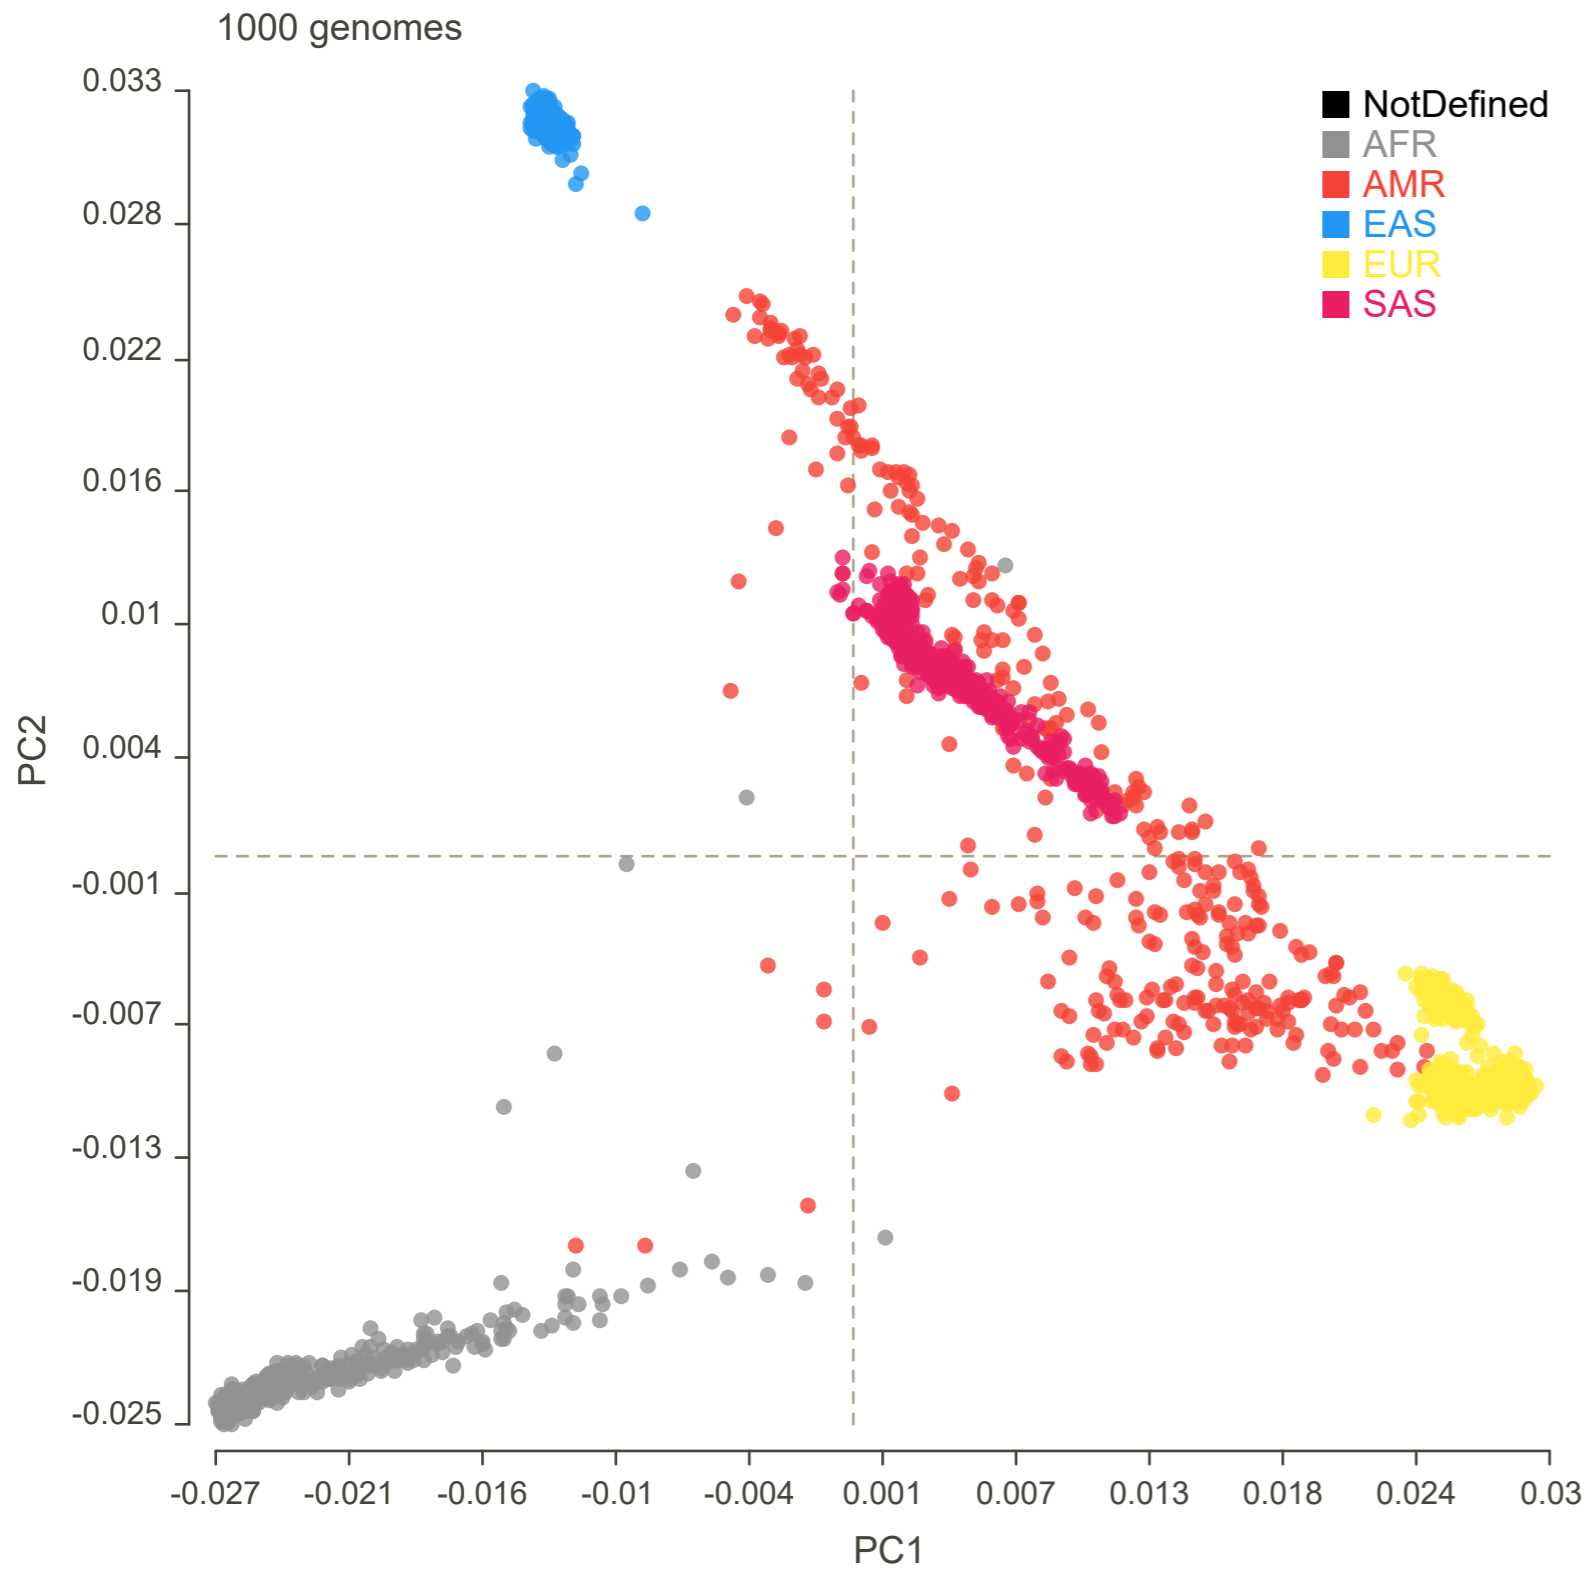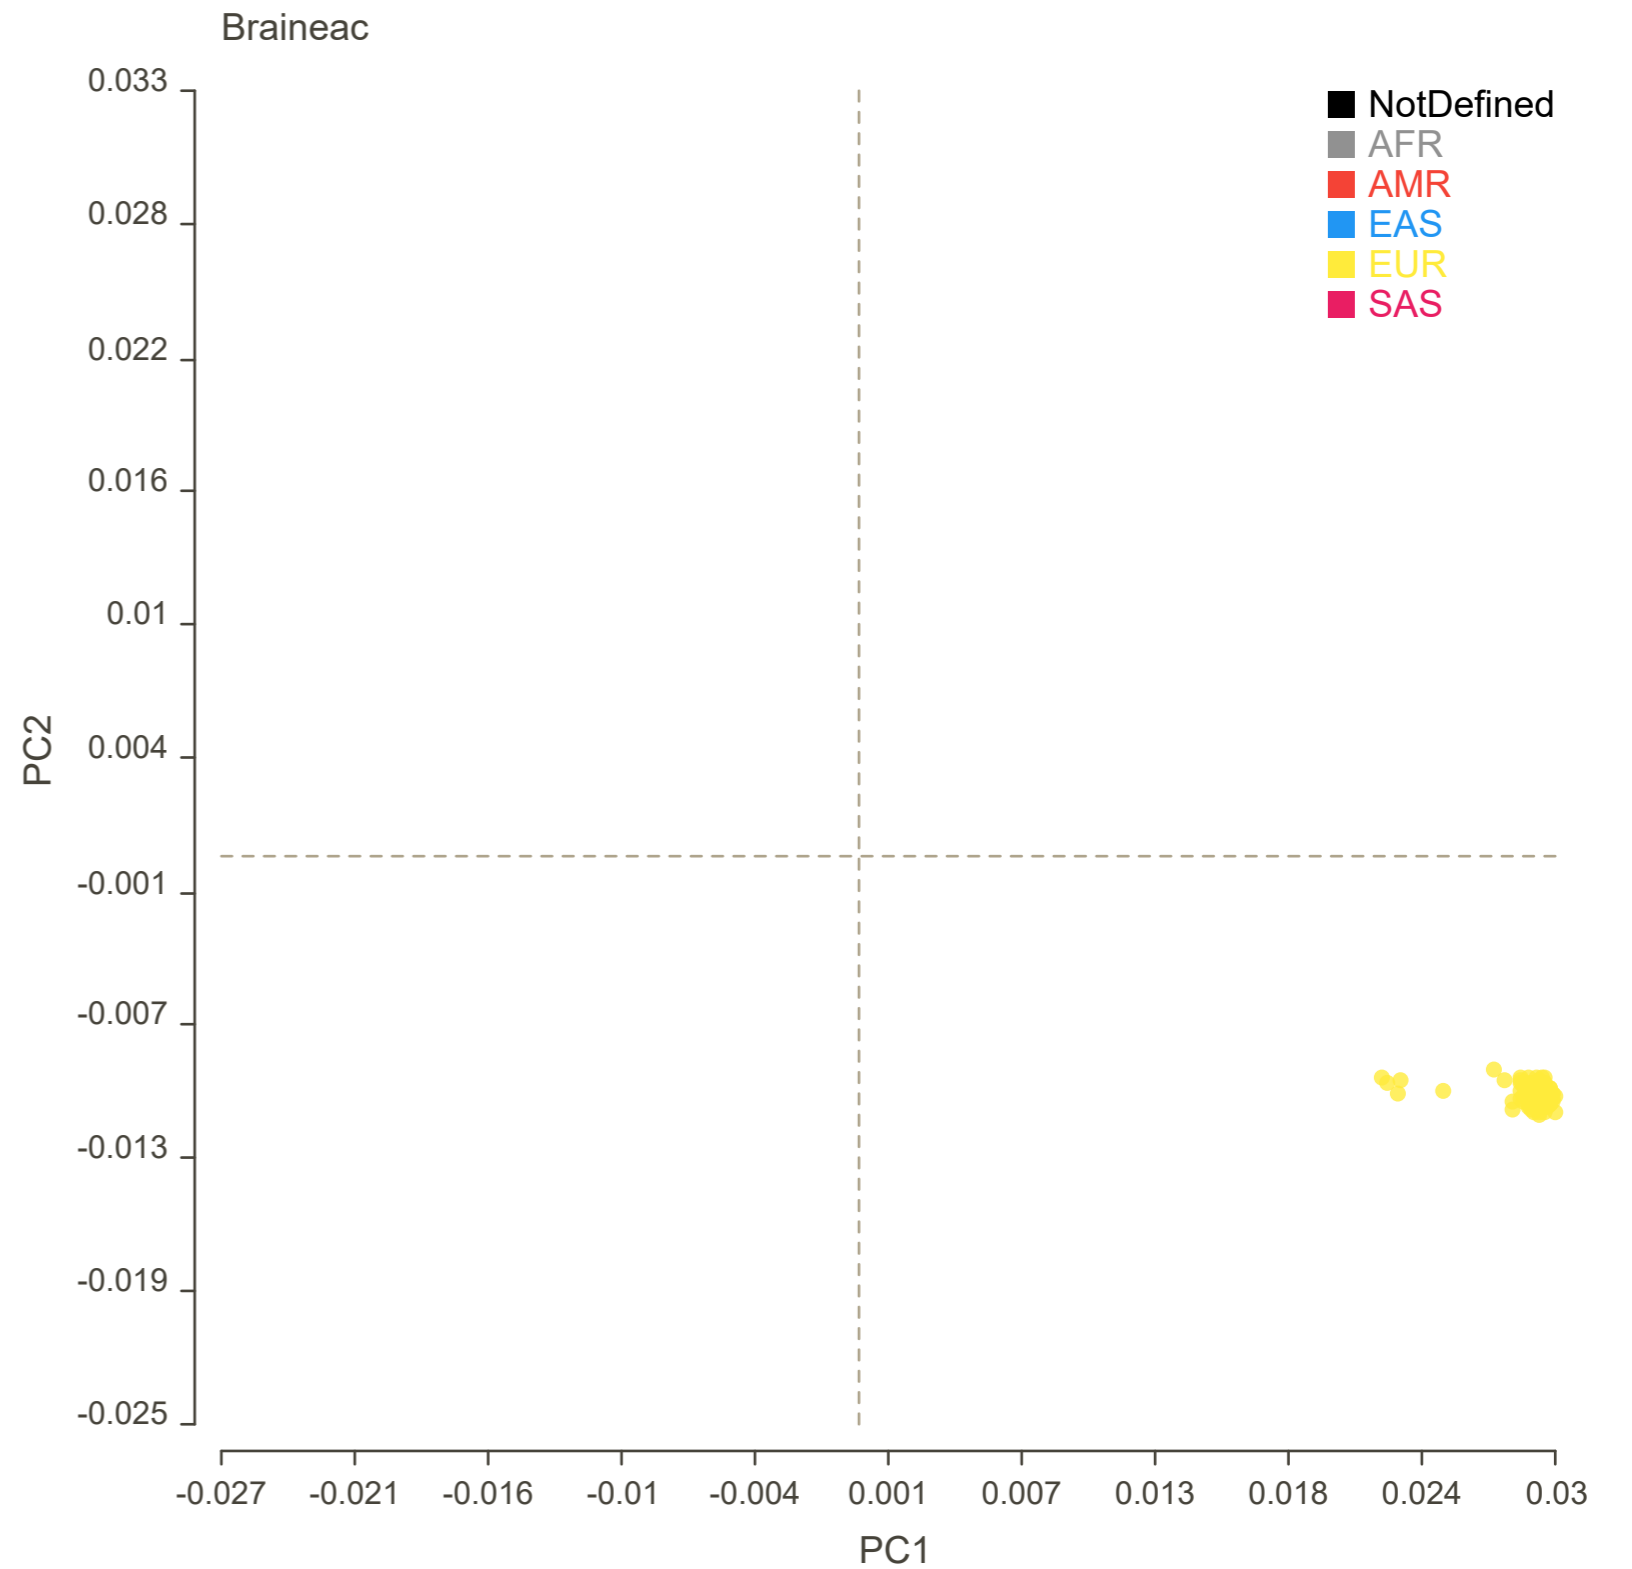



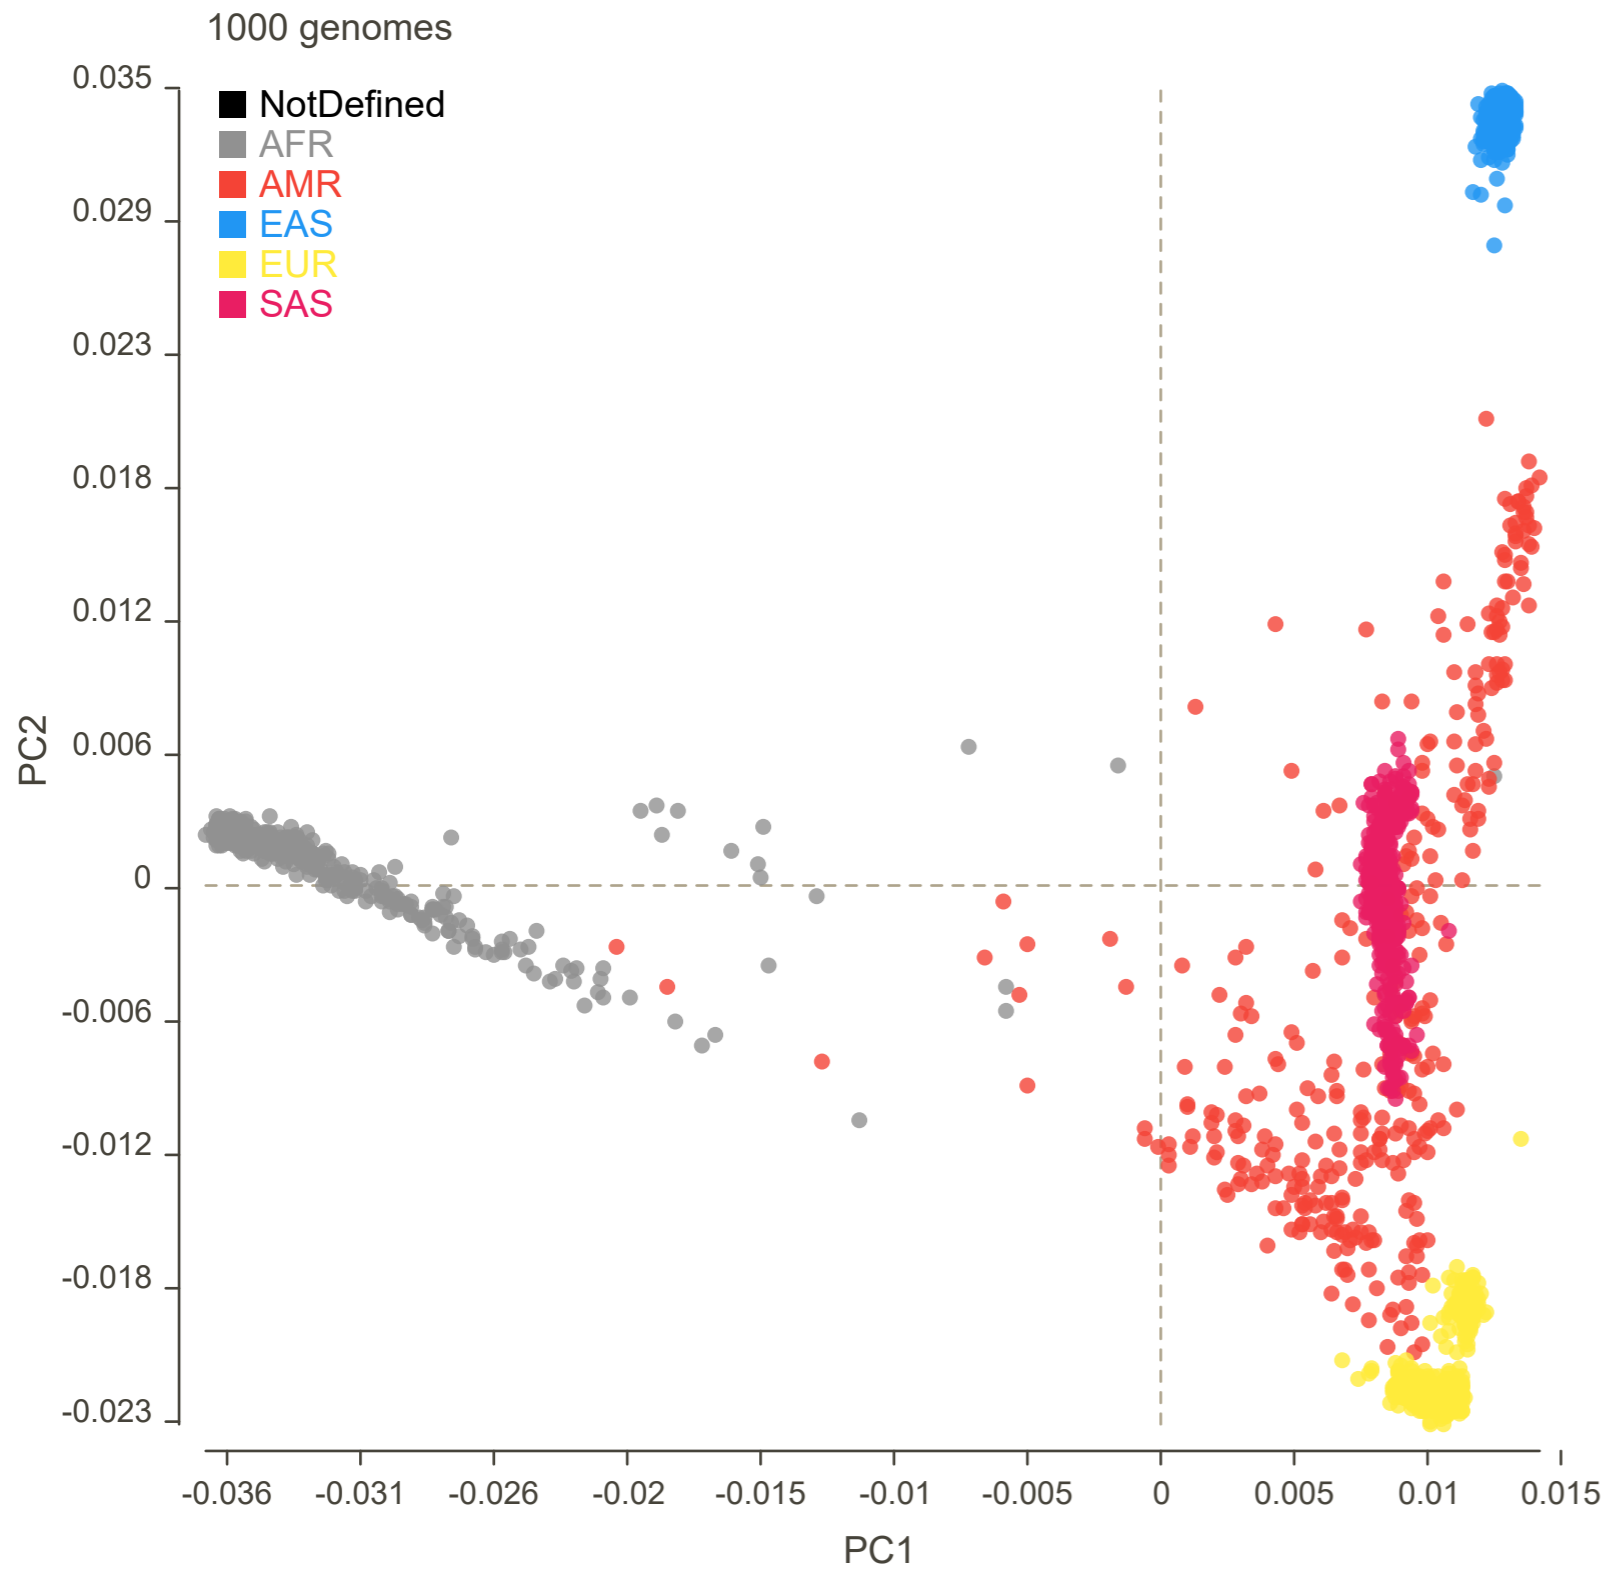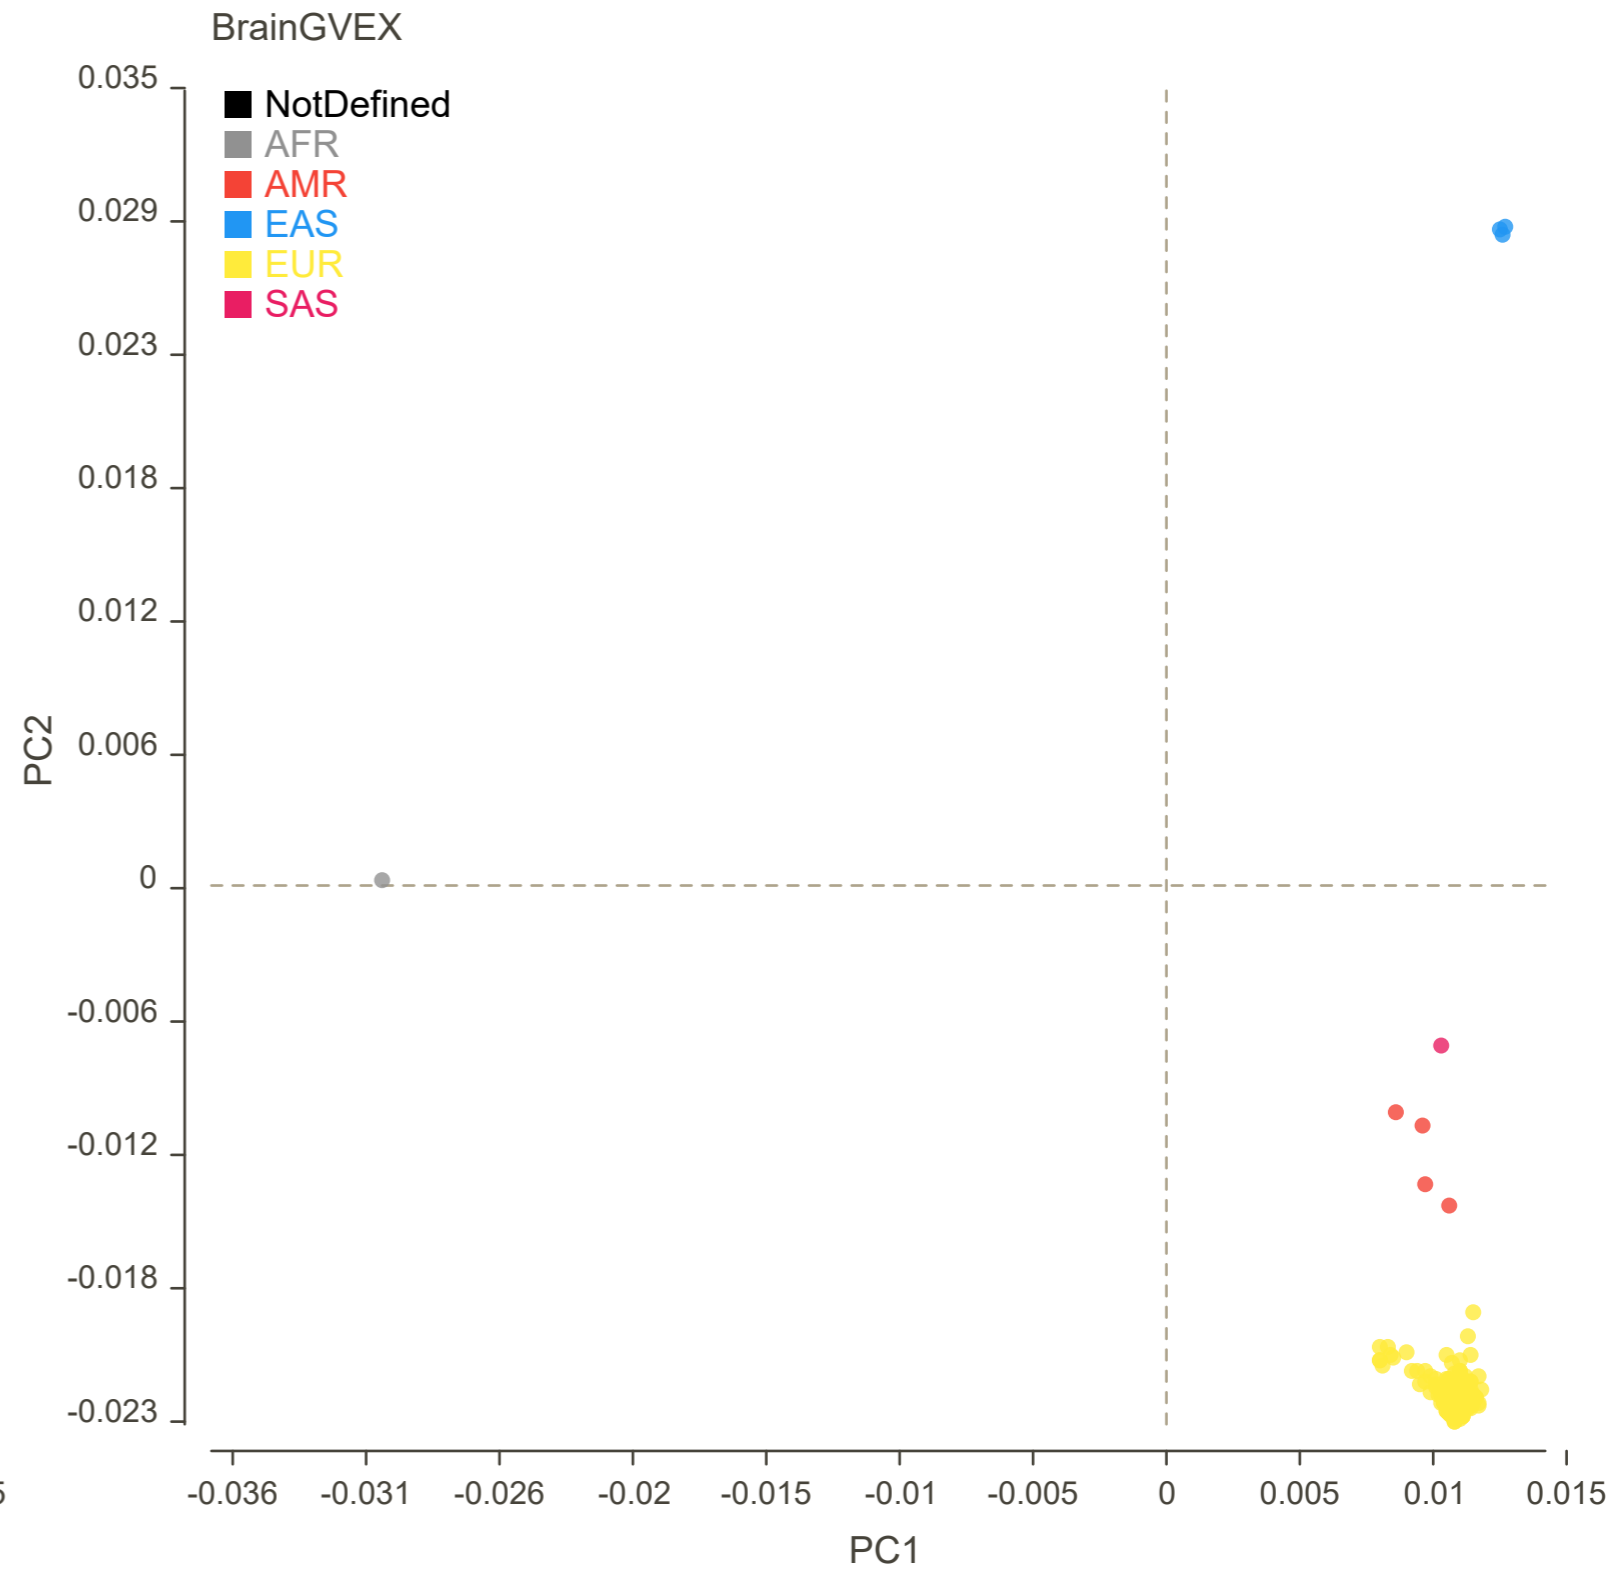

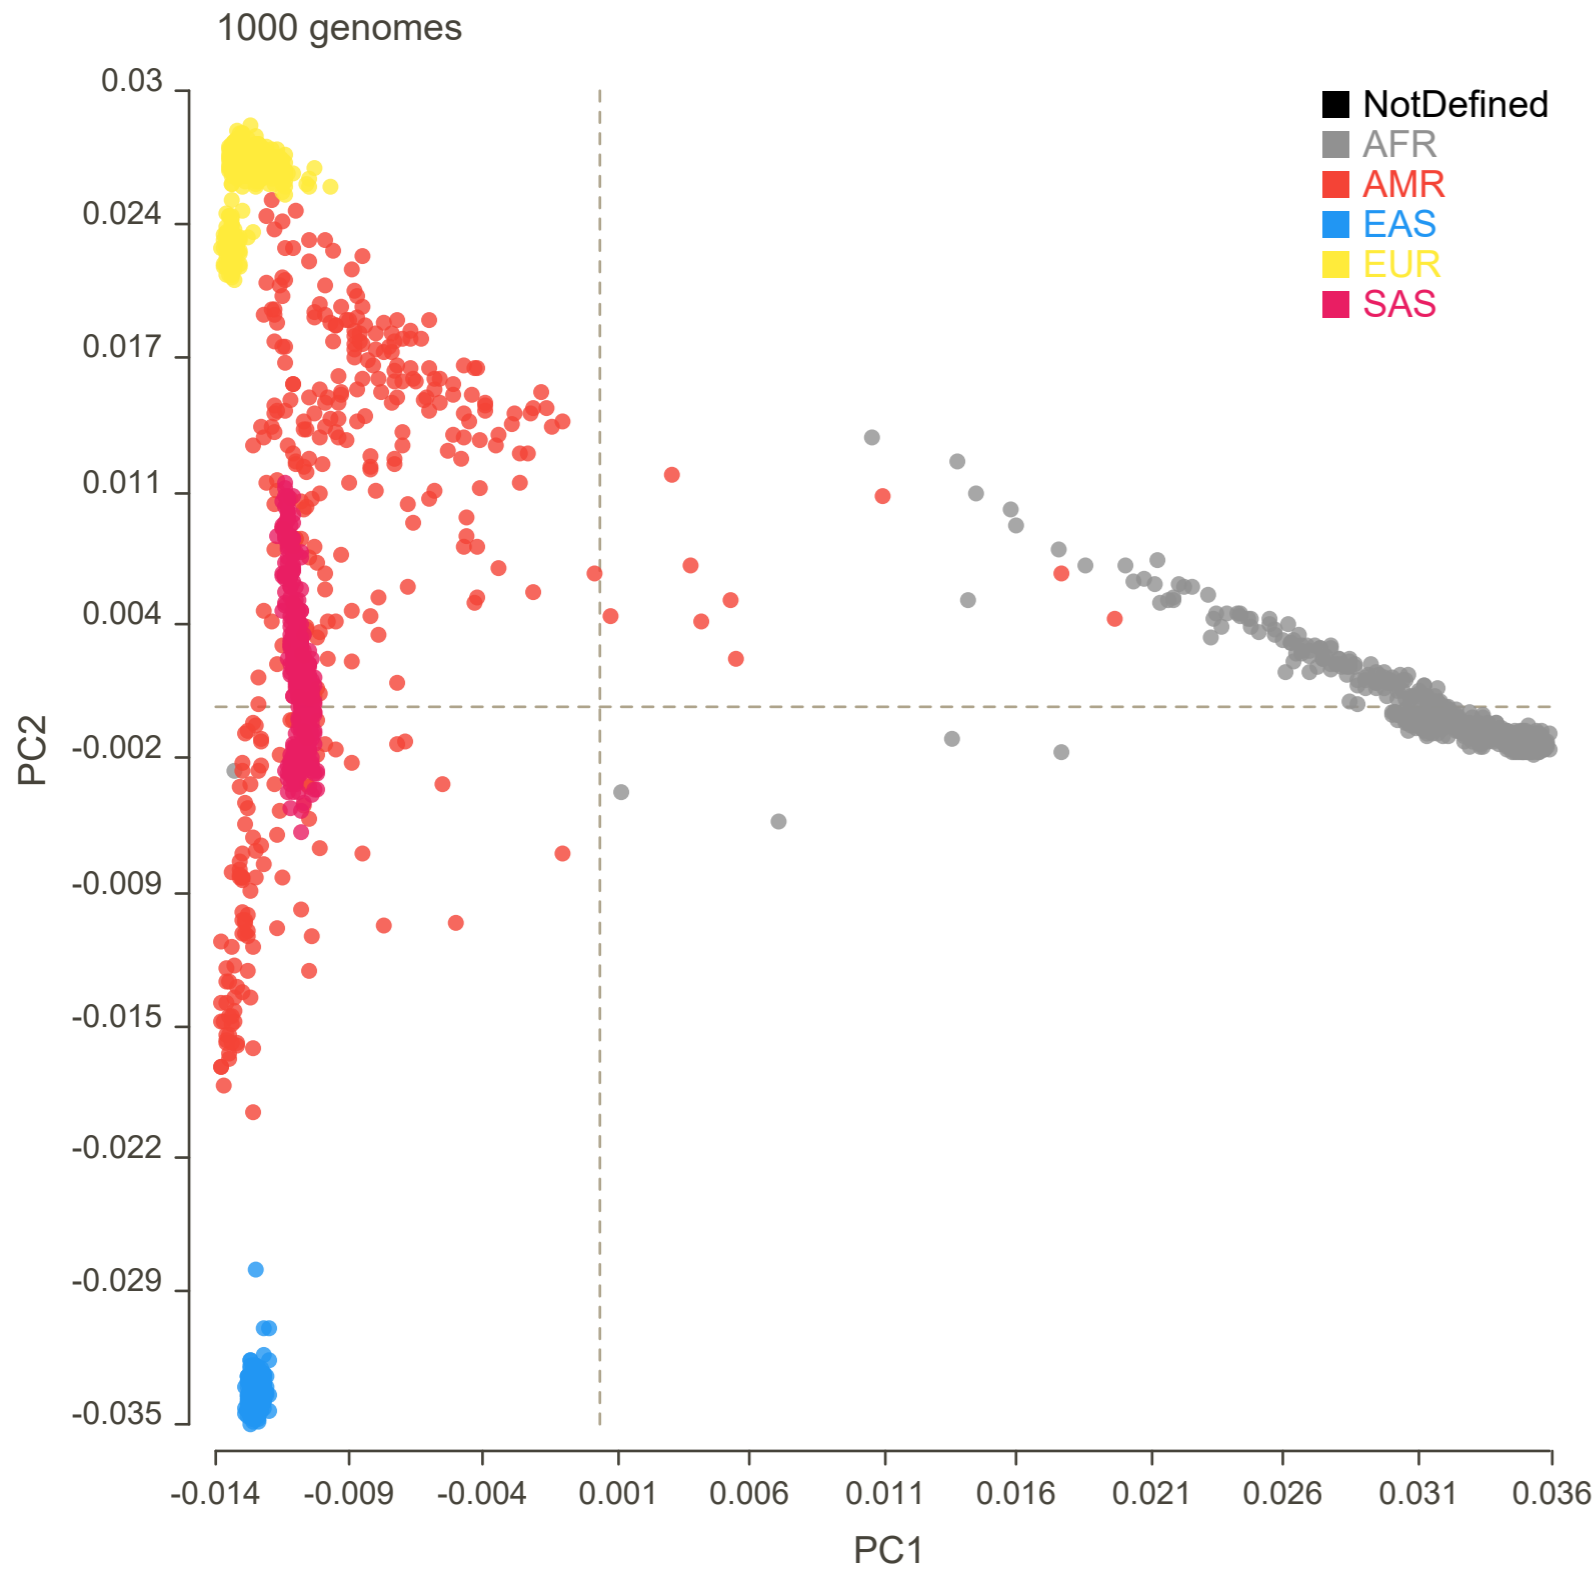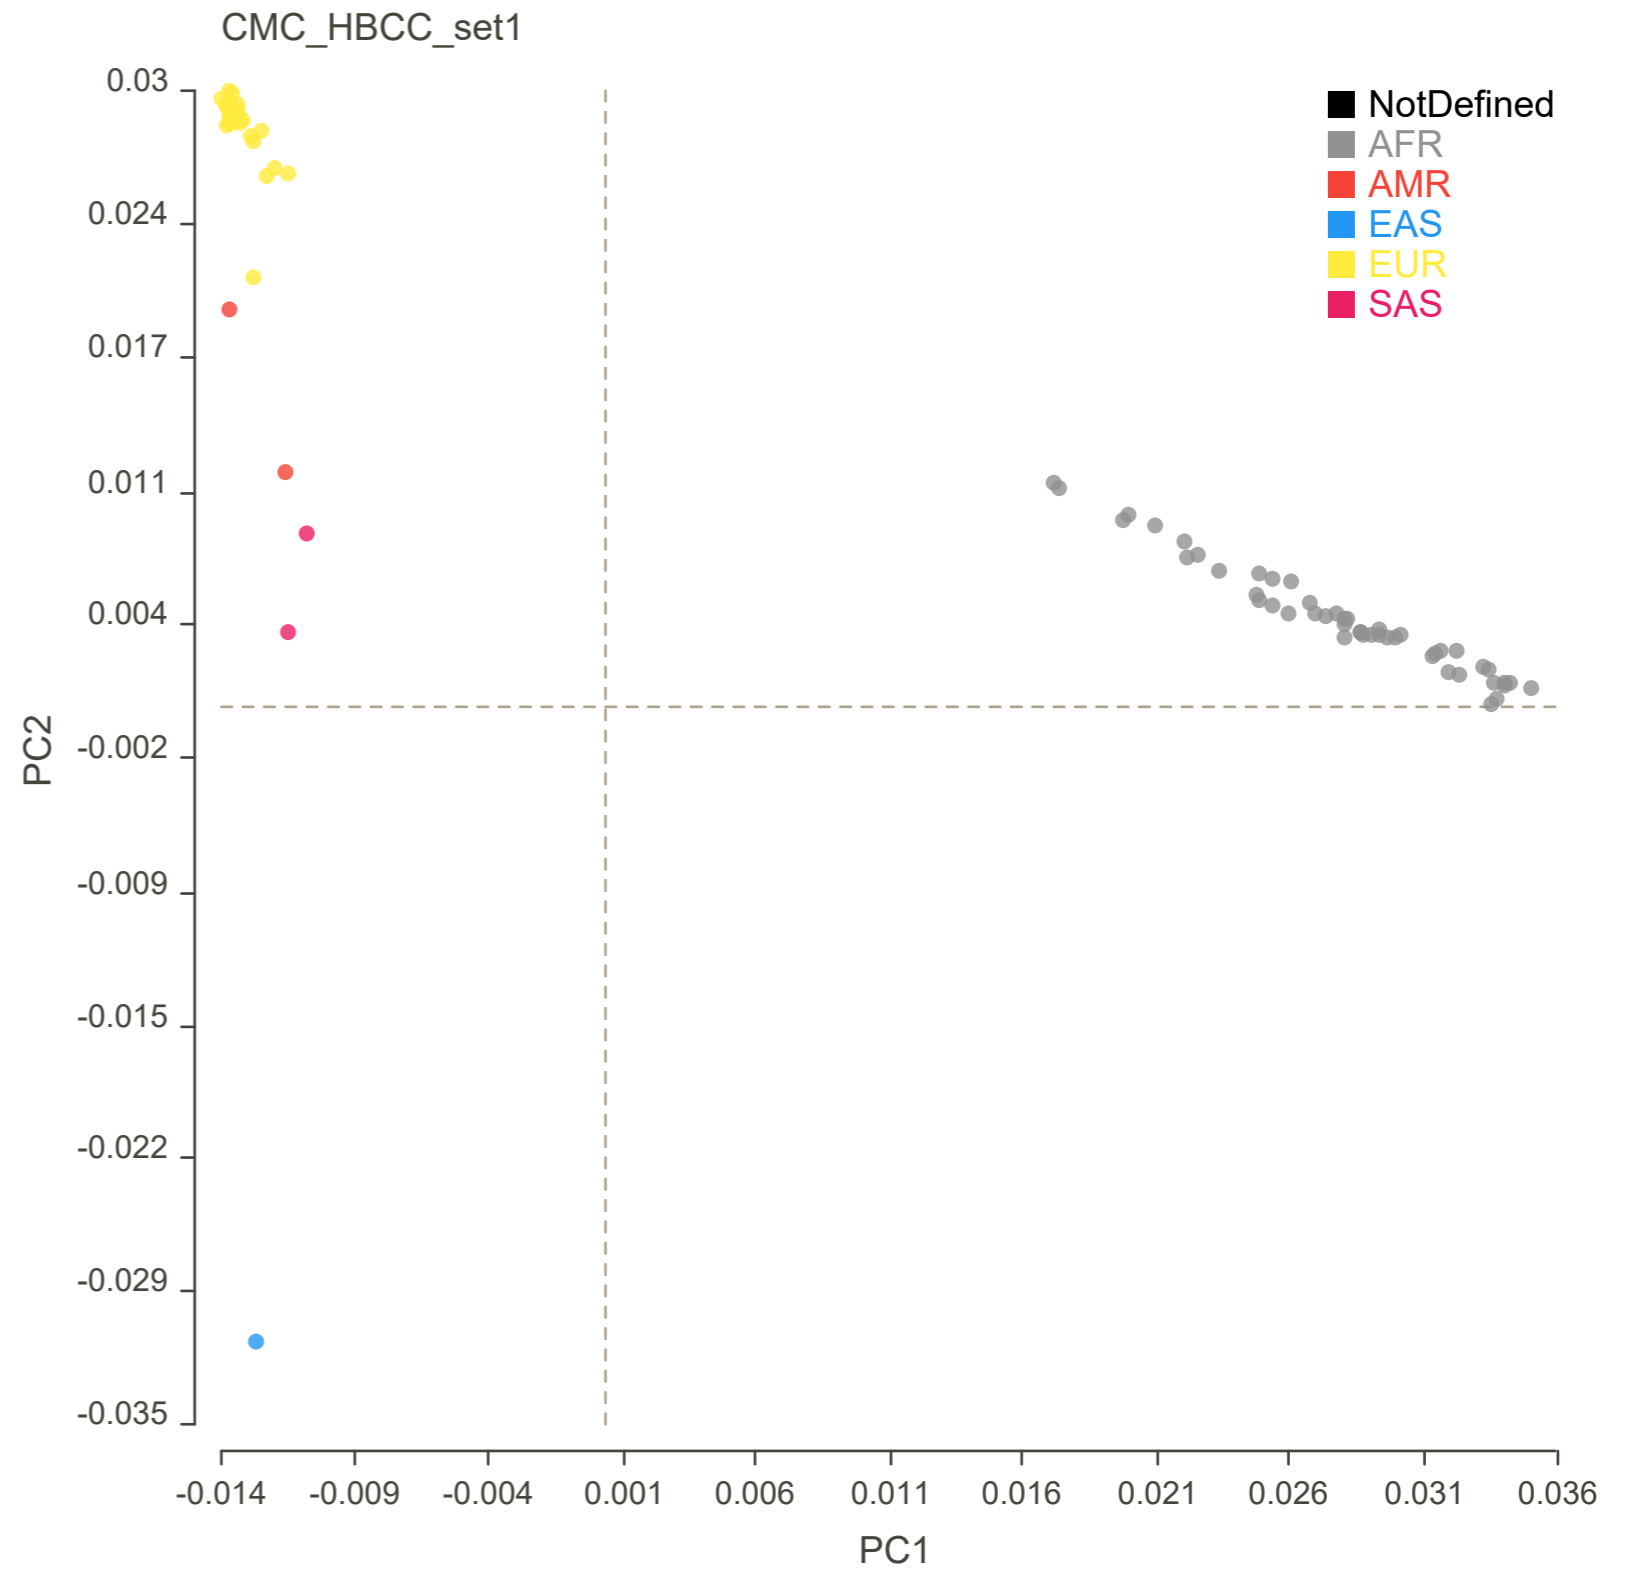

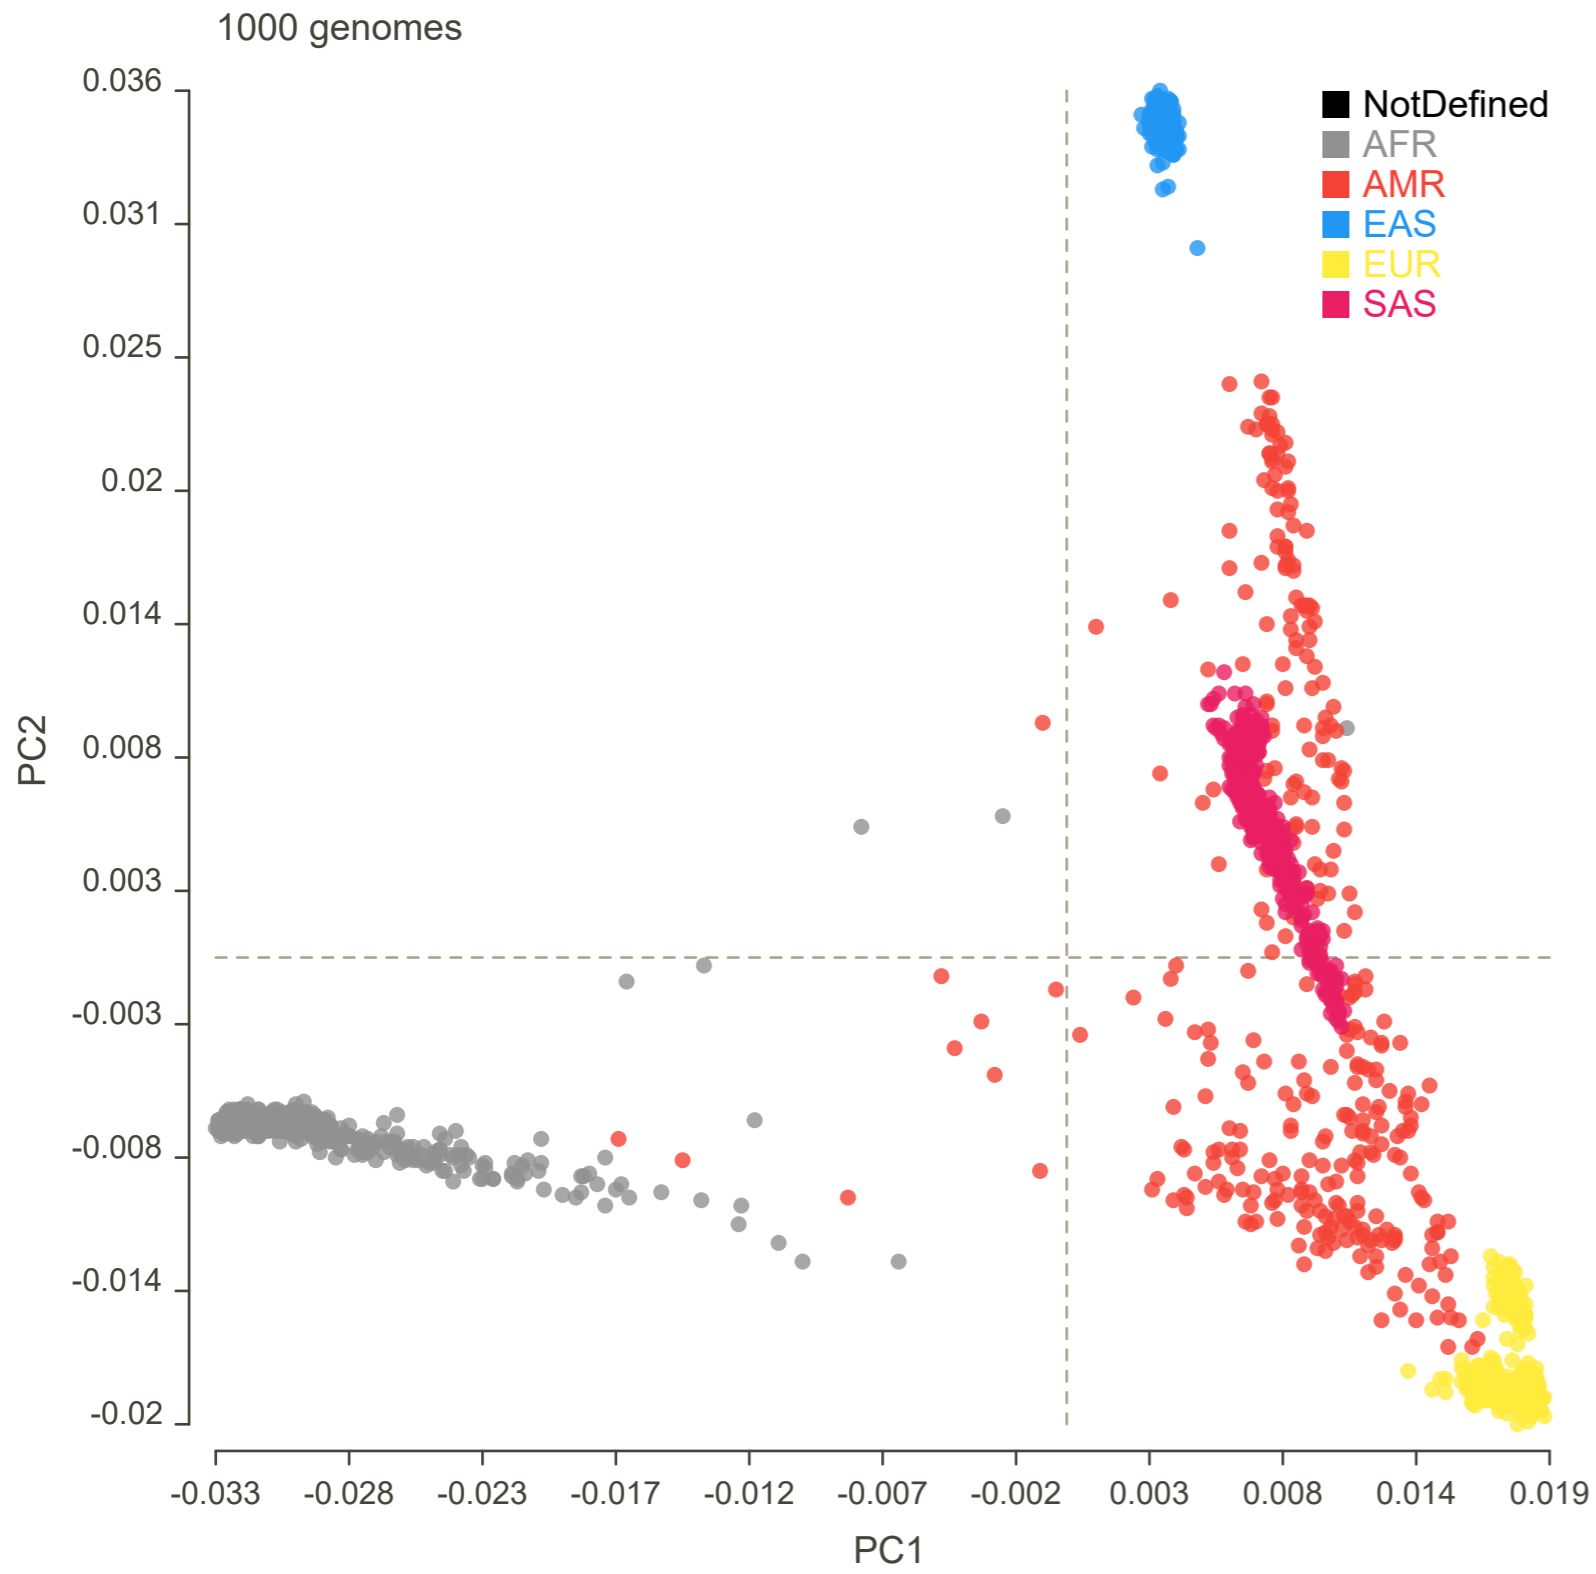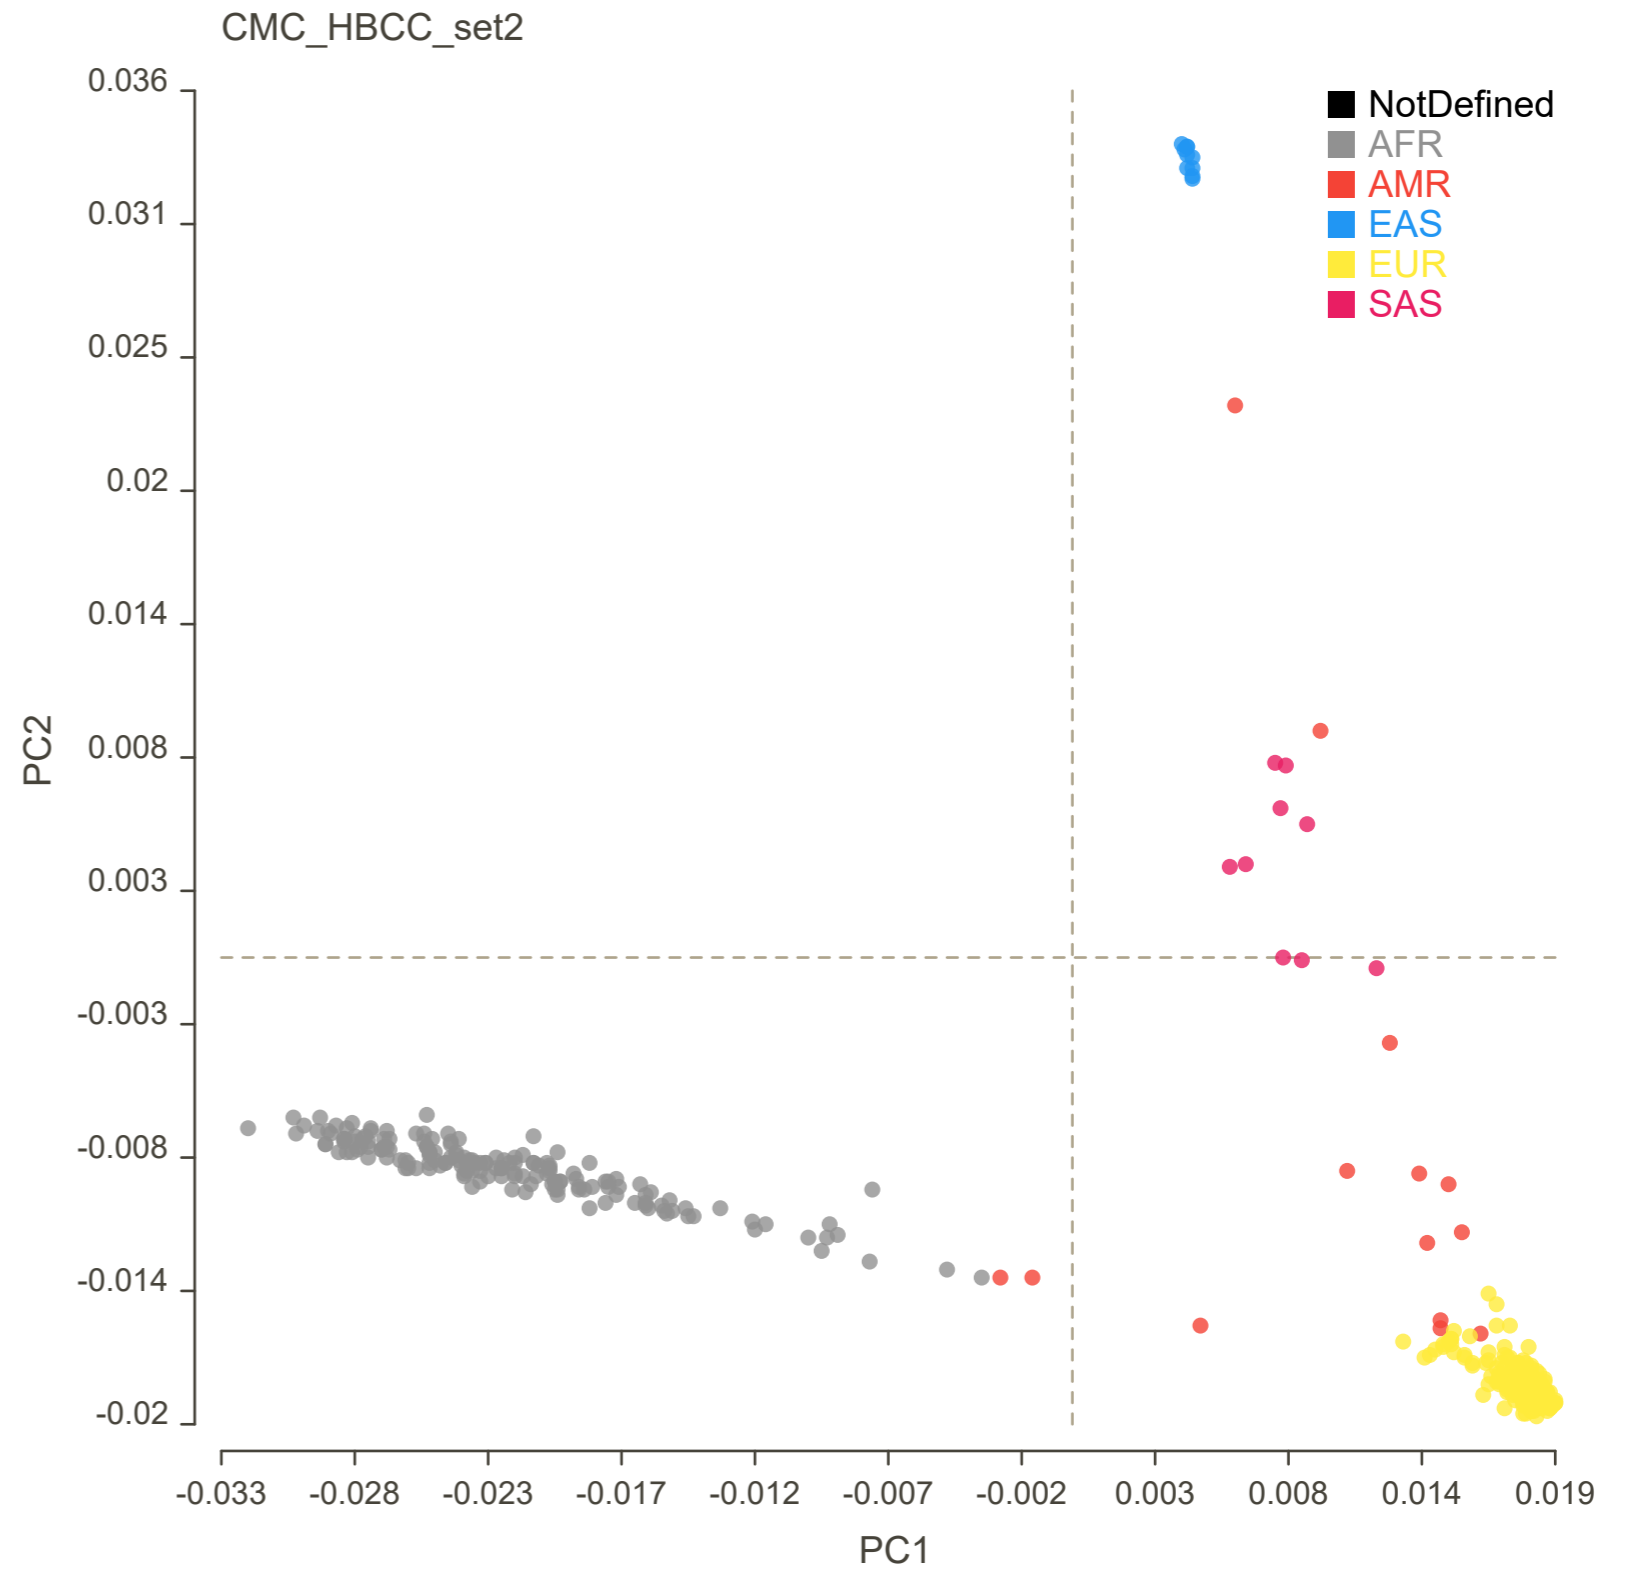

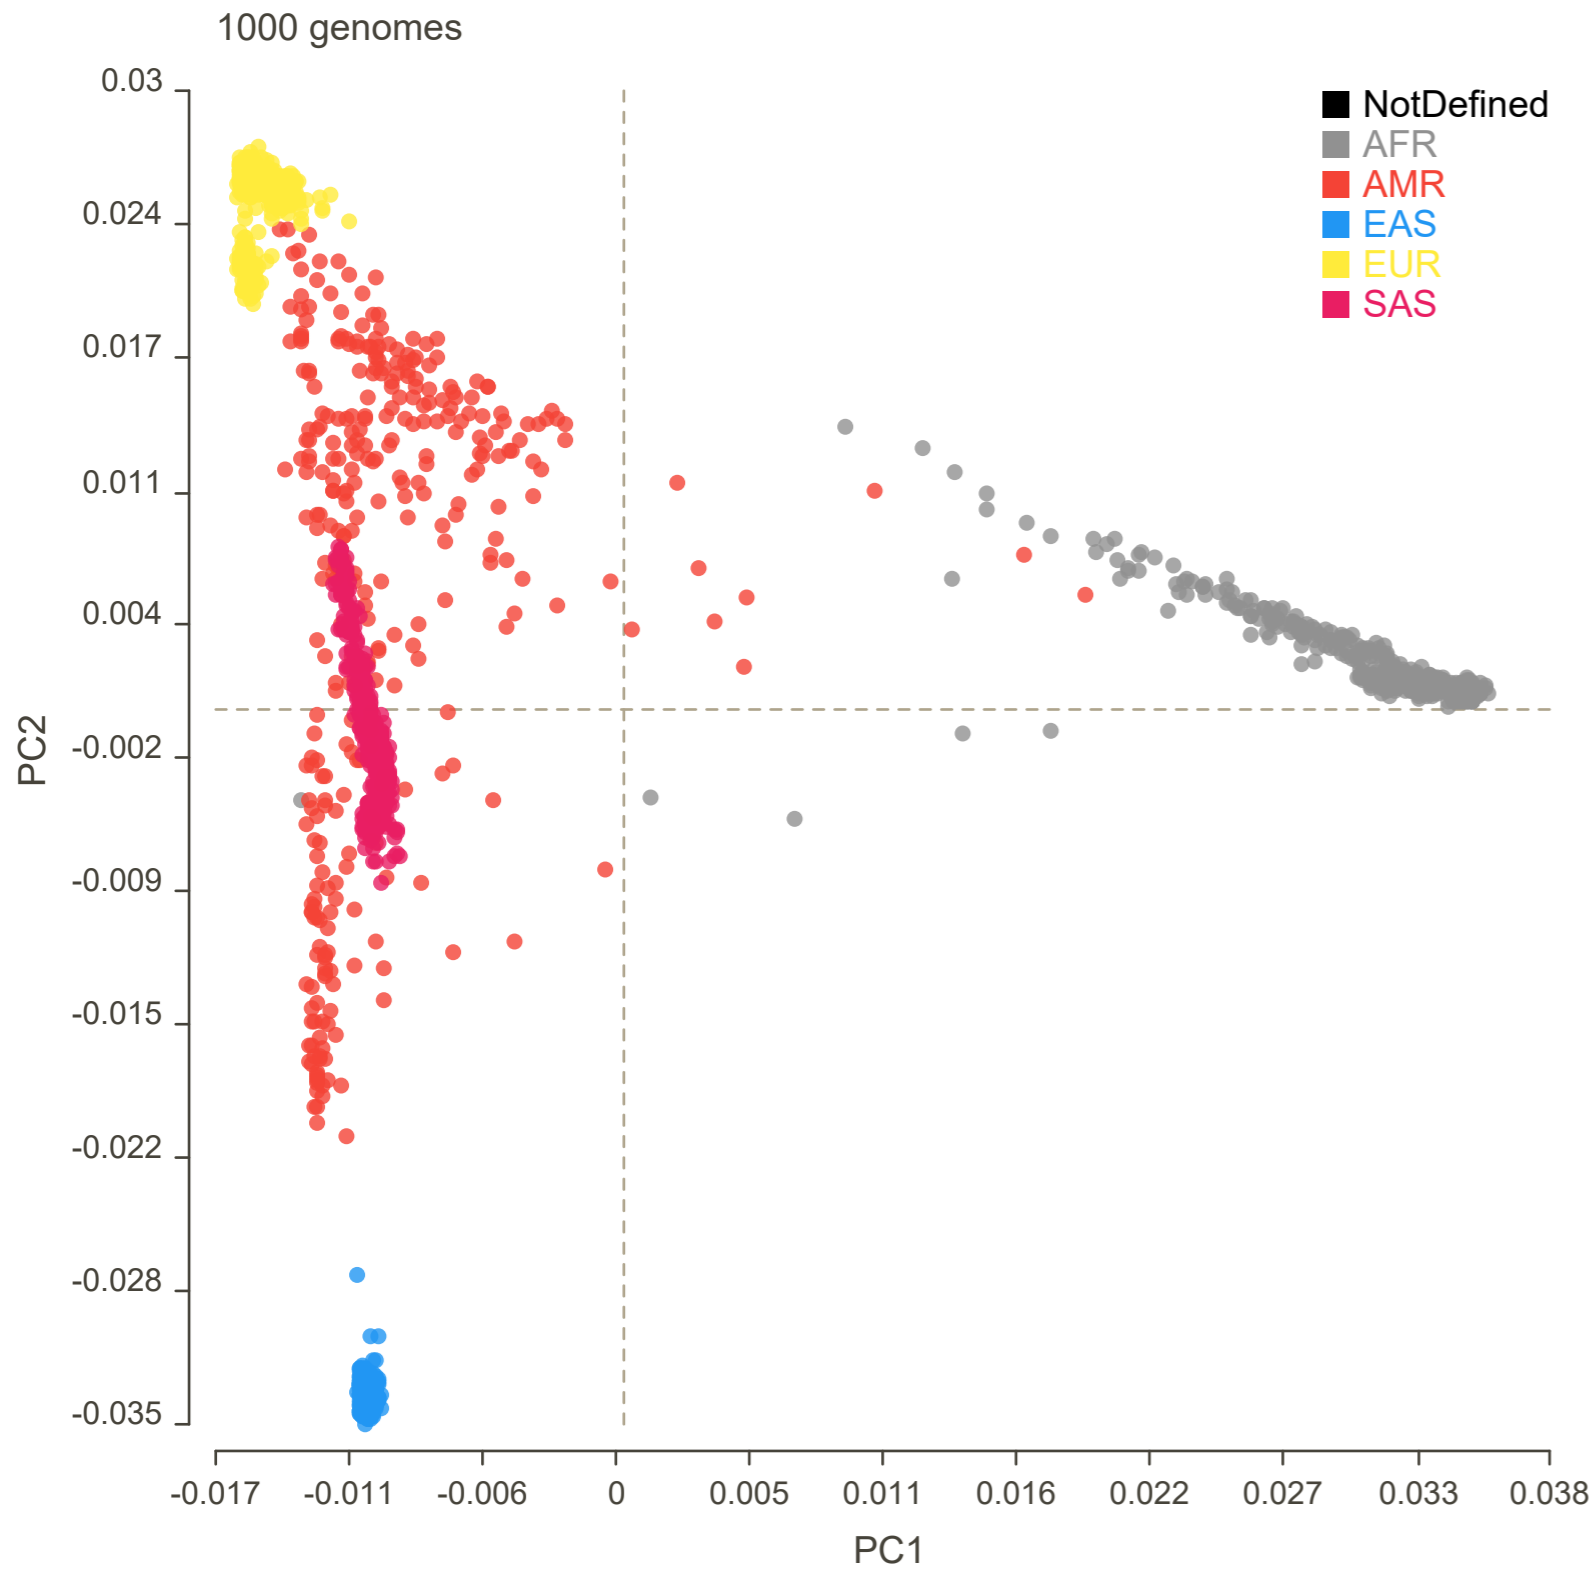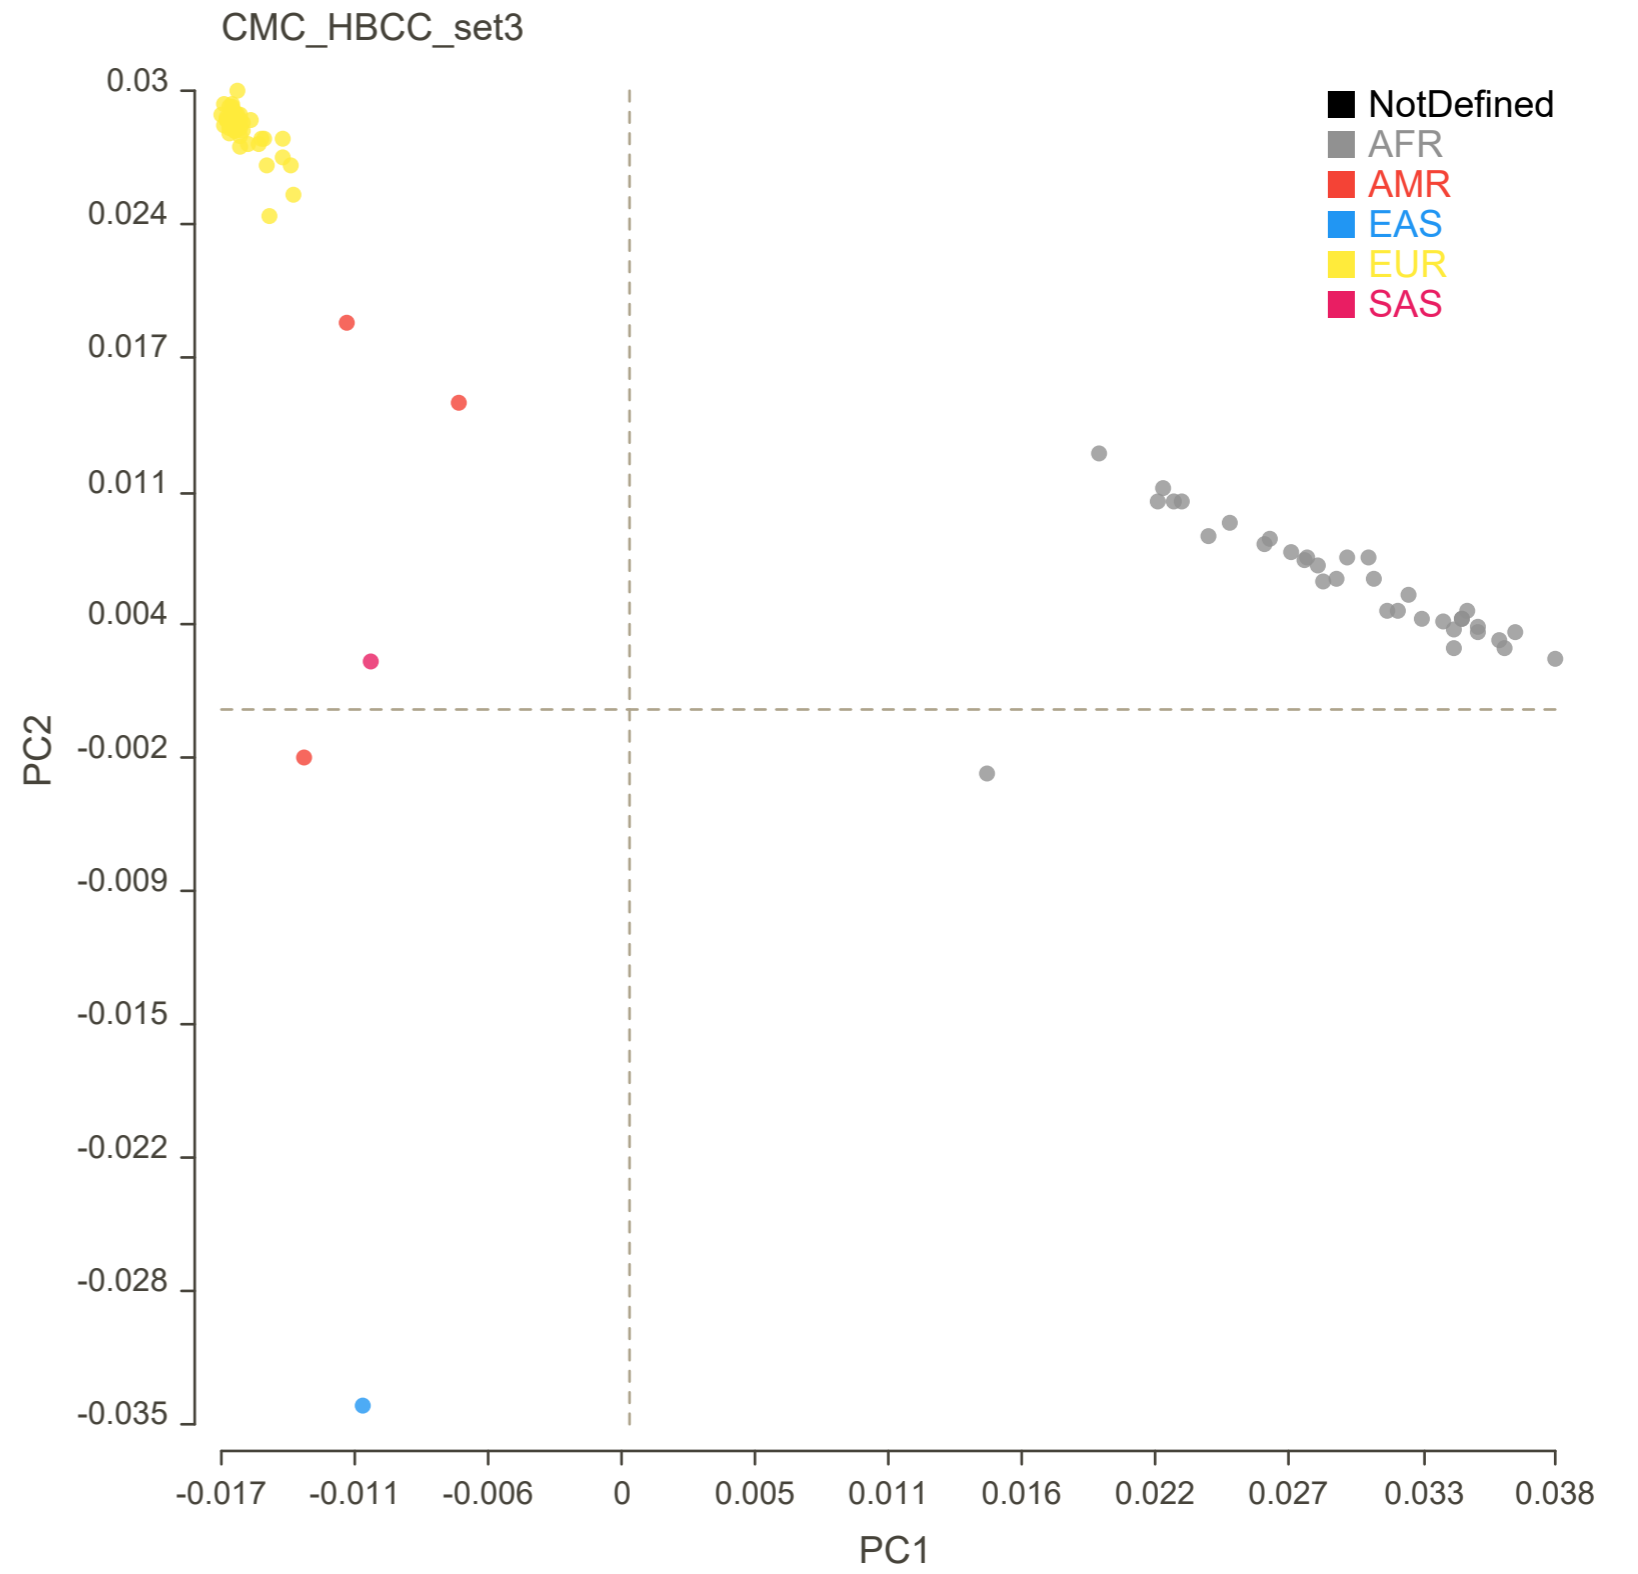

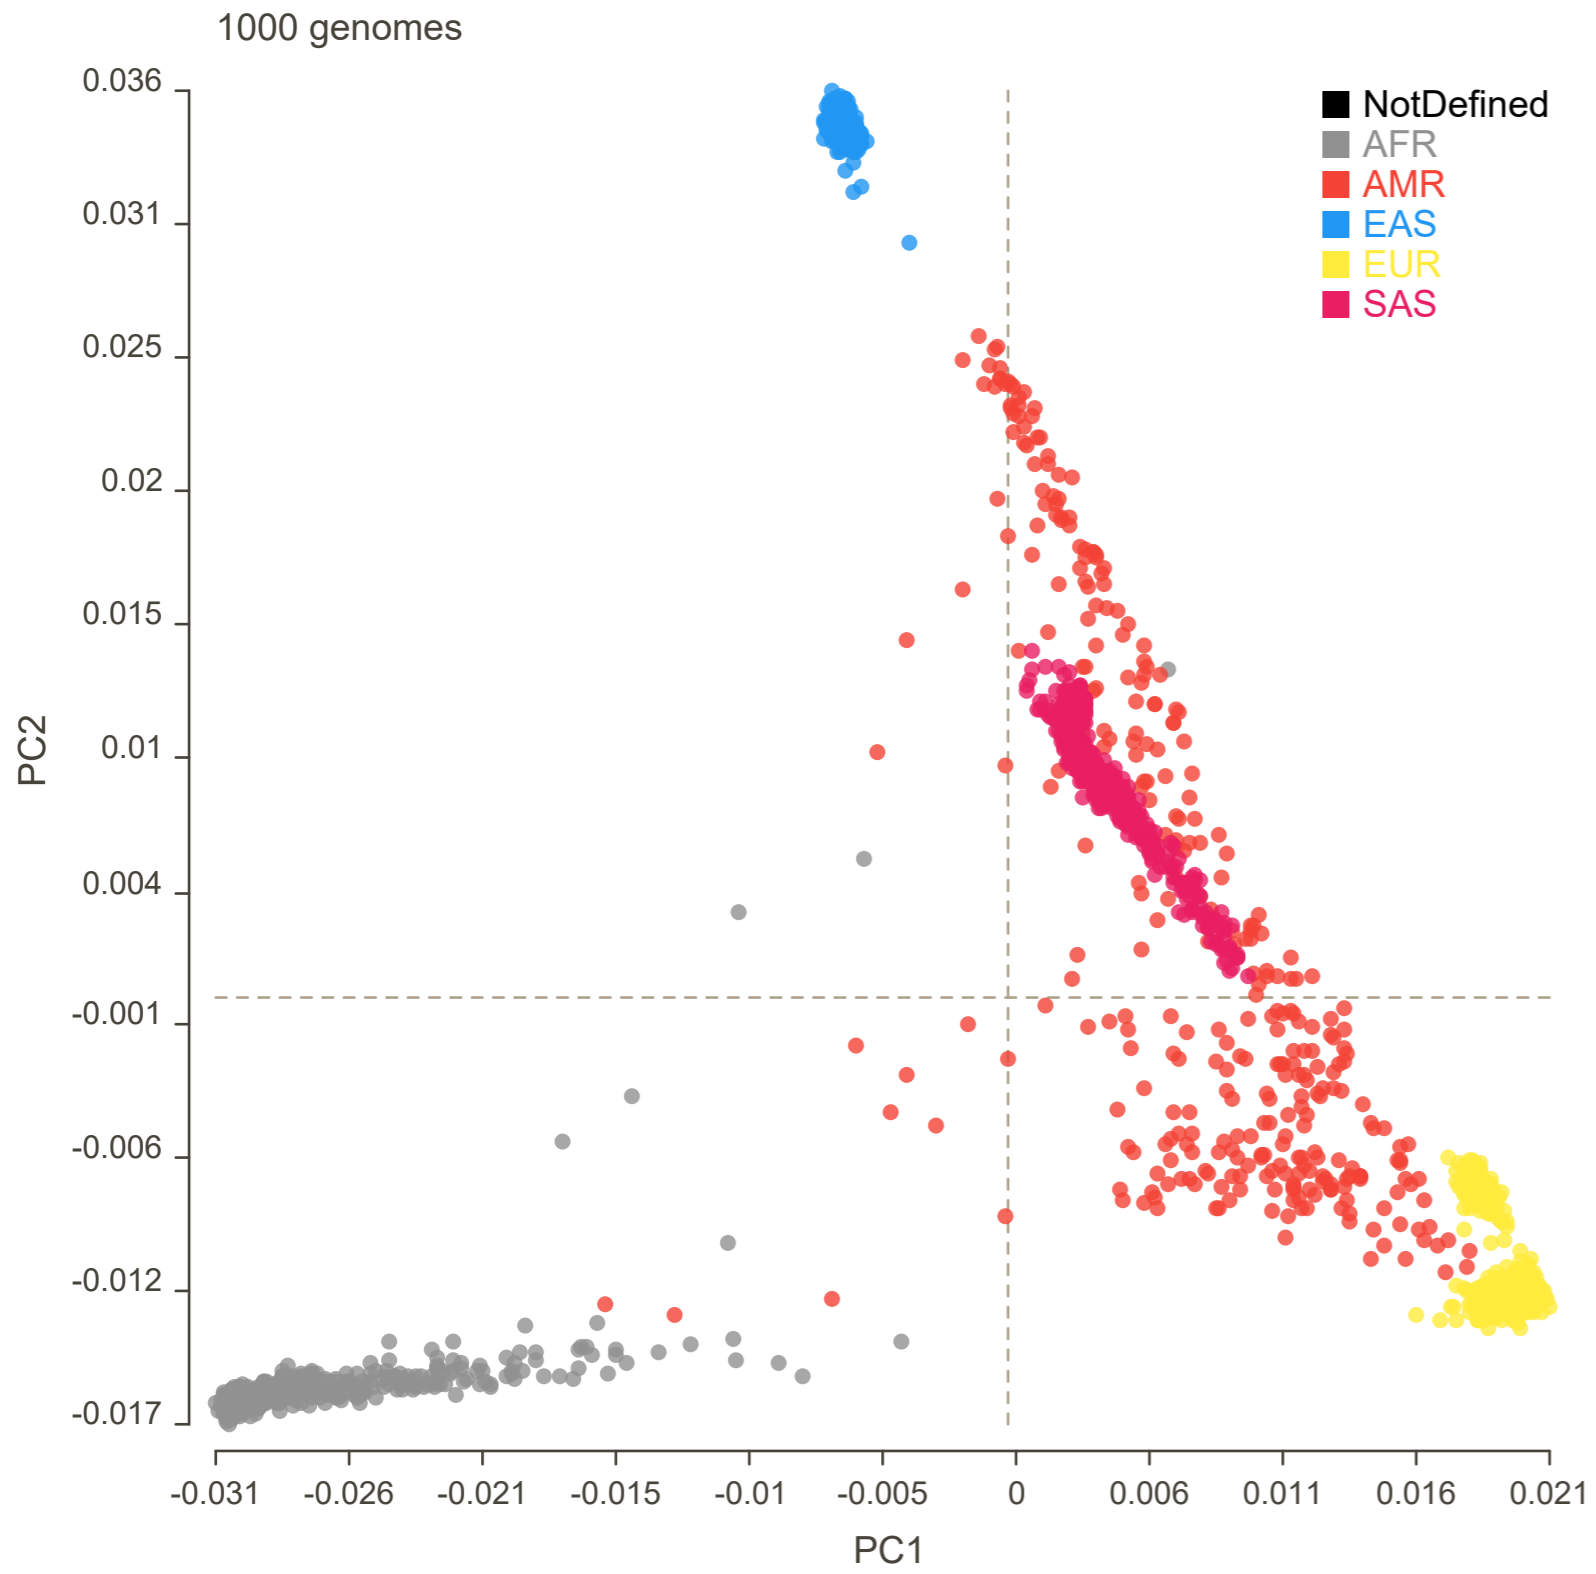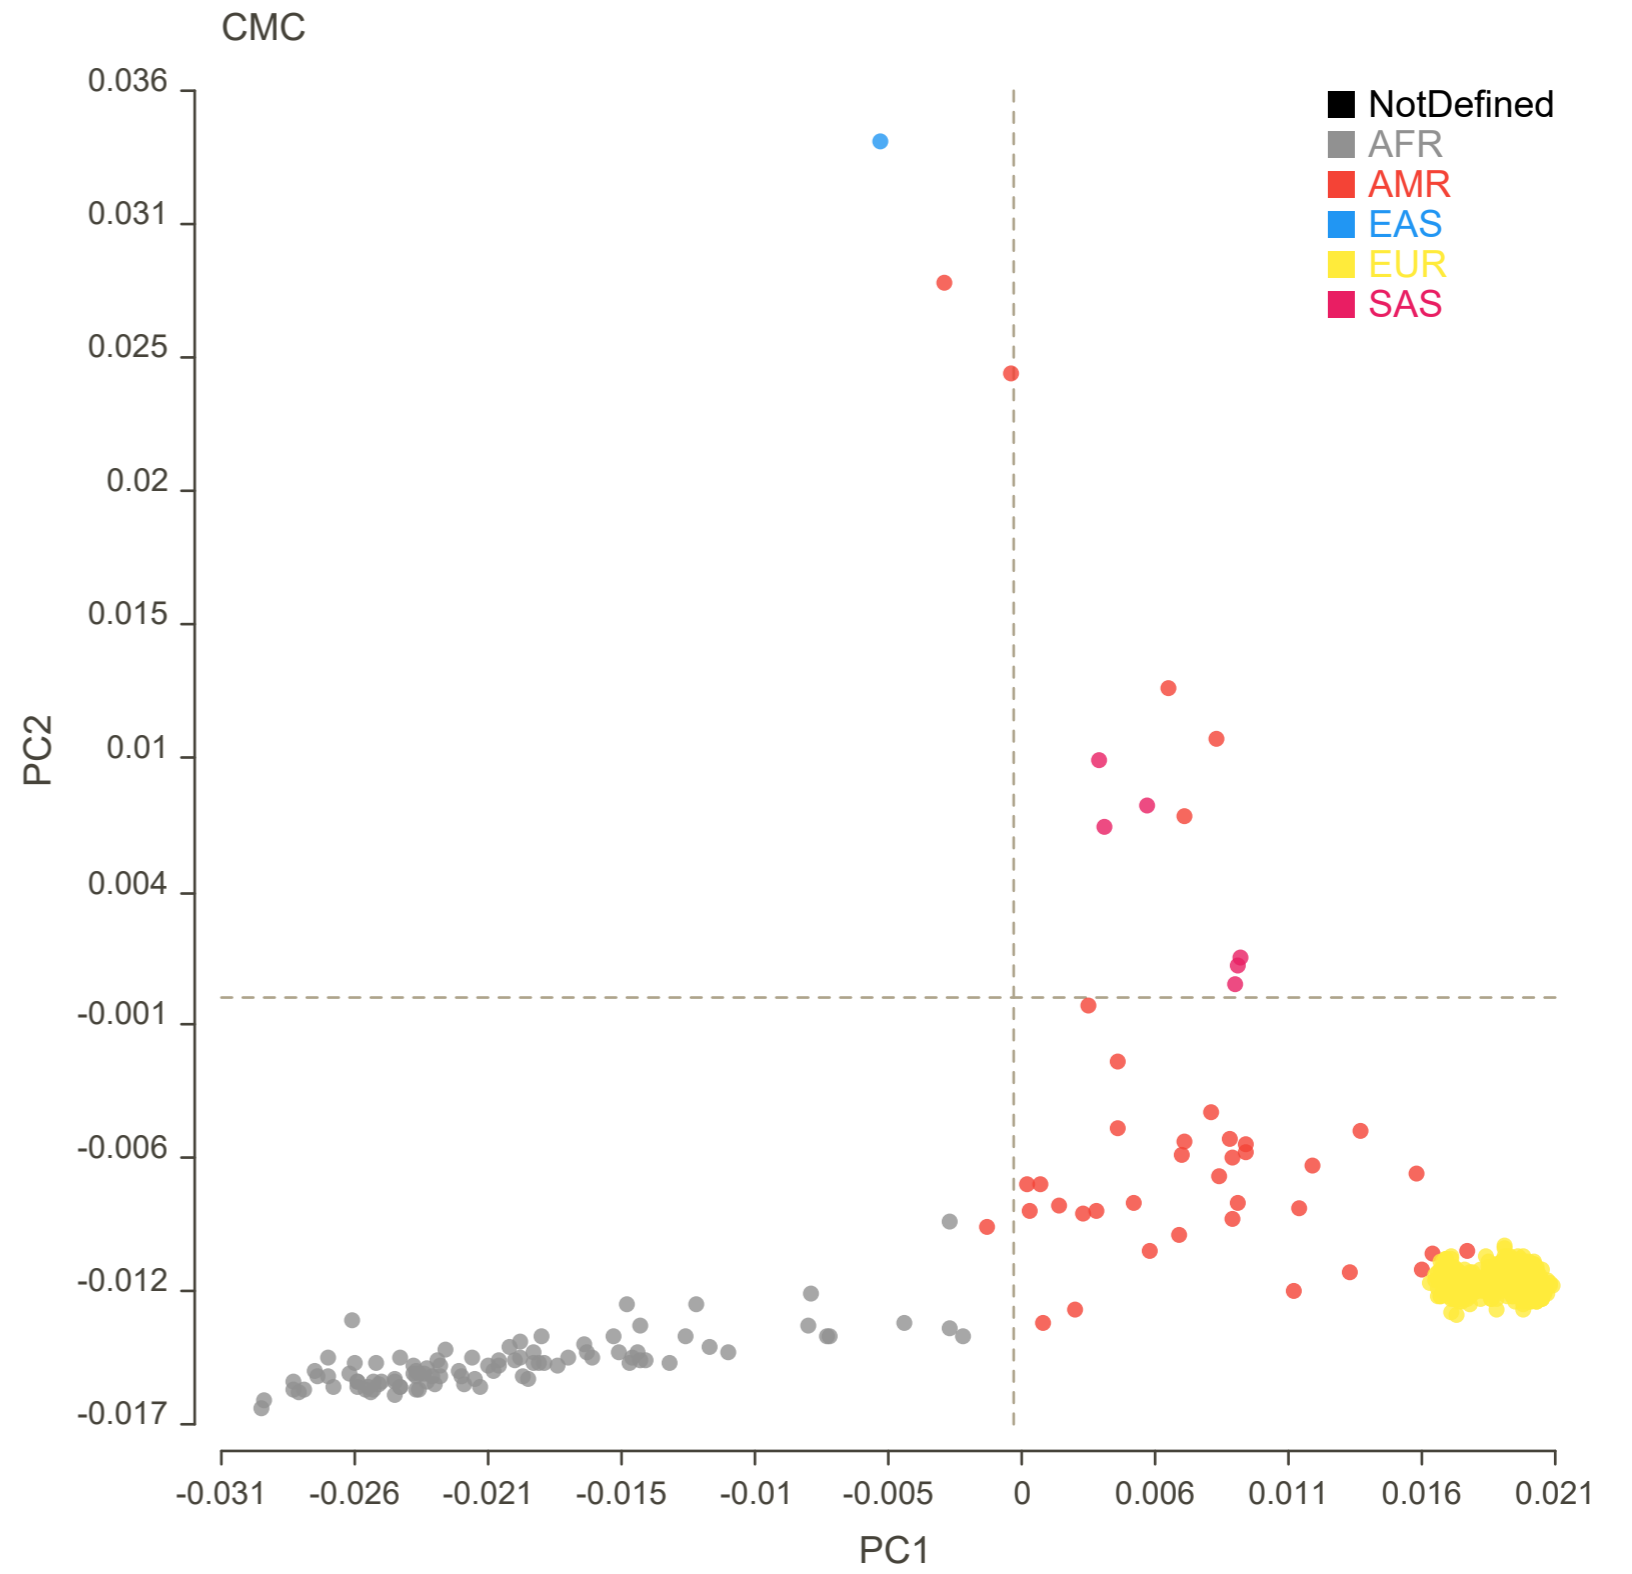

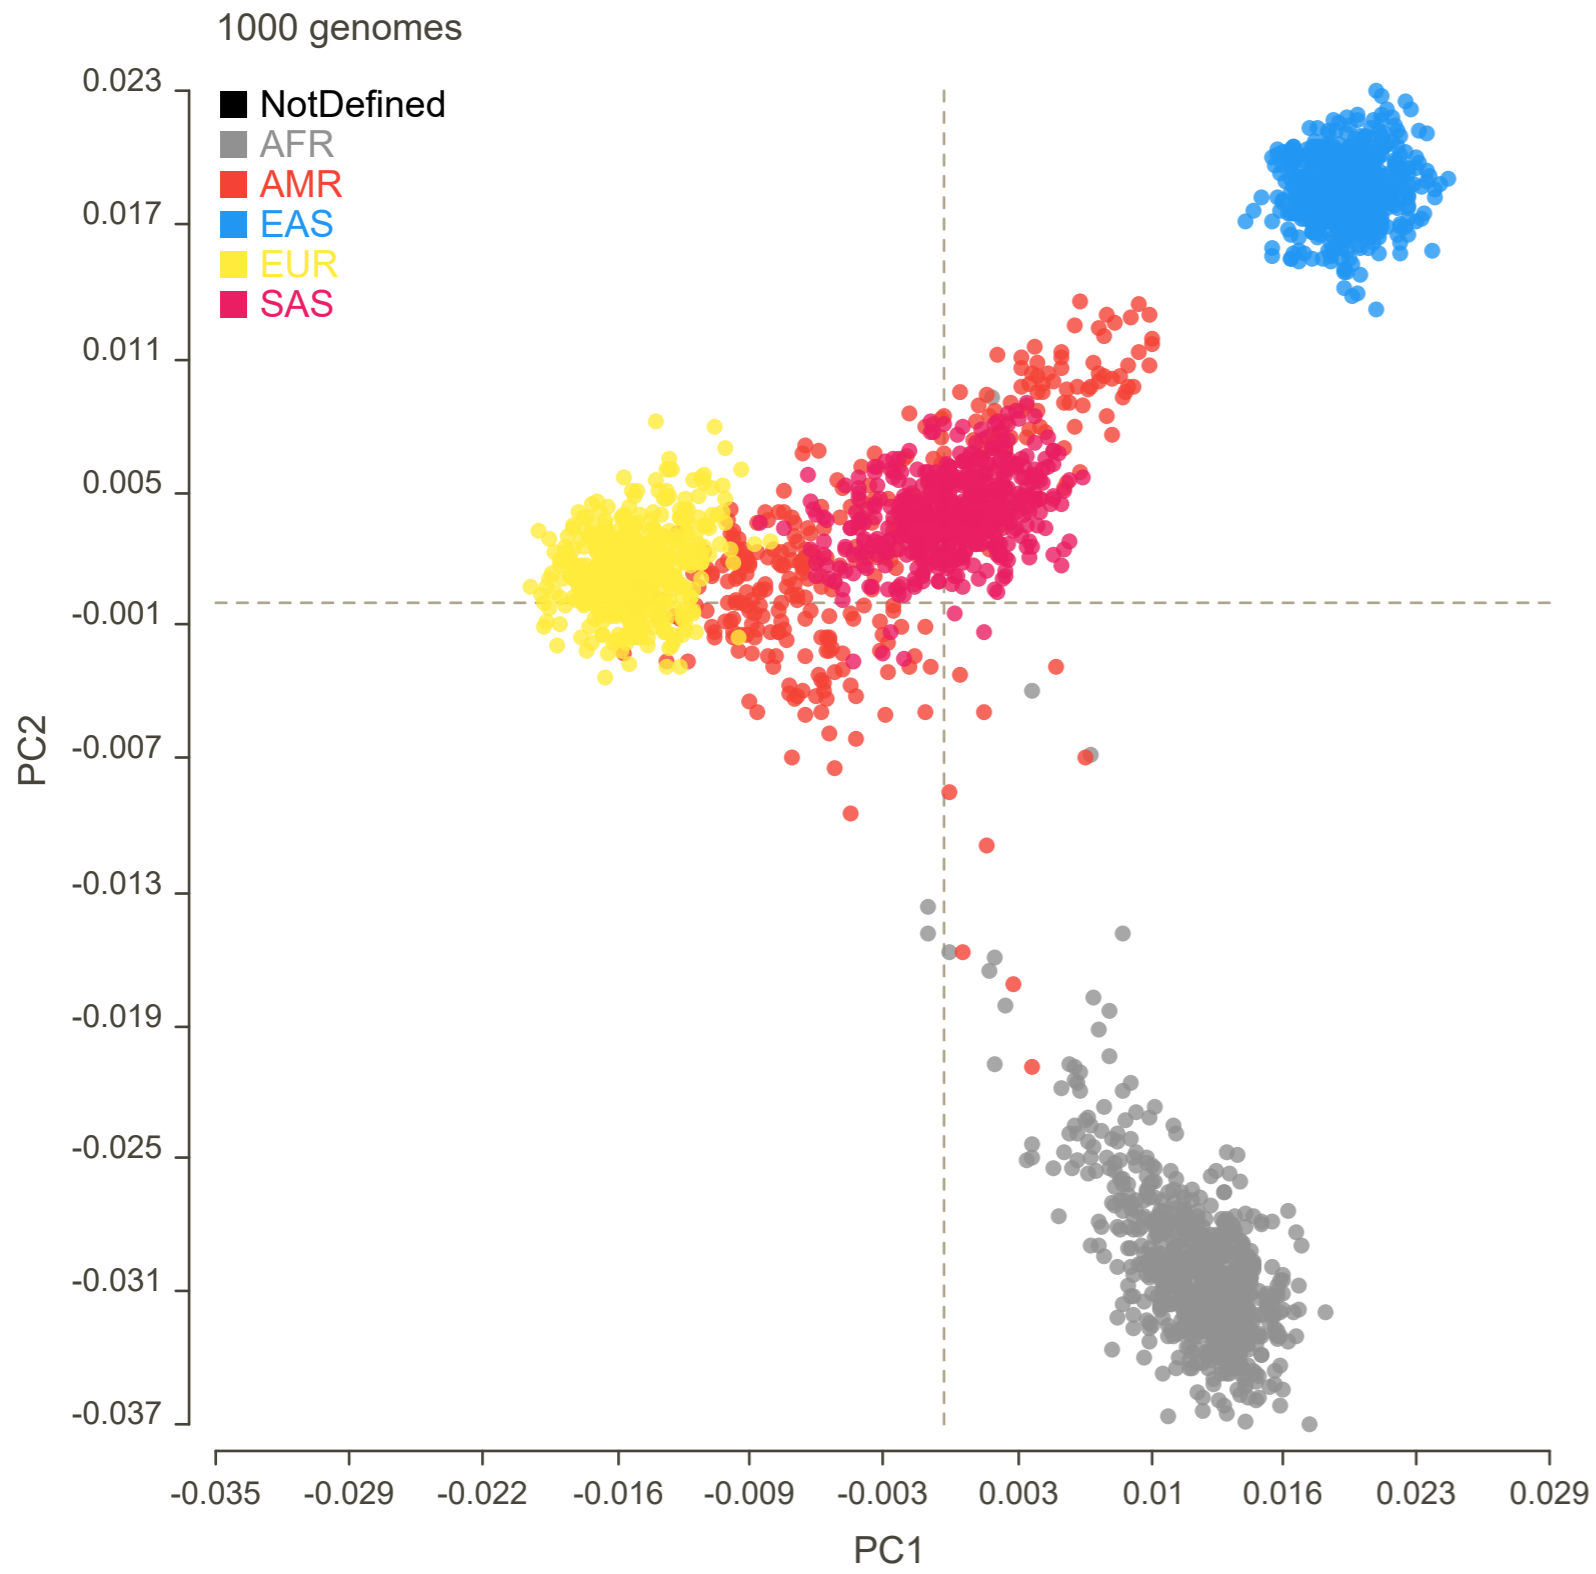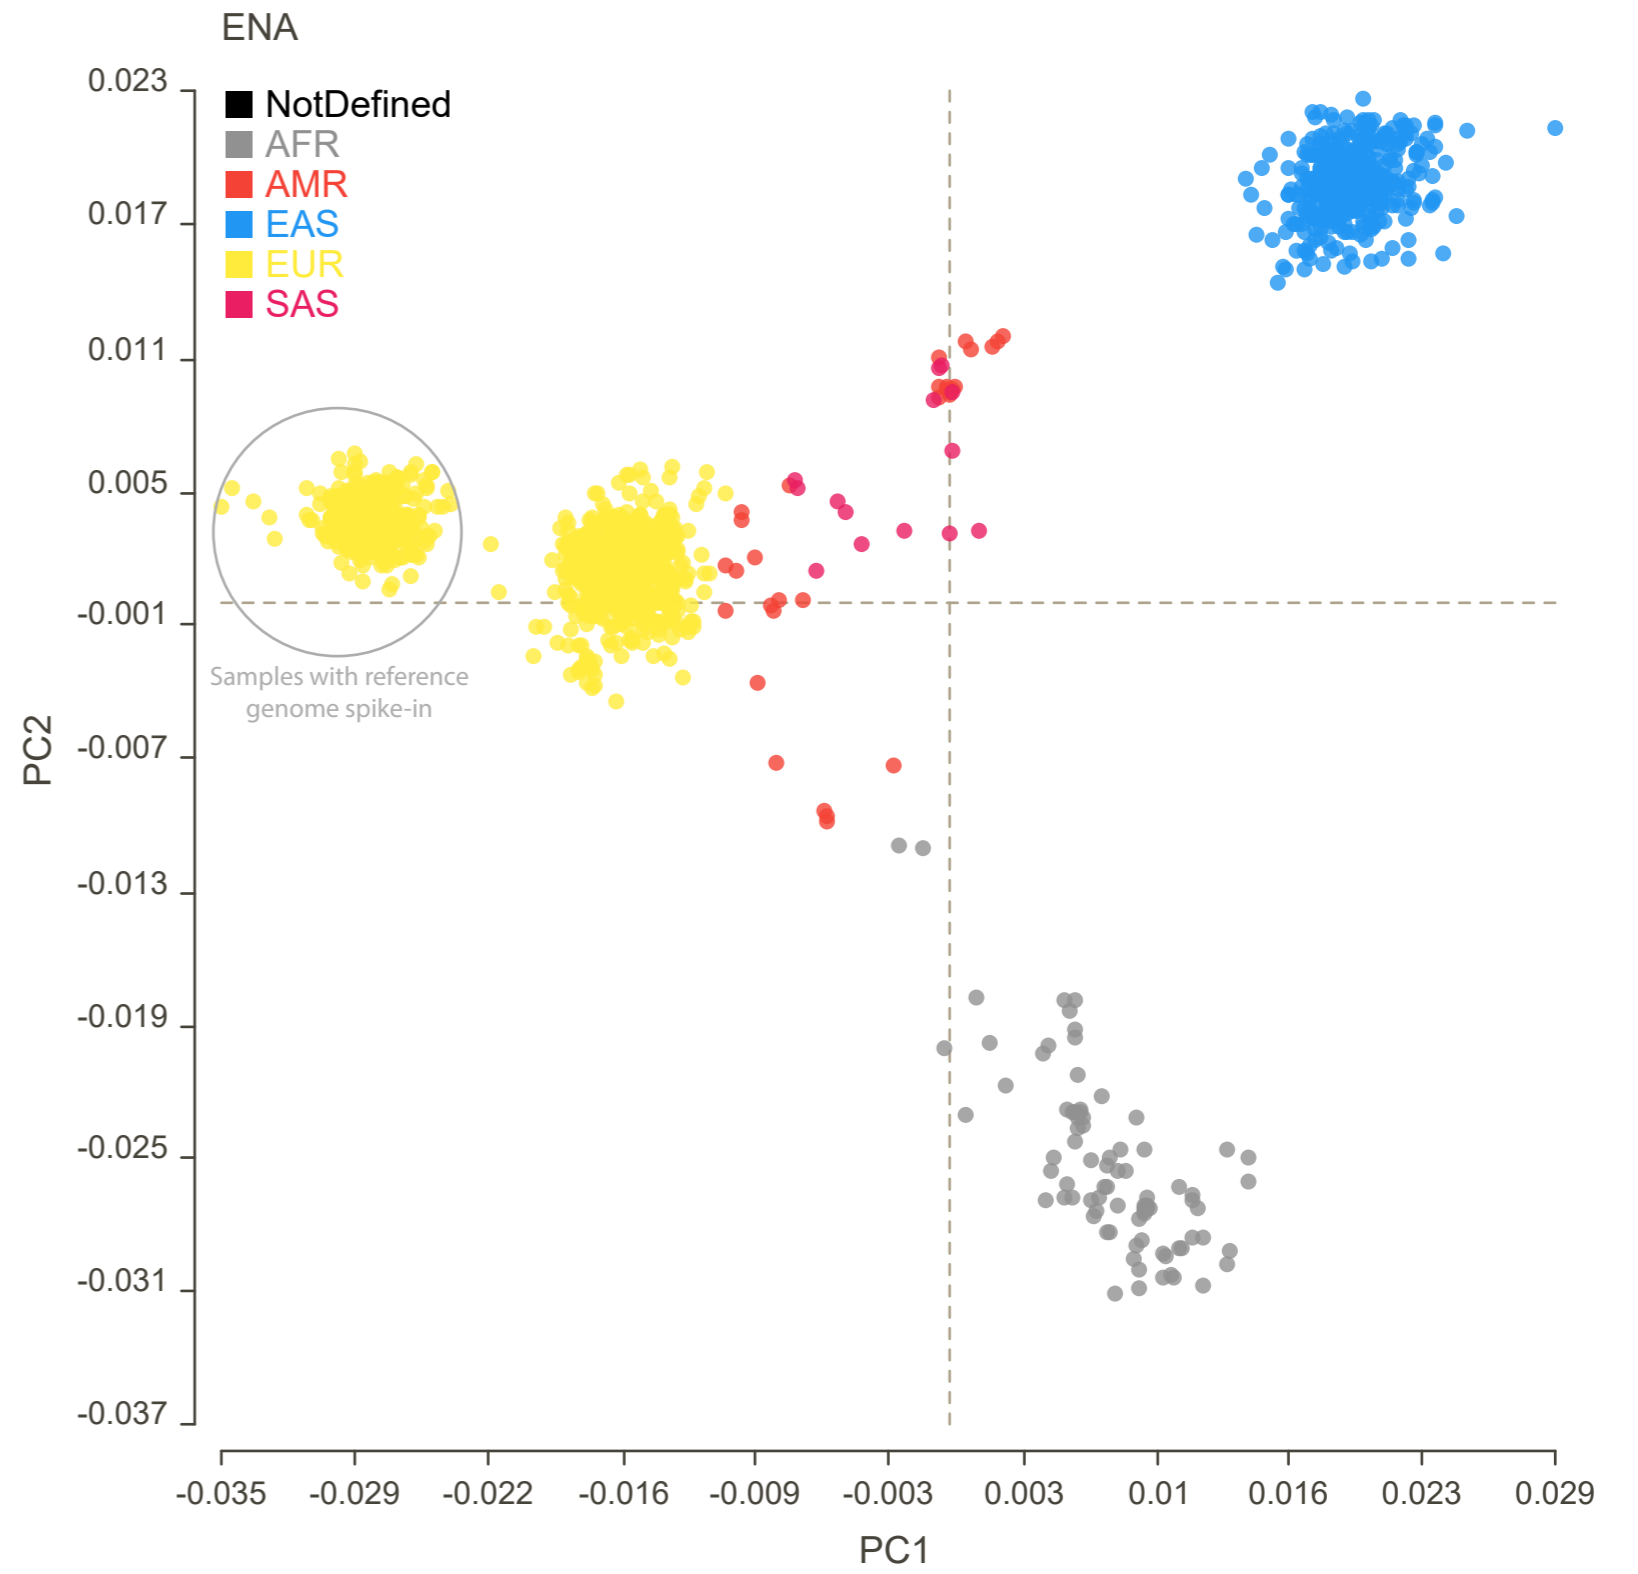

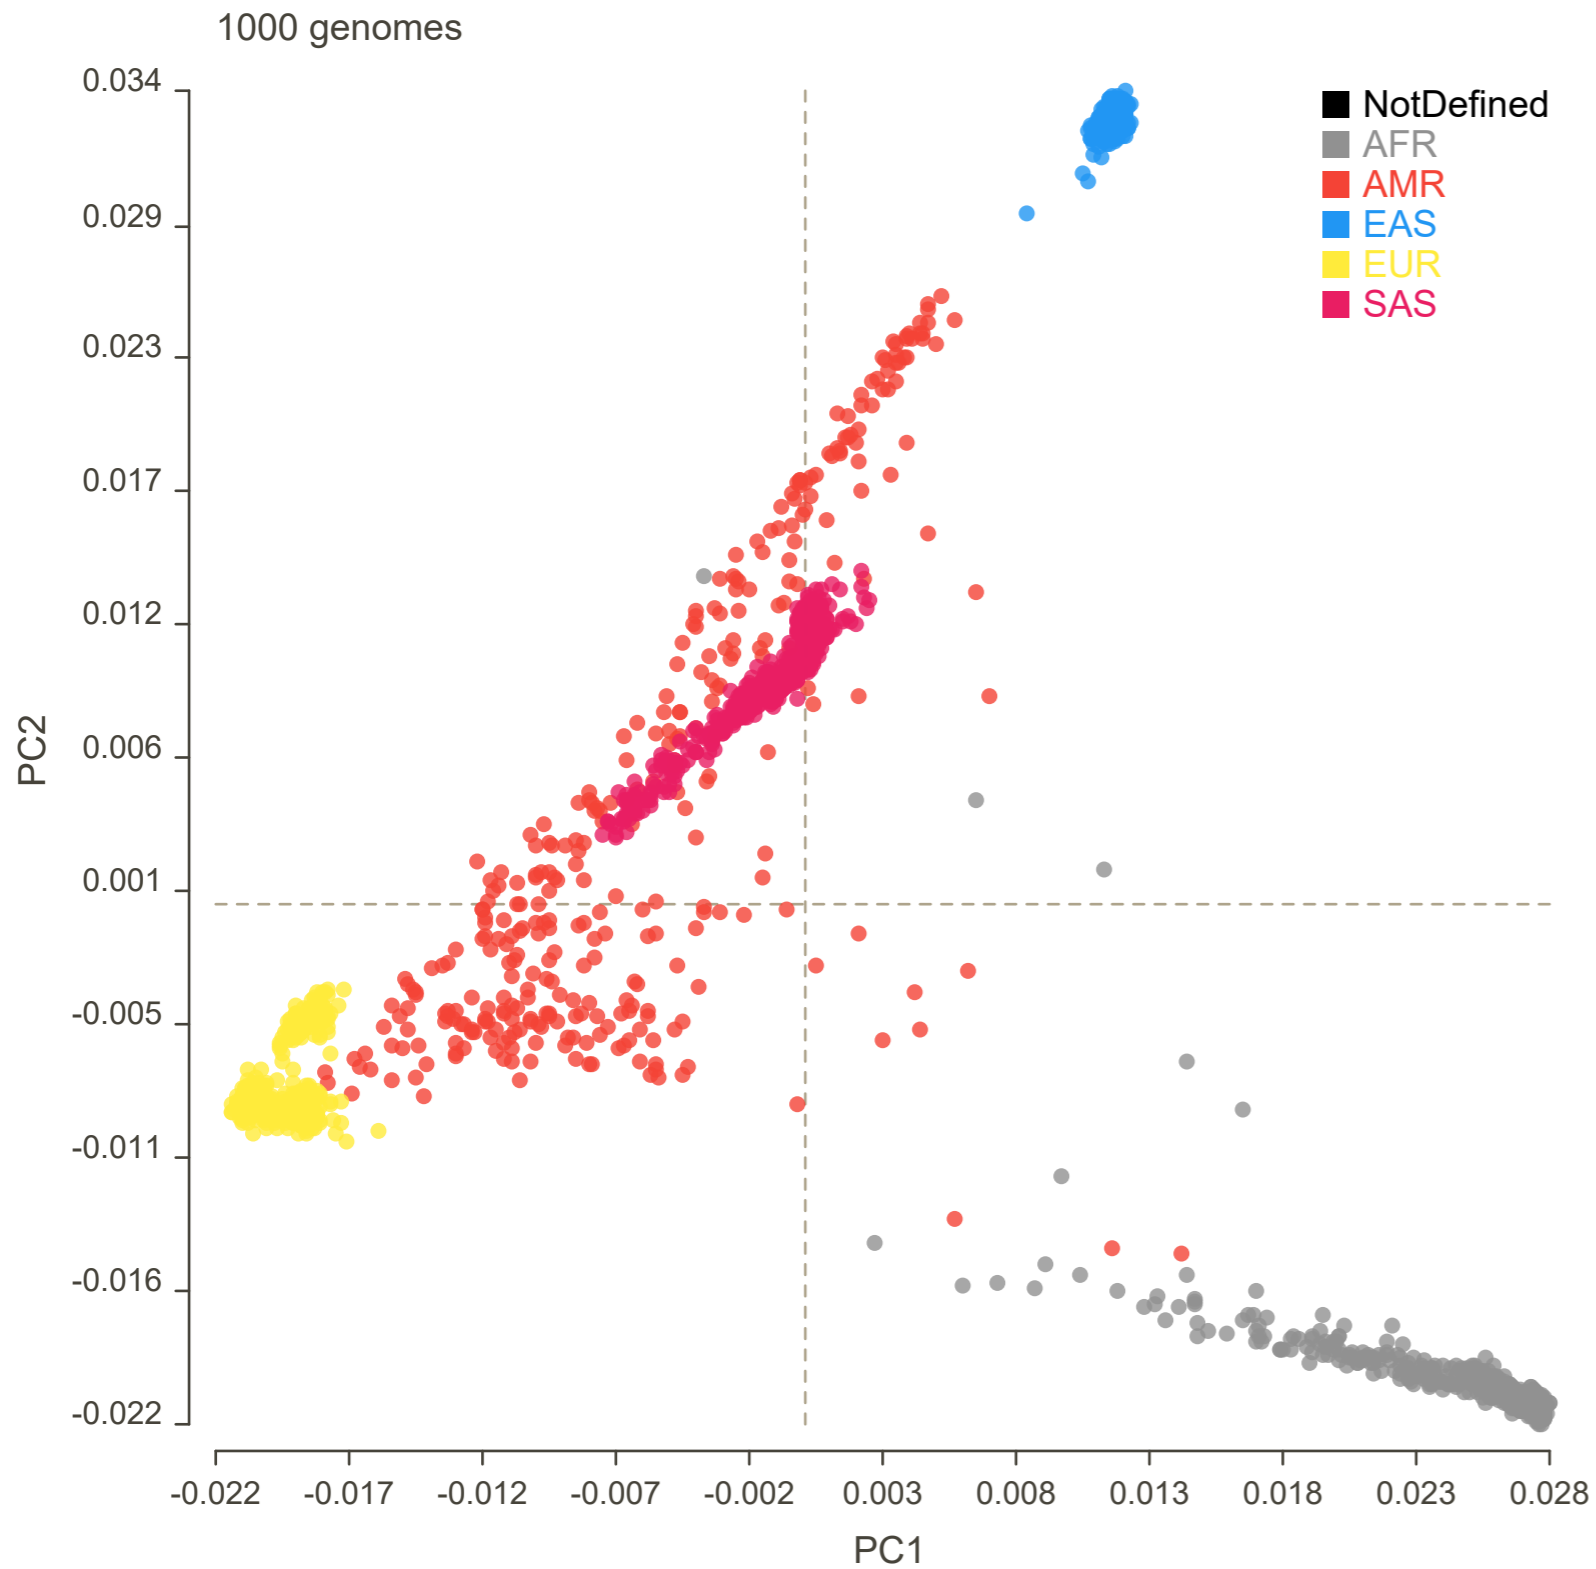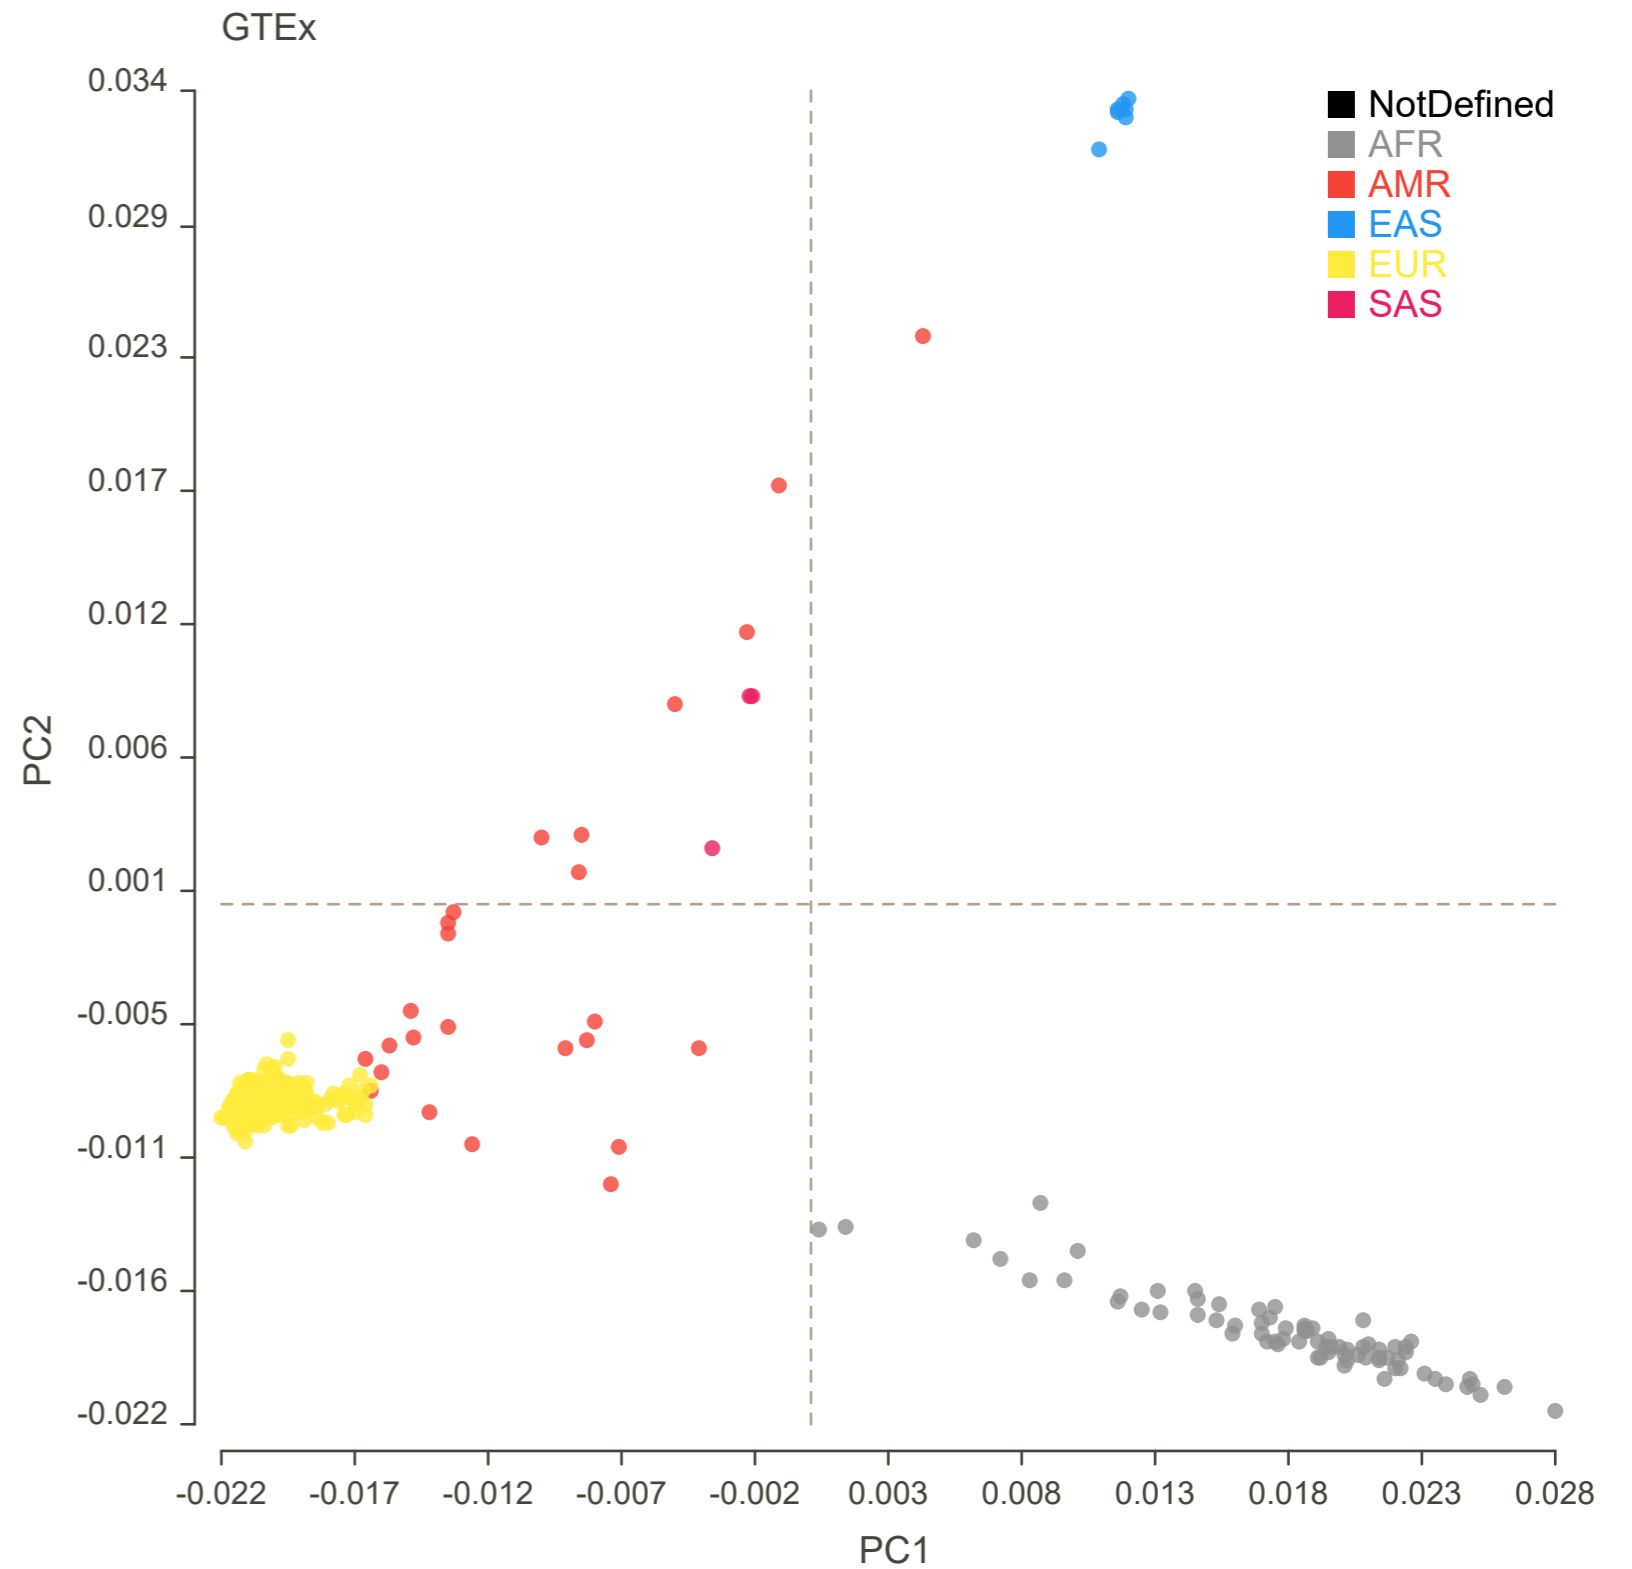

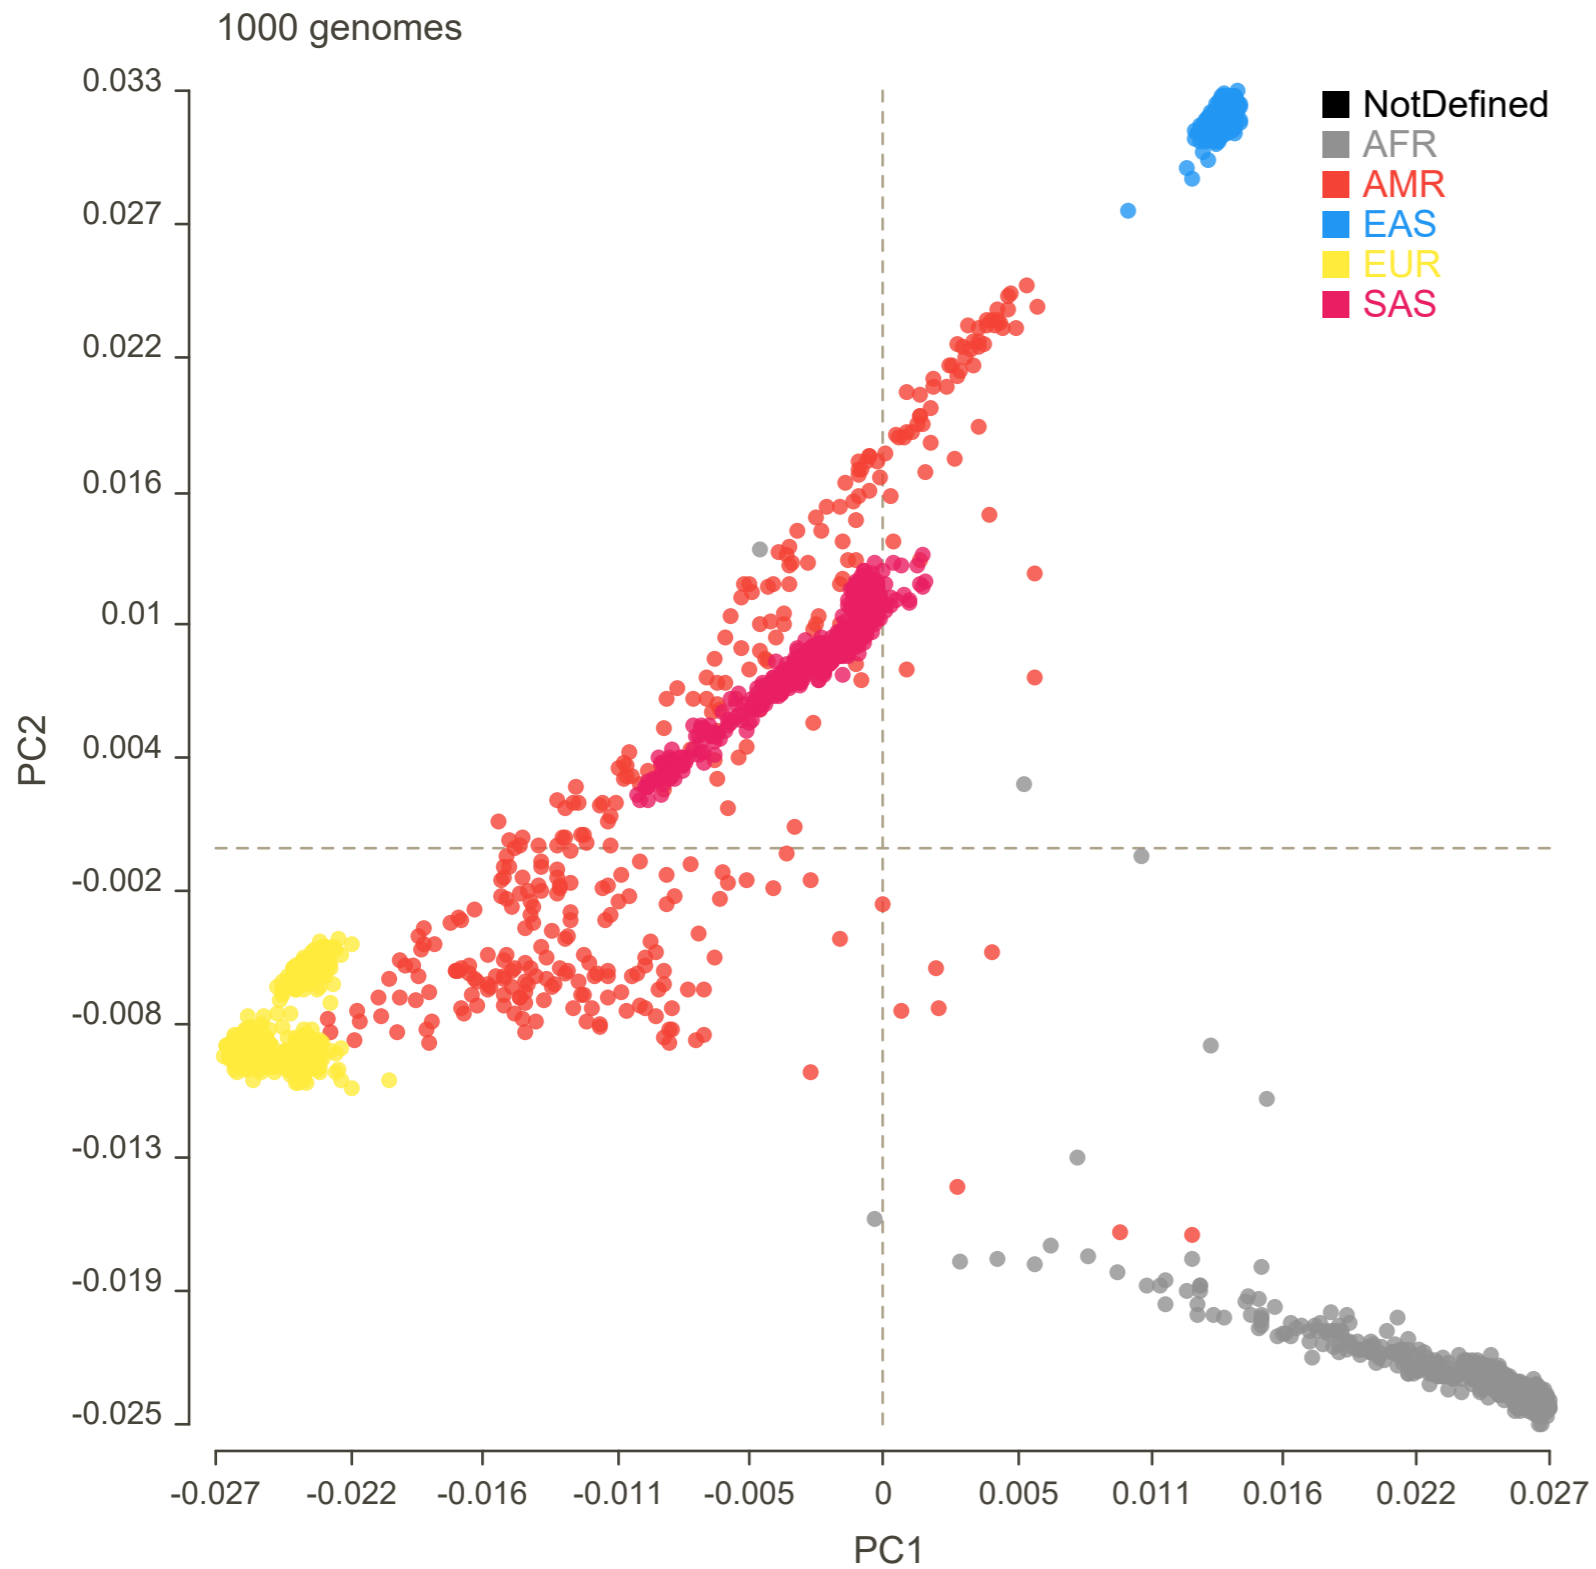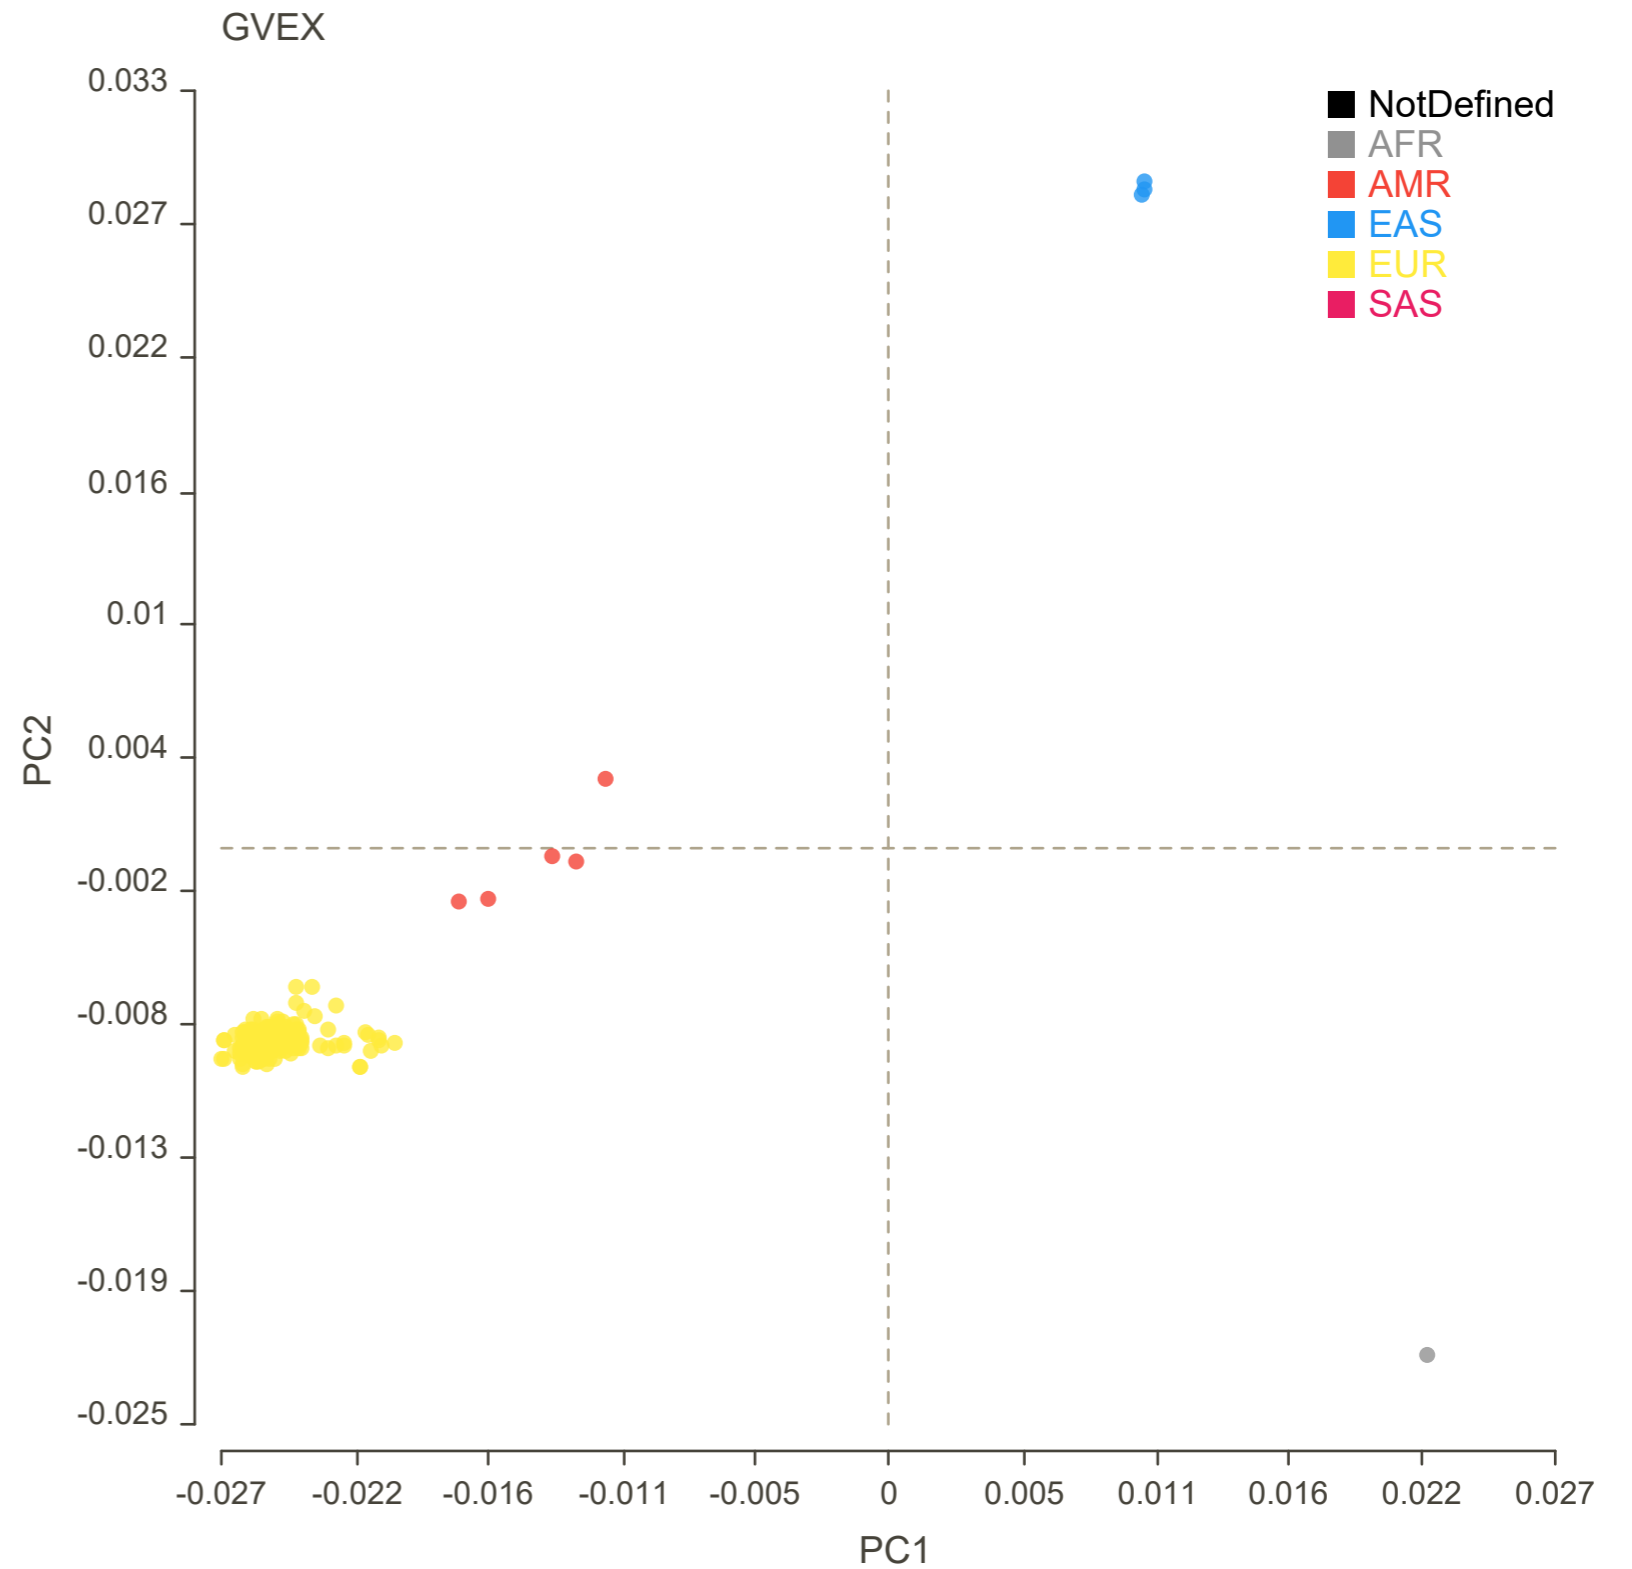



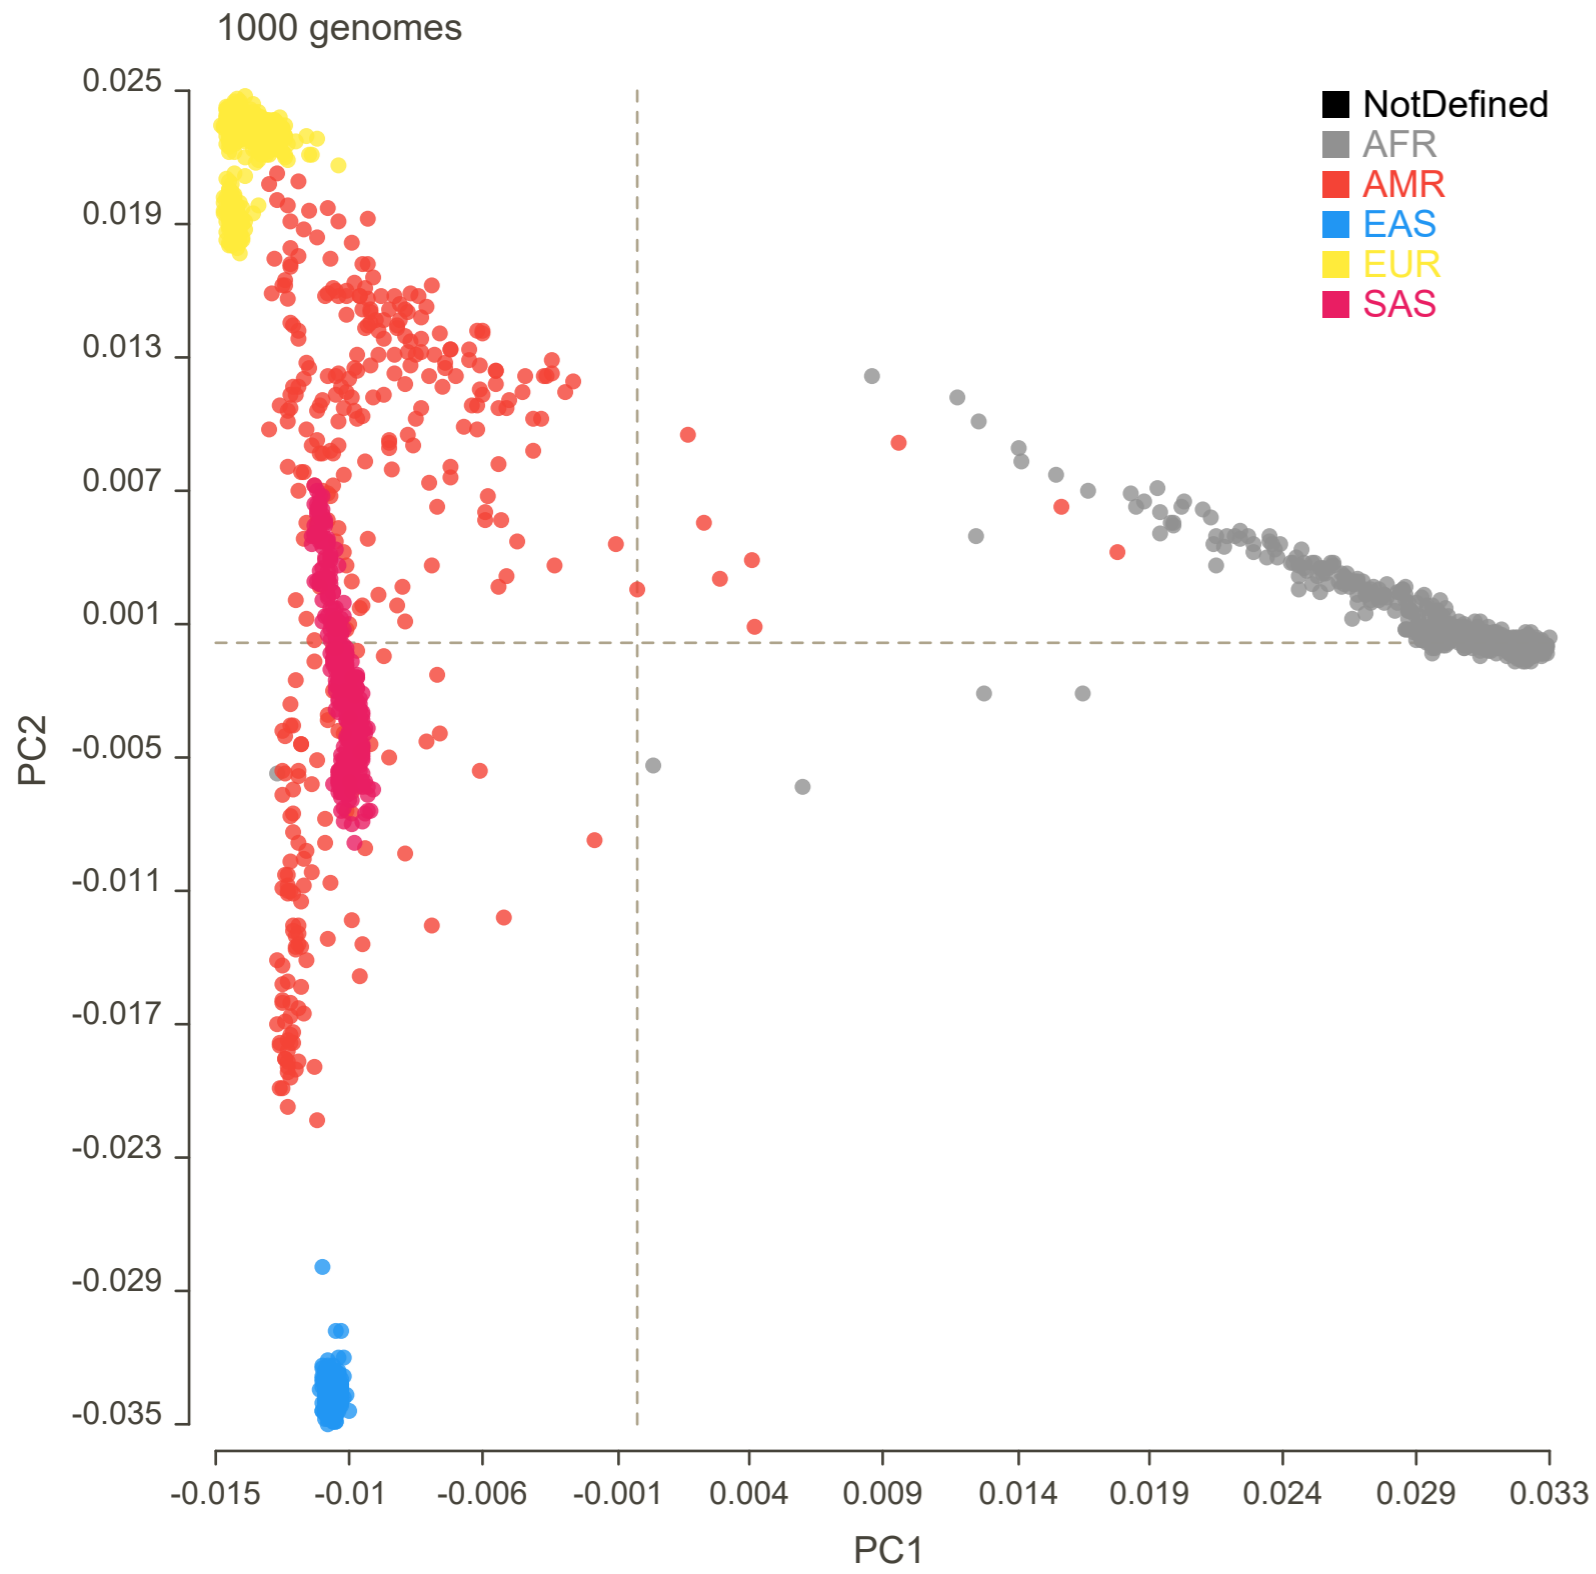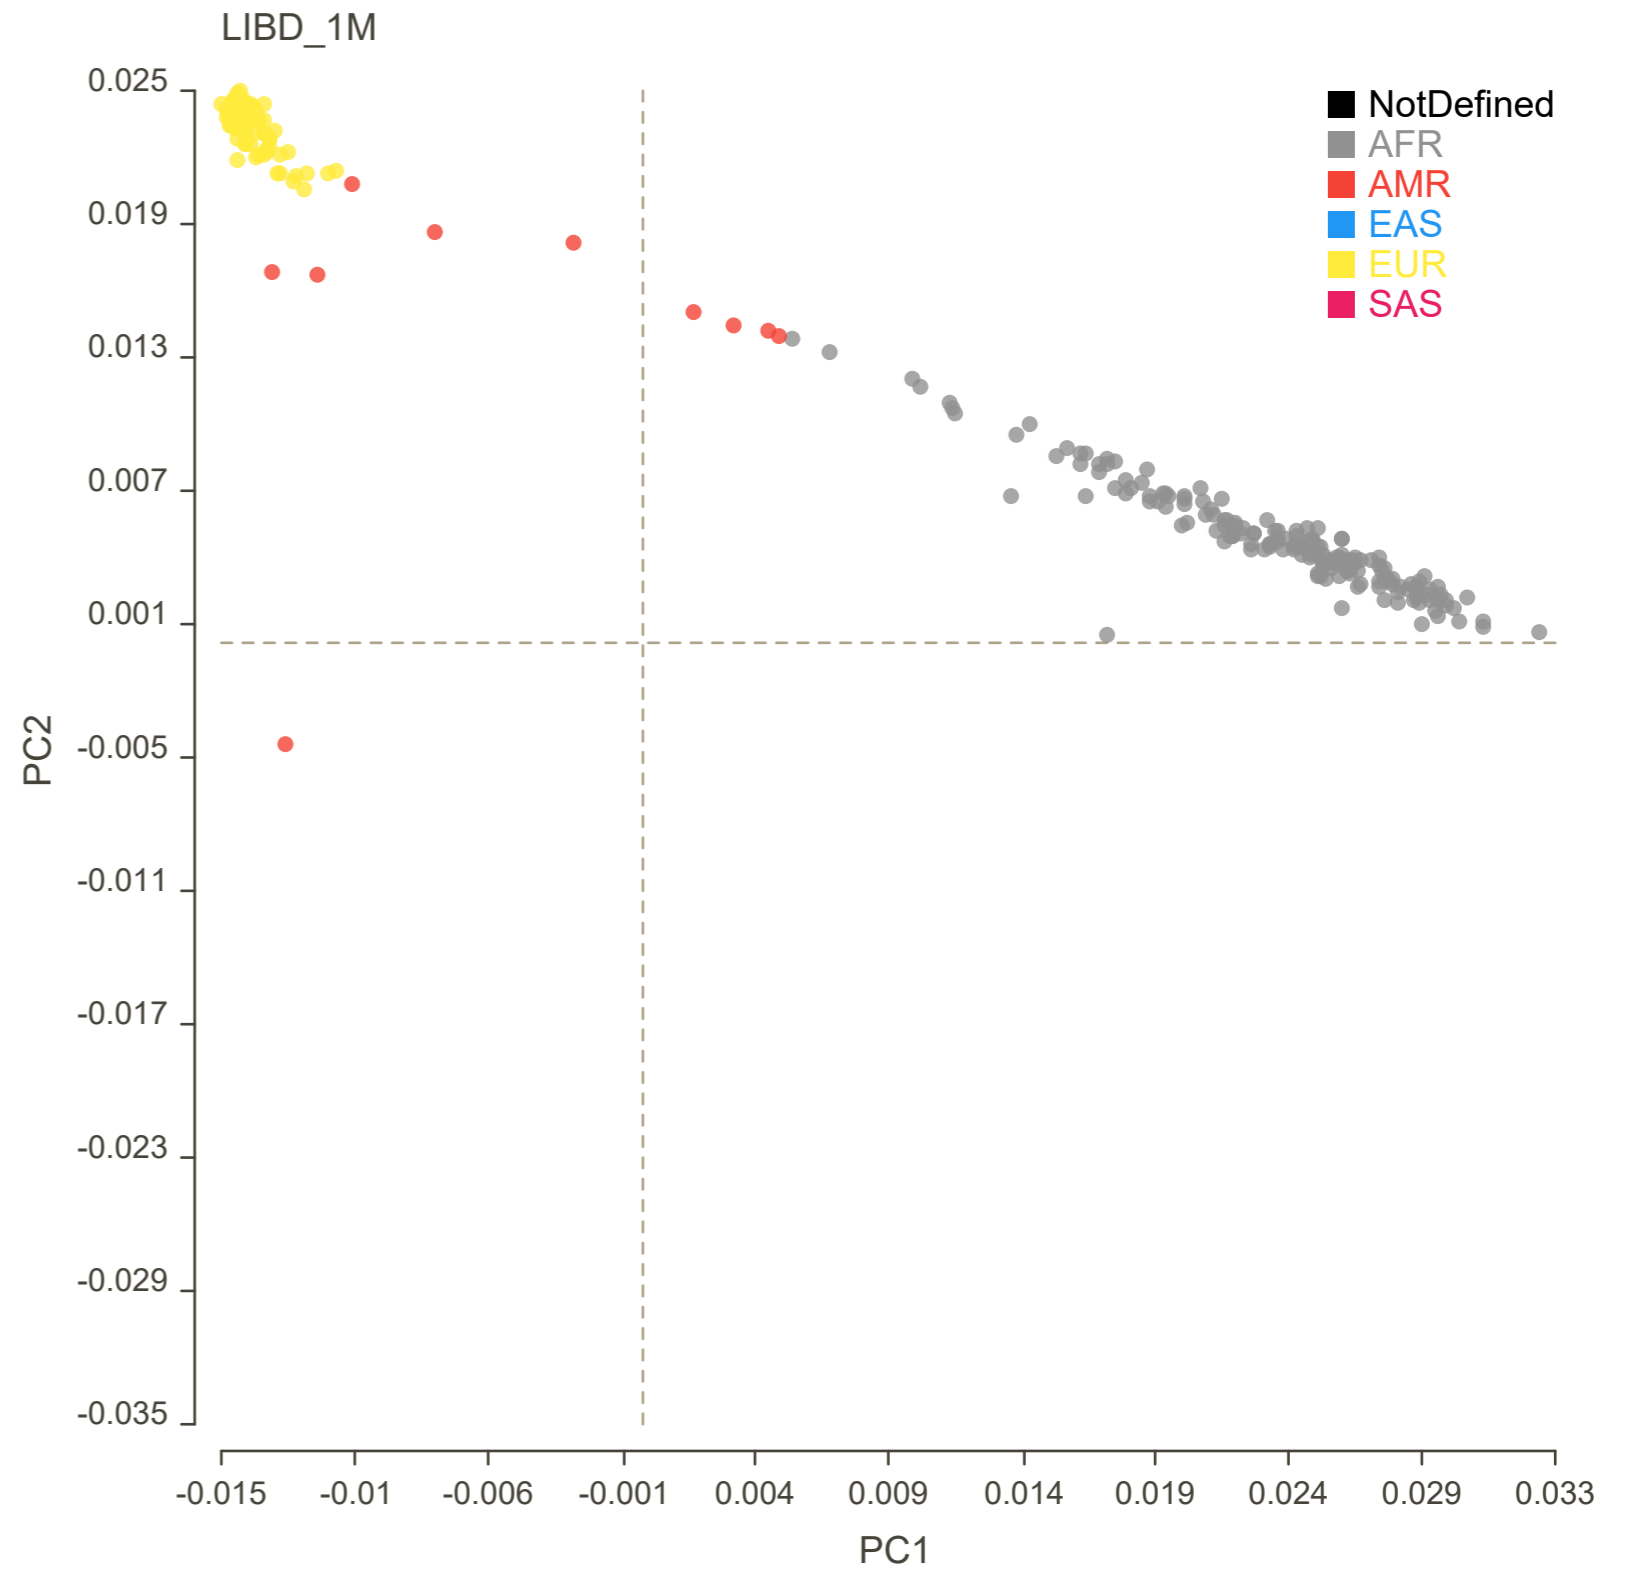

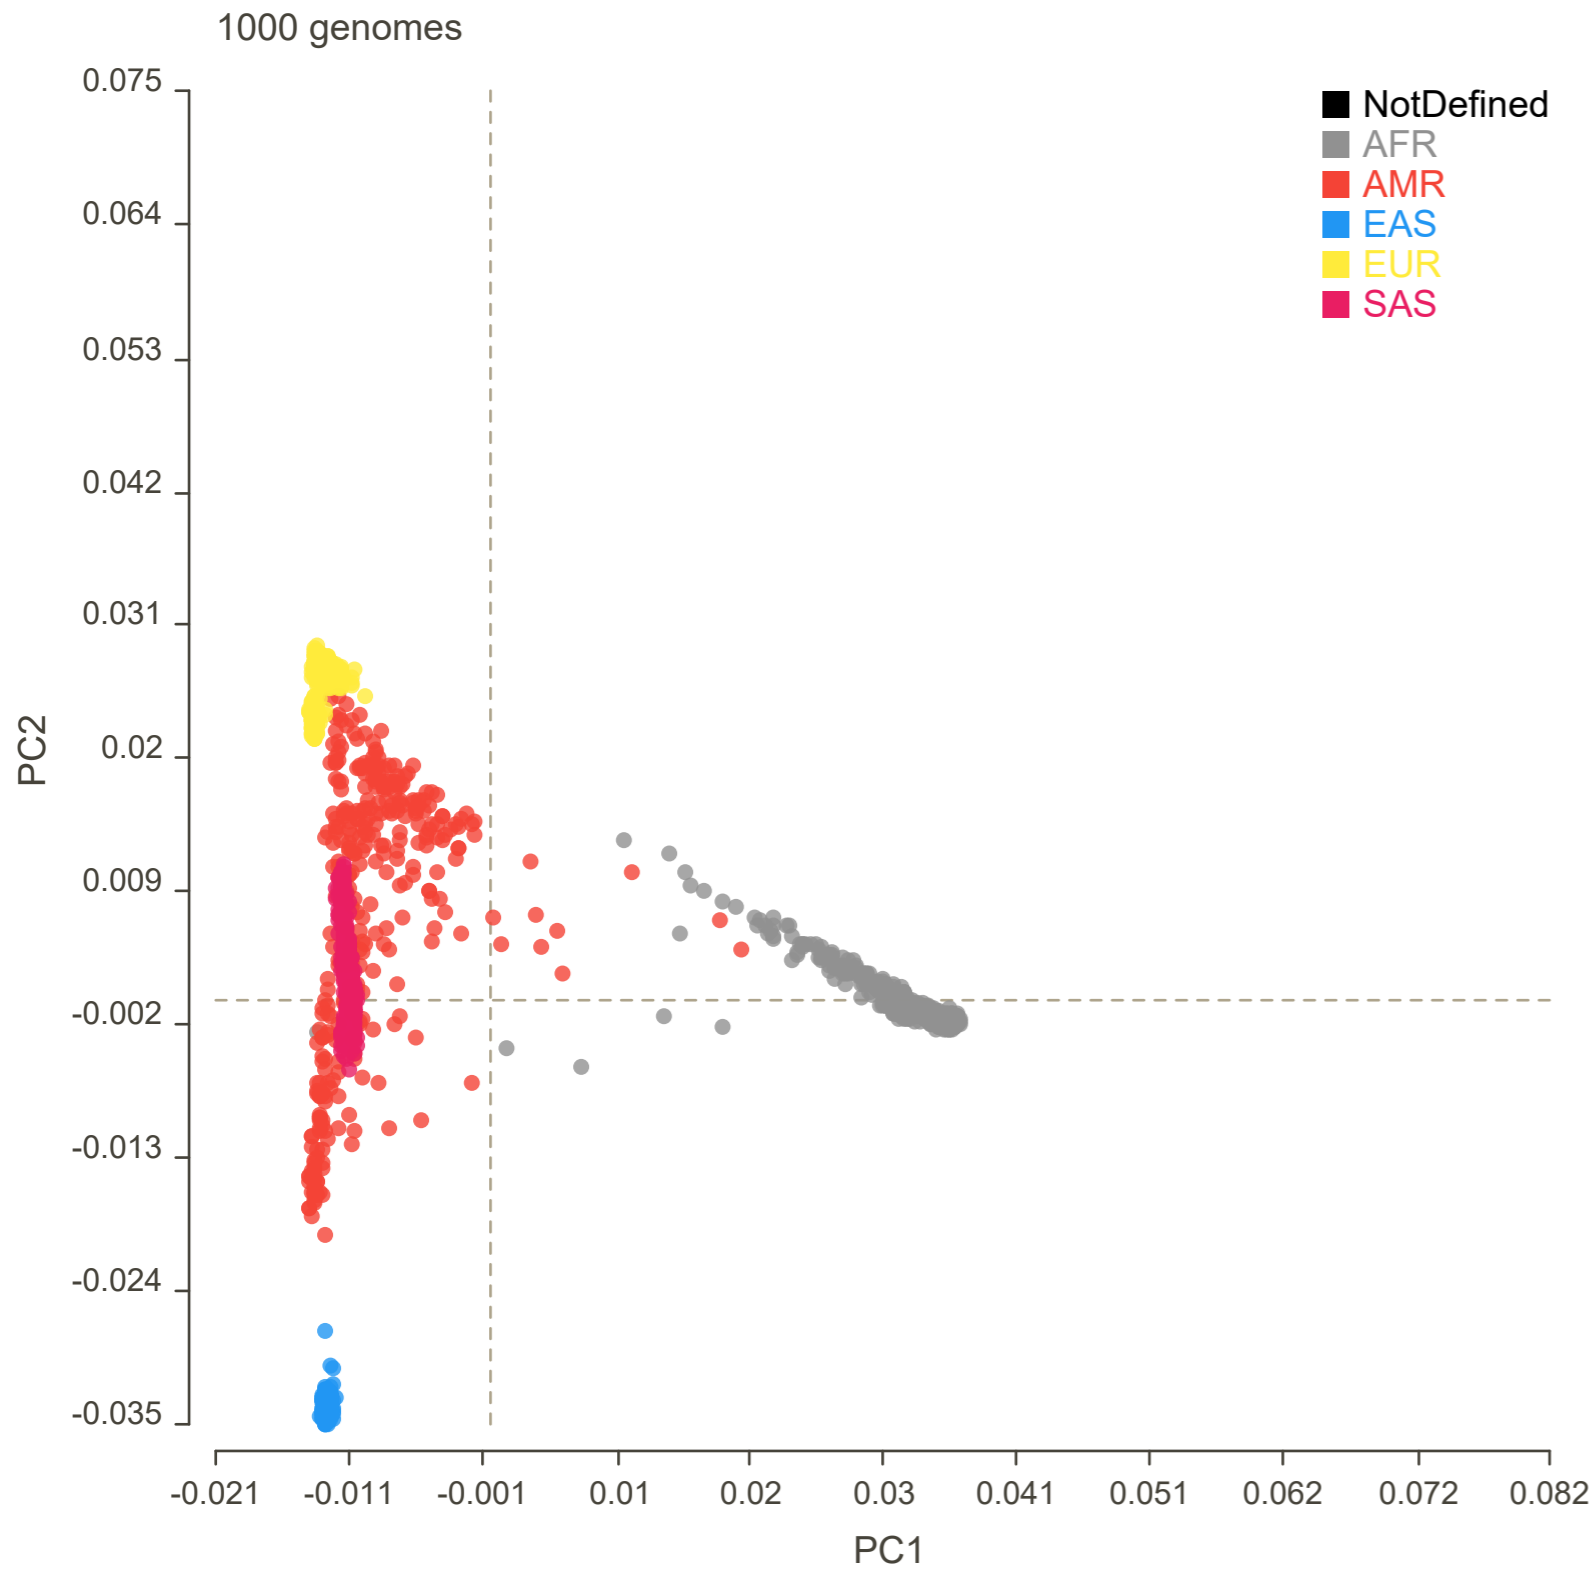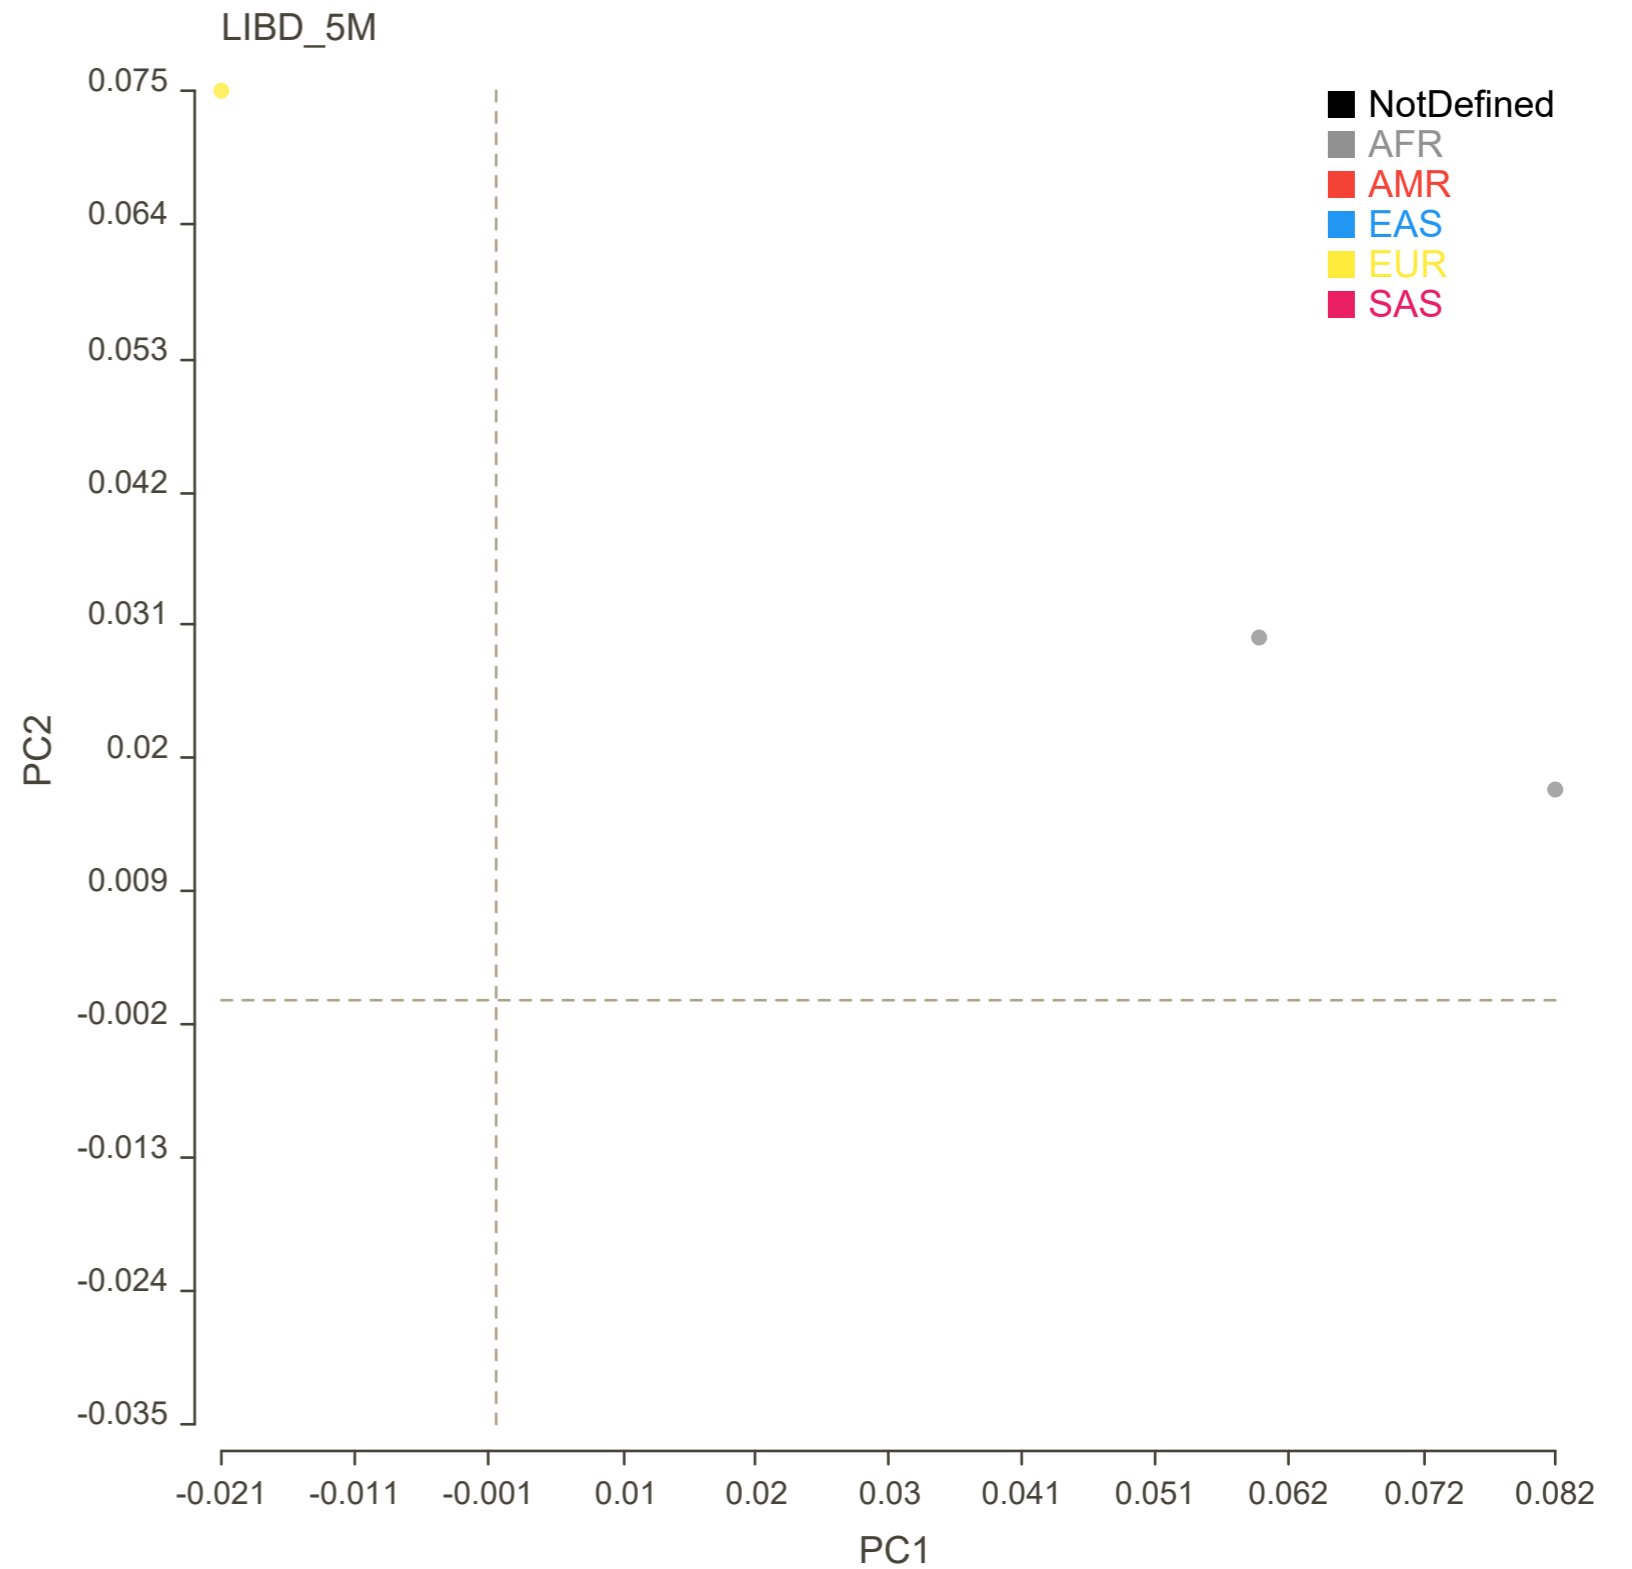

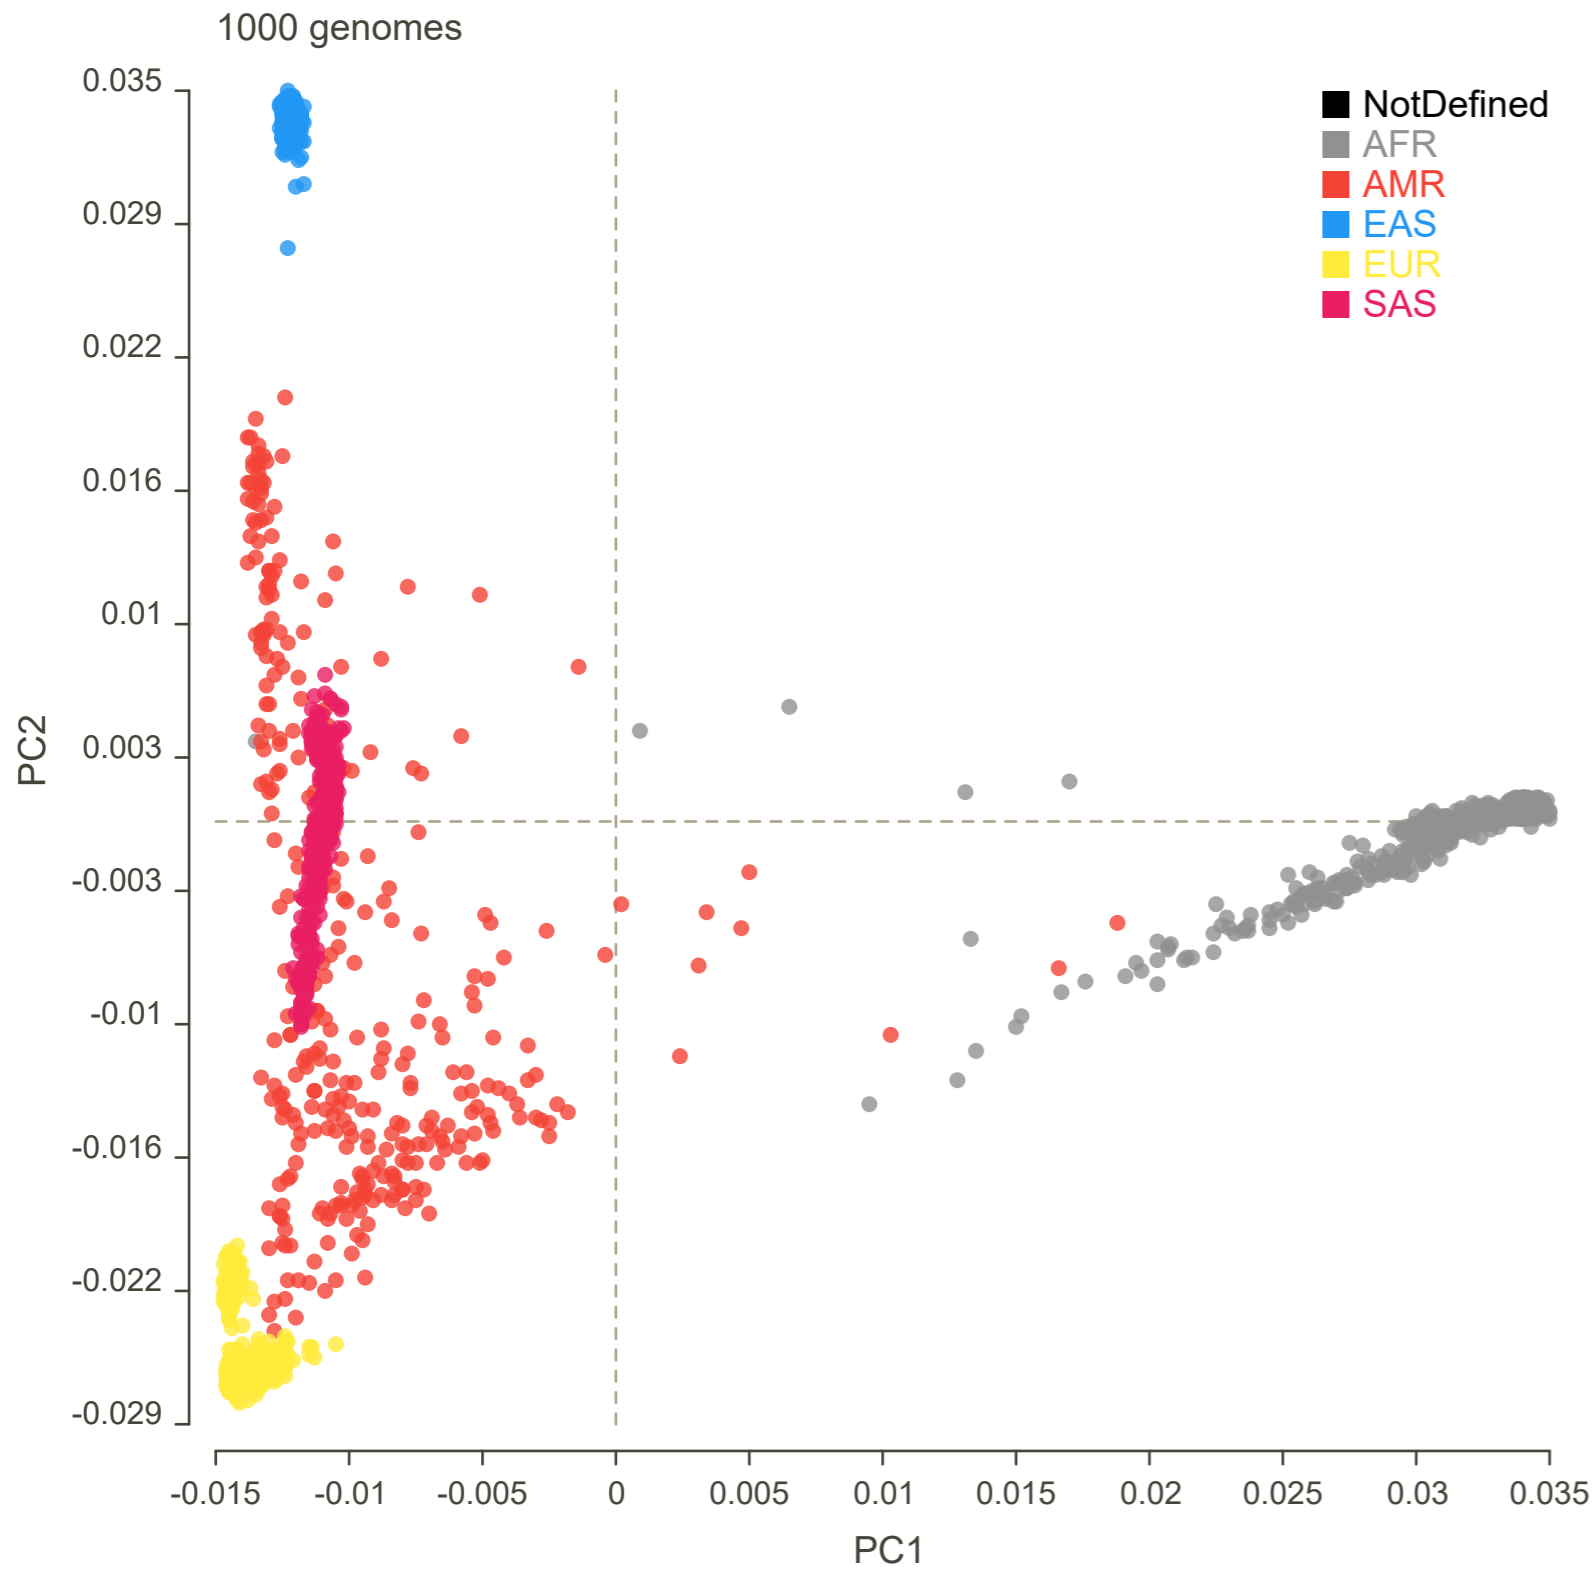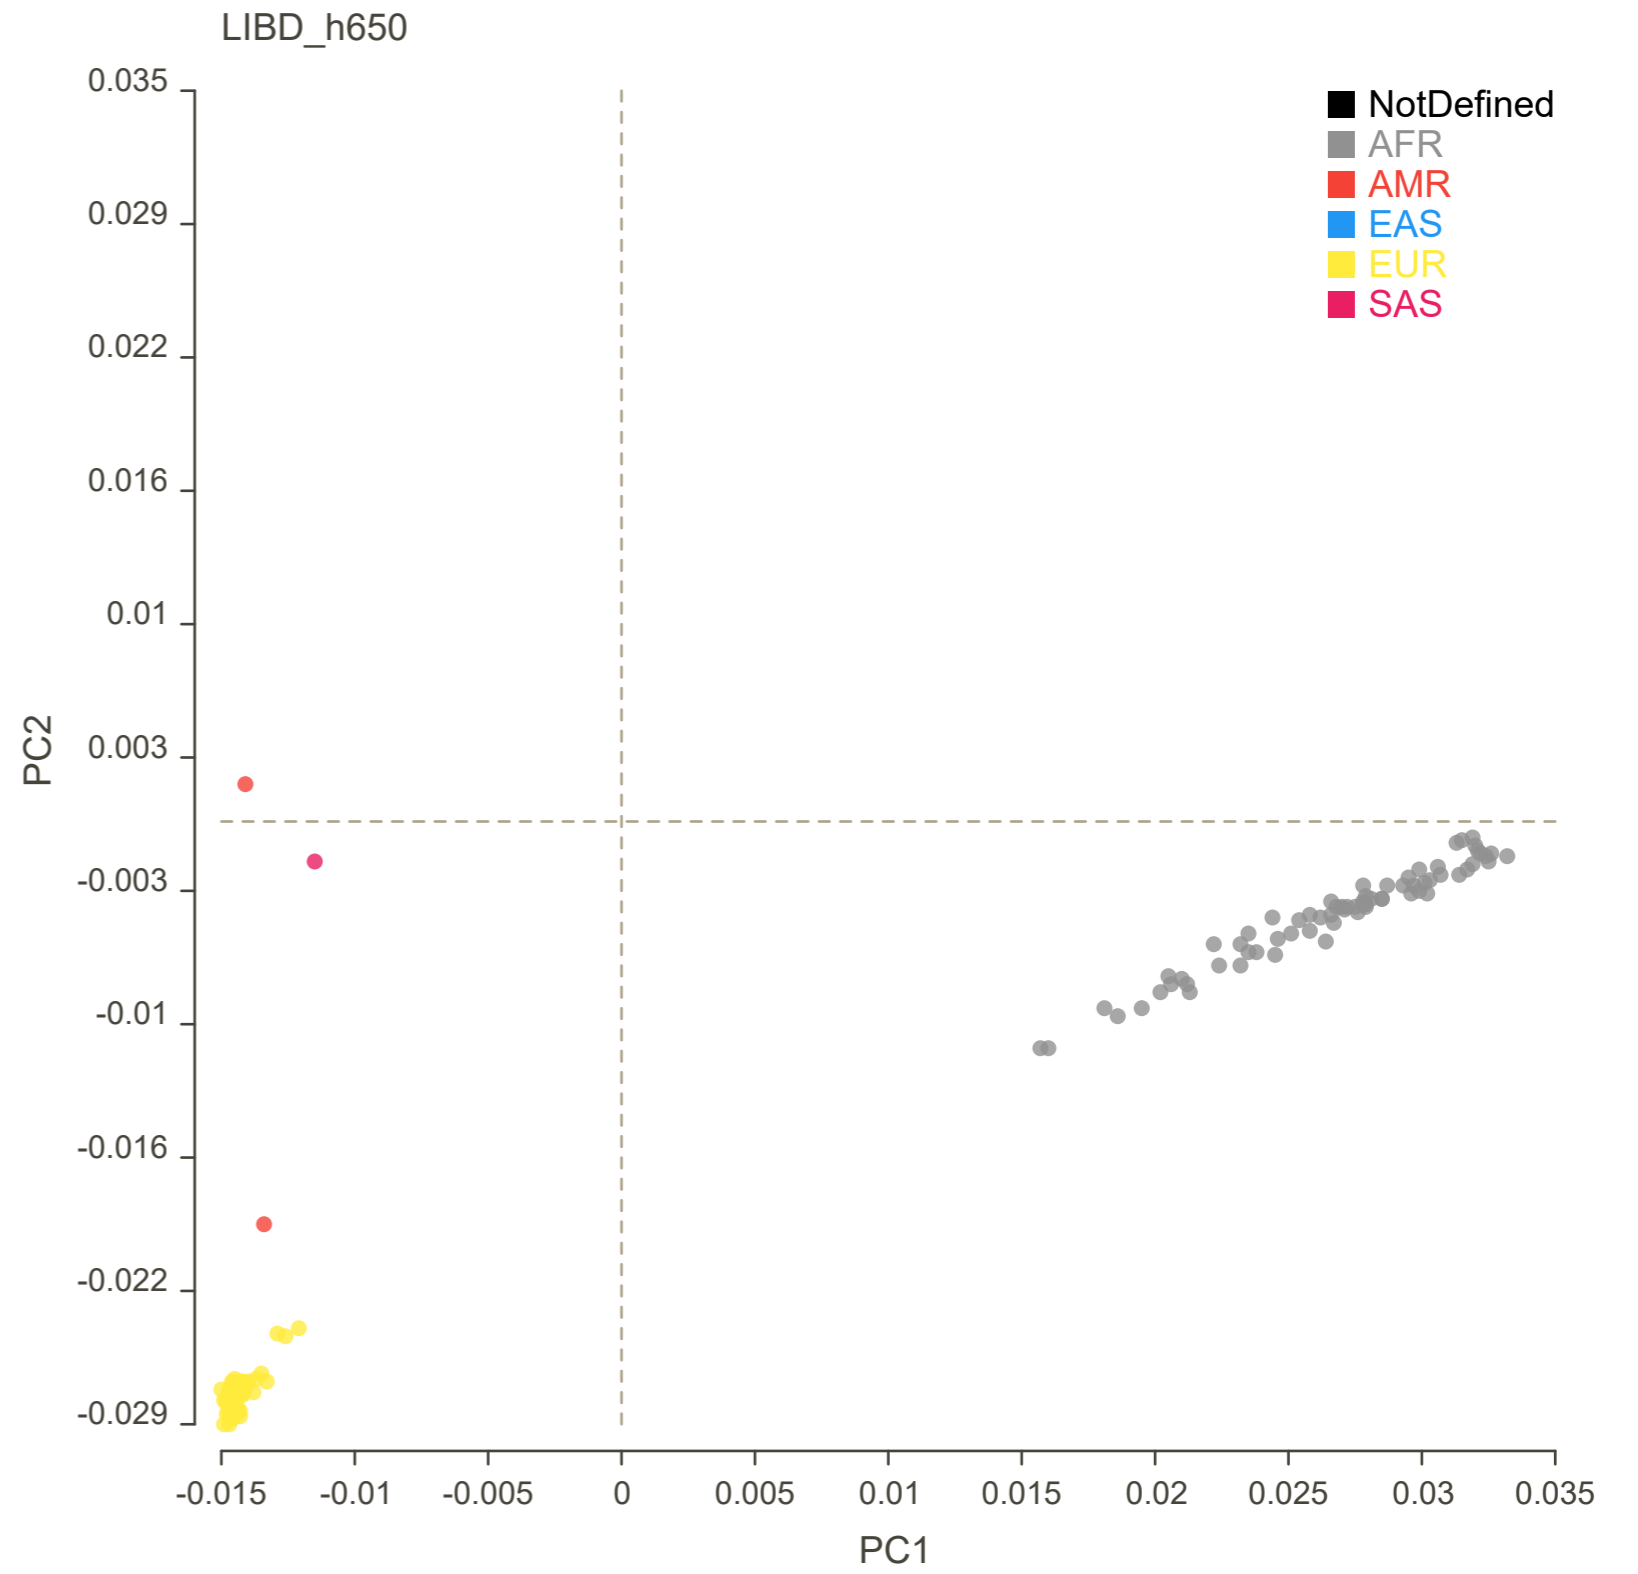

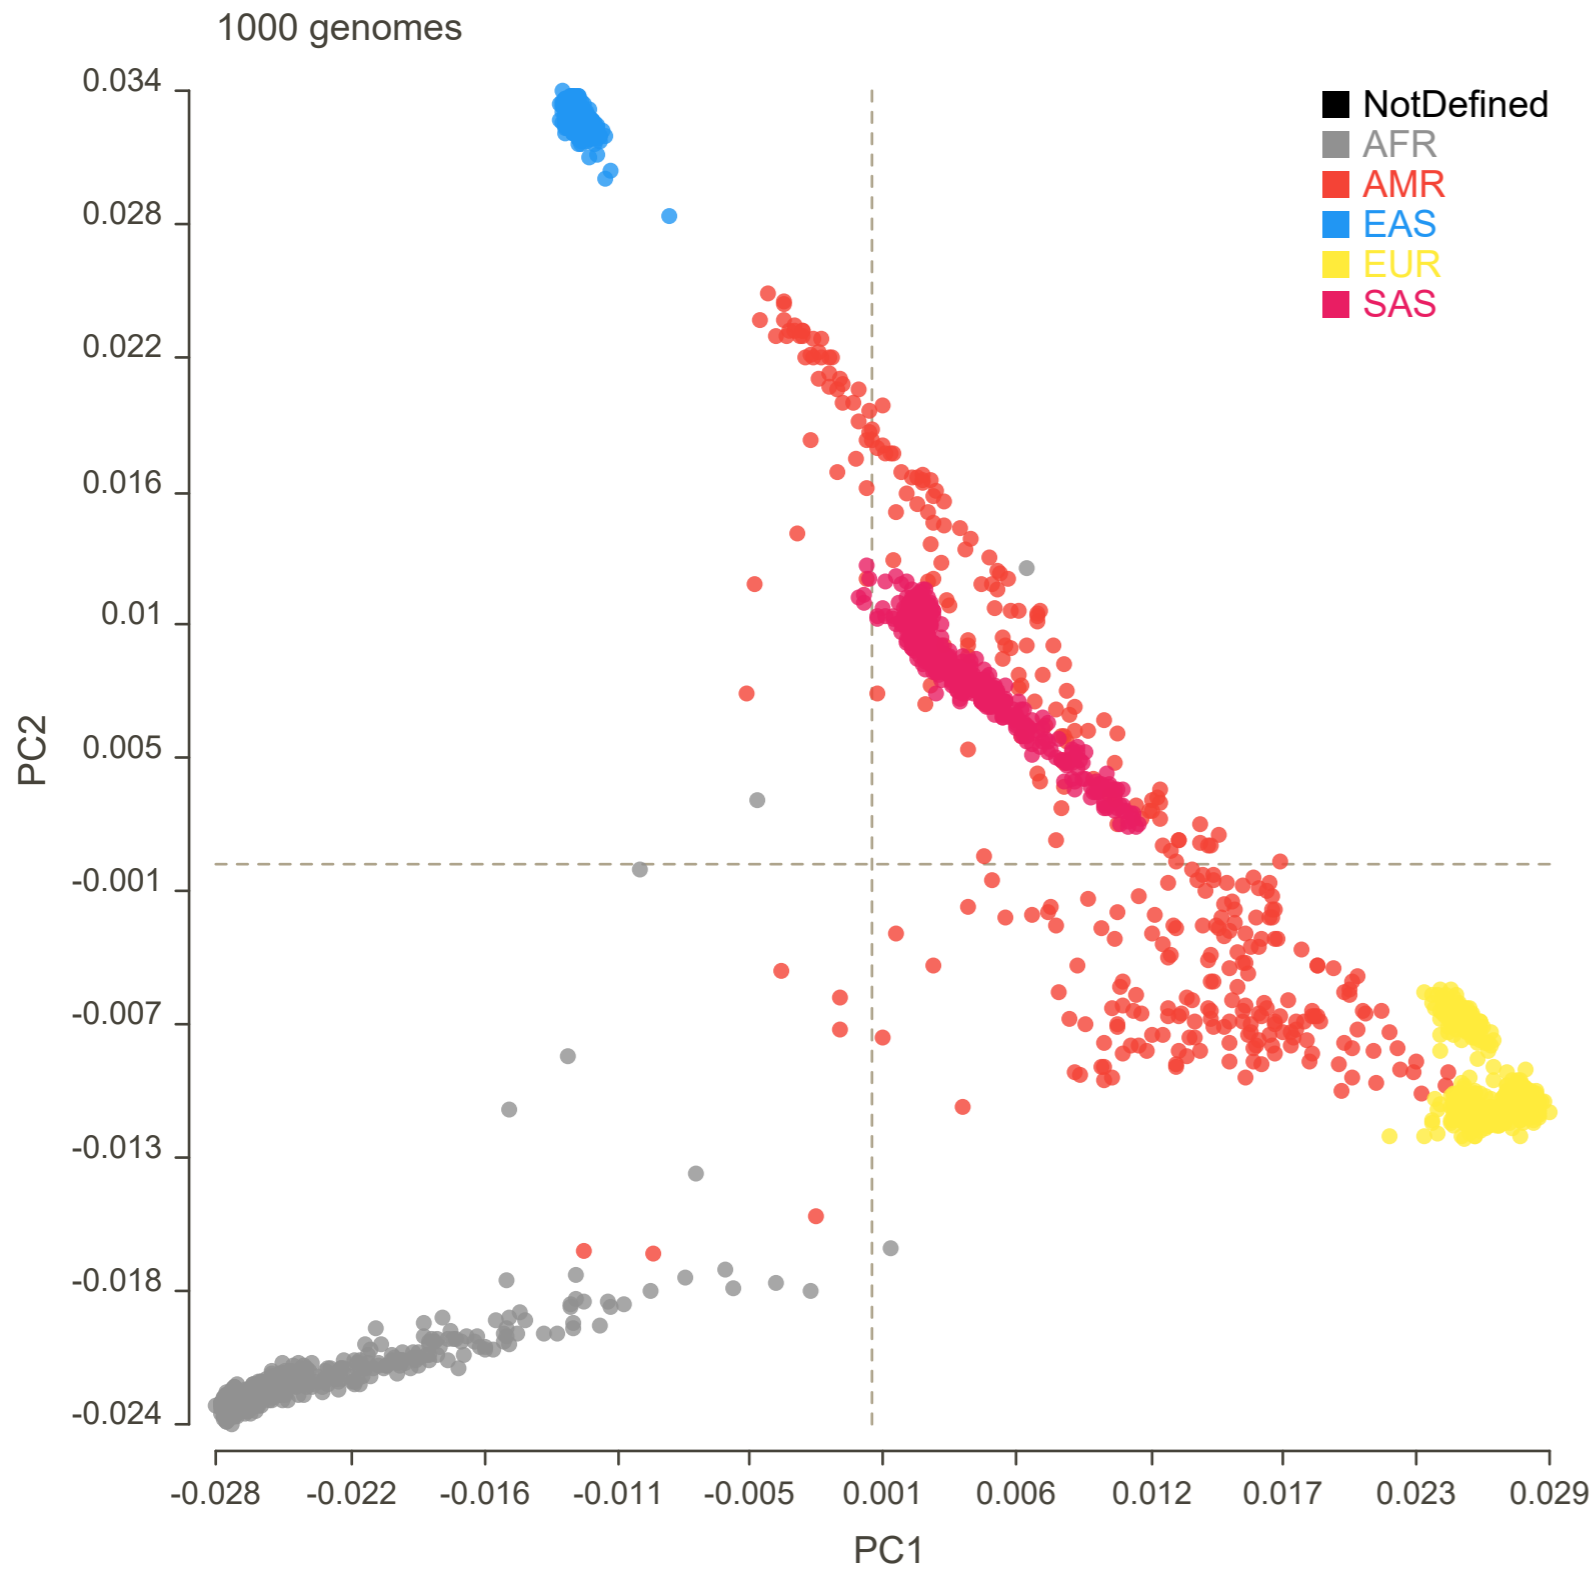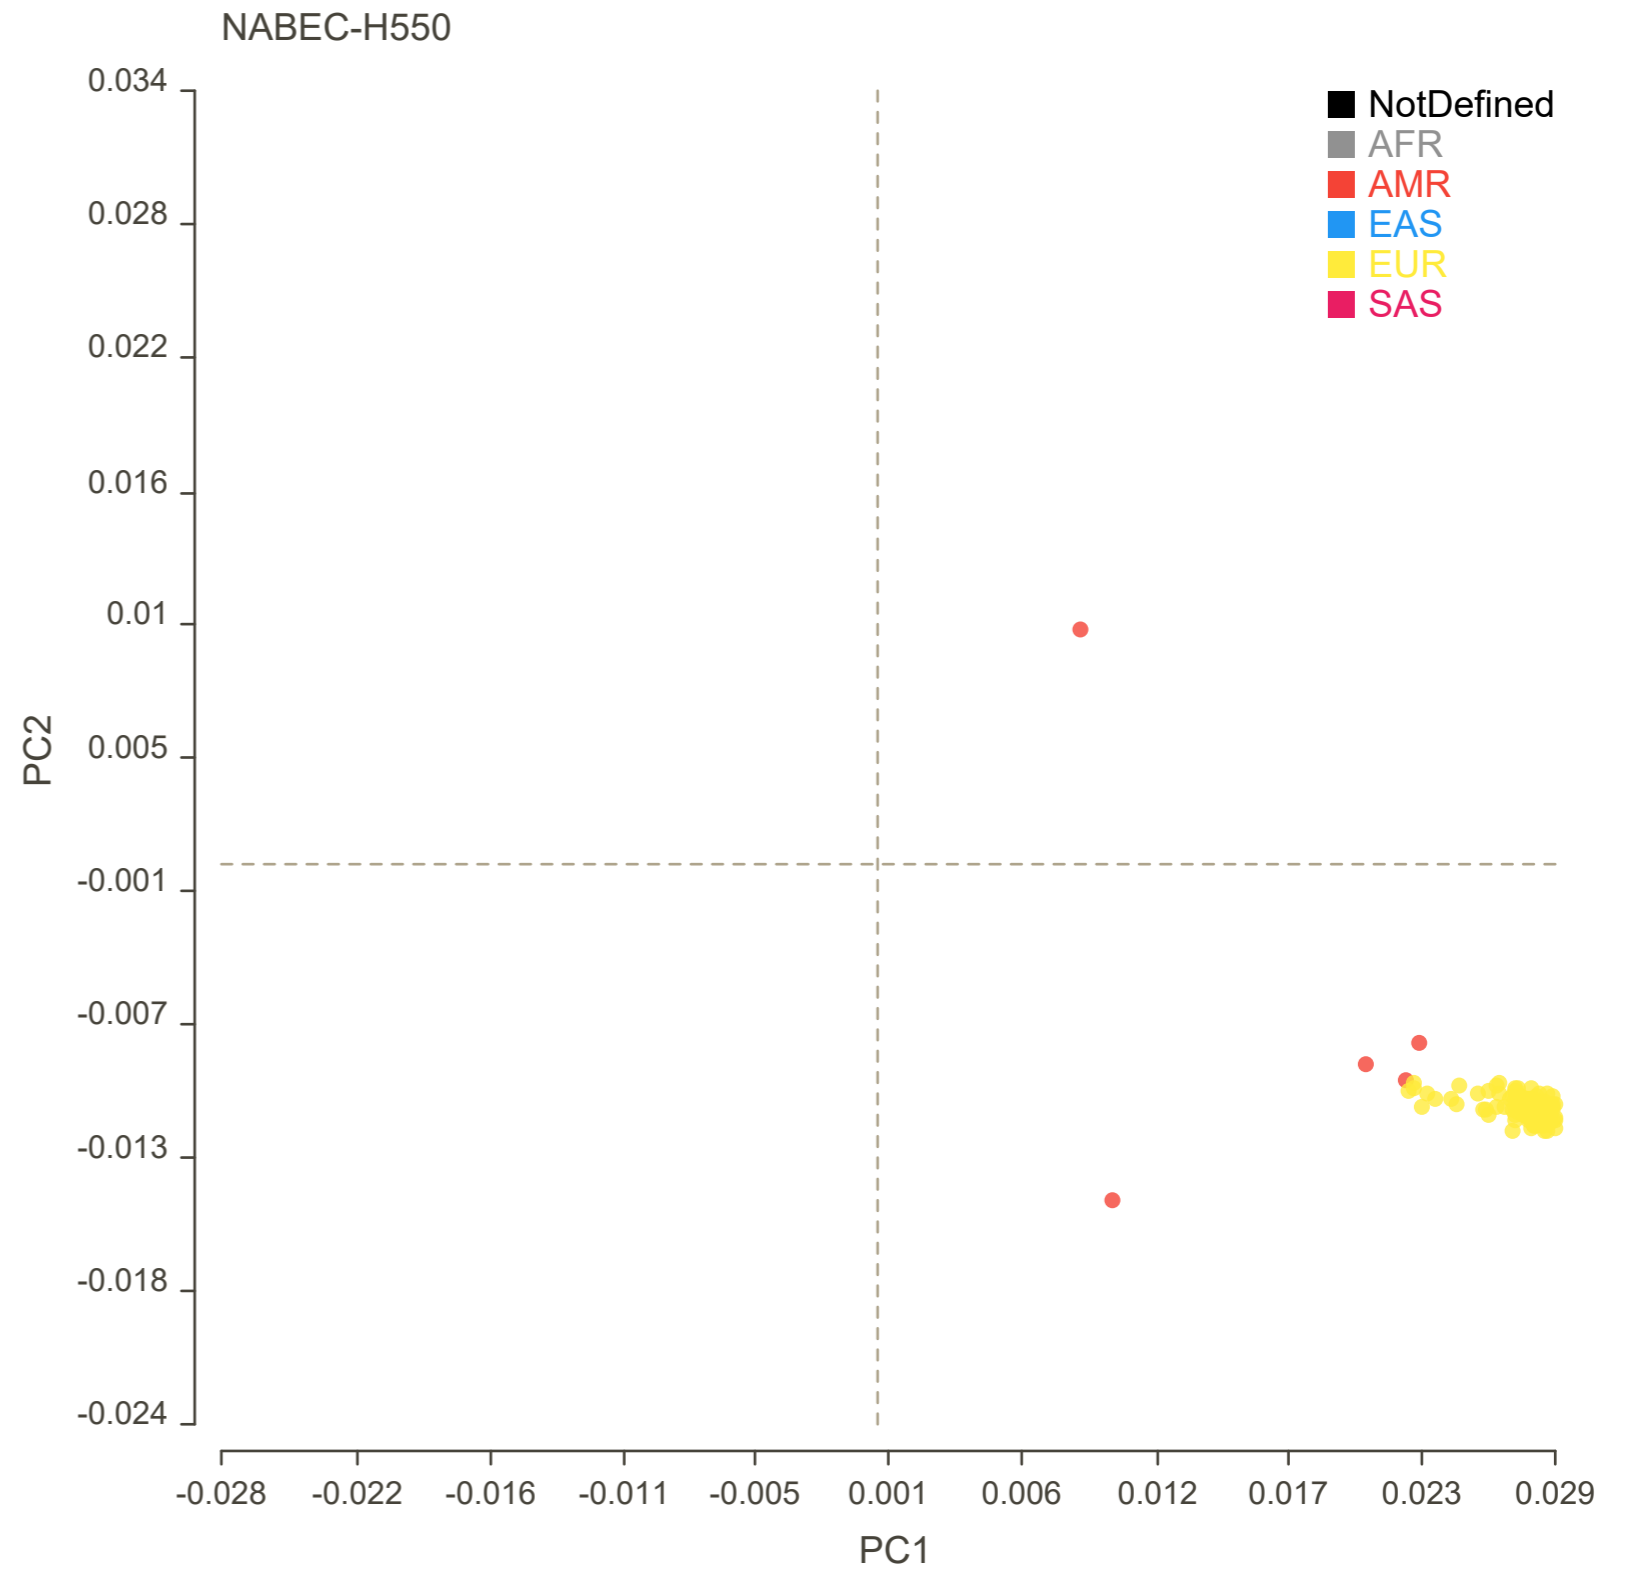

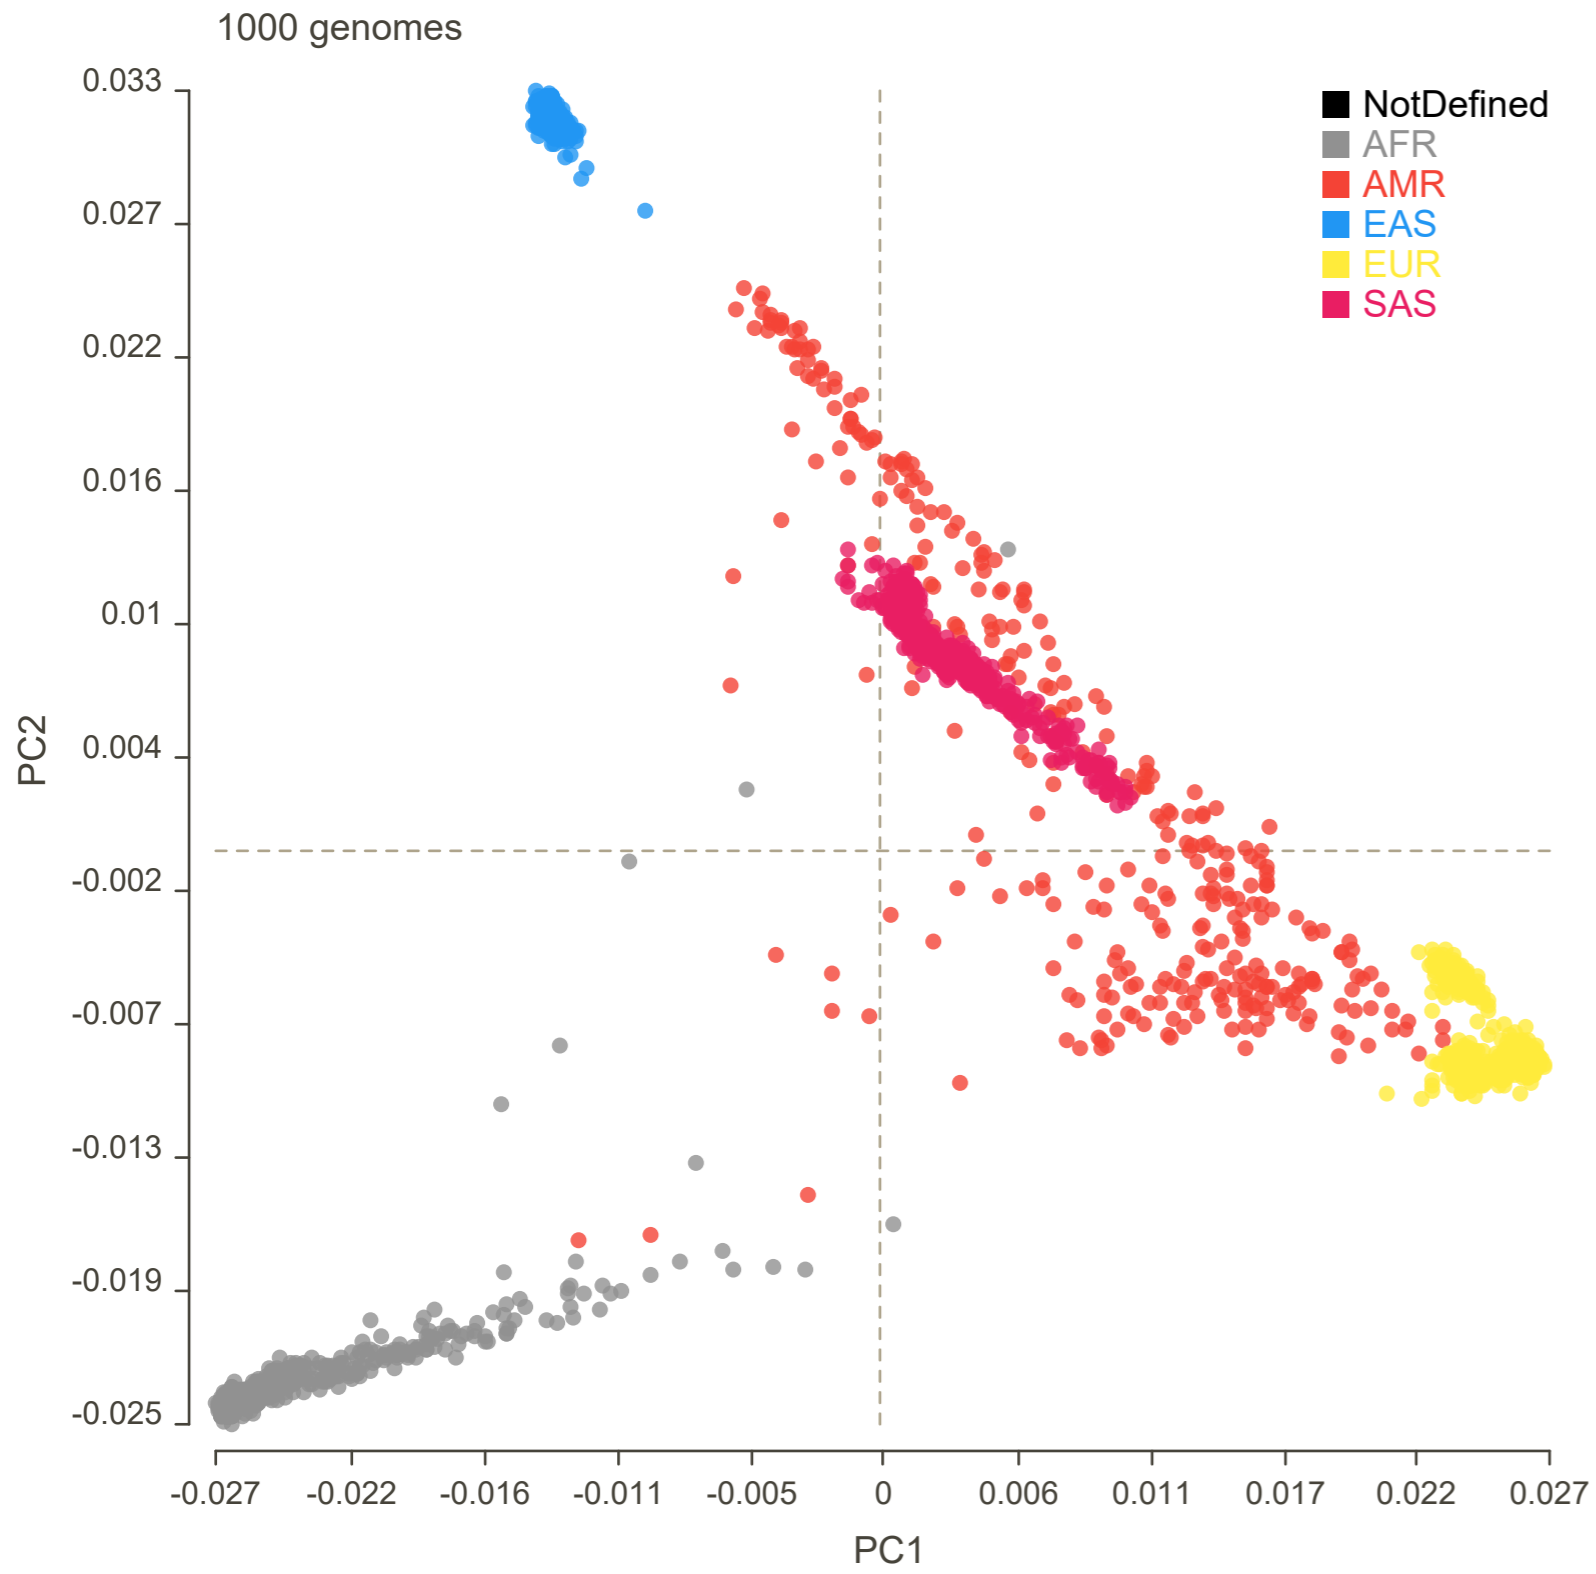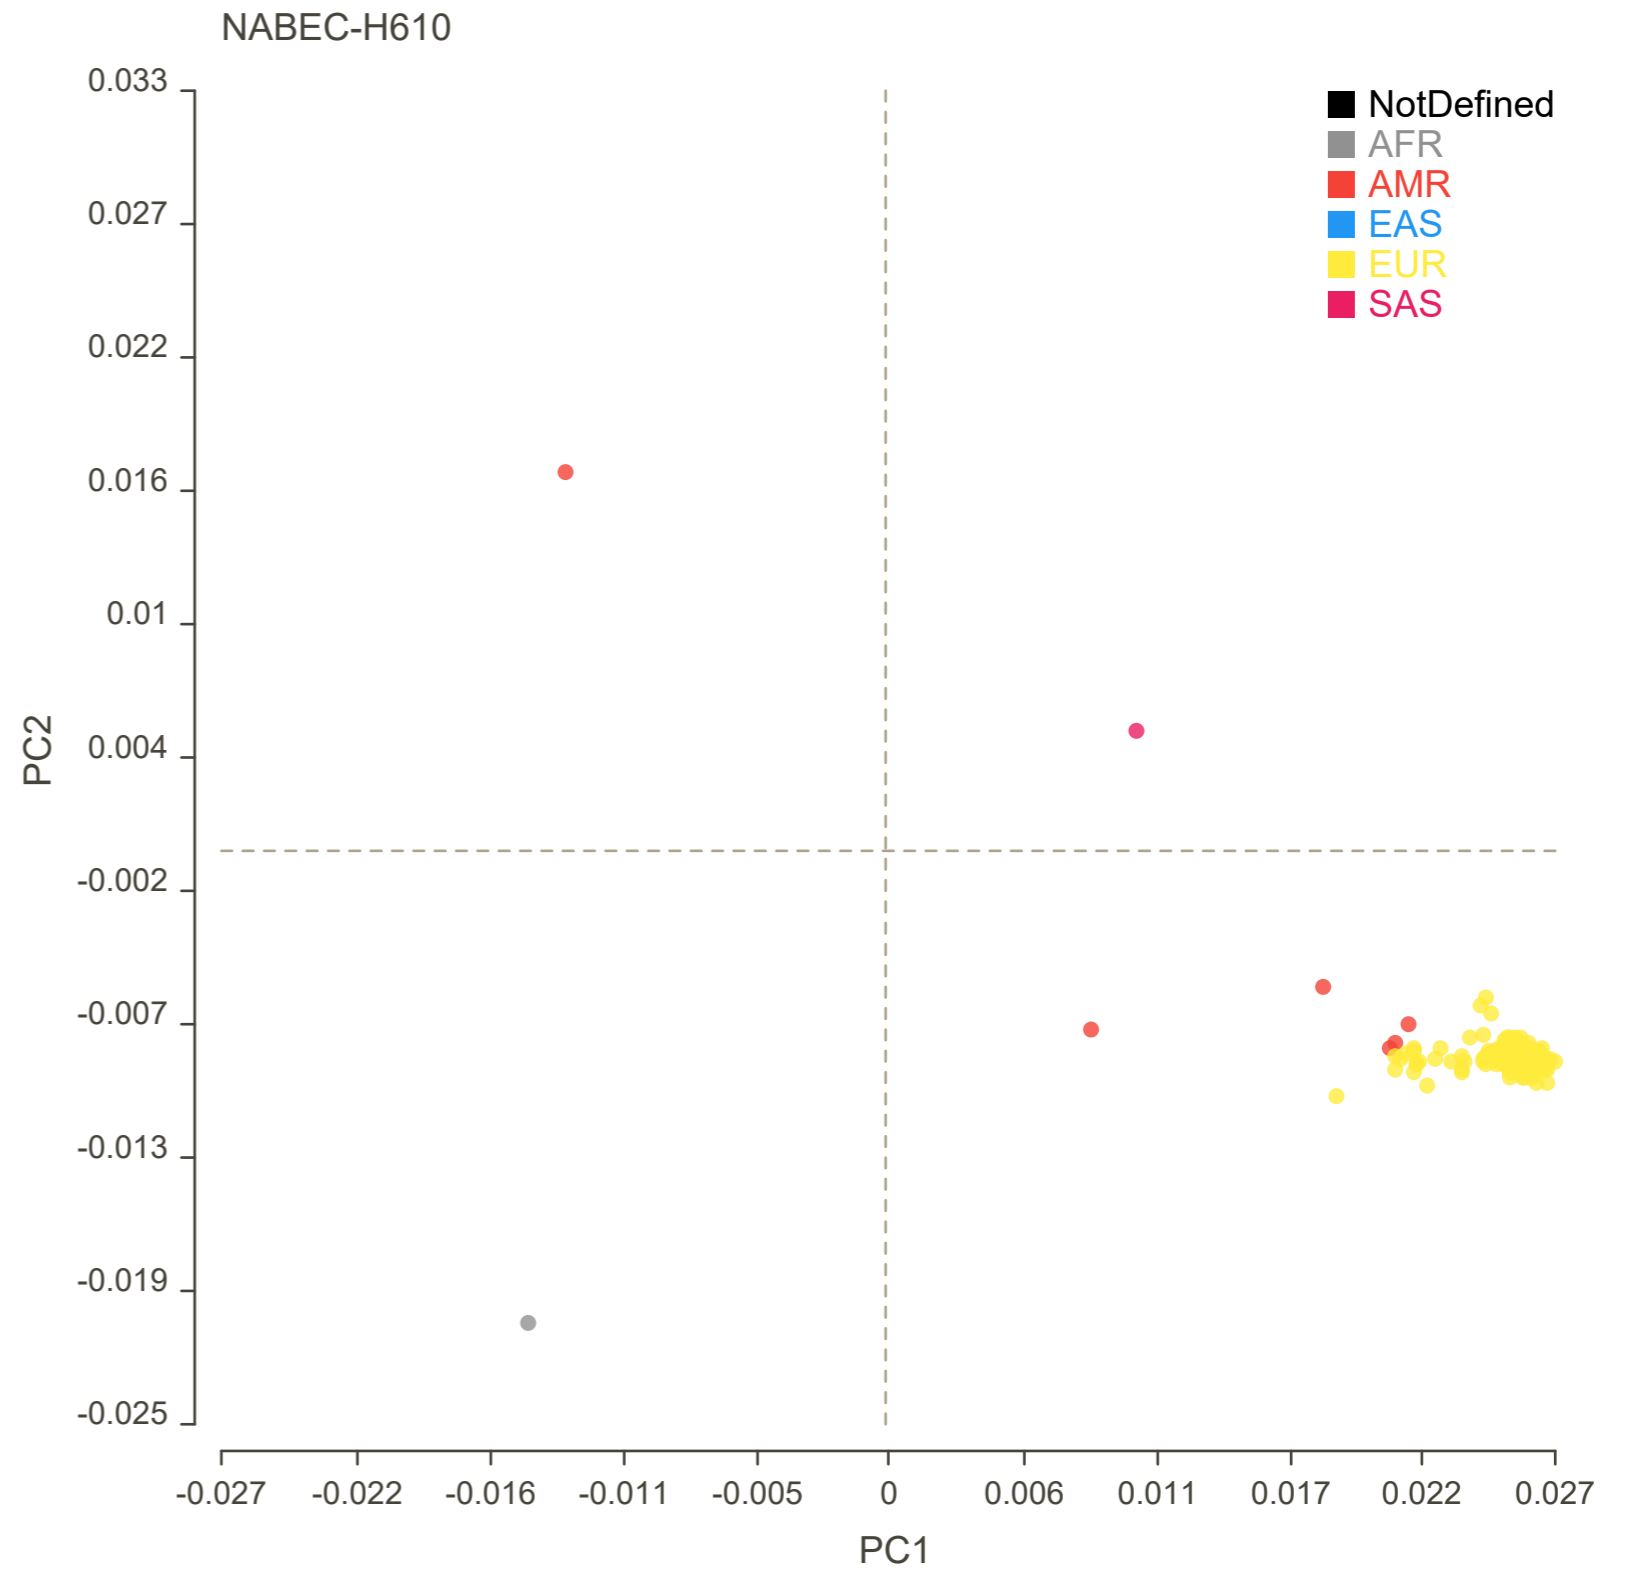

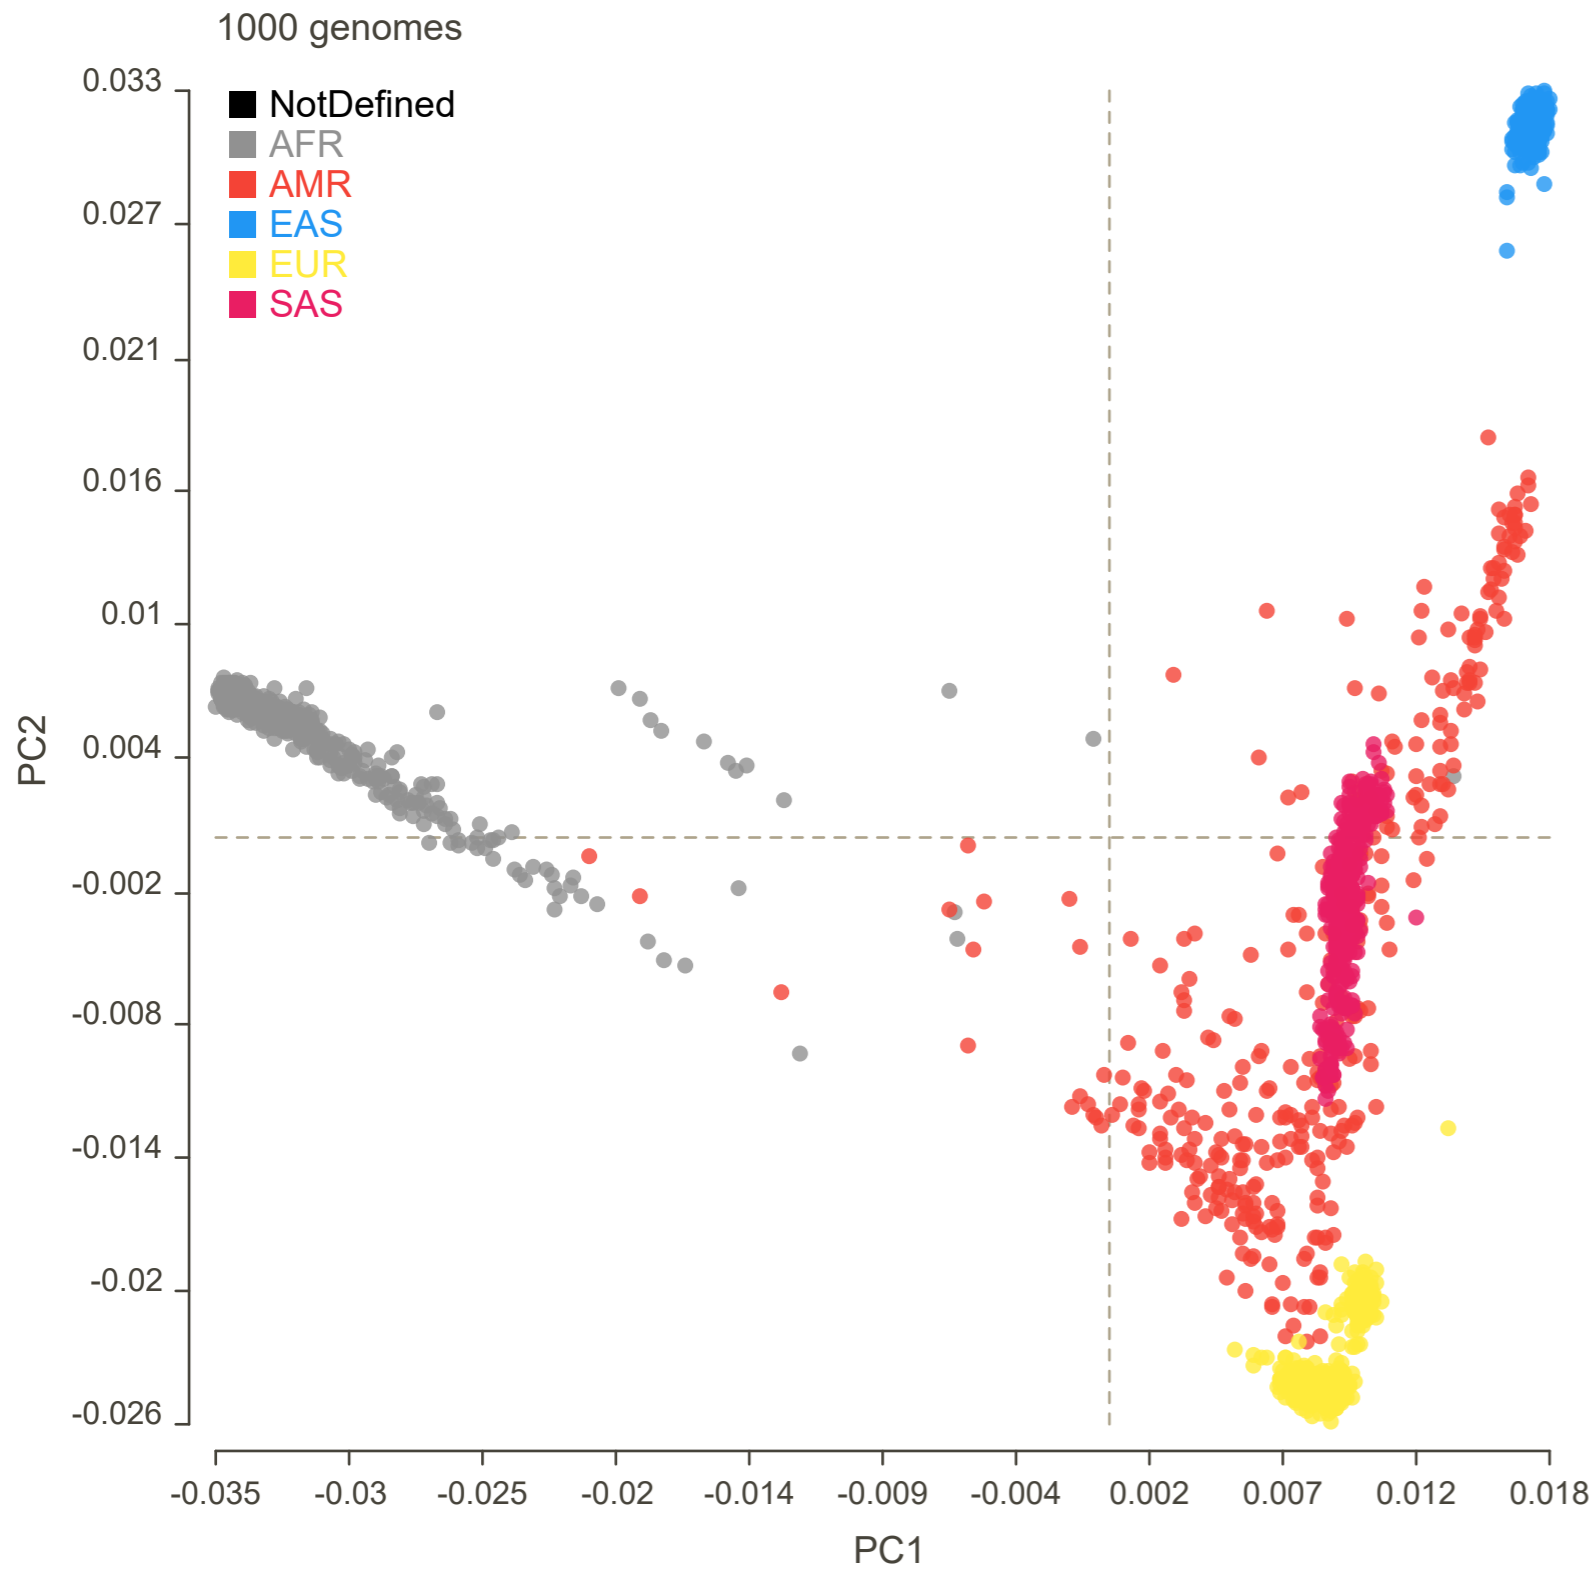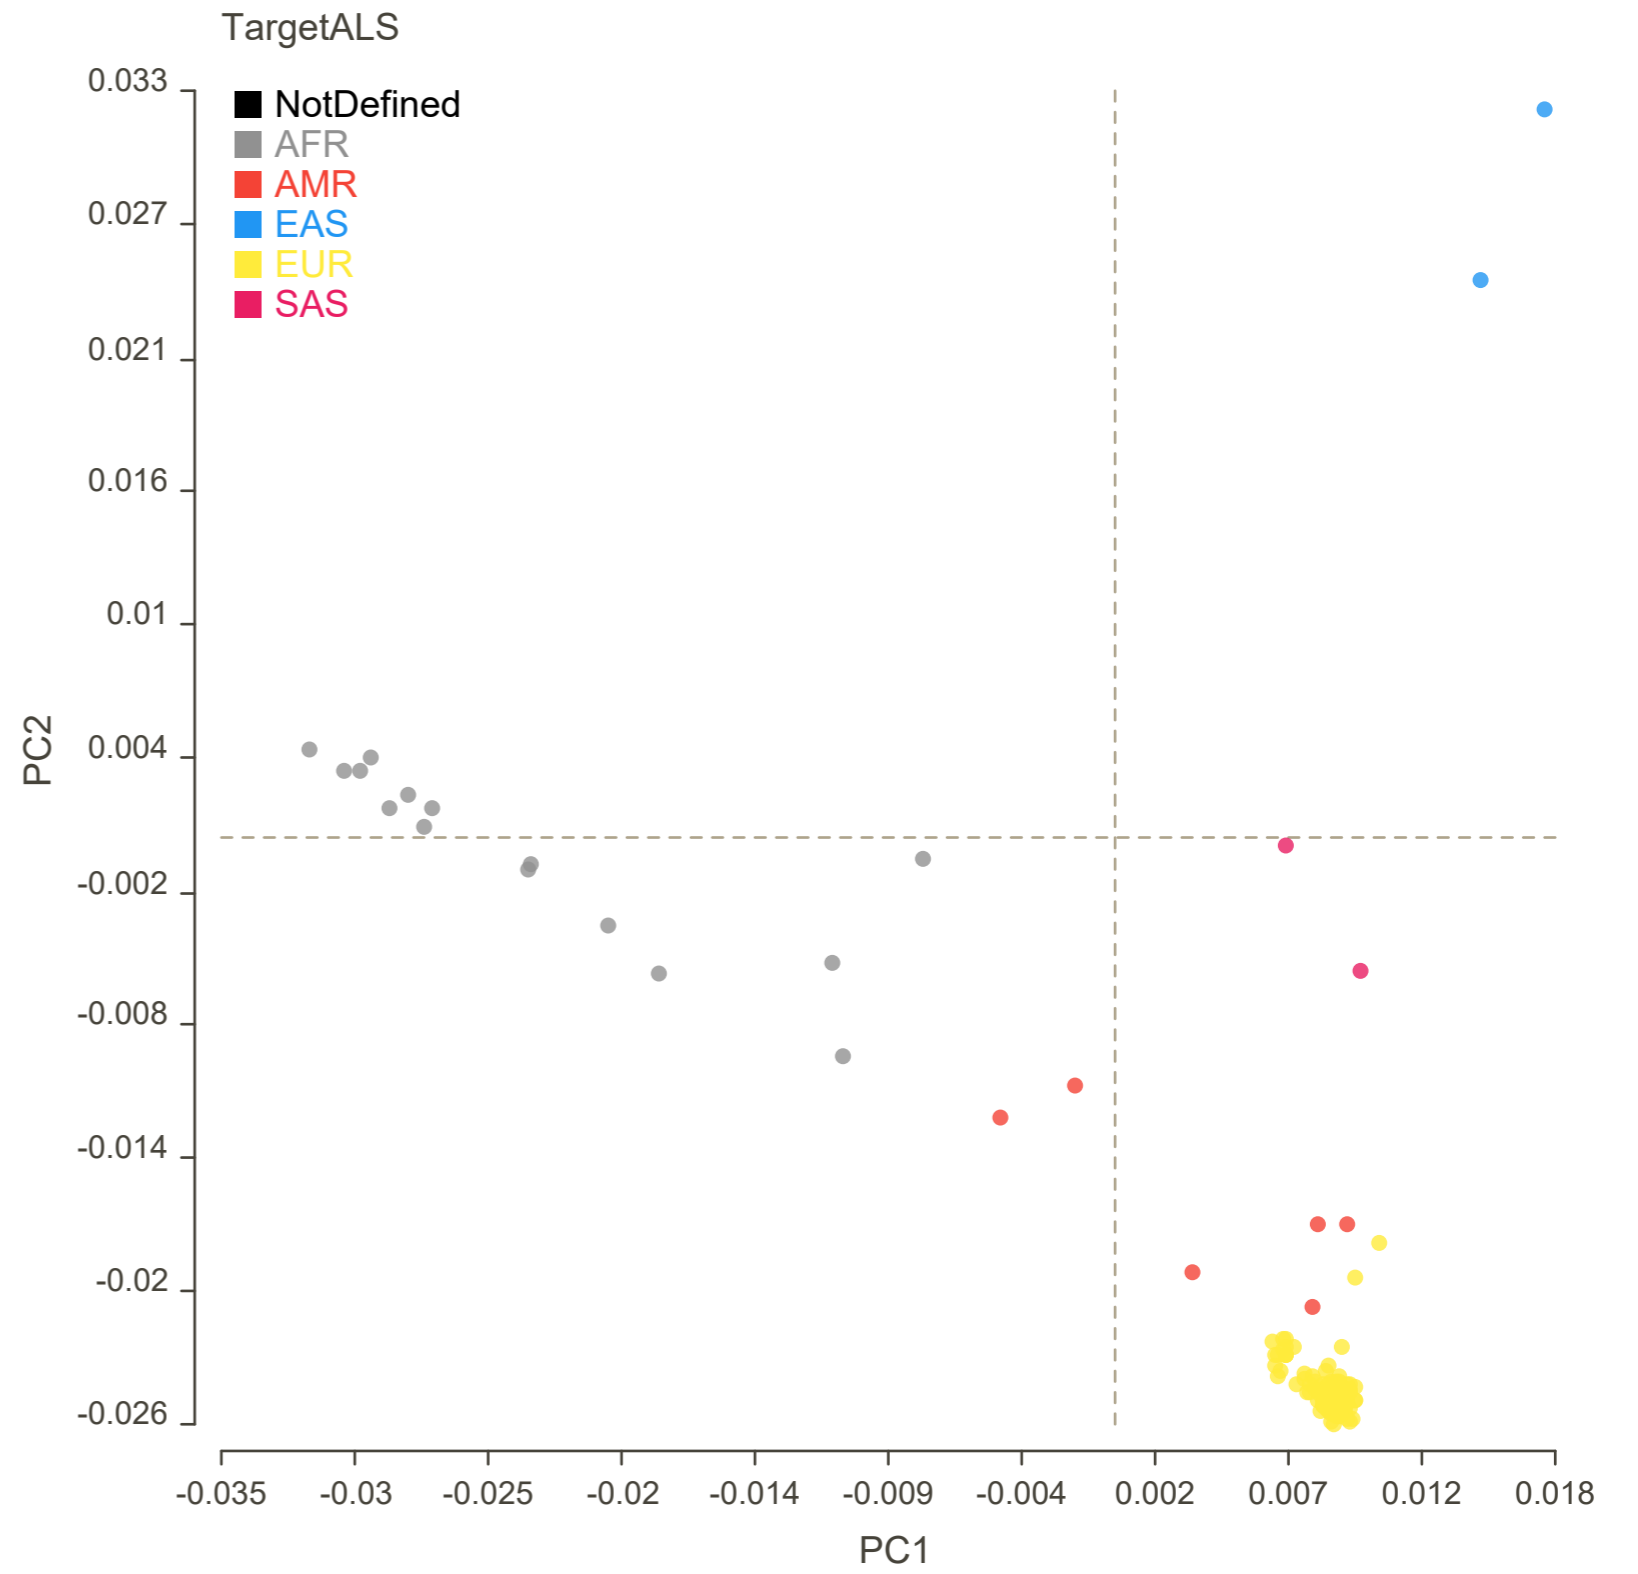

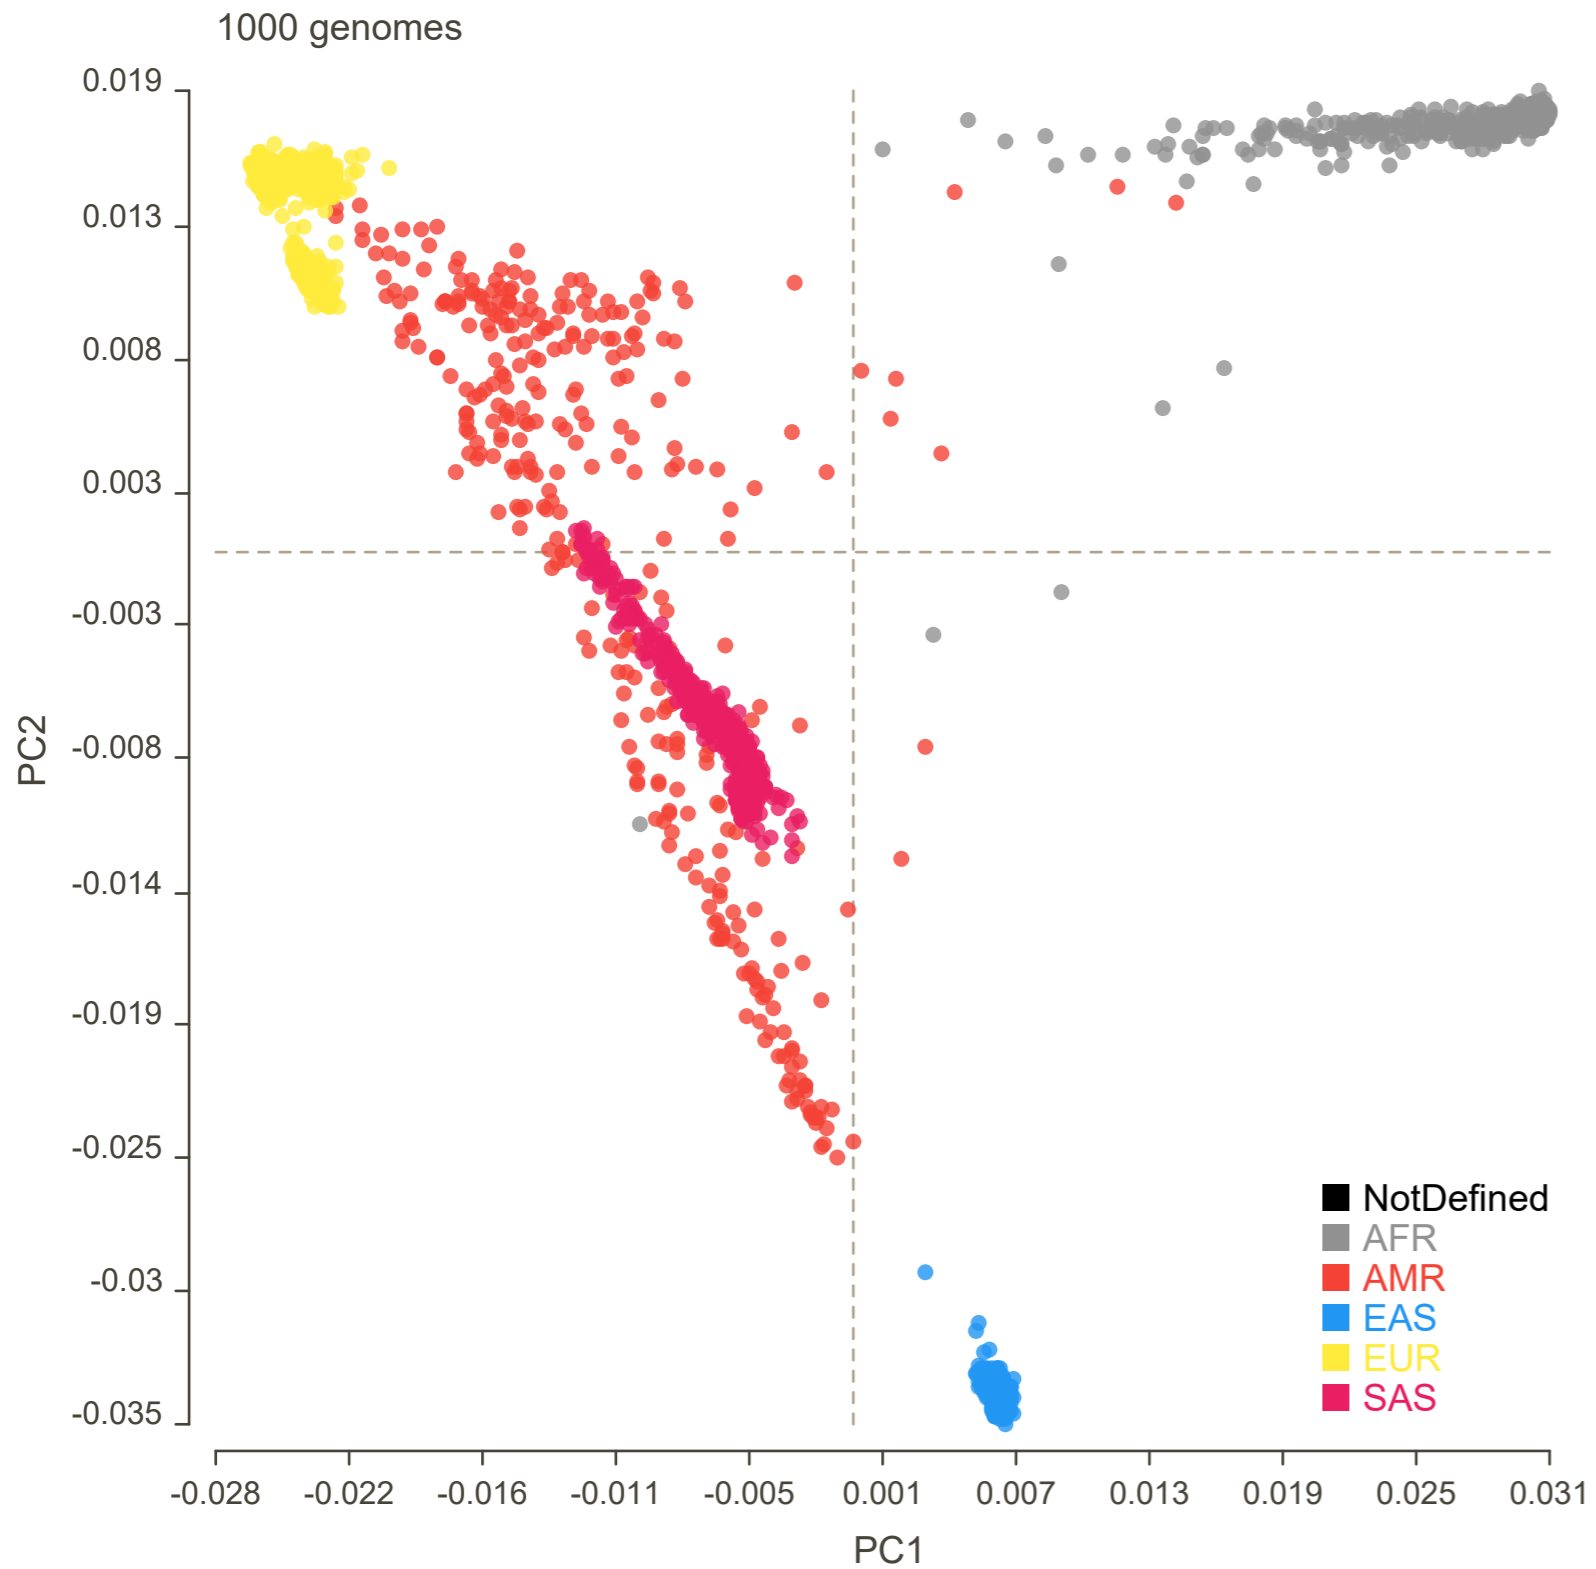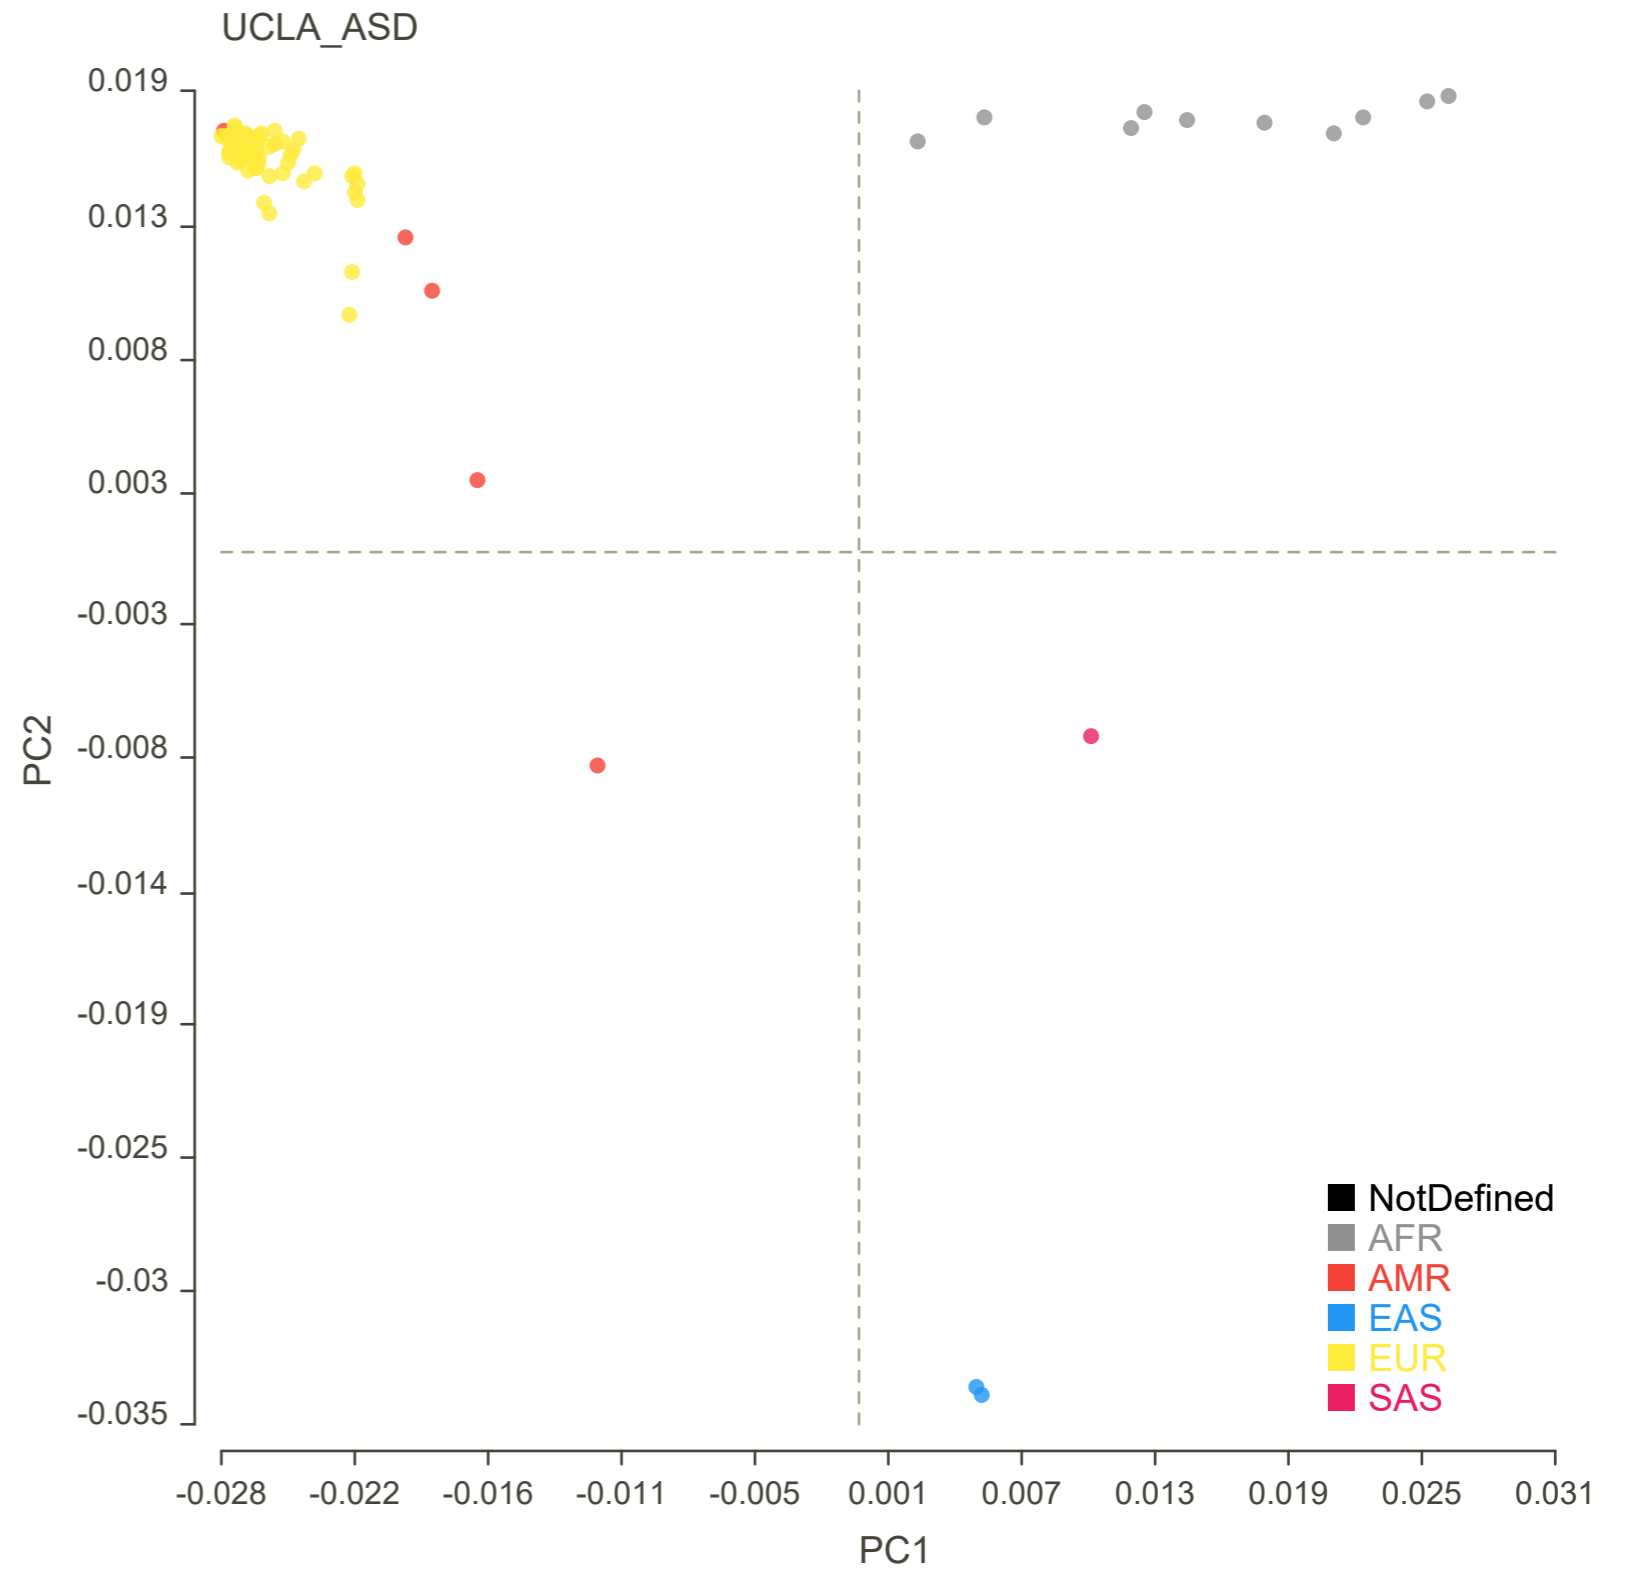

Supplement: Supplementary file [file media-7.pdf]
