# Supplementary material for: Brain expression quantitative trait locus and network analysis reveals downstream effects and putative drivers for brain-related diseases
Source: bioRxiv or medRxiv preprint supplement (doi:10.1101/2021.03.01.433439), 2021-03-05
Supplement: Supplementary file [file media-6.pdf]

**A**

● BipSeq    ● Brainseq  
● Braineac    ● CMC  
● BrainGVEx    ● CMC\_HBCC

**Dataset**

● ENA    ● MSBB    ● TargetALS  
● GTEx    ● NABEC    ● UCLA\_ASD  
● Mayo    ● ROSMAP

PC 2

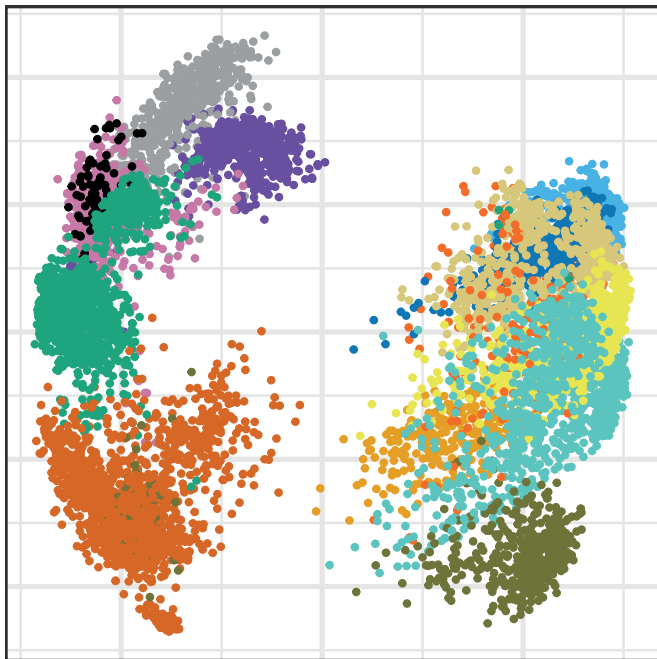

PC 1

**B**

PC 2

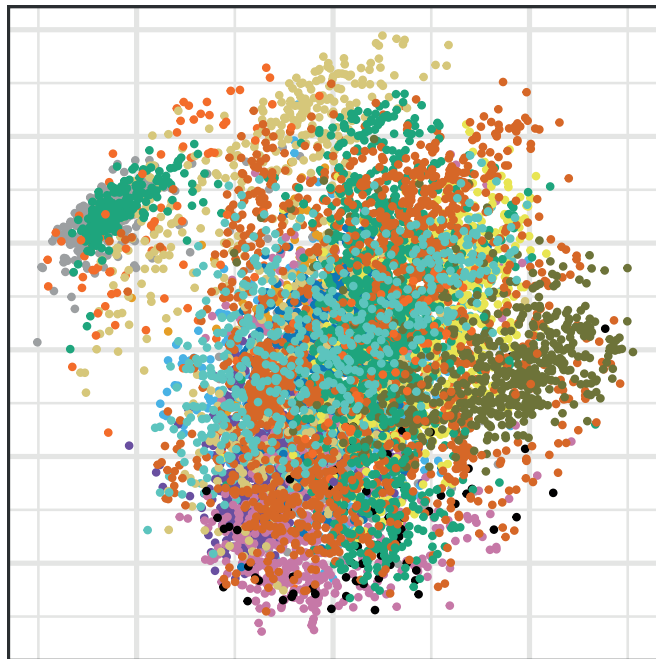

PC 1
